# Supplementary material
Source: publisher figshare collection journal article supplement (https://gsajournals.figshare.com/articles/dataset/_/14370026)
Supplement: Supplementary file 1 [file 1]

## Sheet: Table S1
Table S1. Primers for RT-qPCR
DEG ID	Gene ID	F-primer	R-primer
DEG1	BnaC03g22360D	GTTCTTGGAGTTTGGACGTTAC	GGGGCAACTTTCAAACACAATA
DEG2	BnaA03g30740D	GAATCTGGAACCAACACATCAC	TGATCGAGCGTTTAGATCTGTT
DEG3	BnaC06g35200D	GTACCCAAACACATCGCTTATC	GAGGCAAGTTCGAAGTGAATTT
DEG4	BnaC08g45610D	GGTGGAGACCTATGTATCATGG	TAGCAGCACTTGTTACTAACGA
DEG5	BnaC02g03430D	GGTTGCTTGAACTACATTGAGG	CGGCATTGTTTAAGATCTAGGC
DEG6	BnaC02g00320D	TCTTAATTCTTCCGACAAGGCT	TTTTGAGCAAAGGTTATGTGGG
DEG7	BnaC02g02960D	ATAAAGCCTCGAGACGTATCAG	TAGTTTCAAGAGCAAAACTGGC
DEG8	BnaA02g13880D	GTGAACGTGTATTTATGGGACG	GGTCAACATCTTCGTCCAAAAA
DEG9	BnaC02g03180D	GAACGAAAATGTGGAGGTTCAA	CAGCGTACATGTTTTCGAGAAA
DEG10	BnaC02g01270D	CTAAACGACCAACTTGTTGTGT	AAAGCTCTTTAACATCGTCAGC
DEG11	BnaA08g04020D	GATGATTTGTTGTTTGGTCCGA	CGACTGAAACAAAAACACAACG
DEG12	BnaA03g39040D	CACATGGAGCTTTGATGATTCC	GATAAGAAAGCTTGAGTGTGGC
DEG13	BnaA01g28120D	TCTTCATCTAAAACAATGGCGG	GAAGACAAAGAGCAAAGTGGAG
DEG14	BnaC05g42900D	GTTCATTCTCCCTACTCGTACG	CCGCGAGACTTATTATCATCCT
DEG15	BnaA05g10620D	CTCCTTCTGCTAGAGAGAGTTG	TGGTTACAGTAACTTGAGGACC
DEG16	BnaC03g09180D	GAGGTCATCTGTTTCTGAATGC	ATATGGTTGGAACACCTGAGAG
DEG17	BnaA08g25920D	AACTGTTGTTGATCCCGAGTAT	CTACAAGGGGACAATCTACTCC
DEG18	BnaA06g03570D	GATCTTATCGCGCACGTTATAC	ATCGTGCCCTGTTAAGAAAAAC
DEG19	BnaA01g36460D	AACTCGTTTCCCTCAGATCAAA	GCAGAAGAAAAGCTTGTTCAGA
DEG20	BnaC02g48340D	CAAAGTACCTCAGCGAAAACAA	ACATTCGTCGAGGTATTACGAA
	BnActin	CTGGAATTGCTGACCGTATGAG	ATCTGTTGGAAAGTGCTGAGGG

## Sheet: Table S2
Table S2 Log-max-likelihood values and AIC values of genetic models
Model	Log-Max-likelihood-Value	AIC
1MG-AD	-3211.06	6434.12
1MG-A	-3211.86	6433.71
1MG-EAD	-3214.75	6439.5
1MG-AEND	-3231.81	6473.62
2MG-ADI	-3121.32	6264.64
2MG-AD	-3193.95	6401.9
2MG-A	-3199.74	6409.47
2MG-EA	-3199.74	6407.47
2MG-AED	-3137.76	6285.51
2MG-EEAD	-3197.29	6402.59
MX1-AD-ADI	-3038.55	6093.11
MX1-AD-AD	-3169.15	6352.3
MX1-A-AD	-3175	6362
MX1-EAD-AD	-3175	6362
MX1-AEND-AD	-3175	6362
MX2-ADI-ADI	-3037.5	6099
MX2-ADI-AD	-3038.52	6095.05
MX2-AD-AD	-3175	6360
MX2-A-AD	-3175	6356
MX2-EAED-AD	-3175	6354
MX2-AED-AD	-3058.4	6122.8
MX2-EEAD-AD	-3175	6354
Note: MG: major gene model; MX: mixed major gene and polygene model; A: additive effect; D: dominance effect; I: epistatic interaction; E: equal; N: negative.

## Sheet: Table S3
Table S3 Fitness test of candidate models
Model	Generation	U12	U22	U32	nW2	Dn
MX1-AD-ADI	P1	0.037(0.8474)	0.5257(0.4684)	4.643(0.0312)	0.1975(0.2741)	0.025(1.000)
	P2	0.0005(0.983)	0.0096(0.9218)	0.2259(0.6346)	0.0966(0.6131)	0.0175(1.000)
	F1	0.1793(0.672)	0.6687(0.4135)	2.6605(0.1029)	0.1904(0.2882)	0.0295(1.000)
	F2	0.0003(0.987)	0.0015(0.9686)	0.0089(0.9249)	0.0468(0.8958)	0.0009(1.000)
MX2-ADI-ADI	P1	0.037(0.8474)	0.5257(0.4684)	4.643(0.0312)	0.1975(0.2741)	0.025(1.000)
	P2	0.0005(0.983)	0.0096(0.9218)	0.2259(0.6346)	0.0966(0.6131)	0.0175(1.000)
	F1	0.1793(0.672)	0.6687(0.4135)	2.6605(0.1029)	0.1904(0.2882)	0.0295(1.000)
	F2	0.0002(0.9896)	0.0002(0.9875)	0.0002(0.9902)	0.0417(0.9241)	0.001(1.000)
MX2-ADI-AD	P1	0.0471(0.8282)	0.5612(0.4538)	4.6474(0.0311)	0.1982(0.2727)	0.0247(1.000)
	P2	0.0026(0.9593)	0.0047(0.9451)	0.2238(0.6362)	0.0972(0.6099)	0.0177(1.000)
	F1	0.1287(0.7197)	0.5797(0.4464)	2.7419(0.0978)	0.1844(0.301)	0.0297(1.000)
	F2	0.0015(0.9695)	0.0037(0.9514)	0.0092(0.9238)	0.0436(0.9138)	0.0008(1.000)

## Sheet: Table S4
Table S4 Genetic parameters estimated in MX1-AD-ADI model
1st order genetic parameter	Estimate	2nd order genetic parameter	Estimate
m1	164.42	σ2mg	36.8314
m2	184.078	σ2pg	193.639
m3	127.48	h2mg(%）	0.139
m4	139.712	h2pg(%)	0.731
da(d)	7.0798
ha(h)	-6.7447
Note: m1- m4 : mean of population; da : additive effect of the major gene; ha : dominant effect of the first major gene; σ2mg: variance of major gene; σ2pg: variance of polygene; h2mg: heritability of major gene; h2pg : heritability of polygene.

## Sheet: Table S5
Table S5 The quality of the sequencing data from the QTL-seq
Library	Raw Base(bp)	Clean Base(bp)	Effective Rate(%)	Error Rate(%)	Q20(%)	Q30(%)	GC Content(%)
ZS11-HP	63688970700	63570930300	99.81	0.02	96.57	94.94	38.53
sdw-e	65812636800	65692377600	99.82	0.02	96.63	94.98	38.58
D-bulk	31630884000	31531090200	99.68	0.03	97.2	92.53	38.28
T-bulk	30733030800	30663948600	99.78	0.03	97.19	92.5	38.05

## Sheet: Table S6
Table S6 The statistics of comparison between the sequencing reads and reference genome in the two bulks
Bulk	Mapped reads	Total reads	Mapping rate(%)	Average depth(×)	Coverage at least (%)
ZS11-HP	417460881	423806202	98.5	69.62	94.37
sdw-e	431851048	437949184	98.61	69.96	94.34
D-bulk	207189123	210207268	98.56	33.47	96.55
T-bulk	201463910	204426324	98.55	32.82	96.6

## Sheet: Table S7
Table S7 Plant height of 200 individuals in the F2 population in Yangluo in 2018.
NO. of plant	Plant Height (cm)
18ZT330-01	181
18ZT330-02	164
18ZT330-03	155
18ZT330-04	171
18ZT330-06	122
18ZT330-07	152
18ZT330-08	166
18ZT330-09	165
18ZT330-10	156
18ZT330-11	156
18ZT330-12	148
18ZT330-13	150
18ZT330-14	165
18ZT330-15	151
18ZT330-16	186
18ZT330-17	168
18ZT330-18	165
18ZT330-19	160
18ZT330-20	134
18ZT330-21	165
18ZT330-22	177
18ZT330-23	166
18ZT330-24	172
18ZT330-26	156
18ZT330-27	185
18ZT330-28	168
18ZT330-29	169
18ZT330-30	175
18ZT330-31	145
18ZT330-32	200
18ZT330-33	170
18ZT330-34	164
18ZT330-35	170
18ZT330-36	166
18ZT330-37	178
18ZT330-38	185
18ZT330-40	187
18ZT330-41	163
18ZT330-42	173
18ZT330-43	156
18ZT330-44	159
18ZT330-45	160
18ZT331-01	156
18ZT331-02	185
18ZT331-03	150
18ZT331-04	175
18ZT331-05	156
18ZT331-06	165
18ZT331-07	153
18ZT331-08	166
18ZT331-09	138
18ZT331-10	183
18ZT331-11	137
18ZT331-12	162
18ZT331-13	176
18ZT331-15	161
18ZT331-16	175
18ZT331-17	161
18ZT331-18	171
18ZT331-19	152
18ZT331-20	180
18ZT331-22	187
18ZT331-23	168
18ZT331-24	174
18ZT331-25	156
18ZT331-27	158
18ZT331-28	160
18ZT331-29	162
18ZT331-30	168
18ZT331-31	155
18ZT331-32	178
18ZT331-33	130
18ZT331-34	173
18ZT331-35	167
18ZT331-36	170
18ZT331-37	175
18ZT331-38	170
18ZT331-39	146
18ZT331-40	158
18ZT331-41	165
18ZT331-42	146
18ZT331-43	167
18ZT331-44	181
18ZT331-45	154
18ZT331-46	178
18ZT331-47	161
18ZT332-01	165
18ZT332-02	178
18ZT332-03	161
18ZT332-04	165
18ZT332-05	176
18ZT332-06	157
18ZT332-07	178
18ZT332-08	141
18ZT332-09	166
18ZT332-10	183
18ZT332-11	161
18ZT332-12	153
18ZT332-14	147
18ZT332-15	168
18ZT332-16	165
18ZT332-17	175
18ZT332-18	161
18ZT332-19	141
18ZT332-20	152
18ZT332-21	168
18ZT332-22	140
18ZT332-23	178
18ZT332-24	139
18ZT332-27	181
18ZT332-28	191
18ZT332-29	175
18ZT332-30	167
18ZT332-31	173
18ZT332-32	196
18ZT332-34	161
18ZT332-35	173
18ZT332-36	165
18ZT332-38	180
18ZT332-39	137
18ZT332-40	151
18ZT332-41	170
18ZT332-42	158
18ZT332-43	163
18ZT332-44	145
18ZT332-45	162
18ZT332-46	142
18ZT332-47	107
18ZT332-48	172
18ZT333-01	140
18ZT333-02	150
18ZT333-03	170
18ZT333-04	150
18ZT333-05	171
18ZT333-06	145
18ZT333-08	150
18ZT333-09	179
18ZT333-10	151
18ZT333-11	165
18ZT333-12	152
18ZT333-13	165
18ZT333-14	160
18ZT333-15	178
18ZT333-16	167
18ZT333-18	147
18ZT333-19	156
18ZT333-20	157
18ZT333-22	158
18ZT333-23	191
18ZT333-24	132
18ZT333-25	154
18ZT333-26	165
18ZT333-27	155
18ZT333-28	185
18ZT333-29	147
18ZT333-30	140
18ZT333-31	155
18ZT333-32	167
18ZT333-33	145
18ZT333-34	170
18ZT333-35	144
18ZT333-36	150
18ZT333-37	158
18ZT333-38	167
18ZT333-39	159
18ZT333-40	169
18ZT333-41	161
18ZT333-42	161
18ZT333-43	151
18ZT333-44	181
18ZT333-46	170
18ZT333-47	180
18ZT333-48	138
18ZT327-01	134
18ZT327-02	155
18ZT327-04	162
18ZT327-05	135
18ZT327-06	157
18ZT327-07	180
18ZT327-08	159
18ZT327-11	181
18ZT327-12	170
18ZT327-13	148
18ZT327-14	172
18ZT327-15	135
18ZT327-18	175
18ZT327-19	166
18ZT327-20	180
18ZT327-21	182
18ZT327-24	154
18ZT327-26	133
18ZT327-27	169
18ZT327-28	153
18ZT327-29	178
18ZT327-30	160
18ZT327-33	180
18ZT327-34	172
18ZT327-38	150
18ZT327-40	175
18ZT327-41	175

## Sheet: Table S8
Table S8 The sequence data quality of 200 individuals in the F2 population
Sample Name	Clean Reads	Clean Base	Read Length	Q20(%)	GC(%)
18ZT332-45A	68689280	10303392000	150	97.25	36.83
18ZT332-47A	65634172	9845125800	150	97.08	37.36
18ZT332-48A	68913330	10336999500	150	97.45	37.23
18ZT333-01A	65750152	9862522800	150	97.54	36.47
18ZT333-02A	71433436	10715015400	150	97.53	35.78
18ZT333-03A	63931548	9589732200	150	97.34	37.42
18ZT333-04A	56973952	8546092800	150	96.82	36.73
18ZT333-05A	62668678	9400301700	150	97.08	37.28
18ZT333-06A	61168774	9175316100	150	97.13	36.63
18ZT333-08A	54397162	8159574300	150	96.99	36.17
18ZT333-09A	54159854	8123978100	150	96.7	36.5
18ZT333-10A	63361192	9504178800	150	97	36.72
18ZT333-11A	61498332	9224749800	150	96.84	36.94
18ZT333-12A	60636214	9095432100	150	96.71	37.4
18ZT333-13A	65356366	9803454900	150	97.33	36.57
18ZT333-14A	74944962	11241744300	150	97.42	36.3
18ZT333-15A	65111186	9766677900	150	97.21	36.43
18ZT333-16A	67963740	10194561000	150	97.03	36.35
18ZT333-18A	62715008	9407251200	150	97.01	36.68
18ZT333-19A	60755716	9113357400	150	97.15	35.73
18ZT333-20A	65838328	9875749200	150	97.19	36.74
18ZT333-22A	58351416	8752712400	150	97.17	37.29
18ZT333-23A	52996830	7949524500	150	97.19	37.27
18ZT333-24A	61775552	9266332800	150	97.06	35.45
18ZT332-16A	68858484	10328772600	150	97.52	37.58
18ZT332-17A	53870090	8080513500	150	97.21	37.07
18ZT332-18A	70235228	10535284200	150	97.37	36.8
18ZT332-19A	65306902	9796035300	150	97.28	37.12
18ZT332-20A	65438492	9815773800	150	97.18	37.15
18ZT332-21A	67589304	10138395600	150	97.2	37.25
18ZT332-22A	60793236	9118985400	150	97.22	37.45
18ZT332-23A	60620506	9093075900	150	97.39	37.04
18ZT332-24A	68281330	10242199500	150	97.56	37.49
18ZT332-27A	55502828	8325424200	150	97.26	36.84
18ZT332-28A	67034032	10055104800	150	96.98	37.24
18ZT332-29A	71208894	10681334100	150	97.38	37.1
18ZT332-30A	62679816	9401972400	150	97.1	37.5
18ZT332-31A	68188916	10228337400	150	97.22	37.37
18ZT332-32A	63181994	9477299100	150	97.21	37.31
18ZT332-34A	65541728	9831259200	150	97.43	37.35
18ZT332-35A	61570000	9235500000	150	97.51	37.1
18ZT332-36A	67196552	10079482800	150	97.36	36.97
18ZT332-38A	67426264	10113939600	150	97.56	36.76
18ZT332-39A	61841508	9276226200	150	97.13	37
18ZT332-40A	66576792	9986518800	150	97.26	37.06
18ZT332-41A	73379762	11006964300	150	97.45	37.04
18ZT332-42A	66422786	9963417900	150	97.5	36.9
18ZT332-43A	72155710	10823356500	150	97.52	36.46
18ZT327-04A	71092080	10663812000	150	97.56	36.63
18ZT327-05A	55260188	8289028200	150	96.83	36.06
18ZT327-06A	60459570	9068935500	150	97.11	36.84
18ZT327-07A	64600396	9690059400	150	97.37	36.68
18ZT327-08A	57638088	8645713200	150	96.95	37.42
18ZT327-11A	61520922	9228138300	150	97.2	36.51
18ZT327-13A	58947554	8842133100	150	97.22	36.69
18ZT327-14A	81220544	12183081600	150	97.59	36.79
18ZT327-15A	63828356	9574253400	150	97.42	36.52
18ZT327-18A	60376136	9056420400	150	97.18	37.16
18ZT327-19A	53060360	7959054000	150	97.19	35.84
18ZT327-20A	51364836	7704725400	150	97.37	36.53
18ZT327-21A	65395866	9809379900	150	97.24	37.28
18ZT327-26A	59805932	8970889800	150	97.1	36.98
18ZT327-27A	55521308	8328196200	150	96.71	37.72
18ZT327-28A	60519900	9077985000	150	96.89	36.66
18ZT327-29A	56001574	8400236100	150	96.91	36.84
18ZT327-30A	59390568	8908585200	150	97.15	37.05
18ZT327-33A	70507650	10576147500	150	96.96	36.58
18ZT327-34A	58642474	8796371100	150	96.8	37.32
18ZT327-38A	51881182	7782177300	150	97.2	36.99
18ZT327-40A	66635350	9995302500	150	97.13	37.11
18ZT327-41A	61133638	9170045700	150	96.96	37.1
18ZT333-25A	71133504	10670025600	150	96.86	36.6
18ZT333-26A	64185500	9627825000	150	96.78	37.03
18ZT333-27A	57994990	8699248500	150	96.73	36.68
18ZT333-28A	64014754	9602213100	150	97.02	36.18
18ZT333-29A	58441240	8766186000	150	96.43	37.62
18ZT333-30A	61606062	9240909300	150	96.89	37.68
18ZT333-31A	56441082	8466162300	150	96.81	37.43
18ZT333-32A	59782650	8967397500	150	96.64	37.16
18ZT333-33A	61173464	9176019600	150	96.92	37.25
18ZT333-34A	61160060	9174009000	150	96.44	37.28
18ZT333-35A	54663794	8199569100	150	96.32	37.83
18ZT333-36A	58259212	8738881800	150	96.59	37.08
18ZT333-37A	53711626	8056743900	150	96.74	37.46
18ZT333-38A	53457670	8018650500	150	96.34	38.17
18ZT333-39A	56133140	8419971000	150	96.64	37.39
18ZT333-40A	62636924	9395538600	150	96.83	37.97
18ZT333-41A	66018288	9902743200	150	96.77	36.43
18ZT333-43A	62847824	9427173600	150	96.97	38.03
18ZT333-44A	58567000	8785050000	150	96.41	37.65
18ZT333-47A	58977504	8846625600	150	96.48	38.45
18ZT333-48A	54902320	8235348000	150	96.07	36.87
18ZT327-01A	69038922	10355838300	150	96.97	37.92
18ZT327-02A	62893808	9434071200	150	96.75	37.61
18ZT330-28A	69139248	10370887200	150	96.96	37.06
18ZT330-29A	70913378	10637006700	150	97.16	37.34
18ZT330-30A	50207970	7531195500	150	96.53	37.34
18ZT330-31A	75197950	11279692500	150	96.98	36.65
18ZT330-32A	58566496	8784974400	150	96.85	37.7
18ZT330-33A	45264598	6789689700	150	96.55	37.82
18ZT330-34A	64406230	9660934500	150	96.82	38.11
18ZT330-35A	63198850	9479827500	150	96.7	37.6
18ZT330-36A	62253244	9337986600	150	96.54	37.13
18ZT330-37A	59652206	8947830900	150	96.43	37.41
18ZT330-38A	64998414	9749762100	150	96.81	36.82
18ZT330-40A	56598252	8489737800	150	97.13	36.99
18ZT330-41A	69444536	10416680400	150	97.03	36.86
18ZT330-42A	66201712	9930256800	150	97.37	37.87
18ZT330-43A	65615890	9842383500	150	96.83	37.22
18ZT330-44A	67612156	10141823400	150	96.93	37.5
18ZT330-45A	59600372	8940055800	150	96.81	37.23
18ZT331-01A	63502690	9525403500	150	96.94	36.44
18ZT331-02A	65880788	9882118200	150	97.11	37.13
18ZT331-03A	62404258	9360638700	150	97	36.63
18ZT331-04A	65142864	9771429600	150	97.18	36.86
18ZT331-05A	57093068	8563960200	150	96.39	37.06
18ZT331-06A	56088512	8413276800	150	96.83	37.1
18ZT331-07A	71225272	10683790800	150	96.94	37.51
18ZT331-08A	63668658	9550298700	150	97	37.42
18ZT330-01A	76149578	11422436700	150	97.48	37.44
18ZT330-02A	69467538	10420130700	150	97.55	36.88
18ZT330-03A	61326238	9198935700	150	96.9	37.43
18ZT330-04A	80540292	12081043800	150	97.58	37.27
18ZT330-06A	64390248	9658537200	150	97.12	37.55
18ZT330-07A	66105128	9915769200	150	96.99	37.52
18ZT330-08A	69476244	10421436600	150	97.14	37.28
18ZT330-09A	68217118	10232567700	150	96.86	37.41
18ZT330-10A	61086950	9163042500	150	96.91	37.29
18ZT330-11A	63590476	9538571400	150	96.82	37.33
18ZT330-13A	69861950	10479292500	150	97.16	37.62
18ZT330-15A	55402614	8310392100	150	96.45	37.16
18ZT330-16A	62038552	9305782800	150	96.86	37.5
18ZT330-17A	59413586	8912037900	150	96.99	37.34
18ZT330-18A	59894120	8984118000	150	97.19	37.24
18ZT330-19A	64796312	9719446800	150	97.14	37.42
18ZT330-20A	56388688	8458303200	150	96.05	37.64
18ZT330-21A	46338812	6950821800	150	95.23	37.51
18ZT330-22A	58514758	8777213700	150	95.52	37.66
18ZT330-23A	57055082	8558262300	150	95.69	37.43
18ZT330-24A	53593202	8038980300	150	95.9	37.47
18ZT330-26A	53308630	7996294500	150	95.64	37.82
18ZT330-27A	60987988	9148198200	150	96.12	37.84
18ZT331-37A	67445300	10116795000	150	96.33	37.59
18ZT331-38A	51545334	7731800100	150	95.7	38
18ZT331-39A	52498638	7874795700	150	95.82	37.31
18ZT331-40A	55290454	8293568100	150	95.81	37.33
18ZT331-41A	51852354	7777853100	150	95.69	37.52
18ZT331-42A	61384092	9207613800	150	95.77	38.31
18ZT331-43A	53672088	8050813200	150	95.77	37.09
18ZT331-44A	58115052	8717257800	150	95.87	37.54
18ZT331-45A	64265034	9639755100	150	96.93	37.12
18ZT331-46A	63436100	9515415000	150	97.08	37.29
18ZT331-47A	67758282	10163742300	150	96.81	36.42
18ZT332-01A	60468656	9070298400	150	96.86	37.42
18ZT332-02A	72032004	10804800600	150	97.11	37.3
18ZT332-03A	67131538	10069730700	150	96.87	37.55
18ZT332-04A	58818202	8822730300	150	96.94	37.61
18ZT332-05A	59174656	8876198400	150	96.83	37.58
18ZT332-06A	60653168	9097975200	150	96.6	37.32
18ZT332-07A	56585674	8487851100	150	96.59	37.27
18ZT332-08A	58550318	8782547700	150	96.62	37.34
18ZT332-09A	57617850	8642677500	150	96.14	37.33
18ZT332-10A	64404030	9660604500	150	96.9	37.43
18ZT332-11A	66016474	9902471100	150	96.49	37.66
18ZT332-12A	61505772	9225865800	150	96.54	37.68
18ZT332-14A	63715356	9557303400	150	96.74	37.65
18ZT332-15A	68544220	10281633000	150	96.9	37.66
18ZT331-09A	59920650	8988097500	150	96.83	37.15
18ZT331-10A	67500086	10125012900	150	96.69	37.62
18ZT331-11A	60830528	9124579200	150	97	37.41
18ZT331-12A	49271330	7390699500	150	96.44	37.56
18ZT331-13A	62726494	9408974100	150	96.69	37.06
18ZT331-15A	62996564	9449484600	150	97.06	37.66
18ZT331-16A	62007744	9301161600	150	96.77	36.99
18ZT331-17A	67202288	10080343200	150	96.76	37.65
18ZT331-18A	60903208	9135481200	150	97	36.94
18ZT331-19A	73445534	11016830100	150	97.36	37.18
18ZT331-20A	71793804	10769070600	150	97.07	37.08
18ZT331-22A	66499650	9974947500	150	97.04	37.17
18ZT331-23A	64732320	9709848000	150	96.99	37.19
18ZT331-24A	57703358	8655503700	150	96.2	37.28
18ZT331-25A	62887848	9433177200	150	96.84	36.55
18ZT331-27A	66289794	9943469100	150	96.56	36.75
18ZT331-28A	56428764	8464314600	150	95.99	37.38
18ZT331-29A	61721110	9258166500	150	96.3	37.53
18ZT331-30A	59460652	8919097800	150	96.41	36.89
18ZT331-31A	65469166	9820374900	150	96.46	36.91
18ZT331-32A	58667224	8800083600	150	96.9	37.29
18ZT331-33A	60035006	9005250900	150	97.08	37.85
18ZT331-34A	66562924	9984438600	150	96.74	37
18ZT331-35A	62788050	9418207500	150	96.74	39.43
18ZT331-36A	62940974	9441146100	150	96.51	37.44
18ZT332-46B	70844816	10626722400	150	97.02	37.59
18ZT332-44B	74066820	11110023000	150	97.46	37.48
18ZT327-12B	67813948	10172092200	150	97.27	36.39
18ZT327-24B	75296270	11294440500	150	96.97	37.49
18ZT333-42B	78229442	11734416300	150	97.49	37.47
18ZT333-46B	74385058	11157758700	150	97.39	36.35
18ZT330-12B	70655144	10598271600	150	96.98	40.46
18ZT330-14B	74711706	11206755900	150	97.22	36.53

## Sheet: Table S9
Table S9 The bin marker information and the genotype of the 200 individuals in F2 population
Group	Position (cM)	MarkerID	type	18ZT327-01A	18ZT327-02A	18ZT327-04A	18ZT327-05A	18ZT327-06A	18ZT327-07A	18ZT327-08A	18ZT327-11A	18ZT327-12B	18ZT327-13A	18ZT327-14A	18ZT327-15A	18ZT327-18A	18ZT327-19A	18ZT327-20A	18ZT327-21A	18ZT327-24B	18ZT327-26A	18ZT327-27A	18ZT327-28A	18ZT327-29A	18ZT327-30A	18ZT327-33A	18ZT327-34A	18ZT327-38A	18ZT327-40A	18ZT327-41A	18ZT330-01A	18ZT330-02A	18ZT330-03A	18ZT330-04A	18ZT330-06A	18ZT330-07A	18ZT330-08A	18ZT330-09A	18ZT330-10A	18ZT330-11A	18ZT330-12B	18ZT330-13A	18ZT330-14B	18ZT330-15A	18ZT330-16A	18ZT330-17A	18ZT330-18A	18ZT330-19A	18ZT330-20A
A01	0	Block146	aaxbb	ab	ab	ab	aa	aa	ab	ab	ab	ab	aa	ab	aa	aa	ab	ab	ab	aa	ab	ab	ab	ab	ab	ab	ab	ab	ab	aa	ab	ab	bb	aa	ab	ab	ab	bb	aa	ab	aa	ab	aa	bb	ab	ab	bb	bb	ab
A01	0.5	Block241	aaxbb	ab	ab	ab	aa	aa	ab	ab	ab	ab	aa	ab	aa	aa	ab	ab	ab	aa	ab	ab	ab	ab	ab	ab	ab	ab	ab	aa	ab	ab	bb	aa	ab	bb	ab	bb	aa	ab	aa	ab	aa	bb	ab	ab	bb	bb	ab
A01	1	Block128	aaxbb	ab	ab	ab	aa	aa	ab	ab	ab	ab	aa	ab	aa	aa	ab	ab	ab	aa	ab	ab	ab	ab	ab	ab	ab	ab	ab	aa	ab	ab	bb	aa	ab	bb	ab	bb	ab	ab	aa	ab	aa	bb	ab	ab	bb	bb	ab
A01	2.012	Block82	aaxbb	ab	ab	ab	aa	aa	ab	ab	ab	ab	aa	ab	aa	aa	ab	ab	ab	aa	ab	ab	ab	ab	ab	ab	ab	ab	ab	aa	ab	ab	bb	aa	ab	bb	ab	bb	ab	ab	aa	ab	aa	bb	ab	ab	bb	bb	ab
A01	2.262	Block129	aaxbb	ab	ab	ab	aa	aa	ab	ab	ab	ab	aa	ab	aa	aa	ab	ab	ab	aa	ab	ab	ab	ab	ab	ab	ab	ab	ab	aa	ab	ab	bb	aa	ab	bb	ab	bb	ab	ab	aa	ab	aa	bb	ab	ab	ab	bb	ab
A01	2.512	Block110	aaxbb	ab	ab	ab	aa	aa	ab	ab	ab	ab	aa	ab	aa	aa	ab	ab	ab	aa	ab	ab	ab	ab	ab	ab	ab	ab	ab	aa	ab	ab	bb	aa	ab	ab	ab	bb	ab	ab	aa	ab	aa	bb	ab	ab	ab	bb	ab
A01	2.512	Block135	aaxbb	ab	ab	ab	aa	aa	ab	ab	ab	ab	aa	ab	aa	aa	ab	ab	ab	aa	ab	ab	ab	ab	ab	ab	ab	ab	ab	aa	ab	ab	bb	aa	ab	ab	ab	bb	ab	ab	aa	ab	aa	bb	ab	ab	ab	bb	ab
A01	2.762	Block79	aaxbb	ab	ab	ab	aa	aa	ab	ab	ab	ab	aa	ab	aa	aa	ab	ab	ab	aa	ab	ab	ab	ab	ab	ab	ab	ab	ab	aa	ab	ab	bb	aa	ab	ab	ab	bb	ab	ab	aa	ab	aa	bb	ab	ab	aa	bb	ab
A01	3.267	Block71	aaxbb	ab	ab	ab	aa	aa	ab	ab	ab	ab	aa	ab	aa	aa	ab	ab	ab	aa	ab	ab	ab	ab	ab	ab	ab	ab	ab	aa	ab	ab	bb	aa	ab	ab	ab	bb	ab	ab	aa	ab	aa	bb	ab	ab	aa	bb	ab
A01	3.517	Block74	aaxbb	ab	ab	ab	aa	aa	ab	ab	ab	ab	aa	ab	aa	aa	ab	ab	ab	aa	ab	ab	ab	ab	ab	ab	ab	ab	ab	aa	ab	ab	bb	aa	ab	aa	ab	bb	ab	ab	aa	ab	aa	bb	ab	ab	aa	bb	ab
A01	3.517	Block70	aaxbb	ab	ab	ab	aa	aa	ab	ab	ab	ab	aa	ab	aa	aa	ab	ab	ab	aa	ab	ab	ab	ab	ab	ab	ab	ab	ab	aa	ab	ab	bb	aa	ab	aa	ab	bb	ab	ab	aa	ab	aa	bb	ab	ab	aa	bb	ab
A01	3.517	Block69	aaxbb	ab	ab	ab	aa	aa	ab	ab	ab	ab	aa	ab	aa	aa	ab	ab	ab	aa	ab	ab	ab	ab	ab	ab	ab	ab	ab	aa	ab	ab	bb	aa	ab	aa	ab	bb	ab	ab	aa	ab	aa	bb	ab	ab	aa	bb	ab
A01	3.517	Block84	aaxbb	ab	ab	ab	aa	aa	ab	ab	ab	ab	aa	ab	aa	aa	ab	ab	ab	aa	ab	ab	ab	ab	ab	ab	ab	ab	ab	aa	ab	ab	bb	aa	ab	aa	ab	bb	ab	ab	aa	ab	aa	bb	ab	ab	aa	bb	ab
A01	4.618	Block28	aaxbb	ab	ab	ab	aa	aa	ab	ab	ab	ab	aa	ab	aa	aa	ab	ab	ab	aa	ab	ab	ab	ab	ab	ab	ab	ab	ab	aa	ab	ab	bb	aa	ab	aa	ab	bb	ab	ab	aa	ab	aa	bb	ab	ab	aa	aa	ab
A01	5.22	Block72	aaxbb	ab	ab	ab	aa	aa	ab	ab	ab	ab	aa	ab	aa	aa	ab	ab	ab	aa	ab	ab	ab	ab	ab	ab	ab	ab	ab	aa	ab	ab	bb	aa	ab	aa	ab	bb	ab	ab	aa	ab	aa	bb	ab	ab	aa	bb	ab
A01	5.925	Block140	aaxbb	ab	ab	ab	aa	aa	ab	ab	ab	ab	aa	ab	aa	aa	ab	ab	ab	aa	ab	ab	ab	ab	ab	ab	ab	ab	ab	aa	ab	ab	bb	aa	ab	aa	ab	bb	ab	ab	aa	ab	aa	bb	ab	ab	aa	aa	ab
A01	7.225	Block285	aaxbb	ab	ab	ab	aa	aa	ab	ab	ab	ab	aa	ab	aa	aa	ab	ab	ab	aa	ab	ab	ab	aa	ab	ab	ab	ab	ab	aa	ab	ab	bb	aa	ab	aa	ab	bb	ab	ab	aa	ab	aa	bb	ab	ab	aa	aa	ab
A01	8.627	Block332	aaxbb	ab	ab	ab	aa	aa	ab	ab	ab	ab	aa	ab	aa	aa	ab	ab	ab	aa	ab	ab	ab	aa	ab	ab	ab	ab	ab	aa	ab	ab	bb	aa	ab	aa	ab	bb	ab	ab	aa	ab	aa	bb	ab	ab	aa	aa	ab
A01	9.377	Block280	aaxbb	ab	ab	ab	aa	aa	ab	ab	ab	ab	aa	ab	aa	aa	ab	ab	ab	aa	ab	ab	ab	aa	ab	ab	ab	ab	ab	aa	ab	ab	bb	aa	ab	aa	ab	bb	ab	ab	aa	ab	aa	bb	ab	ab	aa	aa	ab
A01	9.627	Block334	aaxbb	ab	ab	ab	aa	aa	ab	ab	ab	ab	aa	ab	aa	aa	ab	ab	ab	aa	ab	ab	ab	aa	ab	ab	ab	ab	ab	aa	ab	ab	bb	aa	ab	aa	ab	bb	ab	ab	aa	ab	aa	bb	ab	ab	aa	aa	ab
A01	20.516	Block344	aaxbb	ab	ab	bb	aa	aa	bb	ab	ab	ab	aa	bb	aa	aa	ab	ab	ab	aa	ab	ab	ab	aa	ab	ab	ab	ab	ab	ab	ab	ab	ab	aa	ab	aa	ab	bb	ab	ab	aa	ab	aa	aa	ab	ab	aa	aa	ab
A01	23.419	Block337	aaxbb	ab	ab	bb	aa	aa	bb	ab	ab	ab	aa	bb	aa	aa	ab	ab	ab	aa	ab	ab	ab	aa	ab	ab	ab	ab	ab	ab	ab	ab	ab	aa	ab	aa	ab	bb	ab	ab	aa	ab	aa	aa	ab	ab	aa	aa	ab
A01	25.771	Block395	aaxbb	ab	ab	bb	aa	aa	bb	ab	ab	ab	aa	bb	aa	aa	ab	ab	ab	aa	ab	aa	ab	aa	ab	ab	ab	ab	ab	ab	bb	ab	ab	aa	ab	aa	ab	bb	ab	ab	aa	ab	aa	aa	ab	ab	aa	aa	ab
A01	25.771	Block391	aaxbb	ab	ab	bb	aa	aa	bb	ab	ab	ab	aa	bb	aa	aa	ab	ab	ab	aa	ab	aa	ab	aa	ab	ab	ab	ab	ab	ab	bb	ab	ab	aa	ab	aa	ab	bb	ab	ab	aa	ab	aa	aa	ab	ab	aa	aa	ab
A01	25.771	Block364	aaxbb	ab	ab	bb	aa	aa	bb	ab	ab	ab	aa	bb	aa	aa	ab	ab	ab	aa	ab	aa	ab	aa	ab	ab	ab	ab	ab	ab	bb	ab	ab	aa	ab	aa	ab	bb	ab	ab	aa	ab	aa	aa	ab	ab	aa	aa	ab
A01	25.771	Block378	aaxbb	ab	ab	bb	aa	aa	bb	ab	ab	ab	aa	bb	aa	aa	ab	ab	ab	aa	ab	aa	ab	aa	ab	ab	ab	ab	ab	ab	bb	ab	ab	aa	ab	aa	ab	bb	ab	ab	aa	ab	aa	aa	ab	ab	aa	aa	ab
A01	25.771	Block373	aaxbb	ab	ab	bb	aa	aa	bb	ab	ab	ab	aa	bb	aa	aa	ab	ab	ab	aa	ab	aa	ab	aa	ab	ab	ab	ab	ab	ab	bb	ab	ab	aa	ab	aa	ab	bb	ab	ab	aa	ab	aa	aa	ab	ab	aa	aa	ab
A01	25.771	Block346	aaxbb	ab	ab	bb	aa	aa	bb	ab	ab	ab	aa	bb	aa	aa	ab	ab	ab	aa	ab	aa	ab	aa	ab	ab	ab	ab	ab	ab	bb	ab	ab	aa	ab	aa	ab	bb	ab	ab	aa	ab	aa	aa	ab	ab	aa	aa	ab
A01	25.771	Block367	aaxbb	ab	ab	bb	aa	aa	bb	ab	ab	ab	aa	bb	aa	aa	ab	ab	ab	aa	ab	aa	ab	aa	ab	ab	ab	ab	ab	ab	bb	ab	ab	aa	ab	aa	ab	bb	ab	ab	aa	ab	aa	aa	ab	ab	aa	aa	ab
A01	25.771	Block368	aaxbb	ab	ab	bb	aa	aa	bb	ab	ab	ab	aa	bb	aa	aa	ab	ab	ab	aa	ab	aa	ab	aa	ab	ab	ab	ab	ab	ab	bb	ab	ab	aa	ab	aa	ab	bb	ab	ab	aa	ab	aa	aa	ab	ab	aa	aa	ab
A01	25.771	Block348	aaxbb	ab	ab	bb	aa	aa	bb	ab	ab	ab	aa	bb	aa	aa	ab	ab	ab	aa	ab	aa	ab	aa	ab	ab	ab	ab	ab	ab	bb	ab	ab	aa	ab	aa	ab	bb	ab	ab	aa	ab	aa	aa	ab	ab	aa	aa	ab
A01	25.771	Block342	aaxbb	ab	ab	bb	aa	aa	bb	ab	ab	ab	aa	bb	aa	aa	ab	ab	ab	aa	ab	aa	ab	aa	ab	ab	ab	ab	ab	ab	bb	ab	ab	aa	ab	aa	ab	bb	ab	ab	aa	ab	aa	aa	ab	ab	aa	aa	ab
A01	25.771	Block379	aaxbb	ab	ab	bb	aa	aa	bb	ab	ab	ab	aa	bb	aa	aa	ab	ab	ab	aa	ab	aa	ab	aa	ab	ab	ab	ab	ab	ab	bb	ab	ab	aa	ab	aa	ab	bb	ab	ab	aa	ab	aa	aa	ab	ab	aa	aa	ab
A01	25.771	Block375	aaxbb	ab	ab	bb	aa	aa	bb	ab	ab	ab	aa	bb	aa	aa	ab	ab	ab	aa	ab	aa	ab	aa	ab	ab	ab	ab	ab	ab	bb	ab	ab	aa	ab	aa	ab	bb	ab	ab	aa	ab	aa	aa	ab	ab	aa	aa	ab
A01	25.771	Block339	aaxbb	ab	ab	bb	aa	aa	bb	ab	ab	ab	aa	bb	aa	aa	ab	ab	ab	aa	ab	aa	ab	aa	ab	ab	ab	ab	ab	ab	bb	ab	ab	aa	ab	aa	ab	bb	ab	ab	aa	ab	aa	aa	ab	ab	aa	aa	ab
A01	25.771	Block338	aaxbb	ab	ab	bb	aa	aa	bb	ab	ab	ab	aa	bb	aa	aa	ab	ab	ab	aa	ab	aa	ab	aa	ab	ab	ab	ab	ab	ab	bb	ab	ab	aa	ab	aa	ab	bb	ab	ab	aa	ab	aa	aa	ab	ab	aa	aa	ab
A01	26.021	Block397	aaxbb	ab	ab	bb	aa	aa	bb	ab	ab	ab	aa	bb	aa	aa	ab	ab	ab	aa	ab	aa	ab	aa	ab	ab	ab	ab	ab	ab	bb	ab	ab	aa	ab	aa	ab	bb	ab	ab	aa	ab	aa	aa	ab	ab	aa	aa	ab
A01	26.021	Block398	aaxbb	ab	ab	bb	aa	aa	bb	ab	ab	ab	aa	bb	aa	aa	ab	ab	ab	aa	ab	aa	ab	aa	ab	ab	ab	ab	ab	ab	bb	ab	ab	aa	ab	aa	ab	bb	ab	ab	aa	ab	aa	aa	ab	ab	aa	aa	ab
A01	26.271	Block415	aaxbb	ab	ab	bb	aa	aa	bb	ab	ab	ab	aa	bb	aa	aa	ab	ab	aa	aa	ab	aa	ab	aa	ab	ab	ab	ab	ab	ab	bb	ab	ab	aa	ab	aa	ab	bb	ab	ab	aa	ab	aa	aa	ab	ab	aa	aa	ab
A01	26.271	Block400	aaxbb	ab	ab	bb	aa	aa	bb	ab	ab	ab	aa	bb	aa	aa	ab	ab	aa	aa	ab	aa	ab	aa	ab	ab	ab	ab	ab	ab	bb	ab	ab	aa	ab	aa	ab	bb	ab	ab	aa	ab	aa	aa	ab	ab	aa	aa	ab
A01	26.521	Block416	aaxbb	ab	ab	bb	aa	aa	bb	ab	ab	ab	aa	bb	aa	aa	ab	ab	aa	aa	ab	aa	ab	aa	ab	ab	ab	ab	ab	ab	bb	ab	ab	aa	ab	aa	ab	bb	ab	ab	aa	ab	aa	aa	ab	ab	aa	aa	ab
A01	27.021	Block457	aaxbb	ab	ab	bb	aa	aa	bb	ab	ab	ab	aa	bb	aa	aa	ab	ab	aa	aa	ab	aa	ab	aa	ab	ab	ab	ab	ab	ab	bb	ab	ab	aa	ab	aa	ab	bb	ab	ab	aa	ab	aa	aa	ab	ab	aa	aa	ab
A01	27.021	Block458	aaxbb	ab	ab	bb	aa	aa	bb	ab	ab	ab	aa	bb	aa	aa	ab	ab	aa	aa	ab	aa	ab	aa	ab	ab	ab	ab	ab	ab	bb	ab	ab	aa	ab	aa	ab	bb	ab	ab	aa	ab	aa	aa	ab	ab	aa	aa	ab
A01	27.021	Block456	aaxbb	ab	ab	bb	aa	aa	bb	ab	ab	ab	aa	bb	aa	aa	ab	ab	aa	aa	ab	aa	ab	aa	ab	ab	ab	ab	ab	ab	bb	ab	ab	aa	ab	aa	ab	bb	ab	ab	aa	ab	aa	aa	ab	ab	aa	aa	ab
A01	27.271	Block420	aaxbb	ab	ab	bb	aa	aa	bb	ab	ab	ab	aa	bb	aa	aa	ab	ab	aa	aa	ab	aa	ab	aa	ab	ab	ab	ab	ab	ab	bb	ab	ab	aa	ab	aa	ab	bb	ab	ab	aa	ab	aa	aa	ab	ab	aa	aa	ab
A01	27.271	Block430	aaxbb	ab	ab	bb	aa	aa	bb	ab	ab	ab	aa	bb	aa	aa	ab	ab	aa	aa	ab	aa	ab	aa	ab	ab	ab	ab	ab	ab	bb	ab	ab	aa	ab	aa	ab	bb	ab	ab	aa	ab	aa	aa	ab	ab	aa	aa	ab
A01	27.271	Block431	aaxbb	ab	ab	bb	aa	aa	bb	ab	ab	ab	aa	bb	aa	aa	ab	ab	aa	aa	ab	aa	ab	aa	ab	ab	ab	ab	ab	ab	bb	ab	ab	aa	ab	aa	ab	bb	ab	ab	aa	ab	aa	aa	ab	ab	aa	aa	ab
A01	27.271	Block417	aaxbb	ab	ab	bb	aa	aa	bb	ab	ab	ab	aa	bb	aa	aa	ab	ab	aa	aa	ab	aa	ab	aa	ab	ab	ab	ab	ab	ab	bb	ab	ab	aa	ab	aa	ab	bb	ab	ab	aa	ab	aa	aa	ab	ab	aa	aa	ab
A01	27.771	Block511	aaxbb	ab	ab	bb	aa	aa	bb	ab	ab	ab	aa	bb	aa	aa	ab	ab	aa	aa	ab	aa	ab	aa	ab	ab	ab	ab	ab	ab	bb	ab	ab	aa	ab	aa	ab	bb	ab	ab	ab	ab	aa	aa	ab	ab	aa	aa	ab
A01	27.771	Block406	aaxbb	ab	ab	bb	aa	aa	bb	ab	ab	ab	aa	bb	aa	aa	ab	ab	aa	aa	ab	aa	ab	aa	ab	ab	ab	ab	ab	ab	bb	ab	ab	aa	ab	aa	ab	bb	ab	ab	ab	ab	aa	aa	ab	ab	aa	aa	ab
A01	27.771	Block426	aaxbb	ab	ab	bb	aa	aa	bb	ab	ab	ab	aa	bb	aa	aa	ab	ab	aa	aa	ab	aa	ab	aa	ab	ab	ab	ab	ab	ab	bb	ab	ab	aa	ab	aa	ab	bb	ab	ab	ab	ab	aa	aa	ab	ab	aa	aa	ab
A01	27.771	Block421	aaxbb	ab	ab	bb	aa	aa	bb	ab	ab	ab	aa	bb	aa	aa	ab	ab	aa	aa	ab	aa	ab	aa	ab	ab	ab	ab	ab	ab	bb	ab	ab	aa	ab	aa	ab	bb	ab	ab	ab	ab	aa	aa	ab	ab	aa	aa	ab
A01	28.021	Block514	aaxbb	ab	ab	bb	aa	aa	bb	ab	ab	ab	aa	bb	aa	aa	ab	ab	aa	aa	ab	aa	ab	aa	ab	ab	ab	ab	ab	ab	bb	ab	ab	aa	aa	aa	ab	bb	ab	ab	ab	ab	aa	aa	ab	ab	aa	aa	ab
A01	28.771	Block513	aaxbb	ab	ab	bb	aa	aa	bb	ab	ab	ab	aa	bb	aa	aa	ab	ab	aa	aa	ab	aa	aa	aa	ab	ab	ab	ab	ab	ab	bb	ab	ab	aa	aa	aa	ab	bb	ab	ab	ab	ab	aa	aa	ab	ab	aa	aa	ab
A01	28.771	Block512	aaxbb	ab	ab	bb	aa	aa	bb	ab	ab	ab	aa	bb	aa	aa	ab	ab	aa	aa	ab	aa	aa	aa	ab	ab	ab	ab	ab	ab	bb	ab	ab	aa	aa	aa	ab	bb	ab	ab	ab	ab	aa	aa	ab	ab	aa	aa	ab
A01	29.021	Block515	aaxbb	ab	ab	bb	aa	aa	bb	ab	ab	ab	aa	bb	aa	aa	ab	ab	aa	aa	ab	aa	aa	aa	ab	ab	ab	ab	ab	ab	bb	ab	ab	aa	aa	aa	ab	bb	ab	ab	ab	ab	aa	aa	ab	ab	aa	aa	ab
A01	29.021	Block519	aaxbb	ab	ab	bb	aa	aa	bb	ab	ab	ab	aa	bb	aa	aa	ab	ab	aa	aa	ab	aa	aa	aa	ab	ab	ab	ab	ab	ab	bb	ab	ab	aa	aa	aa	ab	bb	ab	ab	ab	ab	aa	aa	ab	ab	aa	aa	ab
A01	29.521	Block521	aaxbb	ab	ab	bb	aa	aa	bb	ab	ab	ab	aa	bb	aa	aa	ab	ab	aa	aa	ab	aa	aa	aa	ab	ab	ab	ab	ab	ab	bb	ab	ab	aa	aa	aa	ab	bb	ab	ab	ab	ab	aa	aa	ab	ab	aa	aa	ab
A01	29.771	Block726	aaxbb	ab	ab	bb	aa	aa	bb	ab	ab	ab	aa	bb	aa	aa	ab	ab	aa	aa	ab	aa	aa	aa	ab	ab	ab	ab	ab	ab	bb	ab	ab	aa	aa	aa	ab	bb	ab	ab	ab	ab	aa	aa	ab	ab	aa	ab	ab
A01	29.771	Block724	aaxbb	ab	ab	bb	aa	aa	bb	ab	ab	ab	aa	bb	aa	aa	ab	ab	aa	aa	ab	aa	aa	aa	ab	ab	ab	ab	ab	ab	bb	ab	ab	aa	aa	aa	ab	bb	ab	ab	ab	ab	aa	aa	ab	ab	aa	ab	ab
A01	30.021	Block564	aaxbb	ab	ab	bb	aa	aa	bb	ab	ab	ab	ab	bb	aa	aa	ab	ab	aa	aa	ab	aa	aa	aa	ab	ab	ab	ab	ab	ab	bb	ab	ab	aa	aa	aa	ab	bb	ab	ab	ab	ab	aa	aa	ab	ab	aa	ab	ab
A01	30.623	Block496	aaxbb	ab	ab	ab	aa	aa	bb	ab	ab	ab	ab	bb	aa	aa	ab	ab	aa	aa	ab	aa	aa	aa	ab	ab	ab	ab	ab	ab	bb	ab	ab	aa	aa	aa	ab	bb	ab	ab	ab	ab	aa	aa	ab	ab	aa	ab	ab
A01	34.329	Block468	aaxbb	ab	ab	ab	ab	aa	bb	ab	ab	ab	ab	bb	aa	aa	ab	ab	aa	aa	ab	ab	aa	aa	ab	ab	ab	ab	ab	ab	bb	ab	ab	aa	aa	aa	aa	bb	ab	ab	ab	ab	aa	aa	ab	ab	aa	ab	ab
A01	36.431	Block477	aaxbb	ab	ab	ab	ab	aa	bb	ab	ab	ab	ab	bb	aa	aa	ab	ab	aa	aa	ab	ab	aa	aa	ab	ab	ab	ab	ab	ab	ab	ab	ab	aa	aa	aa	aa	bb	ab	ab	ab	ab	aa	aa	ab	ab	aa	ab	ab
A01	38.884	Block486	aaxbb	ab	ab	ab	ab	aa	bb	ab	ab	ab	ab	bb	aa	aa	ab	ab	aa	aa	ab	ab	aa	aa	ab	ab	ab	ab	ab	ab	ab	ab	ab	ab	aa	aa	aa	bb	ab	ab	ab	ab	aa	aa	ab	ab	aa	ab	ab
A01	42.46	Block702	aaxbb	ab	ab	ab	ab	aa	ab	ab	ab	ab	ab	bb	aa	aa	ab	ab	aa	aa	ab	ab	aa	aa	ab	ab	ab	ab	ab	ab	ab	ab	ab	ab	aa	aa	aa	ab	ab	ab	ab	ab	aa	ab	ab	ab	aa	ab	ab
A01	44.216	Block787	aaxbb	ab	ab	ab	ab	aa	ab	ab	ab	ab	ab	bb	aa	aa	ab	ab	aa	aa	ab	ab	ab	aa	ab	ab	ab	ab	ab	ab	ab	ab	aa	ab	aa	aa	aa	ab	ab	ab	ab	ab	aa	ab	ab	ab	aa	ab	ab
A01	44.216	Block866	aaxbb	ab	ab	ab	ab	aa	ab	ab	ab	ab	ab	bb	aa	aa	ab	ab	aa	aa	ab	ab	ab	aa	ab	ab	ab	ab	ab	ab	ab	ab	aa	ab	aa	aa	aa	ab	ab	ab	ab	ab	aa	ab	ab	ab	aa	ab	ab
A01	47.522	Block893	aaxbb	ab	ab	ab	ab	aa	ab	ab	ab	ab	ab	ab	aa	aa	ab	ab	aa	aa	ab	ab	ab	aa	ab	ab	ab	ab	ab	ab	ab	ab	aa	ab	aa	aa	aa	ab	ab	ab	ab	ab	ab	ab	ab	ab	aa	ab	ab
A01	48.322	Block897	aaxbb	ab	ab	ab	ab	aa	ab	ab	ab	ab	ab	bb	ab	aa	ab	ab	aa	aa	ab	ab	ab	aa	ab	ab	ab	ab	ab	ab	ab	ab	aa	ab	aa	aa	aa	ab	ab	ab	ab	ab	ab	ab	ab	ab	aa	ab	ab
A01	50.474	Block766	aaxbb	ab	ab	ab	ab	aa	ab	ab	ab	ab	ab	bb	ab	aa	ab	ab	aa	aa	ab	ab	ab	aa	ab	ab	ab	ab	ab	ab	ab	ab	aa	ab	aa	ab	aa	ab	ab	ab	ab	ab	ab	ab	ab	ab	aa	ab	ab
A01	51.024	Block829	aaxbb	ab	ab	ab	ab	aa	ab	ab	ab	ab	ab	ab	ab	aa	ab	ab	ab	aa	ab	ab	ab	aa	ab	ab	ab	ab	ab	ab	ab	ab	aa	ab	aa	ab	aa	ab	ab	ab	ab	ab	ab	ab	ab	ab	aa	ab	ab
A01	52.624	Block648	aaxbb	ab	ab	ab	ab	aa	ab	ab	ab	ab	ab	ab	ab	aa	ab	ab	ab	aa	ab	ab	ab	aa	ab	ab	ab	ab	ab	ab	ab	ab	aa	ab	aa	ab	aa	ab	ab	ab	ab	ab	ab	ab	ab	ab	aa	ab	ab
A01	54.775	Block638	aaxbb	ab	ab	ab	ab	aa	ab	ab	ab	ab	ab	ab	ab	aa	ab	ab	ab	aa	ab	ab	ab	aa	ab	ab	ab	ab	ab	ab	ab	ab	aa	ab	aa	ab	aa	ab	ab	ab	aa	ab	ab	ab	ab	ab	aa	ab	ab
A01	57.028	Block575	aaxbb	ab	ab	ab	ab	aa	ab	ab	ab	ab	ab	ab	ab	aa	ab	ab	ab	aa	ab	ab	ab	aa	ab	ab	ab	ab	ab	ab	ab	ab	aa	ab	aa	ab	aa	ab	ab	ab	aa	ab	ab	ab	ab	ab	aa	ab	ab
A01	60.937	Block600	aaxbb	ab	ab	ab	ab	aa	ab	ab	ab	ab	ab	ab	ab	aa	ab	ab	aa	aa	ab	ab	ab	aa	ab	ab	ab	ab	ab	ab	ab	ab	aa	ab	aa	ab	aa	ab	ab	ab	aa	ab	ab	ab	ab	ab	aa	ab	ab
A01	61.289	Block607	aaxbb	ab	ab	ab	ab	aa	ab	ab	ab	ab	ab	bb	ab	aa	ab	ab	aa	aa	ab	ab	ab	aa	ab	ab	ab	ab	ab	ab	ab	ab	aa	ab	aa	ab	aa	ab	ab	ab	aa	ab	ab	ab	ab	ab	aa	ab	ab
A01	62.589	Block672	aaxbb	ab	ab	ab	ab	aa	ab	ab	ab	ab	ab	bb	ab	aa	ab	ab	aa	aa	ab	ab	ab	aa	ab	ab	ab	ab	ab	ab	ab	ab	aa	ab	aa	ab	aa	ab	ab	ab	aa	ab	ab	ab	ab	ab	aa	ab	ab
A02	0	Block1175	aaxbb	ab	aa	aa	ab	ab	ab	ab	aa	ab	ab	aa	ab	ab	ab	ab	ab	ab	ab	bb	ab	aa	ab	ab	aa	bb	ab	ab	ab	ab	ab	aa	aa	aa	ab	aa	ab	ab	ab	aa	aa	aa	aa	aa	aa	ab	ab
A02	1.562	Block1176	aaxbb	ab	ab	aa	ab	ab	ab	ab	aa	ab	ab	aa	ab	ab	ab	ab	ab	ab	ab	bb	ab	aa	ab	ab	aa	bb	ab	ab	ab	ab	ab	aa	aa	aa	ab	aa	ab	ab	ab	aa	aa	aa	aa	aa	aa	ab	ab
A02	8.915	Block1177	aaxbb	ab	ab	ab	ab	ab	ab	ab	aa	ab	ab	aa	ab	ab	ab	ab	ab	ab	ab	bb	ab	ab	ab	ab	ab	bb	ab	ab	ab	ab	ab	ab	aa	ab	ab	aa	ab	ab	ab	ab	ab	ab	ab	aa	ab	ab	ab
A02	9.266	Block1179	aaxbb	ab	ab	ab	ab	ab	ab	ab	aa	ab	ab	aa	ab	ab	ab	ab	ab	ab	ab	bb	ab	ab	ab	ab	ab	bb	ab	ab	ab	ab	ab	ab	aa	ab	ab	aa	ab	ab	ab	ab	ab	ab	ab	aa	ab	ab	ab
A02	10.167	Block1210	aaxbb	ab	ab	ab	ab	ab	ab	ab	aa	ab	ab	aa	ab	ab	ab	ab	ab	ab	ab	bb	ab	ab	ab	ab	ab	ab	ab	ab	ab	ab	ab	ab	aa	ab	ab	aa	ab	ab	ab	ab	ab	ab	ab	ab	ab	ab	ab
A02	10.167	Block1222	aaxbb	ab	ab	ab	ab	ab	ab	ab	aa	ab	ab	aa	ab	ab	ab	ab	ab	ab	ab	bb	ab	ab	ab	ab	ab	ab	ab	ab	ab	ab	ab	ab	aa	ab	ab	aa	ab	ab	ab	ab	ab	ab	ab	ab	ab	ab	ab
A02	10.167	Block1251	aaxbb	ab	ab	ab	ab	ab	ab	ab	aa	ab	ab	aa	ab	ab	ab	ab	ab	ab	ab	bb	ab	ab	ab	ab	ab	ab	ab	ab	ab	ab	ab	ab	aa	ab	ab	aa	ab	ab	ab	ab	ab	ab	ab	ab	ab	ab	ab
A02	10.167	Block1249	aaxbb	ab	ab	ab	ab	ab	ab	ab	aa	ab	ab	aa	ab	ab	ab	ab	ab	ab	ab	bb	ab	ab	ab	ab	ab	ab	ab	ab	ab	ab	ab	ab	aa	ab	ab	aa	ab	ab	ab	ab	ab	ab	ab	ab	ab	ab	ab
A02	10.418	Block1261	aaxbb	ab	ab	ab	ab	ab	ab	ab	aa	ab	ab	aa	ab	ab	ab	ab	ab	ab	ab	bb	ab	ab	ab	ab	ab	ab	ab	ab	ab	ab	ab	ab	aa	ab	ab	aa	ab	ab	ab	ab	ab	ab	ab	ab	ab	ab	ab
A02	10.77	Block1259	aaxbb	ab	ab	ab	ab	ab	ab	ab	aa	ab	ab	aa	ab	ab	ab	ab	ab	ab	ab	bb	ab	ab	ab	ab	ab	ab	ab	ab	ab	ab	ab	ab	aa	ab	ab	aa	ab	ab	ab	ab	ab	ab	ab	ab	ab	ab	ab
A02	11.371	Block1263	aaxbb	ab	ab	ab	ab	ab	ab	ab	aa	ab	ab	aa	ab	ab	ab	ab	ab	ab	ab	bb	ab	ab	ab	ab	ab	ab	ab	ab	ab	ab	ab	ab	aa	ab	ab	aa	ab	ab	ab	ab	ab	ab	ab	ab	ab	ab	ab
A02	11.921	Block1340	aaxbb	ab	ab	ab	ab	ab	ab	ab	ab	ab	ab	aa	ab	ab	ab	ab	ab	ab	ab	bb	ab	ab	ab	ab	ab	ab	ab	ab	ab	ab	ab	ab	ab	ab	ab	aa	ab	ab	ab	ab	ab	ab	ab	ab	ab	ab	ab
A02	13.923	Block1345	aaxbb	ab	ab	ab	ab	ab	ab	ab	ab	ab	ab	ab	ab	ab	ab	ab	ab	ab	ab	bb	ab	ab	ab	ab	ab	ab	ab	ab	ab	ab	ab	ab	ab	ab	ab	aa	ab	ab	ab	ab	ab	ab	ab	ab	ab	ab	ab
A02	14.723	Block1337	aaxbb	ab	ab	ab	ab	ab	ab	ab	ab	ab	ab	aa	ab	ab	ab	ab	ab	ab	ab	bb	ab	ab	ab	ab	ab	ab	ab	ab	ab	ab	ab	ab	ab	ab	ab	aa	ab	ab	ab	ab	ab	ab	ab	ab	ab	ab	ab
A02	18.631	Block1342	aaxbb	ab	ab	ab	ab	ab	ab	ab	ab	ab	ab	ab	ab	ab	ab	ab	ab	ab	ab	bb	ab	ab	ab	ab	ab	ab	ab	ab	ab	ab	ab	ab	ab	ab	ab	ab	ab	ab	ab	ab	ab	ab	ab	ab	ab	ab	ab
A02	19.431	Block1287	aaxbb	ab	ab	ab	ab	ab	ab	ab	ab	ab	ab	ab	ab	ab	ab	ab	ab	ab	ab	bb	ab	ab	ab	ab	ab	ab	ab	ab	ab	ab	ab	ab	ab	ab	ab	ab	ab	ab	ab	ab	ab	ab	ab	ab	ab	ab	ab
A02	19.681	Block1346	aaxbb	ab	ab	ab	ab	ab	ab	ab	ab	ab	ab	ab	ab	ab	ab	ab	ab	ab	ab	bb	ab	ab	ab	ab	ab	ab	ab	ab	ab	ab	ab	ab	ab	ab	ab	ab	ab	ab	ab	ab	ab	ab	ab	ab	ab	ab	ab
A02	20.782	Block1347	aaxbb	ab	ab	ab	ab	ab	ab	ab	ab	ab	ab	ab	ab	ab	ab	ab	ab	ab	ab	bb	ab	ab	ab	ab	ab	ab	ab	ab	ab	ab	ab	ab	ab	ab	ab	ab	ab	ab	ab	ab	ab	ab	ab	ab	ab	ab	ab
A02	20.782	Block1283	aaxbb	ab	ab	ab	ab	ab	ab	ab	ab	ab	ab	ab	ab	ab	ab	ab	ab	ab	ab	bb	ab	ab	ab	ab	ab	ab	ab	ab	ab	ab	ab	ab	ab	ab	ab	ab	ab	ab	ab	ab	ab	ab	ab	ab	ab	ab	ab
A02	20.782	Block1280	aaxbb	ab	ab	ab	ab	ab	ab	ab	ab	ab	ab	ab	ab	ab	ab	ab	ab	ab	ab	bb	ab	ab	ab	ab	ab	ab	ab	ab	ab	ab	ab	ab	ab	ab	ab	ab	ab	ab	ab	ab	ab	ab	ab	ab	ab	ab	ab
A02	21.882	Block1277	aaxbb	ab	ab	ab	ab	ab	ab	ab	ab	ab	ab	ab	ab	ab	ab	ab	ab	ab	ab	bb	ab	ab	ab	ab	ab	ab	ab	ab	ab	ab	ab	ab	ab	ab	ab	ab	ab	ab	ab	ab	ab	ab	ab	ab	ab	ab	ab
A02	22.132	Block1276	aaxbb	ab	ab	ab	ab	ab	ab	ab	ab	ab	ab	ab	ab	ab	ab	ab	ab	ab	ab	bb	ab	ab	ab	ab	ab	ab	ab	ab	ab	ab	ab	ab	ab	ab	ab	ab	ab	ab	ab	ab	ab	ab	ab	ab	ab	ab	ab
A02	22.132	Block1272	aaxbb	ab	ab	ab	ab	ab	ab	ab	ab	ab	ab	ab	ab	ab	ab	ab	ab	ab	ab	bb	ab	ab	ab	ab	ab	ab	ab	ab	ab	ab	ab	ab	ab	ab	ab	ab	ab	ab	ab	ab	ab	ab	ab	ab	ab	ab	ab
A02	22.382	Block1292	aaxbb	ab	ab	ab	ab	ab	ab	ab	ab	ab	ab	ab	ab	ab	ab	ab	ab	ab	ab	bb	ab	ab	ab	ab	ab	ab	ab	ab	ab	ab	ab	ab	ab	ab	ab	ab	ab	ab	ab	ab	ab	ab	ab	ab	ab	ab	ab
A02	22.382	Block1296	aaxbb	ab	ab	ab	ab	ab	ab	ab	ab	ab	ab	ab	ab	ab	ab	ab	ab	ab	ab	bb	ab	ab	ab	ab	ab	ab	ab	ab	ab	ab	ab	ab	ab	ab	ab	ab	ab	ab	ab	ab	ab	ab	ab	ab	ab	ab	ab
A02	23.732	Block1297	aaxbb	ab	ab	ab	ab	ab	ab	ab	ab	ab	ab	ab	ab	ab	ab	ab	ab	ab	ab	bb	ab	ab	ab	ab	ab	ab	ab	ab	ab	ab	ab	ab	ab	ab	ab	ab	ab	ab	ab	ab	ab	ab	ab	ab	ab	ab	ab
A02	24.633	Block1306	aaxbb	ab	ab	ab	ab	ab	ab	ab	ab	ab	ab	ab	ab	ab	ab	ab	ab	ab	ab	aa	ab	ab	ab	ab	ab	ab	ab	ab	ab	ab	ab	ab	ab	ab	ab	ab	ab	ab	ab	ab	ab	ab	ab	ab	ab	ab	ab
A02	25.183	Block1302	aaxbb	ab	ab	ab	ab	ab	ab	ab	ab	ab	ab	ab	ab	ab	ab	ab	ab	ab	ab	aa	ab	ab	aa	ab	ab	ab	ab	ab	ab	ab	ab	ab	ab	ab	ab	ab	ab	ab	ab	ab	ab	ab	ab	ab	ab	ab	ab
A02	26.534	Block1310	aaxbb	ab	ab	ab	ab	ab	ab	ab	ab	ab	ab	ab	ab	ab	ab	ab	ab	ab	ab	aa	ab	ab	aa	ab	ab	ab	ab	aa	ab	ab	ab	ab	ab	ab	bb	ab	ab	ab	ab	ab	ab	ab	ab	ab	ab	ab	ab
A02	26.784	Block1323	aaxbb	ab	ab	ab	ab	ab	ab	ab	aa	ab	ab	ab	ab	ab	ab	ab	ab	ab	ab	aa	ab	ab	aa	ab	ab	ab	ab	aa	ab	ab	ab	ab	ab	ab	bb	ab	ab	ab	ab	ab	ab	ab	ab	ab	ab	ab	ab
A02	30.641	Block1318	aaxbb	aa	ab	aa	ab	ab	ab	aa	aa	ab	ab	aa	ab	ab	aa	ab	ab	ab	ab	aa	aa	ab	aa	ab	ab	ab	ab	aa	ab	ab	ab	aa	ab	ab	bb	ab	ab	ab	ab	ab	ab	ab	ab	ab	ab	ab	aa
A02	37.994	Block1353	aaxbb	aa	ab	aa	aa	ab	aa	aa	aa	aa	aa	aa	ab	ab	aa	aa	aa	aa	aa	aa	aa	ab	aa	ab	ab	aa	aa	aa	ab	ab	ab	aa	ab	ab	bb	aa	ab	ab	ab	ab	ab	ab	ab	ab	ab	ab	aa
A02	42.557	Block1427	aaxbb	aa	ab	aa	aa	aa	aa	aa	aa	aa	aa	aa	aa	aa	aa	aa	aa	aa	aa	aa	aa	aa	aa	aa	aa	aa	aa	aa	ab	ab	ab	aa	aa	ab	bb	aa	ab	ab	ab	ab	ab	ab	aa	ab	ab	ab	aa
A02	47.018	Block1424	aaxbb	aa	ab	aa	aa	aa	aa	aa	aa	aa	aa	aa	aa	aa	aa	aa	aa	aa	aa	aa	aa	aa	aa	aa	aa	aa	aa	aa	ab	ab	ab	aa	aa	aa	bb	aa	ab	ab	ab	ab	bb	ab	aa	ab	ab	ab	aa
A02	47.268	Block1374	aaxbb	aa	aa	aa	aa	aa	aa	aa	aa	aa	aa	aa	aa	aa	aa	aa	aa	aa	aa	aa	aa	aa	aa	aa	aa	aa	aa	aa	ab	ab	ab	aa	aa	aa	bb	aa	ab	ab	ab	ab	bb	ab	aa	ab	ab	ab	aa
A02	47.268	Block1382	aaxbb	aa	aa	aa	aa	aa	aa	aa	aa	aa	aa	aa	aa	aa	aa	aa	aa	aa	aa	aa	aa	aa	aa	aa	aa	aa	aa	aa	ab	ab	ab	aa	aa	aa	bb	aa	ab	ab	ab	ab	bb	ab	aa	ab	ab	ab	aa
A02	47.518	Block1386	aaxbb	aa	aa	aa	aa	aa	aa	aa	aa	aa	aa	aa	aa	aa	aa	aa	aa	aa	aa	aa	aa	aa	aa	aa	aa	aa	aa	aa	ab	ab	ab	aa	aa	aa	bb	aa	ab	ab	ab	ab	bb	ab	aa	ab	ab	ab	aa
A02	47.518	Block1401	aaxbb	aa	aa	aa	aa	aa	aa	aa	aa	aa	aa	aa	aa	aa	aa	aa	aa	aa	aa	aa	aa	aa	aa	aa	aa	aa	aa	aa	ab	ab	ab	aa	aa	aa	bb	aa	ab	ab	ab	ab	bb	ab	aa	ab	ab	ab	aa
A02	47.518	Block1454	aaxbb	aa	aa	aa	aa	aa	aa	aa	aa	aa	aa	aa	aa	aa	aa	aa	aa	aa	aa	aa	aa	aa	aa	aa	aa	aa	aa	aa	ab	ab	ab	aa	aa	aa	bb	aa	ab	ab	ab	ab	bb	ab	aa	ab	ab	ab	aa
A02	47.768	Block1426	aaxbb	aa	aa	aa	aa	aa	aa	aa	aa	aa	aa	aa	aa	aa	aa	aa	aa	aa	aa	aa	aa	aa	aa	aa	aa	aa	aa	aa	ab	ab	ab	aa	aa	aa	bb	aa	aa	ab	ab	ab	bb	ab	aa	ab	ab	ab	aa
A02	47.768	Block1359	aaxbb	aa	aa	aa	aa	aa	aa	aa	aa	aa	aa	aa	aa	aa	aa	aa	aa	aa	aa	aa	aa	aa	aa	aa	aa	aa	aa	aa	ab	ab	ab	aa	aa	aa	bb	aa	aa	ab	ab	ab	bb	ab	aa	ab	ab	ab	aa
A02	47.768	Block1356	aaxbb	aa	aa	aa	aa	aa	aa	aa	aa	aa	aa	aa	aa	aa	aa	aa	aa	aa	aa	aa	aa	aa	aa	aa	aa	aa	aa	aa	ab	ab	ab	aa	aa	aa	bb	aa	aa	ab	ab	ab	bb	ab	aa	ab	ab	ab	aa
A02	47.768	Block1376	aaxbb	aa	aa	aa	aa	aa	aa	aa	aa	aa	aa	aa	aa	aa	aa	aa	aa	aa	aa	aa	aa	aa	aa	aa	aa	aa	aa	aa	ab	ab	ab	aa	aa	aa	bb	aa	aa	ab	ab	ab	bb	ab	aa	ab	ab	ab	aa
A02	47.768	Block1388	aaxbb	aa	aa	aa	aa	aa	aa	aa	aa	aa	aa	aa	aa	aa	aa	aa	aa	aa	aa	aa	aa	aa	aa	aa	aa	aa	aa	aa	ab	ab	ab	aa	aa	aa	bb	aa	aa	ab	ab	ab	bb	ab	aa	ab	ab	ab	aa
A02	47.768	Block1385	aaxbb	aa	aa	aa	aa	aa	aa	aa	aa	aa	aa	aa	aa	aa	aa	aa	aa	aa	aa	aa	aa	aa	aa	aa	aa	aa	aa	aa	ab	ab	ab	aa	aa	aa	bb	aa	aa	ab	ab	ab	bb	ab	aa	ab	ab	ab	aa
A02	47.768	Block1387	aaxbb	aa	aa	aa	aa	aa	aa	aa	aa	aa	aa	aa	aa	aa	aa	aa	aa	aa	aa	aa	aa	aa	aa	aa	aa	aa	aa	aa	ab	ab	ab	aa	aa	aa	bb	aa	aa	ab	ab	ab	bb	ab	aa	ab	ab	ab	aa
A02	47.768	Block1393	aaxbb	aa	aa	aa	aa	aa	aa	aa	aa	aa	aa	aa	aa	aa	aa	aa	aa	aa	aa	aa	aa	aa	aa	aa	aa	aa	aa	aa	ab	ab	ab	aa	aa	aa	bb	aa	aa	ab	ab	ab	bb	ab	aa	ab	ab	ab	aa
A02	47.768	Block1409	aaxbb	aa	aa	aa	aa	aa	aa	aa	aa	aa	aa	aa	aa	aa	aa	aa	aa	aa	aa	aa	aa	aa	aa	aa	aa	aa	aa	aa	ab	ab	ab	aa	aa	aa	bb	aa	aa	ab	ab	ab	bb	ab	aa	ab	ab	ab	aa
A02	47.768	Block1394	aaxbb	aa	aa	aa	aa	aa	aa	aa	aa	aa	aa	aa	aa	aa	aa	aa	aa	aa	aa	aa	aa	aa	aa	aa	aa	aa	aa	aa	ab	ab	ab	aa	aa	aa	bb	aa	aa	ab	ab	ab	bb	ab	aa	ab	ab	ab	aa
A02	47.768	Block1460	aaxbb	aa	aa	aa	aa	aa	aa	aa	aa	aa	aa	aa	aa	aa	aa	aa	aa	aa	aa	aa	aa	aa	aa	aa	aa	aa	aa	aa	ab	ab	ab	aa	aa	aa	bb	aa	aa	ab	ab	ab	bb	ab	aa	ab	ab	ab	aa
A02	47.768	Block1463	aaxbb	aa	aa	aa	aa	aa	aa	aa	aa	aa	aa	aa	aa	aa	aa	aa	aa	aa	aa	aa	aa	aa	aa	aa	aa	aa	aa	aa	ab	ab	ab	aa	aa	aa	bb	aa	aa	ab	ab	ab	bb	ab	aa	ab	ab	ab	aa
A02	47.768	Block1408	aaxbb	aa	aa	aa	aa	aa	aa	aa	aa	aa	aa	aa	aa	aa	aa	aa	aa	aa	aa	aa	aa	aa	aa	aa	aa	aa	aa	aa	ab	ab	ab	aa	aa	aa	bb	aa	aa	ab	ab	ab	bb	ab	aa	ab	ab	ab	aa
A02	47.768	Block1433	aaxbb	aa	aa	aa	aa	aa	aa	aa	aa	aa	aa	aa	aa	aa	aa	aa	aa	aa	aa	aa	aa	aa	aa	aa	aa	aa	aa	aa	ab	ab	ab	aa	aa	aa	bb	aa	aa	ab	ab	ab	bb	ab	aa	ab	ab	ab	aa
A02	47.768	Block1411	aaxbb	aa	aa	aa	aa	aa	aa	aa	aa	aa	aa	aa	aa	aa	aa	aa	aa	aa	aa	aa	aa	aa	aa	aa	aa	aa	aa	aa	ab	ab	ab	aa	aa	aa	bb	aa	aa	ab	ab	ab	bb	ab	aa	ab	ab	ab	aa
A02	47.768	Block1396	aaxbb	aa	aa	aa	aa	aa	aa	aa	aa	aa	aa	aa	aa	aa	aa	aa	aa	aa	aa	aa	aa	aa	aa	aa	aa	aa	aa	aa	ab	ab	ab	aa	aa	aa	bb	aa	aa	ab	ab	ab	bb	ab	aa	ab	ab	ab	aa
A02	47.768	Block1400	aaxbb	aa	aa	aa	aa	aa	aa	aa	aa	aa	aa	aa	aa	aa	aa	aa	aa	aa	aa	aa	aa	aa	aa	aa	aa	aa	aa	aa	ab	ab	ab	aa	aa	aa	bb	aa	aa	ab	ab	ab	bb	ab	aa	ab	ab	ab	aa
A02	47.768	Block1423	aaxbb	aa	aa	aa	aa	aa	aa	aa	aa	aa	aa	aa	aa	aa	aa	aa	aa	aa	aa	aa	aa	aa	aa	aa	aa	aa	aa	aa	ab	ab	ab	aa	aa	aa	bb	aa	aa	ab	ab	ab	bb	ab	aa	ab	ab	ab	aa
A02	47.768	Block1447	aaxbb	aa	aa	aa	aa	aa	aa	aa	aa	aa	aa	aa	aa	aa	aa	aa	aa	aa	aa	aa	aa	aa	aa	aa	aa	aa	aa	aa	ab	ab	ab	aa	aa	aa	bb	aa	aa	ab	ab	ab	bb	ab	aa	ab	ab	ab	aa
A02	47.768	Block1413	aaxbb	aa	aa	aa	aa	aa	aa	aa	aa	aa	aa	aa	aa	aa	aa	aa	aa	aa	aa	aa	aa	aa	aa	aa	aa	aa	aa	aa	ab	ab	ab	aa	aa	aa	bb	aa	aa	ab	ab	ab	bb	ab	aa	ab	ab	ab	aa
A02	47.768	Block1466	aaxbb	aa	aa	aa	aa	aa	aa	aa	aa	aa	aa	aa	aa	aa	aa	aa	aa	aa	aa	aa	aa	aa	aa	aa	aa	aa	aa	aa	ab	ab	ab	aa	aa	aa	bb	aa	aa	ab	ab	ab	bb	ab	aa	ab	ab	ab	aa
A02	48.018	Block1383	aaxbb	aa	aa	aa	aa	aa	aa	aa	aa	aa	aa	aa	aa	aa	aa	aa	aa	aa	aa	aa	aa	aa	aa	aa	aa	aa	aa	aa	ab	ab	ab	aa	ab	aa	bb	aa	aa	ab	ab	ab	bb	ab	aa	ab	ab	ab	aa
A02	48.018	Block1434	aaxbb	aa	aa	aa	aa	aa	aa	aa	aa	aa	aa	aa	aa	aa	aa	aa	aa	aa	aa	aa	aa	aa	aa	aa	aa	aa	aa	aa	ab	ab	ab	aa	ab	aa	bb	aa	aa	ab	ab	ab	bb	ab	aa	ab	ab	ab	aa
A02	48.018	Block1451	aaxbb	aa	aa	aa	aa	aa	aa	aa	aa	aa	aa	aa	aa	aa	aa	aa	aa	aa	aa	aa	aa	aa	aa	aa	aa	aa	aa	aa	ab	ab	ab	aa	ab	aa	bb	aa	aa	ab	ab	ab	bb	ab	aa	ab	ab	ab	aa
A02	48.018	Block1467	aaxbb	aa	aa	aa	aa	aa	aa	aa	aa	aa	aa	aa	aa	aa	aa	aa	aa	aa	aa	aa	aa	aa	aa	aa	aa	aa	aa	aa	ab	ab	ab	aa	ab	aa	bb	aa	aa	ab	ab	ab	bb	ab	aa	ab	ab	ab	aa
A02	48.268	Block1465	aaxbb	aa	aa	aa	aa	aa	aa	aa	aa	aa	aa	aa	aa	aa	aa	aa	aa	aa	aa	aa	aa	aa	aa	aa	aa	aa	aa	aa	ab	ab	ab	aa	ab	aa	bb	aa	aa	ab	ab	ab	bb	ab	aa	ab	ab	ab	aa
A02	48.268	Block1450	aaxbb	aa	aa	aa	aa	aa	aa	aa	aa	aa	aa	aa	aa	aa	aa	aa	aa	aa	aa	aa	aa	aa	aa	aa	aa	aa	aa	aa	ab	ab	ab	aa	ab	aa	bb	aa	aa	ab	ab	ab	bb	ab	aa	ab	ab	ab	aa
A02	48.268	Block1471	aaxbb	aa	aa	aa	aa	aa	aa	aa	aa	aa	aa	aa	aa	aa	aa	aa	aa	aa	aa	aa	aa	aa	aa	aa	aa	aa	aa	aa	ab	ab	ab	aa	ab	aa	bb	aa	aa	ab	ab	ab	bb	ab	aa	ab	ab	ab	aa
A02	48.518	Block1487	aaxbb	aa	aa	aa	aa	aa	aa	aa	aa	aa	aa	aa	aa	aa	aa	aa	aa	aa	aa	aa	aa	aa	aa	aa	aa	aa	aa	aa	ab	ab	ab	aa	ab	aa	bb	aa	aa	ab	ab	ab	bb	ab	aa	ab	ab	ab	aa
A02	48.768	Block1500	aaxbb	aa	aa	aa	aa	aa	aa	aa	aa	aa	aa	aa	aa	aa	aa	aa	aa	aa	aa	aa	aa	aa	aa	aa	aa	aa	aa	aa	ab	ab	ab	aa	ab	aa	bb	aa	aa	ab	ab	ab	bb	ab	aa	ab	ab	ab	aa
A02	49.018	Block1484	aaxbb	aa	aa	aa	aa	aa	aa	aa	aa	aa	aa	aa	aa	aa	aa	aa	aa	aa	aa	aa	aa	aa	aa	aa	aa	aa	aa	aa	ab	ab	ab	aa	ab	aa	bb	aa	aa	ab	aa	ab	bb	ab	aa	ab	ab	ab	aa
A02	49.268	Block1497	aaxbb	aa	aa	aa	aa	aa	aa	aa	aa	aa	aa	aa	aa	aa	aa	aa	aa	aa	aa	aa	aa	aa	aa	aa	aa	aa	aa	aa	ab	ab	ab	aa	ab	aa	bb	aa	aa	ab	aa	ab	bb	ab	aa	ab	ab	ab	aa
A02	49.268	Block1496	aaxbb	aa	aa	aa	aa	aa	aa	aa	aa	aa	aa	aa	aa	aa	aa	aa	aa	aa	aa	aa	aa	aa	aa	aa	aa	aa	aa	aa	ab	ab	ab	aa	ab	aa	bb	aa	aa	ab	aa	ab	bb	ab	aa	ab	ab	ab	aa
A02	49.268	Block1498	aaxbb	aa	aa	aa	aa	aa	aa	aa	aa	aa	aa	aa	aa	aa	aa	aa	aa	aa	aa	aa	aa	aa	aa	aa	aa	aa	aa	aa	ab	ab	ab	aa	ab	aa	bb	aa	aa	ab	aa	ab	bb	ab	aa	ab	ab	ab	aa
A02	49.268	Block1486	aaxbb	aa	aa	aa	aa	aa	aa	aa	aa	aa	aa	aa	aa	aa	aa	aa	aa	aa	aa	aa	aa	aa	aa	aa	aa	aa	aa	aa	ab	ab	ab	aa	ab	aa	bb	aa	aa	ab	aa	ab	bb	ab	aa	ab	ab	ab	aa
A02	49.268	Block1478	aaxbb	aa	aa	aa	aa	aa	aa	aa	aa	aa	aa	aa	aa	aa	aa	aa	aa	aa	aa	aa	aa	aa	aa	aa	aa	aa	aa	aa	ab	ab	ab	aa	ab	aa	bb	aa	aa	ab	aa	ab	bb	ab	aa	ab	ab	ab	aa
A02	49.268	Block1472	aaxbb	aa	aa	aa	aa	aa	aa	aa	aa	aa	aa	aa	aa	aa	aa	aa	aa	aa	aa	aa	aa	aa	aa	aa	aa	aa	aa	aa	ab	ab	ab	aa	ab	aa	bb	aa	aa	ab	aa	ab	bb	ab	aa	ab	ab	ab	aa
A02	49.518	Block1477	aaxbb	aa	aa	aa	aa	aa	aa	aa	aa	aa	aa	aa	aa	aa	aa	aa	aa	aa	aa	aa	aa	aa	aa	aa	aa	aa	aa	aa	ab	ab	ab	aa	ab	aa	bb	aa	aa	ab	aa	ab	bb	ab	aa	ab	ab	ab	aa
A02	49.518	Block1475	aaxbb	aa	aa	aa	aa	aa	aa	aa	aa	aa	aa	aa	aa	aa	aa	aa	aa	aa	aa	aa	aa	aa	aa	aa	aa	aa	aa	aa	ab	ab	ab	aa	ab	aa	bb	aa	aa	ab	aa	ab	bb	ab	aa	ab	ab	ab	aa
A02	49.518	Block1483	aaxbb	aa	aa	aa	aa	aa	aa	aa	aa	aa	aa	aa	aa	aa	aa	aa	aa	aa	aa	aa	aa	aa	aa	aa	aa	aa	aa	aa	ab	ab	ab	aa	ab	aa	bb	aa	aa	ab	aa	ab	bb	ab	aa	ab	ab	ab	aa
A02	49.518	Block1510	aaxbb	aa	aa	aa	aa	aa	aa	aa	aa	aa	aa	aa	aa	aa	aa	aa	aa	aa	aa	aa	aa	aa	aa	aa	aa	aa	aa	aa	ab	ab	ab	aa	ab	aa	bb	aa	aa	ab	aa	ab	bb	ab	aa	ab	ab	ab	aa
A02	49.768	Block1469	aaxbb	aa	aa	aa	aa	aa	aa	aa	aa	aa	aa	aa	aa	aa	aa	aa	aa	aa	aa	aa	aa	aa	aa	aa	aa	aa	aa	aa	ab	ab	ab	aa	ab	ab	bb	aa	aa	ab	aa	ab	bb	ab	aa	ab	ab	ab	aa
A02	49.768	Block1470	aaxbb	aa	aa	aa	aa	aa	aa	aa	aa	aa	aa	aa	aa	aa	aa	aa	aa	aa	aa	aa	aa	aa	aa	aa	aa	aa	aa	aa	ab	ab	ab	aa	ab	ab	bb	aa	aa	ab	aa	ab	bb	ab	aa	ab	ab	ab	aa
A02	49.768	Block1532	aaxbb	aa	aa	aa	aa	aa	aa	aa	aa	aa	aa	aa	aa	aa	aa	aa	aa	aa	aa	aa	aa	aa	aa	aa	aa	aa	aa	aa	ab	ab	ab	aa	ab	ab	bb	aa	aa	ab	aa	ab	bb	ab	aa	ab	ab	ab	aa
A02	50.018	Block1502	aaxbb	aa	aa	aa	aa	aa	aa	aa	aa	aa	aa	aa	aa	aa	aa	aa	aa	aa	aa	aa	aa	aa	aa	aa	aa	aa	aa	aa	ab	ab	ab	aa	ab	ab	bb	aa	aa	ab	aa	ab	bb	ab	aa	ab	ab	ab	aa
A02	50.018	Block1504	aaxbb	aa	aa	aa	aa	aa	aa	aa	aa	aa	aa	aa	aa	aa	aa	aa	aa	aa	aa	aa	aa	aa	aa	aa	aa	aa	aa	aa	ab	ab	ab	aa	ab	ab	bb	aa	aa	ab	aa	ab	bb	ab	aa	ab	ab	ab	aa
A02	50.018	Block1525	aaxbb	aa	aa	aa	aa	aa	aa	aa	aa	aa	aa	aa	aa	aa	aa	aa	aa	aa	aa	aa	aa	aa	aa	aa	aa	aa	aa	aa	ab	ab	ab	aa	ab	ab	bb	aa	aa	ab	aa	ab	bb	ab	aa	ab	ab	ab	aa
A02	50.268	Block1530	aaxbb	aa	aa	aa	aa	aa	aa	aa	aa	aa	aa	aa	aa	aa	aa	aa	aa	aa	aa	aa	aa	aa	aa	aa	aa	aa	aa	aa	ab	ab	ab	aa	ab	ab	bb	aa	aa	ab	aa	ab	bb	ab	aa	ab	ab	ab	aa
A02	50.268	Block1528	aaxbb	aa	aa	aa	aa	aa	aa	aa	aa	aa	aa	aa	aa	aa	aa	aa	aa	aa	aa	aa	aa	aa	aa	aa	aa	aa	aa	aa	ab	ab	ab	aa	ab	ab	bb	aa	aa	ab	aa	ab	bb	ab	aa	ab	ab	ab	aa
A02	50.268	Block1522	aaxbb	aa	aa	aa	aa	aa	aa	aa	aa	aa	aa	aa	aa	aa	aa	aa	aa	aa	aa	aa	aa	aa	aa	aa	aa	aa	aa	aa	ab	ab	ab	aa	ab	ab	bb	aa	aa	ab	aa	ab	bb	ab	aa	ab	ab	ab	aa
A02	50.518	Block1527	aaxbb	aa	aa	aa	aa	aa	aa	aa	aa	aa	aa	aa	aa	aa	aa	aa	aa	aa	aa	aa	aa	aa	aa	aa	aa	aa	aa	aa	ab	ab	ab	aa	aa	ab	bb	aa	aa	ab	aa	ab	bb	ab	aa	ab	ab	ab	aa
A02	50.518	Block1558	aaxbb	aa	aa	aa	aa	aa	aa	aa	aa	aa	aa	aa	aa	aa	aa	aa	aa	aa	aa	aa	aa	aa	aa	aa	aa	aa	aa	aa	ab	ab	ab	aa	aa	ab	bb	aa	aa	ab	aa	ab	bb	ab	aa	ab	ab	ab	aa
A02	50.768	Block1506	aaxbb	aa	aa	aa	aa	aa	aa	aa	aa	aa	aa	aa	aa	aa	aa	aa	aa	aa	aa	aa	aa	aa	aa	aa	aa	aa	aa	aa	ab	ab	ab	aa	aa	ab	bb	aa	aa	ab	aa	ab	bb	ab	aa	ab	ab	ab	aa
A02	50.768	Block1512	aaxbb	aa	aa	aa	aa	aa	aa	aa	aa	aa	aa	aa	aa	aa	aa	aa	aa	aa	aa	aa	aa	aa	aa	aa	aa	aa	aa	aa	ab	ab	ab	aa	aa	ab	bb	aa	aa	ab	aa	ab	bb	ab	aa	ab	ab	ab	aa
A02	50.768	Block1545	aaxbb	aa	aa	aa	aa	aa	aa	aa	aa	aa	aa	aa	aa	aa	aa	aa	aa	aa	aa	aa	aa	aa	aa	aa	aa	aa	aa	aa	ab	ab	ab	aa	aa	ab	bb	aa	aa	ab	aa	ab	bb	ab	aa	ab	ab	ab	aa
A02	51.018	Block1556	aaxbb	aa	aa	aa	aa	aa	aa	aa	aa	aa	aa	aa	aa	aa	aa	aa	aa	aa	aa	aa	aa	aa	aa	aa	aa	aa	aa	aa	ab	ab	ab	aa	aa	ab	bb	aa	aa	ab	aa	ab	bb	ab	aa	ab	ab	ab	aa
A02	51.018	Block1544	aaxbb	aa	aa	aa	aa	aa	aa	aa	aa	aa	aa	aa	aa	aa	aa	aa	aa	aa	aa	aa	aa	aa	aa	aa	aa	aa	aa	aa	ab	ab	ab	aa	aa	ab	bb	aa	aa	ab	aa	ab	bb	ab	aa	ab	ab	ab	aa
A02	51.268	Block1570	aaxbb	aa	aa	aa	aa	aa	aa	aa	aa	aa	aa	aa	aa	aa	aa	aa	aa	aa	aa	aa	aa	aa	aa	aa	aa	aa	aa	aa	ab	ab	ab	aa	aa	ab	bb	aa	aa	ab	aa	ab	bb	ab	aa	ab	ab	ab	aa
A02	51.268	Block1569	aaxbb	aa	aa	aa	aa	aa	aa	aa	aa	aa	aa	aa	aa	aa	aa	aa	aa	aa	aa	aa	aa	aa	aa	aa	aa	aa	aa	aa	ab	ab	ab	aa	aa	ab	bb	aa	aa	ab	aa	ab	bb	ab	aa	ab	ab	ab	aa
A02	51.268	Block1571	aaxbb	aa	aa	aa	aa	aa	aa	aa	aa	aa	aa	aa	aa	aa	aa	aa	aa	aa	aa	aa	aa	aa	aa	aa	aa	aa	aa	aa	ab	ab	ab	aa	aa	ab	bb	aa	aa	ab	aa	ab	bb	ab	aa	ab	ab	ab	aa
A02	51.268	Block1573	aaxbb	aa	aa	aa	aa	aa	aa	aa	aa	aa	aa	aa	aa	aa	aa	aa	aa	aa	aa	aa	aa	aa	aa	aa	aa	aa	aa	aa	ab	ab	ab	aa	aa	ab	bb	aa	aa	ab	aa	ab	bb	ab	aa	ab	ab	ab	aa
A02	51.268	Block1572	aaxbb	aa	aa	aa	aa	aa	aa	aa	aa	aa	aa	aa	aa	aa	aa	aa	aa	aa	aa	aa	aa	aa	aa	aa	aa	aa	aa	aa	ab	ab	ab	aa	aa	ab	bb	aa	aa	ab	aa	ab	bb	ab	aa	ab	ab	ab	aa
A02	51.268	Block1567	aaxbb	aa	aa	aa	aa	aa	aa	aa	aa	aa	aa	aa	aa	aa	aa	aa	aa	aa	aa	aa	aa	aa	aa	aa	aa	aa	aa	aa	ab	ab	ab	aa	aa	ab	bb	aa	aa	ab	aa	ab	bb	ab	aa	ab	ab	ab	aa
A02	51.268	Block1575	aaxbb	aa	aa	aa	aa	aa	aa	aa	aa	aa	aa	aa	aa	aa	aa	aa	aa	aa	aa	aa	aa	aa	aa	aa	aa	aa	aa	aa	ab	ab	ab	aa	aa	ab	bb	aa	aa	ab	aa	ab	bb	ab	aa	ab	ab	ab	aa
A02	51.268	Block1576	aaxbb	aa	aa	aa	aa	aa	aa	aa	aa	aa	aa	aa	aa	aa	aa	aa	aa	aa	aa	aa	aa	aa	aa	aa	aa	aa	aa	aa	ab	ab	ab	aa	aa	ab	bb	aa	aa	ab	aa	ab	bb	ab	aa	ab	ab	ab	aa
A02	51.268	Block1534	aaxbb	aa	aa	aa	aa	aa	aa	aa	aa	aa	aa	aa	aa	aa	aa	aa	aa	aa	aa	aa	aa	aa	aa	aa	aa	aa	aa	aa	ab	ab	ab	aa	aa	ab	bb	aa	aa	ab	aa	ab	bb	ab	aa	ab	ab	ab	aa
A02	51.268	Block1539	aaxbb	aa	aa	aa	aa	aa	aa	aa	aa	aa	aa	aa	aa	aa	aa	aa	aa	aa	aa	aa	aa	aa	aa	aa	aa	aa	aa	aa	ab	ab	ab	aa	aa	ab	bb	aa	aa	ab	aa	ab	bb	ab	aa	ab	ab	ab	aa
A02	51.268	Block1555	aaxbb	aa	aa	aa	aa	aa	aa	aa	aa	aa	aa	aa	aa	aa	aa	aa	aa	aa	aa	aa	aa	aa	aa	aa	aa	aa	aa	aa	ab	ab	ab	aa	aa	ab	bb	aa	aa	ab	aa	ab	bb	ab	aa	ab	ab	ab	aa
A02	51.268	Block1533	aaxbb	aa	aa	aa	aa	aa	aa	aa	aa	aa	aa	aa	aa	aa	aa	aa	aa	aa	aa	aa	aa	aa	aa	aa	aa	aa	aa	aa	ab	ab	ab	aa	aa	ab	bb	aa	aa	ab	aa	ab	bb	ab	aa	ab	ab	ab	aa
A02	51.268	Block1543	aaxbb	aa	aa	aa	aa	aa	aa	aa	aa	aa	aa	aa	aa	aa	aa	aa	aa	aa	aa	aa	aa	aa	aa	aa	aa	aa	aa	aa	ab	ab	ab	aa	aa	ab	bb	aa	aa	ab	aa	ab	bb	ab	aa	ab	ab	ab	aa
A02	51.268	Block1563	aaxbb	aa	aa	aa	aa	aa	aa	aa	aa	aa	aa	aa	aa	aa	aa	aa	aa	aa	aa	aa	aa	aa	aa	aa	aa	aa	aa	aa	ab	ab	ab	aa	aa	ab	bb	aa	aa	ab	aa	ab	bb	ab	aa	ab	ab	ab	aa
A02	51.268	Block1583	aaxbb	aa	aa	aa	aa	aa	aa	aa	aa	aa	aa	aa	aa	aa	aa	aa	aa	aa	aa	aa	aa	aa	aa	aa	aa	aa	aa	aa	ab	ab	ab	aa	aa	ab	bb	aa	aa	ab	aa	ab	bb	ab	aa	ab	ab	ab	aa
A02	51.768	Block1562	aaxbb	aa	aa	aa	aa	aa	aa	aa	aa	aa	aa	aa	aa	aa	aa	aa	aa	aa	aa	aa	aa	aa	aa	aa	aa	aa	aa	aa	ab	ab	ab	aa	aa	ab	bb	aa	aa	ab	aa	ab	bb	ab	aa	ab	ab	ab	aa
A02	51.768	Block1537	aaxbb	aa	aa	aa	aa	aa	aa	aa	aa	aa	aa	aa	aa	aa	aa	aa	aa	aa	aa	aa	aa	aa	aa	aa	aa	aa	aa	aa	ab	ab	ab	aa	aa	ab	bb	aa	aa	ab	aa	ab	bb	ab	aa	ab	ab	ab	aa
A02	51.768	Block1585	aaxbb	aa	aa	aa	aa	aa	aa	aa	aa	aa	aa	aa	aa	aa	aa	aa	aa	aa	aa	aa	aa	aa	aa	aa	aa	aa	aa	aa	ab	ab	ab	aa	aa	ab	bb	aa	aa	ab	aa	ab	bb	ab	aa	ab	ab	ab	aa
A02	52.018	Block1581	aaxbb	aa	aa	aa	aa	aa	aa	aa	aa	aa	aa	aa	aa	aa	aa	aa	aa	aa	aa	aa	aa	aa	aa	aa	aa	aa	aa	aa	ab	ab	ab	aa	aa	ab	bb	aa	aa	ab	aa	ab	bb	ab	aa	ab	ab	ab	aa
A02	52.018	Block1595	aaxbb	aa	aa	aa	aa	aa	aa	aa	aa	aa	aa	aa	aa	aa	aa	aa	aa	aa	aa	aa	aa	aa	aa	aa	aa	aa	aa	aa	ab	ab	ab	aa	aa	ab	bb	aa	aa	ab	aa	ab	bb	ab	aa	ab	ab	ab	aa
A02	52.268	Block1592	aaxbb	aa	aa	aa	aa	aa	aa	aa	aa	aa	aa	aa	aa	aa	aa	aa	aa	aa	aa	aa	aa	aa	aa	aa	aa	aa	aa	aa	ab	ab	ab	aa	aa	ab	bb	aa	aa	ab	aa	ab	bb	ab	aa	ab	ab	ab	aa
A02	52.768	Block1596	aaxbb	aa	aa	aa	aa	aa	aa	aa	aa	aa	aa	aa	aa	aa	aa	aa	aa	aa	aa	aa	aa	aa	aa	aa	aa	aa	aa	aa	ab	ab	ab	aa	aa	ab	bb	aa	aa	ab	aa	ab	bb	ab	aa	ab	ab	ab	aa
A02	52.768	Block1597	aaxbb	aa	aa	aa	aa	aa	aa	aa	aa	aa	aa	aa	aa	aa	aa	aa	aa	aa	aa	aa	aa	aa	aa	aa	aa	aa	aa	aa	ab	ab	ab	aa	aa	ab	bb	aa	aa	ab	aa	ab	bb	ab	aa	ab	ab	ab	aa
A02	52.768	Block1614	aaxbb	aa	aa	aa	aa	aa	aa	aa	aa	aa	aa	aa	aa	aa	aa	aa	aa	aa	aa	aa	aa	aa	aa	aa	aa	aa	aa	aa	ab	ab	ab	aa	aa	ab	bb	aa	aa	ab	aa	ab	bb	ab	aa	ab	ab	ab	aa
A02	52.768	Block1602	aaxbb	aa	aa	aa	aa	aa	aa	aa	aa	aa	aa	aa	aa	aa	aa	aa	aa	aa	aa	aa	aa	aa	aa	aa	aa	aa	aa	aa	ab	ab	ab	aa	aa	ab	bb	aa	aa	ab	aa	ab	bb	ab	aa	ab	ab	ab	aa
A02	52.768	Block1608	aaxbb	aa	aa	aa	aa	aa	aa	aa	aa	aa	aa	aa	aa	aa	aa	aa	aa	aa	aa	aa	aa	aa	aa	aa	aa	aa	aa	aa	ab	ab	ab	aa	aa	ab	bb	aa	aa	ab	aa	ab	bb	ab	aa	ab	ab	ab	aa
A02	52.768	Block1609	aaxbb	aa	aa	aa	aa	aa	aa	aa	aa	aa	aa	aa	aa	aa	aa	aa	aa	aa	aa	aa	aa	aa	aa	aa	aa	aa	aa	aa	ab	ab	ab	aa	aa	ab	bb	aa	aa	ab	aa	ab	bb	ab	aa	ab	ab	ab	aa
A02	52.768	Block1604	aaxbb	aa	aa	aa	aa	aa	aa	aa	aa	aa	aa	aa	aa	aa	aa	aa	aa	aa	aa	aa	aa	aa	aa	aa	aa	aa	aa	aa	ab	ab	ab	aa	aa	ab	bb	aa	aa	ab	aa	ab	bb	ab	aa	ab	ab	ab	aa
A02	52.768	Block1625	aaxbb	aa	aa	aa	aa	aa	aa	aa	aa	aa	aa	aa	aa	aa	aa	aa	aa	aa	aa	aa	aa	aa	aa	aa	aa	aa	aa	aa	ab	ab	ab	aa	aa	ab	bb	aa	aa	ab	aa	ab	bb	ab	aa	ab	ab	ab	aa
A02	53.018	Block1610	aaxbb	aa	aa	aa	aa	aa	aa	aa	aa	aa	aa	aa	aa	aa	aa	aa	aa	aa	aa	aa	aa	aa	aa	aa	aa	aa	aa	aa	ab	ab	ab	aa	aa	ab	bb	aa	aa	ab	aa	ab	bb	ab	aa	ab	ab	ab	aa
A02	53.018	Block1627	aaxbb	aa	aa	aa	aa	aa	aa	aa	aa	aa	aa	aa	aa	aa	aa	aa	aa	aa	aa	aa	aa	aa	aa	aa	aa	aa	aa	aa	ab	ab	ab	aa	aa	ab	bb	aa	aa	ab	aa	ab	bb	ab	aa	ab	ab	ab	aa
A02	53.268	Block1631	aaxbb	aa	aa	aa	aa	aa	aa	aa	aa	aa	aa	aa	aa	aa	aa	aa	aa	aa	aa	aa	aa	aa	aa	aa	aa	aa	aa	aa	ab	ab	ab	aa	aa	ab	bb	aa	aa	ab	aa	ab	bb	ab	aa	ab	ab	ab	aa
A02	53.518	Block1646	aaxbb	aa	aa	aa	aa	aa	aa	aa	aa	aa	aa	aa	aa	aa	aa	aa	aa	aa	aa	aa	aa	aa	aa	aa	aa	aa	aa	aa	ab	ab	ab	aa	aa	ab	bb	aa	aa	ab	aa	ab	bb	ab	aa	ab	ab	ab	aa
A02	54.269	Block1647	aaxbb	aa	aa	aa	aa	aa	aa	aa	aa	aa	aa	aa	aa	aa	aa	aa	aa	aa	aa	aa	aa	aa	aa	aa	aa	aa	aa	aa	ab	aa	ab	aa	aa	ab	bb	aa	aa	aa	aa	ab	bb	ab	aa	ab	ab	ab	aa
A02	54.769	Block1635	aaxbb	aa	aa	aa	aa	aa	aa	aa	aa	aa	aa	aa	aa	aa	aa	aa	aa	aa	aa	aa	aa	aa	aa	aa	aa	aa	aa	aa	ab	aa	ab	aa	aa	ab	bb	aa	aa	aa	aa	ab	bb	ab	aa	ab	ab	ab	aa
A02	54.769	Block1629	aaxbb	aa	aa	aa	aa	aa	aa	aa	aa	aa	aa	aa	aa	aa	aa	aa	aa	aa	aa	aa	aa	aa	aa	aa	aa	aa	aa	aa	ab	aa	ab	aa	aa	ab	bb	aa	aa	aa	aa	ab	bb	ab	aa	ab	ab	ab	aa
A02	54.769	Block1628	aaxbb	aa	aa	aa	aa	aa	aa	aa	aa	aa	aa	aa	aa	aa	aa	aa	aa	aa	aa	aa	aa	aa	aa	aa	aa	aa	aa	aa	ab	aa	ab	aa	aa	ab	bb	aa	aa	aa	aa	ab	bb	ab	aa	ab	ab	ab	aa
A02	54.769	Block1640	aaxbb	aa	aa	aa	aa	aa	aa	aa	aa	aa	aa	aa	aa	aa	aa	aa	aa	aa	aa	aa	aa	aa	aa	aa	aa	aa	aa	aa	ab	aa	ab	aa	aa	ab	bb	aa	aa	aa	aa	ab	bb	ab	aa	ab	ab	ab	aa
A02	54.769	Block1674	aaxbb	aa	aa	aa	aa	aa	aa	aa	aa	aa	aa	aa	aa	aa	aa	aa	aa	aa	aa	aa	aa	aa	aa	aa	aa	aa	aa	aa	ab	aa	ab	aa	aa	ab	bb	aa	aa	aa	aa	ab	bb	ab	aa	ab	ab	ab	aa
A02	55.019	Block1659	aaxbb	aa	aa	aa	aa	aa	aa	aa	aa	aa	aa	aa	aa	aa	aa	aa	aa	aa	aa	aa	aa	aa	aa	aa	aa	aa	aa	aa	ab	aa	ab	aa	aa	ab	bb	aa	aa	aa	aa	ab	bb	ab	aa	ab	ab	ab	aa
A02	55.269	Block1650	aaxbb	aa	aa	aa	aa	aa	aa	aa	aa	aa	aa	aa	aa	aa	aa	aa	aa	aa	aa	aa	aa	aa	aa	aa	aa	aa	aa	aa	ab	aa	ab	aa	aa	ab	bb	aa	aa	aa	aa	ab	bb	ab	aa	ab	ab	ab	aa
A02	55.269	Block1645	aaxbb	aa	aa	aa	aa	aa	aa	aa	aa	aa	aa	aa	aa	aa	aa	aa	aa	aa	aa	aa	aa	aa	aa	aa	aa	aa	aa	aa	ab	aa	ab	aa	aa	ab	bb	aa	aa	aa	aa	ab	bb	ab	aa	ab	ab	ab	aa
A02	55.269	Block1653	aaxbb	aa	aa	aa	aa	aa	aa	aa	aa	aa	aa	aa	aa	aa	aa	aa	aa	aa	aa	aa	aa	aa	aa	aa	aa	aa	aa	aa	ab	aa	ab	aa	aa	ab	bb	aa	aa	aa	aa	ab	bb	ab	aa	ab	ab	ab	aa
A02	55.269	Block1665	aaxbb	aa	aa	aa	aa	aa	aa	aa	aa	aa	aa	aa	aa	aa	aa	aa	aa	aa	aa	aa	aa	aa	aa	aa	aa	aa	aa	aa	ab	aa	ab	aa	aa	ab	bb	aa	aa	aa	aa	ab	bb	ab	aa	ab	ab	ab	aa
A02	55.519	Block1706	aaxbb	aa	aa	aa	aa	aa	aa	aa	aa	aa	aa	aa	aa	aa	aa	aa	aa	aa	aa	aa	aa	aa	aa	aa	aa	aa	aa	aa	ab	aa	ab	aa	aa	ab	bb	aa	aa	aa	aa	ab	bb	ab	aa	ab	ab	ab	aa
A02	55.769	Block1655	aaxbb	aa	aa	aa	aa	aa	aa	aa	aa	aa	aa	aa	aa	aa	aa	aa	aa	aa	aa	aa	aa	aa	aa	aa	aa	aa	aa	aa	ab	aa	ab	aa	aa	ab	bb	aa	aa	aa	aa	ab	bb	ab	aa	ab	ab	ab	aa
A02	55.769	Block1657	aaxbb	aa	aa	aa	aa	aa	aa	aa	aa	aa	aa	aa	aa	aa	aa	aa	aa	aa	aa	aa	aa	aa	aa	aa	aa	aa	aa	aa	ab	aa	ab	aa	aa	ab	bb	aa	aa	aa	aa	ab	bb	ab	aa	ab	ab	ab	aa
A02	55.769	Block1673	aaxbb	aa	aa	aa	aa	aa	aa	aa	aa	aa	aa	aa	aa	aa	aa	aa	aa	aa	aa	aa	aa	aa	aa	aa	aa	aa	aa	aa	ab	aa	ab	aa	aa	ab	bb	aa	aa	aa	aa	ab	bb	ab	aa	ab	ab	ab	aa
A02	55.769	Block1671	aaxbb	aa	aa	aa	aa	aa	aa	aa	aa	aa	aa	aa	aa	aa	aa	aa	aa	aa	aa	aa	aa	aa	aa	aa	aa	aa	aa	aa	ab	aa	ab	aa	aa	ab	bb	aa	aa	aa	aa	ab	bb	ab	aa	ab	ab	ab	aa
A02	55.769	Block1712	aaxbb	aa	aa	aa	aa	aa	aa	aa	aa	aa	aa	aa	aa	aa	aa	aa	aa	aa	aa	aa	aa	aa	aa	aa	aa	aa	aa	aa	ab	aa	ab	aa	aa	ab	bb	aa	aa	aa	aa	ab	bb	ab	aa	ab	ab	ab	aa
A02	56.019	Block1663	aaxbb	aa	aa	aa	aa	aa	aa	aa	aa	aa	aa	aa	aa	aa	aa	aa	aa	aa	aa	aa	aa	aa	aa	aa	aa	aa	aa	aa	ab	aa	ab	aa	aa	ab	bb	aa	aa	aa	aa	ab	bb	ab	aa	ab	ab	ab	aa
A02	56.019	Block1662	aaxbb	aa	aa	aa	aa	aa	aa	aa	aa	aa	aa	aa	aa	aa	aa	aa	aa	aa	aa	aa	aa	aa	aa	aa	aa	aa	aa	aa	ab	aa	ab	aa	aa	ab	bb	aa	aa	aa	aa	ab	bb	ab	aa	ab	ab	ab	aa
A02	56.019	Block1669	aaxbb	aa	aa	aa	aa	aa	aa	aa	aa	aa	aa	aa	aa	aa	aa	aa	aa	aa	aa	aa	aa	aa	aa	aa	aa	aa	aa	aa	ab	aa	ab	aa	aa	ab	bb	aa	aa	aa	aa	ab	bb	ab	aa	ab	ab	ab	aa
A02	56.019	Block1668	aaxbb	aa	aa	aa	aa	aa	aa	aa	aa	aa	aa	aa	aa	aa	aa	aa	aa	aa	aa	aa	aa	aa	aa	aa	aa	aa	aa	aa	ab	aa	ab	aa	aa	ab	bb	aa	aa	aa	aa	ab	bb	ab	aa	ab	ab	ab	aa
A02	56.019	Block1667	aaxbb	aa	aa	aa	aa	aa	aa	aa	aa	aa	aa	aa	aa	aa	aa	aa	aa	aa	aa	aa	aa	aa	aa	aa	aa	aa	aa	aa	ab	aa	ab	aa	aa	ab	bb	aa	aa	aa	aa	ab	bb	ab	aa	ab	ab	ab	aa
A02	56.019	Block1680	aaxbb	aa	aa	aa	aa	aa	aa	aa	aa	aa	aa	aa	aa	aa	aa	aa	aa	aa	aa	aa	aa	aa	aa	aa	aa	aa	aa	aa	ab	aa	ab	aa	aa	ab	bb	aa	aa	aa	aa	ab	bb	ab	aa	ab	ab	ab	aa
A02	56.019	Block1716	aaxbb	aa	aa	aa	aa	aa	aa	aa	aa	aa	aa	aa	aa	aa	aa	aa	aa	aa	aa	aa	aa	aa	aa	aa	aa	aa	aa	aa	ab	aa	ab	aa	aa	ab	bb	aa	aa	aa	aa	ab	bb	ab	aa	ab	ab	ab	aa
A02	56.269	Block1679	aaxbb	aa	aa	aa	aa	aa	aa	aa	aa	aa	aa	aa	aa	aa	aa	aa	aa	aa	aa	aa	aa	aa	aa	aa	aa	aa	aa	aa	ab	aa	ab	aa	aa	ab	bb	aa	aa	aa	aa	ab	bb	ab	aa	ab	ab	ab	aa
A02	56.269	Block1681	aaxbb	aa	aa	aa	aa	aa	aa	aa	aa	aa	aa	aa	aa	aa	aa	aa	aa	aa	aa	aa	aa	aa	aa	aa	aa	aa	aa	aa	ab	aa	ab	aa	aa	ab	bb	aa	aa	aa	aa	ab	bb	ab	aa	ab	ab	ab	aa
A02	56.269	Block1713	aaxbb	aa	aa	aa	aa	aa	aa	aa	aa	aa	aa	aa	aa	aa	aa	aa	aa	aa	aa	aa	aa	aa	aa	aa	aa	aa	aa	aa	ab	aa	ab	aa	aa	ab	bb	aa	aa	aa	aa	ab	bb	ab	aa	ab	ab	ab	aa
A02	56.269	Block1717	aaxbb	aa	aa	aa	aa	aa	aa	aa	aa	aa	aa	aa	aa	aa	aa	aa	aa	aa	aa	aa	aa	aa	aa	aa	aa	aa	aa	aa	ab	aa	ab	aa	aa	ab	bb	aa	aa	aa	aa	ab	bb	ab	aa	ab	ab	ab	aa
A02	56.769	Block1714	aaxbb	aa	aa	aa	aa	aa	aa	aa	aa	aa	aa	aa	aa	aa	aa	aa	aa	aa	aa	aa	aa	aa	aa	aa	aa	aa	aa	aa	ab	aa	ab	aa	aa	ab	bb	aa	aa	aa	aa	ab	bb	ab	aa	ab	ab	ab	aa
A02	56.769	Block1715	aaxbb	aa	aa	aa	aa	aa	aa	aa	aa	aa	aa	aa	aa	aa	aa	aa	aa	aa	aa	aa	aa	aa	aa	aa	aa	aa	aa	aa	ab	aa	ab	aa	aa	ab	bb	aa	aa	aa	aa	ab	bb	ab	aa	ab	ab	ab	aa
A02	56.769	Block1721	aaxbb	aa	aa	aa	aa	aa	aa	aa	aa	aa	aa	aa	aa	aa	aa	aa	aa	aa	aa	aa	aa	aa	aa	aa	aa	aa	aa	aa	ab	aa	ab	aa	aa	ab	bb	aa	aa	aa	aa	ab	bb	ab	aa	ab	ab	ab	aa
A02	57.019	Block1723	aaxbb	aa	aa	aa	aa	aa	aa	aa	aa	aa	aa	aa	aa	aa	aa	aa	aa	aa	aa	aa	aa	aa	aa	aa	aa	aa	aa	aa	ab	aa	ab	aa	aa	ab	bb	aa	aa	aa	aa	ab	bb	ab	aa	ab	ab	ab	aa
A02	57.269	Block1727	aaxbb	aa	aa	aa	aa	aa	aa	aa	aa	aa	aa	aa	aa	aa	aa	aa	aa	aa	aa	aa	aa	aa	aa	aa	aa	aa	aa	aa	ab	aa	ab	aa	aa	ab	bb	aa	aa	aa	aa	ab	bb	ab	aa	ab	ab	ab	aa
A02	57.519	Block1730	aaxbb	aa	aa	aa	aa	aa	aa	aa	aa	aa	aa	aa	aa	aa	aa	aa	aa	aa	aa	aa	aa	aa	aa	aa	aa	aa	aa	aa	ab	aa	ab	aa	aa	ab	bb	aa	aa	aa	aa	ab	bb	ab	aa	ab	ab	ab	aa
A02	58.519	Block1726	aaxbb	aa	aa	aa	aa	aa	aa	aa	aa	aa	aa	aa	aa	aa	aa	aa	aa	aa	aa	aa	aa	aa	aa	aa	aa	aa	aa	aa	ab	aa	ab	aa	aa	ab	bb	aa	aa	aa	aa	ab	bb	ab	aa	ab	ab	ab	aa
A02	58.519	Block1734	aaxbb	aa	aa	aa	aa	aa	aa	aa	aa	aa	aa	aa	aa	aa	aa	aa	aa	aa	aa	aa	aa	aa	aa	aa	aa	aa	aa	aa	ab	aa	ab	aa	aa	ab	bb	aa	aa	aa	aa	ab	bb	ab	aa	ab	ab	ab	aa
A02	58.769	Block1729	aaxbb	aa	aa	aa	aa	aa	aa	aa	aa	aa	aa	aa	aa	aa	aa	aa	aa	aa	aa	aa	aa	aa	aa	aa	aa	aa	aa	aa	ab	aa	ab	aa	aa	ab	bb	aa	aa	aa	aa	ab	bb	ab	aa	ab	ab	ab	aa
A02	58.769	Block1728	aaxbb	aa	aa	aa	aa	aa	aa	aa	aa	aa	aa	aa	aa	aa	aa	aa	aa	aa	aa	aa	aa	aa	aa	aa	aa	aa	aa	aa	ab	aa	ab	aa	aa	ab	bb	aa	aa	aa	aa	ab	bb	ab	aa	ab	ab	ab	aa
A02	58.769	Block1738	aaxbb	aa	aa	aa	aa	aa	aa	aa	aa	aa	aa	aa	aa	aa	aa	aa	aa	aa	aa	aa	aa	aa	aa	aa	aa	aa	aa	aa	ab	aa	ab	aa	aa	ab	bb	aa	aa	aa	aa	ab	bb	ab	aa	ab	ab	ab	aa
A02	59.019	Block1731	aaxbb	aa	aa	aa	aa	aa	aa	aa	aa	aa	aa	aa	aa	aa	aa	aa	aa	aa	aa	aa	aa	aa	aa	aa	aa	aa	aa	aa	ab	aa	ab	aa	aa	ab	bb	aa	aa	aa	aa	ab	bb	ab	aa	ab	ab	ab	aa
A02	59.019	Block1793	aaxbb	aa	aa	aa	aa	aa	aa	aa	aa	aa	aa	aa	aa	aa	aa	aa	aa	aa	aa	aa	aa	aa	aa	aa	aa	aa	aa	aa	ab	aa	ab	aa	aa	ab	bb	aa	aa	aa	aa	ab	bb	ab	aa	ab	ab	ab	aa
A02	59.519	Block1798	aaxbb	aa	aa	aa	aa	aa	aa	aa	aa	aa	aa	aa	aa	aa	aa	aa	aa	aa	aa	aa	aa	aa	aa	aa	aa	aa	aa	aa	ab	aa	ab	aa	aa	ab	bb	aa	aa	aa	aa	ab	bb	ab	aa	ab	ab	ab	aa
A02	60.519	Block1740	aaxbb	aa	aa	aa	aa	aa	aa	aa	aa	aa	aa	aa	aa	aa	aa	aa	aa	aa	aa	aa	aa	aa	aa	aa	aa	aa	aa	aa	ab	aa	ab	aa	aa	ab	bb	aa	aa	aa	aa	ab	bb	ab	aa	ab	ab	ab	aa
A02	60.519	Block1772	aaxbb	aa	aa	aa	aa	aa	aa	aa	aa	aa	aa	aa	aa	aa	aa	aa	aa	aa	aa	aa	aa	aa	aa	aa	aa	aa	aa	aa	ab	aa	ab	aa	aa	ab	bb	aa	aa	aa	aa	ab	bb	ab	aa	ab	ab	ab	aa
A02	60.519	Block1771	aaxbb	aa	aa	aa	aa	aa	aa	aa	aa	aa	aa	aa	aa	aa	aa	aa	aa	aa	aa	aa	aa	aa	aa	aa	aa	aa	aa	aa	ab	aa	ab	aa	aa	ab	bb	aa	aa	aa	aa	ab	bb	ab	aa	ab	ab	ab	aa
A02	60.519	Block1739	aaxbb	aa	aa	aa	aa	aa	aa	aa	aa	aa	aa	aa	aa	aa	aa	aa	aa	aa	aa	aa	aa	aa	aa	aa	aa	aa	aa	aa	ab	aa	ab	aa	aa	ab	bb	aa	aa	aa	aa	ab	bb	ab	aa	ab	ab	ab	aa
A02	60.519	Block1747	aaxbb	aa	aa	aa	aa	aa	aa	aa	aa	aa	aa	aa	aa	aa	aa	aa	aa	aa	aa	aa	aa	aa	aa	aa	aa	aa	aa	aa	ab	aa	ab	aa	aa	ab	bb	aa	aa	aa	aa	ab	bb	ab	aa	ab	ab	ab	aa
A02	60.519	Block1762	aaxbb	aa	aa	aa	aa	aa	aa	aa	aa	aa	aa	aa	aa	aa	aa	aa	aa	aa	aa	aa	aa	aa	aa	aa	aa	aa	aa	aa	ab	aa	ab	aa	aa	ab	bb	aa	aa	aa	aa	ab	bb	ab	aa	ab	ab	ab	aa
A02	60.519	Block1746	aaxbb	aa	aa	aa	aa	aa	aa	aa	aa	aa	aa	aa	aa	aa	aa	aa	aa	aa	aa	aa	aa	aa	aa	aa	aa	aa	aa	aa	ab	aa	ab	aa	aa	ab	bb	aa	aa	aa	aa	ab	bb	ab	aa	ab	ab	ab	aa
A02	60.519	Block1736	aaxbb	aa	aa	aa	aa	aa	aa	aa	aa	aa	aa	aa	aa	aa	aa	aa	aa	aa	aa	aa	aa	aa	aa	aa	aa	aa	aa	aa	ab	aa	ab	aa	aa	ab	bb	aa	aa	aa	aa	ab	bb	ab	aa	ab	ab	ab	aa
A02	60.519	Block1744	aaxbb	aa	aa	aa	aa	aa	aa	aa	aa	aa	aa	aa	aa	aa	aa	aa	aa	aa	aa	aa	aa	aa	aa	aa	aa	aa	aa	aa	ab	aa	ab	aa	aa	ab	bb	aa	aa	aa	aa	ab	bb	ab	aa	ab	ab	ab	aa
A02	60.519	Block1737	aaxbb	aa	aa	aa	aa	aa	aa	aa	aa	aa	aa	aa	aa	aa	aa	aa	aa	aa	aa	aa	aa	aa	aa	aa	aa	aa	aa	aa	ab	aa	ab	aa	aa	ab	bb	aa	aa	aa	aa	ab	bb	ab	aa	ab	ab	ab	aa
A02	60.519	Block1760	aaxbb	aa	aa	aa	aa	aa	aa	aa	aa	aa	aa	aa	aa	aa	aa	aa	aa	aa	aa	aa	aa	aa	aa	aa	aa	aa	aa	aa	ab	aa	ab	aa	aa	ab	bb	aa	aa	aa	aa	ab	bb	ab	aa	ab	ab	ab	aa
A02	60.519	Block1765	aaxbb	aa	aa	aa	aa	aa	aa	aa	aa	aa	aa	aa	aa	aa	aa	aa	aa	aa	aa	aa	aa	aa	aa	aa	aa	aa	aa	aa	ab	aa	ab	aa	aa	ab	bb	aa	aa	aa	aa	ab	bb	ab	aa	ab	ab	ab	aa
A02	60.519	Block1757	aaxbb	aa	aa	aa	aa	aa	aa	aa	aa	aa	aa	aa	aa	aa	aa	aa	aa	aa	aa	aa	aa	aa	aa	aa	aa	aa	aa	aa	ab	aa	ab	aa	aa	ab	bb	aa	aa	aa	aa	ab	bb	ab	aa	ab	ab	ab	aa
A02	60.519	Block1810	aaxbb	aa	aa	aa	aa	aa	aa	aa	aa	aa	aa	aa	aa	aa	aa	aa	aa	aa	aa	aa	aa	aa	aa	aa	aa	aa	aa	aa	ab	aa	ab	aa	aa	ab	bb	aa	aa	aa	aa	ab	bb	ab	aa	ab	ab	ab	aa
A02	60.769	Block1782	aaxbb	aa	aa	aa	aa	aa	aa	aa	aa	aa	aa	aa	aa	aa	aa	aa	aa	aa	aa	aa	aa	aa	aa	aa	aa	aa	aa	aa	ab	aa	ab	aa	aa	ab	bb	aa	aa	aa	aa	bb	bb	ab	aa	ab	ab	ab	aa
A02	60.769	Block1785	aaxbb	aa	aa	aa	aa	aa	aa	aa	aa	aa	aa	aa	aa	aa	aa	aa	aa	aa	aa	aa	aa	aa	aa	aa	aa	aa	aa	aa	ab	aa	ab	aa	aa	ab	bb	aa	aa	aa	aa	bb	bb	ab	aa	ab	ab	ab	aa
A02	60.769	Block1795	aaxbb	aa	aa	aa	aa	aa	aa	aa	aa	aa	aa	aa	aa	aa	aa	aa	aa	aa	aa	aa	aa	aa	aa	aa	aa	aa	aa	aa	ab	aa	ab	aa	aa	ab	bb	aa	aa	aa	aa	bb	bb	ab	aa	ab	ab	ab	aa
A02	60.769	Block1796	aaxbb	aa	aa	aa	aa	aa	aa	aa	aa	aa	aa	aa	aa	aa	aa	aa	aa	aa	aa	aa	aa	aa	aa	aa	aa	aa	aa	aa	ab	aa	ab	aa	aa	ab	bb	aa	aa	aa	aa	bb	bb	ab	aa	ab	ab	ab	aa
A02	60.769	Block1907	aaxbb	aa	aa	aa	aa	aa	aa	aa	aa	aa	aa	aa	aa	aa	aa	aa	aa	aa	aa	aa	aa	aa	aa	aa	aa	aa	aa	aa	ab	aa	ab	aa	aa	ab	bb	aa	aa	aa	aa	bb	bb	ab	aa	ab	ab	ab	aa
A02	61.019	Block1797	aaxbb	aa	aa	aa	aa	aa	aa	aa	aa	aa	aa	aa	aa	aa	aa	aa	aa	aa	aa	aa	aa	aa	aa	aa	aa	aa	aa	aa	ab	aa	ab	aa	aa	ab	bb	aa	aa	aa	aa	bb	bb	ab	aa	ab	ab	ab	aa
A02	61.019	Block1809	aaxbb	aa	aa	aa	aa	aa	aa	aa	aa	aa	aa	aa	aa	aa	aa	aa	aa	aa	aa	aa	aa	aa	aa	aa	aa	aa	aa	aa	ab	aa	ab	aa	aa	ab	bb	aa	aa	aa	aa	bb	bb	ab	aa	ab	ab	ab	aa
A02	61.019	Block2017	aaxbb	aa	aa	aa	aa	aa	aa	aa	aa	aa	aa	aa	aa	aa	aa	aa	aa	aa	aa	aa	aa	aa	aa	aa	aa	aa	aa	aa	ab	aa	ab	aa	aa	ab	bb	aa	aa	aa	aa	bb	bb	ab	aa	ab	ab	ab	aa
A02	61.519	Block1811	aaxbb	aa	aa	aa	aa	aa	aa	aa	aa	aa	aa	aa	aa	aa	aa	aa	aa	aa	aa	aa	aa	aa	aa	aa	aa	aa	aa	aa	ab	aa	ab	aa	aa	ab	bb	aa	aa	aa	aa	bb	bb	ab	aa	ab	ab	ab	aa
A02	61.519	Block1905	aaxbb	aa	aa	aa	aa	aa	aa	aa	aa	aa	aa	aa	aa	aa	aa	aa	aa	aa	aa	aa	aa	aa	aa	aa	aa	aa	aa	aa	ab	aa	ab	aa	aa	ab	bb	aa	aa	aa	aa	bb	bb	ab	aa	ab	ab	ab	aa
A02	61.519	Block2088	aaxbb	aa	aa	aa	aa	aa	aa	aa	aa	aa	aa	aa	aa	aa	aa	aa	aa	aa	aa	aa	aa	aa	aa	aa	aa	aa	aa	aa	ab	aa	ab	aa	aa	ab	bb	aa	aa	aa	aa	bb	bb	ab	aa	ab	ab	ab	aa
A02	63.57	Block1946	aaxbb	aa	aa	aa	aa	aa	aa	aa	aa	aa	aa	aa	aa	aa	aa	aa	aa	aa	aa	aa	aa	aa	aa	aa	aa	aa	aa	aa	ab	aa	ab	aa	aa	ab	bb	aa	aa	aa	aa	bb	bb	ab	aa	ab	ab	ab	aa
A02	63.57	Block1955	aaxbb	aa	aa	aa	aa	aa	aa	aa	aa	aa	aa	aa	aa	aa	aa	aa	aa	aa	aa	aa	aa	aa	aa	aa	aa	aa	aa	aa	ab	aa	ab	aa	aa	ab	bb	aa	aa	aa	aa	bb	bb	ab	aa	ab	ab	ab	aa
A02	63.57	Block1992	aaxbb	aa	aa	aa	aa	aa	aa	aa	aa	aa	aa	aa	aa	aa	aa	aa	aa	aa	aa	aa	aa	aa	aa	aa	aa	aa	aa	aa	ab	aa	ab	aa	aa	ab	bb	aa	aa	aa	aa	bb	bb	ab	aa	ab	ab	ab	aa
A02	63.57	Block1996	aaxbb	aa	aa	aa	aa	aa	aa	aa	aa	aa	aa	aa	aa	aa	aa	aa	aa	aa	aa	aa	aa	aa	aa	aa	aa	aa	aa	aa	ab	aa	ab	aa	aa	ab	bb	aa	aa	aa	aa	bb	bb	ab	aa	ab	ab	ab	aa
A02	63.57	Block2012	aaxbb	aa	aa	aa	aa	aa	aa	aa	aa	aa	aa	aa	aa	aa	aa	aa	aa	aa	aa	aa	aa	aa	aa	aa	aa	aa	aa	aa	ab	aa	ab	aa	aa	ab	bb	aa	aa	aa	aa	bb	bb	ab	aa	ab	ab	ab	aa
A02	63.57	Block2042	aaxbb	aa	aa	aa	aa	aa	aa	aa	aa	aa	aa	aa	aa	aa	aa	aa	aa	aa	aa	aa	aa	aa	aa	aa	aa	aa	aa	aa	ab	aa	ab	aa	aa	ab	bb	aa	aa	aa	aa	bb	bb	ab	aa	ab	ab	ab	aa
A02	63.57	Block2044	aaxbb	aa	aa	aa	aa	aa	aa	aa	aa	aa	aa	aa	aa	aa	aa	aa	aa	aa	aa	aa	aa	aa	aa	aa	aa	aa	aa	aa	ab	aa	ab	aa	aa	ab	bb	aa	aa	aa	aa	bb	bb	ab	aa	ab	ab	ab	aa
A02	63.57	Block2092	aaxbb	aa	aa	aa	aa	aa	aa	aa	aa	aa	aa	aa	aa	aa	aa	aa	aa	aa	aa	aa	aa	aa	aa	aa	aa	aa	aa	aa	ab	aa	ab	aa	aa	ab	bb	aa	aa	aa	aa	bb	bb	ab	aa	ab	ab	ab	aa
A02	63.57	Block1982	aaxbb	aa	aa	aa	aa	aa	aa	aa	aa	aa	aa	aa	aa	aa	aa	aa	aa	aa	aa	aa	aa	aa	aa	aa	aa	aa	aa	aa	ab	aa	ab	aa	aa	ab	bb	aa	aa	aa	aa	bb	bb	ab	aa	ab	ab	ab	aa
A02	63.57	Block1967	aaxbb	aa	aa	aa	aa	aa	aa	aa	aa	aa	aa	aa	aa	aa	aa	aa	aa	aa	aa	aa	aa	aa	aa	aa	aa	aa	aa	aa	ab	aa	ab	aa	aa	ab	bb	aa	aa	aa	aa	bb	bb	ab	aa	ab	ab	ab	aa
A02	63.57	Block1945	aaxbb	aa	aa	aa	aa	aa	aa	aa	aa	aa	aa	aa	aa	aa	aa	aa	aa	aa	aa	aa	aa	aa	aa	aa	aa	aa	aa	aa	ab	aa	ab	aa	aa	ab	bb	aa	aa	aa	aa	bb	bb	ab	aa	ab	ab	ab	aa
A02	63.57	Block2040	aaxbb	aa	aa	aa	aa	aa	aa	aa	aa	aa	aa	aa	aa	aa	aa	aa	aa	aa	aa	aa	aa	aa	aa	aa	aa	aa	aa	aa	ab	aa	ab	aa	aa	ab	bb	aa	aa	aa	aa	bb	bb	ab	aa	ab	ab	ab	aa
A02	63.57	Block2001	aaxbb	aa	aa	aa	aa	aa	aa	aa	aa	aa	aa	aa	aa	aa	aa	aa	aa	aa	aa	aa	aa	aa	aa	aa	aa	aa	aa	aa	ab	aa	ab	aa	aa	ab	bb	aa	aa	aa	aa	bb	bb	ab	aa	ab	ab	ab	aa
A02	63.57	Block2109	aaxbb	aa	aa	aa	aa	aa	aa	aa	aa	aa	aa	aa	aa	aa	aa	aa	aa	aa	aa	aa	aa	aa	aa	aa	aa	aa	aa	aa	ab	aa	ab	aa	aa	ab	bb	aa	aa	aa	aa	bb	bb	ab	aa	ab	ab	ab	aa
A02	63.57	Block2048	aaxbb	aa	aa	aa	aa	aa	aa	aa	aa	aa	aa	aa	aa	aa	aa	aa	aa	aa	aa	aa	aa	aa	aa	aa	aa	aa	aa	aa	ab	aa	ab	aa	aa	ab	bb	aa	aa	aa	aa	bb	bb	ab	aa	ab	ab	ab	aa
A02	63.57	Block2083	aaxbb	aa	aa	aa	aa	aa	aa	aa	aa	aa	aa	aa	aa	aa	aa	aa	aa	aa	aa	aa	aa	aa	aa	aa	aa	aa	aa	aa	ab	aa	ab	aa	aa	ab	bb	aa	aa	aa	aa	bb	bb	ab	aa	ab	ab	ab	aa
A02	63.57	Block1906	aaxbb	aa	aa	aa	aa	aa	aa	aa	aa	aa	aa	aa	aa	aa	aa	aa	aa	aa	aa	aa	aa	aa	aa	aa	aa	aa	aa	aa	ab	aa	ab	aa	aa	ab	bb	aa	aa	aa	aa	bb	bb	ab	aa	ab	ab	ab	aa
A02	63.57	Block1991	aaxbb	aa	aa	aa	aa	aa	aa	aa	aa	aa	aa	aa	aa	aa	aa	aa	aa	aa	aa	aa	aa	aa	aa	aa	aa	aa	aa	aa	ab	aa	ab	aa	aa	ab	bb	aa	aa	aa	aa	bb	bb	ab	aa	ab	ab	ab	aa
A02	63.57	Block2099	aaxbb	aa	aa	aa	aa	aa	aa	aa	aa	aa	aa	aa	aa	aa	aa	aa	aa	aa	aa	aa	aa	aa	aa	aa	aa	aa	aa	aa	ab	aa	ab	aa	aa	ab	bb	aa	aa	aa	aa	bb	bb	ab	aa	ab	ab	ab	aa
A02	63.82	Block2019	aaxbb	aa	aa	aa	aa	aa	aa	aa	aa	aa	aa	aa	aa	aa	aa	aa	aa	aa	aa	aa	aa	aa	aa	aa	aa	aa	aa	aa	ab	aa	ab	aa	aa	ab	bb	aa	aa	aa	aa	bb	bb	ab	aa	ab	ab	ab	aa
A02	63.82	Block2023	aaxbb	aa	aa	aa	aa	aa	aa	aa	aa	aa	aa	aa	aa	aa	aa	aa	aa	aa	aa	aa	aa	aa	aa	aa	aa	aa	aa	aa	ab	aa	ab	aa	aa	ab	bb	aa	aa	aa	aa	bb	bb	ab	aa	ab	ab	ab	aa
A02	63.82	Block2091	aaxbb	aa	aa	aa	aa	aa	aa	aa	aa	aa	aa	aa	aa	aa	aa	aa	aa	aa	aa	aa	aa	aa	aa	aa	aa	aa	aa	aa	ab	aa	ab	aa	aa	ab	bb	aa	aa	aa	aa	bb	bb	ab	aa	ab	ab	ab	aa
A02	63.82	Block2090	aaxbb	aa	aa	aa	aa	aa	aa	aa	aa	aa	aa	aa	aa	aa	aa	aa	aa	aa	aa	aa	aa	aa	aa	aa	aa	aa	aa	aa	ab	aa	ab	aa	aa	ab	bb	aa	aa	aa	aa	bb	bb	ab	aa	ab	ab	ab	aa
A02	63.82	Block2096	aaxbb	aa	aa	aa	aa	aa	aa	aa	aa	aa	aa	aa	aa	aa	aa	aa	aa	aa	aa	aa	aa	aa	aa	aa	aa	aa	aa	aa	ab	aa	ab	aa	aa	ab	bb	aa	aa	aa	aa	bb	bb	ab	aa	ab	ab	ab	aa
A02	63.82	Block2094	aaxbb	aa	aa	aa	aa	aa	aa	aa	aa	aa	aa	aa	aa	aa	aa	aa	aa	aa	aa	aa	aa	aa	aa	aa	aa	aa	aa	aa	ab	aa	ab	aa	aa	ab	bb	aa	aa	aa	aa	bb	bb	ab	aa	ab	ab	ab	aa
A02	63.82	Block1993	aaxbb	aa	aa	aa	aa	aa	aa	aa	aa	aa	aa	aa	aa	aa	aa	aa	aa	aa	aa	aa	aa	aa	aa	aa	aa	aa	aa	aa	ab	aa	ab	aa	aa	ab	bb	aa	aa	aa	aa	bb	bb	ab	aa	ab	ab	ab	aa
A02	63.82	Block2011	aaxbb	aa	aa	aa	aa	aa	aa	aa	aa	aa	aa	aa	aa	aa	aa	aa	aa	aa	aa	aa	aa	aa	aa	aa	aa	aa	aa	aa	ab	aa	ab	aa	aa	ab	bb	aa	aa	aa	aa	bb	bb	ab	aa	ab	ab	ab	aa
A02	63.82	Block2043	aaxbb	aa	aa	aa	aa	aa	aa	aa	aa	aa	aa	aa	aa	aa	aa	aa	aa	aa	aa	aa	aa	aa	aa	aa	aa	aa	aa	aa	ab	aa	ab	aa	aa	ab	bb	aa	aa	aa	aa	bb	bb	ab	aa	ab	ab	ab	aa
A02	63.82	Block2087	aaxbb	aa	aa	aa	aa	aa	aa	aa	aa	aa	aa	aa	aa	aa	aa	aa	aa	aa	aa	aa	aa	aa	aa	aa	aa	aa	aa	aa	ab	aa	ab	aa	aa	ab	bb	aa	aa	aa	aa	bb	bb	ab	aa	ab	ab	ab	aa
A02	63.82	Block2089	aaxbb	aa	aa	aa	aa	aa	aa	aa	aa	aa	aa	aa	aa	aa	aa	aa	aa	aa	aa	aa	aa	aa	aa	aa	aa	aa	aa	aa	ab	aa	ab	aa	aa	ab	bb	aa	aa	aa	aa	bb	bb	ab	aa	ab	ab	ab	aa
A02	63.82	Block2093	aaxbb	aa	aa	aa	aa	aa	aa	aa	aa	aa	aa	aa	aa	aa	aa	aa	aa	aa	aa	aa	aa	aa	aa	aa	aa	aa	aa	aa	ab	aa	ab	aa	aa	ab	bb	aa	aa	aa	aa	bb	bb	ab	aa	ab	ab	ab	aa
A02	63.82	Block2095	aaxbb	aa	aa	aa	aa	aa	aa	aa	aa	aa	aa	aa	aa	aa	aa	aa	aa	aa	aa	aa	aa	aa	aa	aa	aa	aa	aa	aa	ab	aa	ab	aa	aa	ab	bb	aa	aa	aa	aa	bb	bb	ab	aa	ab	ab	ab	aa
A02	63.82	Block2100	aaxbb	aa	aa	aa	aa	aa	aa	aa	aa	aa	aa	aa	aa	aa	aa	aa	aa	aa	aa	aa	aa	aa	aa	aa	aa	aa	aa	aa	ab	aa	ab	aa	aa	ab	bb	aa	aa	aa	aa	bb	bb	ab	aa	ab	ab	ab	aa
A02	64.07	Block2097	aaxbb	aa	ab	aa	aa	aa	aa	aa	aa	aa	aa	aa	aa	aa	aa	aa	aa	aa	aa	aa	aa	aa	aa	aa	aa	aa	aa	aa	ab	aa	ab	aa	aa	ab	bb	aa	aa	aa	aa	bb	bb	ab	aa	ab	ab	ab	aa
A02	64.07	Block2098	aaxbb	aa	ab	aa	aa	aa	aa	aa	aa	aa	aa	aa	aa	aa	aa	aa	aa	aa	aa	aa	aa	aa	aa	aa	aa	aa	aa	aa	ab	aa	ab	aa	aa	ab	bb	aa	aa	aa	aa	bb	bb	ab	aa	ab	ab	ab	aa
A02	64.07	Block2102	aaxbb	aa	ab	aa	aa	aa	aa	aa	aa	aa	aa	aa	aa	aa	aa	aa	aa	aa	aa	aa	aa	aa	aa	aa	aa	aa	aa	aa	ab	aa	ab	aa	aa	ab	bb	aa	aa	aa	aa	bb	bb	ab	aa	ab	ab	ab	aa
A02	64.82	Block1874	aaxbb	aa	ab	aa	aa	aa	aa	aa	aa	aa	ab	aa	aa	aa	aa	aa	aa	aa	aa	aa	aa	aa	ab	aa	aa	aa	ab	aa	ab	aa	ab	aa	aa	ab	bb	aa	aa	aa	aa	bb	bb	ab	aa	ab	ab	ab	aa
A02	65.07	Block1862	aaxbb	aa	ab	aa	aa	aa	aa	aa	aa	aa	ab	aa	aa	aa	aa	aa	aa	aa	ab	aa	aa	aa	ab	aa	aa	aa	ab	aa	ab	aa	ab	aa	aa	ab	bb	aa	aa	aa	aa	bb	bb	ab	aa	ab	ab	ab	aa
A02	66.352	Block1854	aaxbb	aa	ab	aa	aa	aa	aa	aa	aa	aa	ab	aa	aa	aa	bb	aa	bb	aa	ab	bb	aa	aa	ab	aa	aa	bb	ab	bb	ab	aa	ab	aa	aa	ab	bb	aa	aa	aa	aa	bb	bb	ab	aa	ab	ab	ab	aa
A02	66.852	Block2103	aaxbb	aa	ab	aa	aa	aa	aa	aa	aa	aa	ab	aa	aa	aa	bb	aa	bb	ab	ab	bb	aa	ab	ab	aa	aa	bb	ab	bb	ab	aa	ab	aa	aa	ab	bb	aa	aa	aa	aa	bb	bb	ab	aa	ab	ab	ab	aa
A02	66.852	Block2101	aaxbb	aa	ab	aa	aa	aa	aa	aa	aa	aa	ab	aa	aa	aa	bb	aa	bb	ab	ab	bb	aa	ab	ab	aa	aa	bb	ab	bb	ab	aa	ab	aa	aa	ab	bb	aa	aa	aa	aa	bb	bb	ab	aa	ab	ab	ab	aa
A02	69.455	Block1843	aaxbb	aa	ab	aa	ab	ab	aa	ab	ab	ab	ab	aa	ab	ab	bb	ab	bb	ab	ab	bb	ab	ab	ab	ab	aa	bb	ab	bb	ab	aa	ab	aa	aa	ab	bb	aa	aa	aa	aa	bb	bb	ab	aa	ab	ab	ab	aa
A02	69.705	Block1863	aaxbb	aa	ab	aa	ab	ab	aa	ab	ab	ab	ab	aa	ab	ab	bb	ab	bb	ab	ab	bb	ab	ab	ab	ab	aa	bb	ab	bb	ab	aa	ab	aa	aa	ab	bb	aa	aa	aa	aa	bb	bb	ab	aa	ab	ab	ab	aa
A02	70.205	Block1864	aaxbb	aa	ab	aa	ab	ab	aa	ab	ab	ab	ab	aa	ab	ab	bb	ab	bb	ab	ab	bb	ab	ab	ab	ab	aa	bb	ab	bb	ab	aa	ab	aa	aa	ab	bb	aa	aa	aa	aa	bb	bb	ab	aa	ab	ab	ab	aa
A02	70.455	Block2130	aaxbb	aa	ab	aa	ab	ab	aa	ab	ab	ab	ab	aa	ab	ab	bb	ab	bb	ab	ab	bb	ab	ab	ab	ab	aa	bb	ab	bb	ab	aa	ab	aa	aa	ab	bb	aa	aa	aa	aa	bb	bb	ab	aa	ab	ab	ab	aa
A02	70.705	Block2139	aaxbb	aa	ab	aa	ab	ab	aa	ab	ab	ab	ab	aa	ab	ab	bb	ab	bb	ab	ab	bb	ab	ab	ab	ab	aa	bb	ab	bb	ab	aa	ab	aa	aa	ab	bb	aa	aa	aa	aa	bb	bb	ab	aa	ab	ab	ab	aa
A02	71.205	Block2183	aaxbb	aa	ab	aa	ab	ab	aa	ab	ab	ab	ab	aa	ab	ab	bb	ab	bb	ab	ab	bb	ab	ab	ab	ab	aa	bb	ab	bb	ab	aa	ab	aa	aa	ab	bb	aa	aa	aa	aa	bb	bb	ab	aa	ab	ab	ab	aa
A02	71.205	Block2152	aaxbb	aa	ab	aa	ab	ab	aa	ab	ab	ab	ab	aa	ab	ab	bb	ab	bb	ab	ab	bb	ab	ab	ab	ab	aa	bb	ab	bb	ab	aa	ab	aa	aa	ab	bb	aa	aa	aa	aa	bb	bb	ab	aa	ab	ab	ab	aa
A02	72.205	Block2229	aaxbb	aa	ab	aa	ab	aa	aa	ab	ab	ab	ab	aa	ab	ab	bb	ab	bb	ab	ab	bb	ab	ab	ab	ab	aa	bb	ab	bb	ab	aa	ab	aa	aa	ab	bb	aa	aa	aa	aa	bb	bb	ab	aa	ab	ab	ab	aa
A02	72.205	Block2224	aaxbb	aa	ab	aa	ab	aa	aa	ab	ab	ab	ab	aa	ab	ab	bb	ab	bb	ab	ab	bb	ab	ab	ab	ab	aa	bb	ab	bb	ab	aa	ab	aa	aa	ab	bb	aa	aa	aa	aa	bb	bb	ab	aa	ab	ab	ab	aa
A02	72.955	Block2228	aaxbb	aa	ab	aa	ab	aa	aa	ab	ab	ab	ab	aa	ab	ab	bb	ab	bb	ab	ab	bb	ab	ab	ab	ab	aa	bb	ab	bb	ab	aa	ab	aa	aa	ab	bb	aa	aa	aa	aa	ab	bb	ab	aa	ab	ab	ab	aa
A02	72.955	Block2138	aaxbb	aa	ab	aa	ab	aa	aa	ab	ab	ab	ab	aa	ab	ab	bb	ab	bb	ab	ab	bb	ab	ab	ab	ab	aa	bb	ab	bb	ab	aa	ab	aa	aa	ab	bb	aa	aa	aa	aa	ab	bb	ab	aa	ab	ab	ab	aa
A02	72.955	Block2140	aaxbb	aa	ab	aa	ab	aa	aa	ab	ab	ab	ab	aa	ab	ab	bb	ab	bb	ab	ab	bb	ab	ab	ab	ab	aa	bb	ab	bb	ab	aa	ab	aa	aa	ab	bb	aa	aa	aa	aa	ab	bb	ab	aa	ab	ab	ab	aa
A02	72.955	Block2231	aaxbb	aa	ab	aa	ab	aa	aa	ab	ab	ab	ab	aa	ab	ab	bb	ab	bb	ab	ab	bb	ab	ab	ab	ab	aa	bb	ab	bb	ab	aa	ab	aa	aa	ab	bb	aa	aa	aa	aa	ab	bb	ab	aa	ab	ab	ab	aa
A02	72.955	Block2230	aaxbb	aa	ab	aa	ab	aa	aa	ab	ab	ab	ab	aa	ab	ab	bb	ab	bb	ab	ab	bb	ab	ab	ab	ab	aa	bb	ab	bb	ab	aa	ab	aa	aa	ab	bb	aa	aa	aa	aa	ab	bb	ab	aa	ab	ab	ab	aa
A02	72.955	Block2141	aaxbb	aa	ab	aa	ab	aa	aa	ab	ab	ab	ab	aa	ab	ab	bb	ab	bb	ab	ab	bb	ab	ab	ab	ab	aa	bb	ab	bb	ab	aa	ab	aa	aa	ab	bb	aa	aa	aa	aa	ab	bb	ab	aa	ab	ab	ab	aa
A02	72.955	Block2142	aaxbb	aa	ab	aa	ab	aa	aa	ab	ab	ab	ab	aa	ab	ab	bb	ab	bb	ab	ab	bb	ab	ab	ab	ab	aa	bb	ab	bb	ab	aa	ab	aa	aa	ab	bb	aa	aa	aa	aa	ab	bb	ab	aa	ab	ab	ab	aa
A03	0	Block2398	aaxbb	ab	ab	ab	aa	ab	aa	ab	bb	ab	ab	bb	aa	ab	bb	aa	ab	ab	aa	bb	ab	bb	bb	aa	aa	aa	bb	ab	bb	bb	ab	bb	aa	ab	ab	bb	bb	bb	ab	bb	ab	bb	bb	ab	ab	ab	aa
A03	0	Block2400	aaxbb	ab	ab	ab	aa	ab	aa	ab	bb	ab	ab	bb	aa	ab	bb	aa	ab	ab	aa	bb	ab	bb	bb	aa	aa	aa	bb	ab	bb	bb	ab	bb	aa	ab	ab	bb	bb	bb	ab	bb	ab	bb	bb	ab	ab	ab	aa
A03	0.5	Block2403	aaxbb	ab	ab	ab	aa	ab	aa	ab	bb	ab	ab	bb	aa	ab	bb	aa	ab	ab	aa	bb	ab	ab	bb	aa	aa	aa	bb	ab	bb	bb	ab	bb	aa	aa	ab	bb	bb	bb	ab	bb	ab	bb	bb	ab	ab	ab	aa
A03	0.5	Block2405	aaxbb	ab	ab	ab	aa	ab	aa	ab	bb	ab	ab	bb	aa	ab	bb	aa	ab	ab	aa	bb	ab	ab	bb	aa	aa	aa	bb	ab	bb	bb	ab	bb	aa	aa	ab	bb	bb	bb	ab	bb	ab	bb	bb	ab	ab	ab	aa
A03	0.75	Block2404	aaxbb	ab	ab	ab	aa	ab	aa	ab	bb	ab	ab	bb	aa	ab	bb	aa	ab	ab	aa	bb	ab	ab	bb	aa	aa	aa	bb	ab	bb	bb	ab	bb	aa	aa	ab	bb	bb	bb	ab	bb	ab	bb	bb	ab	ab	ab	aa
A03	1.25	Block2414	aaxbb	ab	ab	ab	aa	ab	aa	ab	bb	ab	ab	bb	aa	ab	bb	aa	ab	ab	aa	bb	ab	ab	bb	aa	ab	aa	bb	ab	bb	bb	ab	bb	aa	aa	ab	bb	bb	bb	ab	bb	ab	bb	bb	ab	ab	ab	aa
A03	1.75	Block2406	aaxbb	ab	ab	ab	aa	ab	aa	ab	bb	ab	ab	bb	aa	ab	bb	aa	ab	ab	aa	bb	ab	ab	bb	aa	ab	aa	bb	ab	bb	bb	ab	bb	aa	aa	ab	bb	bb	bb	ab	bb	ab	bb	bb	ab	ab	ab	aa
A03	1.75	Block2410	aaxbb	ab	ab	ab	aa	ab	aa	ab	bb	ab	ab	bb	aa	ab	bb	aa	ab	ab	aa	bb	ab	ab	bb	aa	ab	aa	bb	ab	bb	bb	ab	bb	aa	aa	ab	bb	bb	bb	ab	bb	ab	bb	bb	ab	ab	ab	aa
A03	1.75	Block2412	aaxbb	ab	ab	ab	aa	ab	aa	ab	bb	ab	ab	bb	aa	ab	bb	aa	ab	ab	aa	bb	ab	ab	bb	aa	ab	aa	bb	ab	bb	bb	ab	bb	aa	aa	ab	bb	bb	bb	ab	bb	ab	bb	bb	ab	ab	ab	aa
A03	2.25	Block2416	aaxbb	ab	ab	ab	aa	ab	aa	ab	bb	ab	ab	bb	aa	ab	bb	aa	ab	ab	aa	bb	ab	ab	bb	aa	ab	aa	bb	ab	bb	bb	ab	bb	aa	aa	ab	bb	bb	bb	ab	bb	ab	bb	bb	ab	ab	ab	aa
A03	2.5	Block2417	aaxbb	ab	ab	ab	aa	ab	aa	ab	bb	ab	ab	bb	aa	ab	bb	aa	ab	ab	aa	bb	ab	ab	bb	aa	bb	aa	bb	ab	bb	bb	ab	bb	aa	aa	ab	bb	bb	bb	ab	bb	ab	bb	bb	ab	ab	ab	aa
A03	2.75	Block2418	aaxbb	ab	ab	ab	aa	ab	aa	ab	bb	ab	ab	bb	aa	ab	bb	aa	ab	ab	aa	ab	ab	ab	bb	aa	bb	aa	bb	ab	bb	bb	ab	bb	aa	aa	ab	bb	bb	bb	ab	bb	ab	bb	bb	ab	ab	ab	aa
A03	3	Block2419	aaxbb	ab	ab	ab	aa	ab	aa	ab	bb	ab	ab	bb	aa	ab	bb	aa	ab	ab	aa	ab	ab	ab	bb	aa	bb	aa	bb	ab	bb	bb	ab	bb	aa	aa	ab	bb	bb	bb	ab	bb	ab	bb	bb	ab	ab	ab	aa
A03	3.25	Block2420	aaxbb	ab	ab	ab	aa	ab	aa	ab	bb	ab	ab	bb	aa	ab	bb	aa	ab	ab	aa	ab	ab	ab	bb	aa	bb	aa	bb	ab	bb	bb	ab	bb	ab	aa	ab	bb	bb	bb	ab	bb	ab	bb	bb	ab	ab	ab	aa
A03	5.051	Block2429	aaxbb	ab	ab	ab	aa	ab	aa	ab	bb	ab	ab	bb	aa	aa	bb	aa	ab	ab	aa	ab	ab	ab	bb	aa	bb	aa	bb	ab	bb	bb	ab	bb	ab	aa	ab	bb	bb	bb	ab	bb	ab	bb	bb	ab	ab	bb	aa
A03	5.051	Block2431	aaxbb	ab	ab	ab	aa	ab	aa	ab	bb	ab	ab	bb	aa	aa	bb	aa	ab	ab	aa	ab	ab	ab	bb	aa	bb	aa	bb	ab	bb	bb	ab	bb	ab	aa	ab	bb	bb	bb	ab	bb	ab	bb	bb	ab	ab	bb	aa
A03	5.301	Block2428	aaxbb	ab	ab	ab	aa	ab	aa	ab	bb	ab	ab	bb	aa	aa	bb	aa	ab	ab	aa	ab	ab	ab	bb	aa	bb	aa	bb	ab	bb	bb	ab	bb	ab	ab	ab	bb	bb	bb	ab	bb	ab	bb	bb	ab	ab	bb	aa
A03	5.301	Block2430	aaxbb	ab	ab	ab	aa	ab	aa	ab	bb	ab	ab	bb	aa	aa	bb	aa	ab	ab	aa	ab	ab	ab	bb	aa	bb	aa	bb	ab	bb	bb	ab	bb	ab	ab	ab	bb	bb	bb	ab	bb	ab	bb	bb	ab	ab	bb	aa
A03	6.051	Block2433	aaxbb	ab	ab	ab	aa	ab	aa	ab	bb	ab	ab	bb	aa	aa	bb	aa	ab	ab	aa	ab	ab	ab	bb	aa	bb	aa	bb	ab	bb	bb	ab	bb	ab	aa	ab	bb	bb	bb	ab	bb	ab	bb	bb	ab	ab	bb	aa
A03	7.051	Block2439	aaxbb	ab	ab	ab	aa	ab	aa	ab	bb	ab	ab	bb	aa	aa	bb	aa	ab	ab	aa	ab	ab	ab	bb	aa	bb	aa	bb	ab	bb	bb	bb	bb	ab	ab	ab	bb	bb	bb	ab	bb	ab	bb	bb	ab	ab	bb	aa
A03	7.301	Block2440	aaxbb	ab	ab	ab	aa	ab	aa	ab	bb	ab	ab	bb	aa	aa	bb	aa	ab	ab	aa	ab	ab	ab	bb	aa	bb	aa	bb	bb	bb	bb	bb	bb	ab	ab	ab	bb	bb	bb	ab	bb	ab	bb	bb	ab	ab	bb	aa
A03	7.551	Block2442	aaxbb	ab	ab	ab	aa	ab	aa	ab	bb	ab	ab	bb	aa	aa	bb	aa	ab	ab	aa	ab	ab	ab	bb	aa	bb	aa	bb	bb	bb	bb	bb	bb	ab	ab	ab	bb	bb	bb	ab	bb	ab	bb	bb	ab	ab	bb	aa
A03	8.051	Block2447	aaxbb	ab	ab	ab	aa	ab	aa	ab	bb	ab	ab	bb	aa	aa	bb	aa	ab	ab	aa	ab	ab	ab	bb	aa	bb	aa	bb	bb	bb	bb	bb	bb	ab	aa	ab	bb	bb	bb	ab	bb	ab	bb	bb	ab	ab	bb	aa
A03	8.301	Block2450	aaxbb	ab	ab	ab	aa	ab	aa	ab	bb	ab	ab	bb	aa	aa	bb	aa	ab	ab	aa	ab	ab	ab	bb	aa	bb	aa	bb	bb	bb	bb	bb	bb	ab	aa	ab	bb	bb	bb	ab	bb	ab	bb	bb	ab	ab	bb	aa
A03	8.801	Block2452	aaxbb	ab	ab	ab	aa	ab	aa	ab	bb	ab	ab	bb	aa	aa	bb	aa	ab	ab	aa	ab	ab	ab	bb	aa	bb	aa	bb	bb	bb	bb	bb	bb	aa	aa	ab	bb	bb	bb	ab	bb	ab	bb	bb	ab	bb	bb	aa
A03	9.051	Block2451	aaxbb	ab	ab	ab	aa	ab	aa	ab	bb	ab	ab	bb	aa	aa	bb	aa	ab	ab	aa	ab	ab	ab	bb	aa	bb	aa	bb	bb	bb	bb	bb	bb	ab	aa	ab	bb	bb	bb	ab	bb	ab	bb	bb	ab	bb	bb	aa
A03	11.353	Block2461	aaxbb	ab	ab	ab	aa	ab	aa	ab	bb	ab	ab	ab	aa	aa	bb	aa	ab	ab	aa	ab	ab	ab	bb	aa	bb	aa	bb	bb	bb	bb	ab	bb	ab	aa	ab	bb	ab	bb	ab	bb	ab	bb	bb	ab	bb	ab	aa
A03	12.353	Block2464	aaxbb	ab	ab	ab	aa	ab	aa	ab	bb	ab	ab	ab	aa	aa	bb	aa	ab	ab	aa	ab	ab	ab	bb	aa	bb	aa	bb	bb	bb	bb	bb	bb	ab	aa	ab	bb	bb	bb	ab	bb	ab	bb	bb	ab	bb	ab	aa
A03	12.603	Block2465	aaxbb	ab	ab	ab	aa	ab	aa	ab	bb	ab	ab	ab	aa	aa	bb	aa	ab	ab	aa	ab	ab	ab	bb	aa	bb	aa	bb	bb	bb	bb	bb	bb	aa	aa	ab	bb	bb	bb	ab	bb	ab	bb	bb	ab	bb	ab	aa
A03	12.853	Block2466	aaxbb	ab	ab	ab	aa	ab	aa	ab	bb	ab	ab	ab	aa	aa	bb	aa	ab	ab	aa	ab	ab	ab	bb	aa	bb	aa	bb	bb	bb	bb	bb	bb	aa	aa	ab	bb	bb	bb	ab	bb	ab	bb	bb	ab	bb	ab	aa
A03	13.103	Block2467	aaxbb	ab	ab	ab	aa	ab	ab	ab	bb	ab	ab	ab	aa	aa	bb	aa	ab	ab	aa	ab	ab	ab	bb	aa	bb	aa	bb	bb	bb	bb	bb	bb	aa	aa	ab	bb	bb	bb	ab	bb	ab	bb	bb	ab	bb	ab	aa
A03	13.353	Block2468	aaxbb	ab	ab	ab	aa	ab	ab	ab	bb	ab	ab	ab	aa	aa	bb	aa	ab	ab	aa	ab	ab	ab	bb	aa	bb	aa	bb	bb	bb	bb	bb	bb	ab	aa	ab	bb	bb	bb	ab	bb	ab	bb	bb	ab	bb	ab	aa
A03	13.603	Block2469	aaxbb	ab	ab	ab	aa	ab	ab	ab	bb	ab	ab	ab	aa	aa	bb	aa	ab	ab	ab	ab	ab	ab	bb	aa	bb	aa	bb	bb	bb	bb	bb	bb	ab	aa	ab	bb	bb	bb	ab	bb	ab	bb	bb	ab	bb	ab	aa
A03	13.603	Block2471	aaxbb	ab	ab	ab	aa	ab	ab	ab	bb	ab	ab	ab	aa	aa	bb	aa	ab	ab	ab	ab	ab	ab	bb	aa	bb	aa	bb	bb	bb	bb	bb	bb	ab	aa	ab	bb	bb	bb	ab	bb	ab	bb	bb	ab	bb	ab	aa
A03	14.103	Block2481	aaxbb	ab	ab	ab	aa	ab	ab	ab	bb	ab	ab	ab	aa	aa	bb	aa	ab	ab	ab	ab	ab	ab	bb	aa	bb	aa	bb	bb	bb	bb	bb	bb	ab	aa	ab	bb	bb	bb	ab	bb	ab	bb	bb	ab	bb	ab	aa
A03	15.904	Block2494	aaxbb	ab	ab	bb	aa	ab	ab	ab	bb	ab	ab	ab	aa	aa	bb	ab	ab	ab	ab	ab	ab	ab	bb	aa	bb	aa	bb	bb	bb	bb	bb	bb	ab	aa	ab	bb	ab	bb	ab	bb	ab	bb	bb	ab	bb	ab	aa
A03	15.904	Block2495	aaxbb	ab	ab	bb	aa	ab	ab	ab	bb	ab	ab	ab	aa	aa	bb	ab	ab	ab	ab	ab	ab	ab	bb	aa	bb	aa	bb	bb	bb	bb	bb	bb	ab	aa	ab	bb	ab	bb	ab	bb	ab	bb	bb	ab	bb	ab	aa
A03	16.154	Block2497	aaxbb	ab	ab	bb	aa	ab	ab	ab	bb	ab	ab	ab	aa	aa	bb	ab	ab	ab	ab	ab	ab	ab	bb	aa	bb	aa	bb	bb	bb	bb	bb	bb	ab	aa	ab	bb	ab	bb	ab	bb	ab	bb	bb	ab	bb	ab	aa
A03	16.654	Block2505	aaxbb	ab	ab	bb	aa	ab	ab	ab	bb	ab	ab	ab	aa	aa	bb	ab	ab	ab	ab	ab	ab	ab	bb	aa	bb	aa	bb	bb	bb	bb	bb	bb	ab	aa	ab	bb	ab	bb	ab	bb	ab	bb	bb	ab	bb	ab	aa
A03	16.904	Block2500	aaxbb	ab	ab	bb	aa	ab	ab	ab	bb	ab	ab	ab	aa	aa	bb	ab	ab	ab	ab	ab	ab	ab	bb	aa	bb	aa	bb	bb	bb	bb	bb	bb	aa	aa	ab	bb	ab	bb	ab	bb	ab	bb	bb	ab	bb	ab	aa
A03	16.904	Block2502	aaxbb	ab	ab	bb	aa	ab	ab	ab	bb	ab	ab	ab	aa	aa	bb	ab	ab	ab	ab	ab	ab	ab	bb	aa	bb	aa	bb	bb	bb	bb	bb	bb	aa	aa	ab	bb	ab	bb	ab	bb	ab	bb	bb	ab	bb	ab	aa
A03	17.154	Block2507	aaxbb	ab	ab	bb	aa	ab	ab	ab	bb	ab	ab	ab	aa	aa	bb	ab	ab	ab	ab	ab	ab	ab	bb	aa	bb	aa	bb	bb	bb	bb	bb	bb	aa	aa	ab	bb	ab	bb	ab	bb	ab	bb	bb	ab	bb	ab	aa
A03	17.404	Block2506	aaxbb	ab	ab	bb	aa	ab	ab	ab	bb	ab	ab	ab	aa	aa	bb	ab	ab	ab	ab	ab	ab	ab	bb	aa	bb	aa	bb	bb	bb	bb	bb	bb	ab	aa	ab	bb	ab	bb	ab	bb	ab	bb	bb	ab	bb	ab	aa
A03	19.455	Block2513	aaxbb	ab	ab	bb	aa	ab	ab	ab	bb	ab	ab	ab	aa	aa	bb	ab	ab	ab	ab	ab	ab	ab	bb	aa	bb	aa	bb	bb	bb	bb	bb	bb	ab	aa	ab	bb	ab	bb	ab	bb	ab	bb	bb	ab	bb	ab	aa
A03	20.705	Block2518	aaxbb	ab	ab	bb	aa	ab	ab	ab	bb	ab	ab	ab	aa	aa	bb	ab	bb	ab	ab	ab	ab	ab	bb	aa	bb	aa	bb	bb	bb	bb	bb	bb	ab	aa	ab	bb	ab	bb	ab	bb	ab	bb	bb	ab	bb	ab	aa
A03	20.705	Block2519	aaxbb	ab	ab	bb	aa	ab	ab	ab	bb	ab	ab	ab	aa	aa	bb	ab	bb	ab	ab	ab	ab	ab	bb	aa	bb	aa	bb	bb	bb	bb	bb	bb	ab	aa	ab	bb	ab	bb	ab	bb	ab	bb	bb	ab	bb	ab	aa
A03	21.455	Block2522	aaxbb	ab	ab	bb	aa	ab	ab	ab	bb	ab	ab	ab	aa	aa	bb	ab	bb	ab	ab	ab	ab	ab	bb	aa	bb	aa	bb	bb	bb	bb	bb	bb	ab	aa	ab	bb	ab	bb	ab	bb	ab	bb	bb	ab	bb	ab	aa
A03	21.705	Block2523	aaxbb	ab	ab	bb	aa	ab	ab	ab	bb	ab	ab	ab	aa	aa	bb	ab	bb	ab	ab	ab	ab	ab	bb	aa	bb	aa	bb	bb	bb	bb	bb	bb	ab	aa	ab	bb	ab	bb	ab	bb	ab	bb	bb	ab	bb	ab	aa
A03	21.955	Block2524	aaxbb	ab	ab	bb	aa	ab	ab	ab	bb	ab	ab	ab	aa	aa	bb	ab	bb	ab	ab	ab	ab	ab	bb	aa	bb	aa	bb	bb	bb	bb	bb	bb	ab	aa	ab	bb	ab	bb	ab	bb	ab	bb	bb	ab	bb	ab	aa
A03	22.205	Block2525	aaxbb	ab	ab	bb	aa	ab	ab	ab	bb	ab	ab	ab	aa	aa	bb	ab	bb	ab	ab	ab	ab	ab	bb	aa	bb	aa	bb	bb	bb	bb	bb	bb	ab	aa	ab	bb	ab	bb	ab	bb	ab	bb	bb	ab	bb	ab	aa
A03	22.205	Block2526	aaxbb	ab	ab	bb	aa	ab	ab	ab	bb	ab	ab	ab	aa	aa	bb	ab	bb	ab	ab	ab	ab	ab	bb	aa	bb	aa	bb	bb	bb	bb	bb	bb	ab	aa	ab	bb	ab	bb	ab	bb	ab	bb	bb	ab	bb	ab	aa
A03	22.205	Block2527	aaxbb	ab	ab	bb	aa	ab	ab	ab	bb	ab	ab	ab	aa	aa	bb	ab	bb	ab	ab	ab	ab	ab	bb	aa	bb	aa	bb	bb	bb	bb	bb	bb	ab	aa	ab	bb	ab	bb	ab	bb	ab	bb	bb	ab	bb	ab	aa
A03	22.455	Block2528	aaxbb	ab	ab	bb	aa	ab	ab	ab	bb	ab	ab	ab	aa	aa	bb	ab	bb	ab	ab	ab	ab	ab	bb	aa	bb	aa	bb	bb	bb	bb	bb	bb	ab	aa	ab	bb	ab	bb	ab	bb	ab	bb	bb	ab	bb	ab	aa
A03	22.705	Block2529	aaxbb	ab	ab	bb	aa	ab	ab	ab	bb	ab	ab	ab	aa	aa	bb	ab	bb	ab	ab	ab	ab	ab	bb	aa	bb	aa	bb	bb	bb	bb	bb	bb	ab	aa	ab	bb	ab	bb	ab	bb	ab	bb	bb	ab	bb	ab	aa
A03	22.955	Block2530	aaxbb	ab	ab	bb	aa	ab	ab	ab	bb	ab	ab	ab	aa	aa	bb	ab	bb	ab	ab	ab	ab	ab	bb	aa	bb	aa	bb	bb	bb	bb	bb	bb	ab	aa	ab	bb	ab	bb	ab	bb	ab	bb	bb	ab	bb	ab	aa
A03	23.205	Block2532	aaxbb	ab	ab	bb	aa	ab	ab	ab	bb	ab	ab	ab	aa	aa	bb	ab	bb	ab	ab	ab	ab	ab	bb	aa	bb	aa	bb	bb	bb	bb	bb	bb	ab	aa	ab	bb	ab	bb	ab	bb	ab	bb	bb	ab	bb	ab	aa
A03	23.455	Block2534	aaxbb	ab	ab	bb	aa	ab	ab	aa	bb	ab	ab	ab	aa	aa	bb	ab	bb	ab	ab	ab	ab	ab	bb	aa	bb	aa	bb	bb	bb	bb	bb	bb	ab	aa	ab	bb	ab	bb	ab	bb	ab	bb	bb	ab	bb	ab	aa
A03	23.955	Block2536	aaxbb	ab	ab	bb	aa	ab	ab	aa	bb	ab	ab	ab	aa	aa	bb	ab	bb	ab	ab	ab	ab	ab	bb	aa	bb	aa	bb	bb	bb	bb	bb	bb	ab	aa	ab	bb	ab	bb	ab	bb	ab	bb	bb	ab	bb	ab	aa
A03	23.955	Block2538	aaxbb	ab	ab	bb	aa	ab	ab	aa	bb	ab	ab	ab	aa	aa	bb	ab	bb	ab	ab	ab	ab	ab	bb	aa	bb	aa	bb	bb	bb	bb	bb	bb	ab	aa	ab	bb	ab	bb	ab	bb	ab	bb	bb	ab	bb	ab	aa
A03	24.455	Block2540	aaxbb	ab	ab	bb	aa	ab	ab	aa	bb	ab	ab	ab	aa	aa	bb	ab	bb	ab	ab	ab	ab	ab	bb	aa	bb	aa	bb	bb	bb	bb	bb	bb	ab	aa	ab	bb	ab	bb	ab	ab	ab	bb	bb	ab	bb	ab	aa
A03	24.955	Block2542	aaxbb	ab	ab	bb	aa	ab	ab	aa	bb	ab	ab	ab	aa	aa	bb	ab	bb	ab	ab	ab	ab	ab	bb	ab	bb	aa	bb	bb	bb	bb	bb	bb	ab	aa	ab	bb	ab	bb	ab	ab	ab	bb	bb	ab	bb	ab	aa
A03	24.955	Block2544	aaxbb	ab	ab	bb	aa	ab	ab	aa	bb	ab	ab	ab	aa	aa	bb	ab	bb	ab	ab	ab	ab	ab	bb	ab	bb	aa	bb	bb	bb	bb	bb	bb	ab	aa	ab	bb	ab	bb	ab	ab	ab	bb	bb	ab	bb	ab	aa
A03	25.205	Block2545	aaxbb	ab	ab	bb	aa	ab	ab	aa	bb	ab	ab	ab	aa	aa	bb	ab	bb	ab	ab	ab	ab	ab	bb	ab	bb	aa	bb	bb	bb	bb	bb	bb	ab	ab	ab	bb	ab	bb	ab	ab	ab	bb	bb	ab	bb	ab	aa
A03	25.205	Block2549	aaxbb	ab	ab	bb	aa	ab	ab	aa	bb	ab	ab	ab	aa	aa	bb	ab	bb	ab	ab	ab	ab	ab	bb	ab	bb	aa	bb	bb	bb	bb	bb	bb	ab	ab	ab	bb	ab	bb	ab	ab	ab	bb	bb	ab	bb	ab	aa
A03	25.705	Block2543	aaxbb	ab	ab	bb	aa	ab	ab	aa	bb	ab	ab	ab	aa	aa	bb	ab	bb	ab	ab	ab	ab	ab	bb	ab	bb	aa	bb	bb	bb	bb	bb	bb	ab	aa	ab	bb	ab	bb	ab	ab	ab	bb	bb	ab	bb	ab	aa
A03	25.705	Block2547	aaxbb	ab	ab	bb	aa	ab	ab	aa	bb	ab	ab	ab	aa	aa	bb	ab	bb	ab	ab	ab	ab	ab	bb	ab	bb	aa	bb	bb	bb	bb	bb	bb	ab	aa	ab	bb	ab	bb	ab	ab	ab	bb	bb	ab	bb	ab	aa
A03	26.455	Block2552	aaxbb	ab	ab	bb	aa	ab	ab	aa	bb	ab	ab	ab	aa	aa	bb	ab	bb	ab	ab	ab	ab	ab	bb	ab	bb	aa	bb	bb	bb	bb	bb	bb	ab	aa	ab	bb	ab	bb	ab	ab	ab	bb	bb	ab	bb	ab	aa
A03	26.955	Block2554	aaxbb	ab	ab	bb	aa	ab	ab	aa	bb	ab	ab	ab	aa	aa	bb	ab	bb	ab	ab	ab	ab	ab	bb	ab	bb	aa	bb	bb	bb	bb	bb	bb	ab	aa	ab	bb	ab	ab	ab	ab	ab	bb	bb	ab	bb	ab	aa
A03	27.205	Block2555	aaxbb	ab	ab	bb	aa	ab	ab	aa	bb	ab	ab	ab	aa	aa	bb	ab	bb	ab	ab	ab	ab	ab	bb	ab	bb	aa	bb	bb	bb	bb	bb	bb	ab	aa	ab	bb	ab	ab	ab	ab	ab	bb	bb	ab	bb	ab	aa
A03	27.955	Block2558	aaxbb	ab	ab	bb	aa	ab	ab	aa	bb	ab	ab	ab	aa	aa	bb	ab	bb	ab	ab	ab	ab	ab	bb	ab	bb	aa	bb	bb	bb	bb	bb	bb	ab	aa	ab	bb	ab	ab	ab	ab	ab	bb	bb	ab	bb	ab	aa
A03	28.455	Block2569	aaxbb	ab	ab	bb	aa	ab	ab	aa	bb	ab	ab	ab	aa	aa	bb	ab	bb	ab	ab	ab	ab	ab	bb	ab	bb	aa	bb	bb	bb	bb	bb	bb	ab	aa	ab	bb	ab	ab	ab	ab	ab	bb	bb	ab	bb	ab	aa
A03	28.455	Block2570	aaxbb	ab	ab	bb	aa	ab	ab	aa	bb	ab	ab	ab	aa	aa	bb	ab	bb	ab	ab	ab	ab	ab	bb	ab	bb	aa	bb	bb	bb	bb	bb	bb	ab	aa	ab	bb	ab	ab	ab	ab	ab	bb	bb	ab	bb	ab	aa
A03	28.705	Block2571	aaxbb	ab	ab	bb	aa	ab	ab	aa	bb	ab	ab	ab	aa	aa	bb	ab	bb	ab	ab	ab	ab	ab	bb	ab	bb	aa	bb	bb	bb	bb	bb	bb	ab	aa	ab	bb	ab	ab	ab	ab	ab	bb	bb	ab	bb	ab	aa
A03	29.205	Block2573	aaxbb	ab	ab	bb	aa	ab	ab	aa	bb	ab	ab	ab	aa	aa	bb	ab	bb	ab	ab	ab	ab	ab	bb	ab	bb	aa	bb	bb	bb	bb	bb	bb	ab	aa	ab	bb	ab	ab	ab	ab	ab	bb	bb	ab	bb	ab	aa
A03	29.455	Block2574	aaxbb	ab	ab	bb	aa	ab	ab	aa	bb	ab	ab	ab	aa	aa	bb	ab	bb	ab	ab	ab	ab	ab	bb	ab	bb	aa	bb	bb	bb	bb	bb	bb	ab	aa	ab	bb	ab	ab	ab	ab	ab	bb	bb	ab	bb	ab	aa
A03	29.955	Block2578	aaxbb	ab	ab	bb	aa	ab	ab	aa	bb	ab	ab	ab	aa	aa	bb	ab	bb	ab	ab	ab	ab	ab	bb	ab	bb	aa	bb	bb	bb	bb	bb	bb	ab	ab	ab	bb	ab	ab	ab	ab	ab	bb	bb	ab	bb	ab	aa
A03	30.205	Block2579	aaxbb	ab	ab	bb	aa	ab	ab	aa	bb	ab	ab	ab	aa	aa	bb	ab	bb	ab	ab	ab	ab	ab	bb	ab	bb	aa	bb	bb	bb	bb	bb	bb	ab	aa	ab	bb	ab	ab	ab	ab	ab	bb	bb	ab	bb	ab	aa
A03	30.705	Block2581	aaxbb	ab	ab	bb	aa	bb	ab	aa	bb	ab	ab	ab	aa	aa	bb	ab	bb	ab	ab	ab	ab	ab	bb	ab	bb	aa	bb	bb	bb	bb	bb	bb	ab	aa	ab	bb	ab	ab	ab	ab	ab	bb	bb	ab	bb	ab	aa
A03	31.455	Block2583	aaxbb	ab	ab	bb	aa	bb	ab	aa	bb	ab	ab	ab	aa	aa	bb	ab	bb	ab	ab	ab	ab	ab	bb	ab	bb	aa	bb	bb	bb	bb	bb	bb	ab	ab	ab	bb	ab	ab	ab	ab	ab	bb	bb	ab	bb	ab	aa
A03	31.956	Block2585	aaxbb	ab	ab	bb	aa	bb	ab	aa	bb	ab	ab	ab	aa	aa	bb	ab	bb	ab	ab	ab	ab	ab	bb	ab	bb	aa	bb	bb	bb	bb	bb	bb	ab	aa	ab	bb	ab	ab	ab	ab	ab	bb	bb	ab	bb	ab	aa
A03	32.456	Block2587	aaxbb	ab	ab	bb	aa	bb	ab	aa	bb	ab	ab	ab	aa	aa	bb	ab	bb	ab	ab	ab	ab	ab	bb	ab	bb	aa	bb	bb	bb	bb	bb	bb	ab	aa	ab	bb	ab	ab	ab	ab	ab	bb	bb	ab	bb	ab	aa
A03	33.706	Block2590	aaxbb	ab	ab	bb	aa	bb	ab	aa	bb	ab	ab	ab	aa	aa	bb	ab	bb	ab	ab	ab	ab	ab	bb	bb	bb	aa	bb	bb	bb	bb	bb	bb	ab	aa	ab	bb	ab	ab	bb	ab	ab	bb	bb	ab	bb	ab	aa
A03	33.956	Block2591	aaxbb	ab	ab	bb	aa	bb	ab	aa	bb	ab	ab	ab	aa	aa	bb	ab	bb	ab	ab	ab	ab	ab	bb	bb	bb	aa	bb	bb	bb	bb	bb	bb	ab	aa	ab	bb	ab	ab	bb	ab	ab	bb	bb	ab	bb	ab	aa
A03	34.206	Block2592	aaxbb	ab	ab	bb	aa	bb	ab	aa	bb	ab	ab	ab	aa	aa	bb	ab	bb	ab	ab	ab	ab	ab	bb	bb	bb	aa	bb	bb	bb	bb	bb	bb	ab	ab	ab	bb	ab	ab	bb	ab	ab	bb	bb	ab	bb	ab	aa
A03	34.456	Block2593	aaxbb	ab	ab	bb	aa	bb	ab	aa	bb	ab	ab	ab	aa	aa	bb	ab	bb	ab	ab	ab	ab	ab	bb	bb	bb	aa	bb	bb	bb	bb	bb	bb	ab	ab	ab	bb	ab	ab	bb	ab	ab	bb	bb	ab	bb	ab	aa
A03	34.956	Block2595	aaxbb	ab	ab	bb	aa	bb	ab	aa	bb	ab	ab	ab	aa	aa	bb	ab	bb	ab	ab	ab	ab	ab	bb	bb	bb	aa	bb	bb	bb	bb	bb	ab	ab	ab	ab	bb	ab	ab	bb	ab	ab	bb	bb	ab	bb	ab	aa
A03	34.956	Block2597	aaxbb	ab	ab	bb	aa	bb	ab	aa	bb	ab	ab	ab	aa	aa	bb	ab	bb	ab	ab	ab	ab	ab	bb	bb	bb	aa	bb	bb	bb	bb	bb	ab	ab	ab	ab	bb	ab	ab	bb	ab	ab	bb	bb	ab	bb	ab	aa
A03	34.956	Block2598	aaxbb	ab	ab	bb	aa	bb	ab	aa	bb	ab	ab	ab	aa	aa	bb	ab	bb	ab	ab	ab	ab	ab	bb	bb	bb	aa	bb	bb	bb	bb	bb	ab	ab	ab	ab	bb	ab	ab	bb	ab	ab	bb	bb	ab	bb	ab	aa
A03	34.956	Block2599	aaxbb	ab	ab	bb	aa	bb	ab	aa	bb	ab	ab	ab	aa	aa	bb	ab	bb	ab	ab	ab	ab	ab	bb	bb	bb	aa	bb	bb	bb	bb	bb	ab	ab	ab	ab	bb	ab	ab	bb	ab	ab	bb	bb	ab	bb	ab	aa
A03	35.206	Block2600	aaxbb	ab	ab	bb	aa	bb	ab	aa	bb	ab	ab	ab	aa	aa	bb	ab	bb	ab	ab	ab	ab	ab	bb	bb	bb	aa	bb	bb	bb	bb	bb	ab	ab	ab	ab	bb	ab	ab	bb	ab	ab	bb	bb	ab	bb	ab	aa
A03	35.706	Block2606	aaxbb	ab	ab	bb	aa	bb	ab	aa	bb	ab	ab	ab	aa	aa	bb	ab	bb	ab	ab	ab	ab	ab	bb	bb	bb	aa	bb	bb	bb	bb	bb	ab	ab	ab	ab	bb	ab	ab	bb	ab	ab	bb	bb	ab	bb	ab	aa
A03	35.956	Block2605	aaxbb	ab	ab	bb	aa	bb	ab	aa	bb	ab	ab	ab	aa	aa	bb	ab	bb	ab	ab	ab	ab	ab	bb	bb	bb	aa	bb	bb	bb	bb	bb	ab	ab	ab	ab	bb	ab	ab	bb	ab	ab	bb	bb	ab	bb	ab	aa
A03	36.206	Block2604	aaxbb	ab	ab	bb	aa	bb	ab	aa	bb	ab	ab	ab	aa	aa	bb	ab	bb	ab	ab	ab	ab	ab	bb	bb	bb	aa	bb	bb	bb	bb	bb	ab	ab	ab	ab	bb	ab	ab	bb	ab	ab	bb	bb	ab	bb	ab	aa
A03	36.456	Block2609	aaxbb	ab	ab	ab	aa	bb	ab	aa	bb	ab	ab	ab	aa	aa	bb	ab	bb	ab	ab	ab	ab	ab	bb	bb	bb	aa	bb	bb	bb	bb	bb	ab	ab	ab	ab	bb	ab	ab	bb	ab	ab	bb	bb	ab	bb	ab	aa
A03	36.706	Block2610	aaxbb	ab	ab	ab	aa	bb	ab	aa	bb	ab	ab	ab	aa	aa	bb	ab	bb	ab	ab	ab	ab	ab	bb	bb	bb	aa	bb	bb	bb	bb	bb	ab	ab	ab	ab	bb	ab	ab	bb	ab	ab	bb	bb	ab	bb	ab	aa
A03	36.956	Block2611	aaxbb	ab	ab	ab	aa	bb	ab	aa	bb	ab	ab	ab	aa	aa	bb	ab	bb	ab	ab	ab	ab	ab	bb	bb	bb	aa	bb	bb	bb	bb	bb	ab	ab	ab	ab	bb	ab	ab	bb	ab	ab	bb	bb	ab	bb	ab	aa
A03	37.706	Block2614	aaxbb	ab	ab	ab	aa	bb	ab	aa	bb	ab	ab	ab	aa	aa	bb	ab	bb	bb	ab	ab	ab	ab	bb	bb	bb	aa	bb	bb	bb	bb	bb	ab	ab	ab	ab	bb	ab	ab	bb	ab	ab	bb	bb	ab	bb	ab	aa
A03	38.206	Block2618	aaxbb	ab	ab	ab	aa	bb	ab	aa	bb	ab	ab	ab	aa	aa	ab	ab	bb	bb	ab	ab	ab	ab	bb	bb	bb	aa	bb	bb	bb	bb	bb	ab	ab	ab	bb	bb	ab	ab	bb	ab	ab	bb	bb	ab	bb	ab	aa
A03	38.456	Block2619	aaxbb	ab	ab	ab	aa	bb	ab	aa	bb	ab	ab	ab	aa	aa	ab	ab	bb	bb	ab	ab	ab	ab	bb	bb	bb	aa	bb	bb	bb	bb	bb	ab	ab	ab	bb	bb	ab	ab	bb	ab	ab	bb	bb	ab	bb	ab	ab
A03	38.706	Block2620	aaxbb	ab	ab	ab	aa	bb	ab	aa	bb	ab	ab	ab	aa	aa	ab	ab	ab	bb	ab	ab	ab	ab	bb	bb	bb	aa	bb	bb	bb	bb	bb	ab	ab	ab	bb	bb	ab	ab	bb	ab	ab	bb	bb	ab	bb	ab	ab
A03	38.706	Block2621	aaxbb	ab	ab	ab	aa	bb	ab	aa	bb	ab	ab	ab	aa	aa	ab	ab	ab	bb	ab	ab	ab	ab	bb	bb	bb	aa	bb	bb	bb	bb	bb	ab	ab	ab	bb	bb	ab	ab	bb	ab	ab	bb	bb	ab	bb	ab	ab
A03	38.956	Block2623	aaxbb	ab	ab	ab	aa	bb	ab	aa	bb	ab	ab	ab	aa	ab	ab	ab	ab	bb	ab	ab	ab	ab	bb	bb	bb	aa	bb	bb	bb	bb	bb	ab	ab	ab	bb	bb	ab	ab	bb	ab	ab	bb	bb	ab	bb	ab	ab
A03	39.206	Block2637	aaxbb	ab	ab	ab	aa	bb	ab	aa	bb	ab	ab	ab	aa	ab	ab	ab	ab	bb	ab	ab	ab	ab	bb	bb	bb	aa	bb	bb	bb	bb	bb	ab	ab	ab	bb	bb	ab	ab	bb	ab	aa	bb	bb	ab	bb	ab	ab
A03	39.456	Block2638	aaxbb	ab	ab	ab	aa	bb	ab	aa	bb	ab	ab	ab	aa	ab	ab	ab	ab	bb	ab	ab	ab	ab	bb	bb	bb	aa	bb	bb	bb	bb	bb	ab	ab	ab	bb	bb	ab	ab	bb	ab	aa	bb	bb	ab	bb	ab	ab
A03	39.706	Block2641	aaxbb	ab	ab	ab	aa	bb	ab	aa	bb	ab	ab	ab	aa	ab	ab	ab	ab	bb	ab	ab	ab	ab	bb	bb	bb	aa	bb	bb	bb	bb	bb	ab	ab	ab	bb	bb	ab	ab	bb	ab	aa	bb	bb	ab	bb	ab	ab
A03	39.956	Block2642	aaxbb	ab	ab	ab	aa	bb	ab	aa	bb	aa	ab	ab	aa	ab	ab	ab	ab	bb	ab	ab	ab	ab	bb	bb	bb	aa	bb	bb	bb	bb	bb	ab	ab	ab	bb	bb	ab	ab	bb	ab	aa	bb	bb	ab	bb	ab	ab
A03	39.956	Block2643	aaxbb	ab	ab	ab	aa	bb	ab	aa	bb	aa	ab	ab	aa	ab	ab	ab	ab	bb	ab	ab	ab	ab	bb	bb	bb	aa	bb	bb	bb	bb	bb	ab	ab	ab	bb	bb	ab	ab	bb	ab	aa	bb	bb	ab	bb	ab	ab
A03	39.956	Block2644	aaxbb	ab	ab	ab	aa	bb	ab	aa	bb	aa	ab	ab	aa	ab	ab	ab	ab	bb	ab	ab	ab	ab	bb	bb	bb	aa	bb	bb	bb	bb	bb	ab	ab	ab	bb	bb	ab	ab	bb	ab	aa	bb	bb	ab	bb	ab	ab
A03	40.456	Block2646	aaxbb	ab	ab	ab	aa	bb	ab	aa	bb	aa	ab	ab	aa	ab	ab	ab	ab	bb	ab	ab	ab	ab	bb	bb	bb	aa	bb	bb	bb	bb	bb	ab	ab	ab	bb	bb	ab	ab	bb	ab	aa	bb	bb	ab	bb	ab	ab
A03	40.706	Block2647	aaxbb	ab	ab	ab	aa	bb	ab	aa	bb	aa	ab	ab	aa	ab	aa	ab	ab	bb	ab	ab	ab	ab	bb	bb	bb	aa	bb	bb	bb	bb	bb	ab	ab	ab	bb	bb	ab	ab	bb	ab	aa	bb	bb	ab	bb	ab	ab
A03	41.206	Block2653	aaxbb	ab	ab	ab	aa	bb	ab	aa	bb	aa	ab	ab	aa	ab	aa	ab	ab	bb	ab	ab	ab	ab	bb	bb	bb	aa	bb	bb	bb	bb	bb	ab	ab	ab	bb	bb	ab	ab	bb	ab	aa	bb	bb	ab	bb	ab	ab
A03	41.206	Block2657	aaxbb	ab	ab	ab	aa	bb	ab	aa	bb	aa	ab	ab	aa	ab	aa	ab	ab	bb	ab	ab	ab	ab	bb	bb	bb	aa	bb	bb	bb	bb	bb	ab	ab	ab	bb	bb	ab	ab	bb	ab	aa	bb	bb	ab	bb	ab	ab
A03	41.206	Block2659	aaxbb	ab	ab	ab	aa	bb	ab	aa	bb	aa	ab	ab	aa	ab	aa	ab	ab	bb	ab	ab	ab	ab	bb	bb	bb	aa	bb	bb	bb	bb	bb	ab	ab	ab	bb	bb	ab	ab	bb	ab	aa	bb	bb	ab	bb	ab	ab
A03	41.456	Block2652	aaxbb	ab	ab	ab	aa	bb	ab	aa	bb	aa	ab	ab	aa	ab	aa	ab	ab	bb	ab	ab	ab	ab	bb	bb	bb	aa	bb	bb	bb	bb	bb	ab	ab	ab	bb	bb	ab	ab	bb	ab	aa	bb	bb	ab	bb	ab	ab
A03	41.956	Block2662	aaxbb	ab	ab	ab	aa	bb	ab	aa	bb	aa	ab	ab	aa	ab	aa	ab	ab	bb	ab	ab	ab	ab	bb	bb	bb	aa	bb	bb	bb	bb	bb	ab	ab	ab	bb	bb	ab	ab	bb	ab	aa	bb	bb	ab	bb	ab	ab
A03	42.206	Block2663	aaxbb	ab	ab	ab	aa	bb	ab	aa	bb	aa	ab	ab	aa	ab	aa	ab	ab	bb	ab	ab	ab	ab	bb	bb	bb	aa	bb	bb	ab	bb	bb	ab	ab	ab	bb	bb	ab	ab	bb	ab	aa	bb	bb	ab	bb	ab	ab
A03	42.456	Block2664	aaxbb	ab	ab	ab	aa	bb	ab	aa	bb	aa	ab	ab	aa	ab	aa	ab	ab	bb	ab	ab	ab	ab	bb	bb	bb	aa	bb	bb	ab	ab	bb	ab	ab	ab	bb	bb	ab	ab	bb	ab	aa	bb	bb	ab	bb	ab	ab
A03	42.456	Block2666	aaxbb	ab	ab	ab	aa	bb	ab	aa	bb	aa	ab	ab	aa	ab	aa	ab	ab	bb	ab	ab	ab	ab	bb	bb	bb	aa	bb	bb	ab	ab	bb	ab	ab	ab	bb	bb	ab	ab	bb	ab	aa	bb	bb	ab	bb	ab	ab
A03	42.706	Block2667	aaxbb	ab	ab	ab	aa	bb	ab	aa	bb	aa	ab	ab	aa	ab	aa	ab	ab	bb	ab	ab	ab	ab	bb	bb	bb	aa	bb	bb	ab	ab	bb	ab	ab	ab	bb	bb	ab	ab	bb	ab	aa	bb	bb	ab	bb	ab	ab
A03	42.956	Block2668	aaxbb	ab	ab	ab	aa	bb	ab	aa	bb	aa	ab	ab	aa	ab	aa	ab	ab	bb	bb	ab	ab	ab	bb	bb	bb	aa	bb	bb	ab	ab	bb	ab	ab	ab	bb	bb	ab	ab	bb	ab	aa	bb	bb	ab	bb	ab	ab
A03	43.206	Block2669	aaxbb	ab	ab	ab	aa	bb	ab	aa	bb	aa	ab	ab	aa	ab	aa	ab	ab	bb	bb	ab	ab	ab	bb	bb	bb	aa	bb	bb	ab	ab	bb	ab	ab	ab	bb	bb	ab	ab	bb	ab	aa	bb	bb	ab	bb	ab	ab
A03	47.12	Block2678	aaxbb	aa	aa	aa	aa	aa	aa	aa	aa	aa	aa	aa	aa	aa	aa	aa	aa	aa	aa	aa	aa	aa	aa	aa	aa	aa	aa	aa	ab	ab	bb	ab	ab	ab	bb	bb	ab	ab	bb	ab	aa	bb	bb	ab	bb	ab	ab
A03	47.37	Block2679	aaxbb	aa	aa	aa	aa	aa	aa	aa	aa	aa	aa	aa	aa	aa	aa	aa	aa	aa	aa	aa	aa	aa	aa	aa	aa	aa	aa	aa	ab	ab	bb	ab	ab	ab	bb	bb	ab	ab	ab	ab	aa	bb	bb	ab	bb	ab	ab
A03	48.12	Block2682	aaxbb	aa	ab	aa	aa	aa	aa	aa	aa	aa	aa	aa	aa	aa	aa	aa	aa	aa	aa	aa	aa	aa	aa	aa	aa	aa	aa	aa	ab	ab	bb	ab	ab	ab	bb	bb	ab	ab	ab	ab	aa	bb	bb	ab	bb	ab	ab
A03	48.12	Block2684	aaxbb	aa	ab	aa	aa	aa	aa	aa	aa	aa	aa	aa	aa	aa	aa	aa	aa	aa	aa	aa	aa	aa	aa	aa	aa	aa	aa	aa	ab	ab	bb	ab	ab	ab	bb	bb	ab	ab	ab	ab	aa	bb	bb	ab	bb	ab	ab
A03	48.12	Block2688	aaxbb	aa	ab	aa	aa	aa	aa	aa	aa	aa	aa	aa	aa	aa	aa	aa	aa	aa	aa	aa	aa	aa	aa	aa	aa	aa	aa	aa	ab	ab	bb	ab	ab	ab	bb	bb	ab	ab	ab	ab	aa	bb	bb	ab	bb	ab	ab
A03	49.12	Block2696	aaxbb	aa	aa	aa	aa	aa	aa	aa	aa	aa	aa	aa	aa	aa	aa	aa	aa	aa	aa	aa	aa	aa	aa	aa	aa	aa	aa	aa	ab	ab	bb	ab	ab	ab	bb	bb	ab	ab	ab	ab	aa	bb	bb	ab	bb	ab	ab
A03	49.37	Block2699	aaxbb	aa	aa	aa	aa	aa	aa	aa	aa	aa	aa	aa	aa	aa	aa	aa	aa	aa	aa	aa	aa	aa	aa	aa	aa	aa	aa	aa	ab	ab	bb	ab	ab	ab	bb	bb	ab	bb	ab	ab	aa	bb	bb	ab	bb	ab	ab
A03	49.62	Block2700	aaxbb	aa	aa	aa	aa	aa	aa	aa	aa	aa	aa	aa	aa	aa	aa	aa	aa	aa	aa	aa	aa	aa	aa	aa	aa	aa	aa	aa	ab	ab	bb	ab	ab	ab	bb	bb	ab	bb	ab	ab	aa	bb	bb	ab	bb	ab	ab
A03	49.87	Block2701	aaxbb	aa	aa	aa	aa	aa	aa	aa	aa	aa	aa	aa	aa	aa	aa	aa	aa	aa	aa	aa	aa	aa	aa	aa	aa	aa	aa	aa	ab	ab	bb	ab	ab	ab	bb	bb	ab	bb	ab	ab	aa	bb	bb	ab	bb	ab	ab
A03	49.87	Block2704	aaxbb	aa	aa	aa	aa	aa	aa	aa	aa	aa	aa	aa	aa	aa	aa	aa	aa	aa	aa	aa	aa	aa	aa	aa	aa	aa	aa	aa	ab	ab	bb	ab	ab	ab	bb	bb	ab	bb	ab	ab	aa	bb	bb	ab	bb	ab	ab
A03	50.12	Block2708	aaxbb	aa	aa	aa	aa	aa	aa	aa	aa	aa	aa	aa	aa	aa	aa	aa	aa	aa	aa	aa	aa	aa	aa	aa	aa	aa	aa	aa	ab	ab	bb	ab	ab	ab	bb	bb	ab	bb	ab	ab	aa	bb	bb	ab	bb	ab	ab
A03	50.62	Block2710	aaxbb	aa	ab	aa	aa	aa	aa	aa	aa	aa	aa	aa	aa	aa	aa	aa	aa	aa	aa	aa	aa	aa	aa	aa	aa	aa	aa	aa	ab	ab	bb	ab	ab	ab	bb	bb	ab	bb	ab	ab	aa	bb	bb	ab	bb	ab	ab
A03	50.87	Block2715	aaxbb	aa	ab	aa	aa	aa	aa	aa	aa	aa	aa	aa	aa	aa	aa	aa	aa	aa	aa	aa	aa	aa	aa	aa	aa	aa	aa	aa	ab	ab	bb	ab	ab	ab	bb	bb	ab	bb	ab	ab	aa	bb	bb	ab	bb	ab	ab
A03	50.87	Block2719	aaxbb	aa	ab	aa	aa	aa	aa	aa	aa	aa	aa	aa	aa	aa	aa	aa	aa	aa	aa	aa	aa	aa	aa	aa	aa	aa	aa	aa	ab	ab	bb	ab	ab	ab	bb	bb	ab	bb	ab	ab	aa	bb	bb	ab	bb	ab	ab
A03	50.87	Block2725	aaxbb	aa	ab	aa	aa	aa	aa	aa	aa	aa	aa	aa	aa	aa	aa	aa	aa	aa	aa	aa	aa	aa	aa	aa	aa	aa	aa	aa	ab	ab	bb	ab	ab	ab	bb	bb	ab	bb	ab	ab	aa	bb	bb	ab	bb	ab	ab
A03	51.12	Block2714	aaxbb	aa	aa	aa	aa	aa	aa	aa	aa	aa	aa	aa	aa	aa	aa	aa	aa	aa	aa	aa	aa	aa	aa	aa	aa	aa	aa	aa	ab	ab	bb	ab	ab	ab	bb	bb	ab	bb	ab	ab	aa	bb	bb	ab	bb	ab	ab
A03	51.37	Block2727	aaxbb	aa	aa	aa	aa	aa	aa	aa	aa	aa	aa	aa	aa	aa	aa	aa	aa	aa	aa	aa	aa	aa	aa	aa	aa	aa	aa	aa	ab	ab	bb	ab	ab	ab	bb	bb	ab	bb	ab	ab	aa	bb	bb	ab	bb	ab	ab
A03	51.62	Block2728	aaxbb	aa	aa	aa	aa	aa	aa	aa	aa	aa	aa	aa	aa	aa	aa	aa	aa	aa	aa	aa	aa	aa	aa	aa	aa	aa	aa	aa	ab	ab	bb	ab	ab	ab	bb	bb	ab	bb	ab	ab	aa	bb	bb	ab	bb	ab	ab
A03	51.87	Block2713	aaxbb	aa	aa	aa	aa	aa	aa	aa	aa	aa	aa	aa	aa	aa	aa	aa	aa	aa	aa	aa	aa	aa	aa	aa	aa	aa	aa	aa	ab	ab	bb	ab	ab	ab	bb	bb	ab	bb	ab	ab	aa	bb	bb	ab	bb	ab	ab
A03	51.87	Block2717	aaxbb	aa	aa	aa	aa	aa	aa	aa	aa	aa	aa	aa	aa	aa	aa	aa	aa	aa	aa	aa	aa	aa	aa	aa	aa	aa	aa	aa	ab	ab	bb	ab	ab	ab	bb	bb	ab	bb	ab	ab	aa	bb	bb	ab	bb	ab	ab
A03	51.87	Block2721	aaxbb	aa	aa	aa	aa	aa	aa	aa	aa	aa	aa	aa	aa	aa	aa	aa	aa	aa	aa	aa	aa	aa	aa	aa	aa	aa	aa	aa	ab	ab	bb	ab	ab	ab	bb	bb	ab	bb	ab	ab	aa	bb	bb	ab	bb	ab	ab
A03	51.87	Block2723	aaxbb	aa	aa	aa	aa	aa	aa	aa	aa	aa	aa	aa	aa	aa	aa	aa	aa	aa	aa	aa	aa	aa	aa	aa	aa	aa	aa	aa	ab	ab	bb	ab	ab	ab	bb	bb	ab	bb	ab	ab	aa	bb	bb	ab	bb	ab	ab
A03	52.12	Block2722	aaxbb	aa	ab	aa	aa	aa	aa	aa	aa	aa	aa	aa	aa	aa	aa	aa	aa	aa	aa	aa	aa	aa	aa	aa	aa	aa	aa	aa	ab	ab	bb	ab	ab	ab	bb	bb	ab	bb	ab	ab	aa	bb	bb	ab	bb	ab	ab
A03	52.62	Block2726	aaxbb	aa	ab	aa	aa	aa	aa	aa	aa	aa	aa	aa	aa	aa	aa	aa	aa	aa	aa	aa	aa	aa	aa	aa	aa	aa	aa	aa	ab	ab	bb	ab	ab	ab	bb	bb	ab	bb	ab	ab	aa	bb	bb	ab	bb	ab	ab
A03	53.12	Block2732	aaxbb	aa	ab	aa	aa	aa	aa	aa	aa	aa	aa	aa	aa	aa	aa	aa	aa	aa	aa	aa	aa	aa	aa	aa	aa	aa	aa	aa	ab	ab	bb	ab	ab	ab	bb	bb	aa	bb	ab	ab	aa	bb	bb	ab	bb	ab	ab
A03	53.37	Block2735	aaxbb	aa	ab	aa	aa	aa	aa	aa	aa	aa	aa	aa	aa	aa	aa	aa	aa	aa	aa	aa	aa	aa	aa	aa	aa	aa	aa	aa	ab	ab	bb	ab	ab	ab	bb	bb	aa	bb	ab	ab	aa	bb	bb	ab	bb	ab	ab
A03	53.87	Block2731	aaxbb	aa	aa	aa	aa	aa	aa	aa	aa	aa	aa	aa	aa	aa	aa	aa	aa	aa	aa	aa	aa	aa	aa	aa	aa	aa	aa	aa	ab	ab	bb	ab	ab	ab	bb	bb	aa	bb	ab	ab	aa	bb	bb	ab	bb	ab	ab
A03	53.87	Block2733	aaxbb	aa	aa	aa	aa	aa	aa	aa	aa	aa	aa	aa	aa	aa	aa	aa	aa	aa	aa	aa	aa	aa	aa	aa	aa	aa	aa	aa	ab	ab	bb	ab	ab	ab	bb	bb	aa	bb	ab	ab	aa	bb	bb	ab	bb	ab	ab
A03	54.62	Block2738	aaxbb	aa	aa	aa	aa	aa	aa	aa	aa	aa	aa	aa	aa	aa	aa	aa	aa	aa	aa	aa	aa	aa	aa	aa	aa	aa	aa	aa	ab	ab	bb	ab	ab	ab	bb	bb	aa	bb	ab	ab	aa	bb	bb	ab	bb	ab	ab
A03	55.871	Block2753	aaxbb	aa	aa	aa	aa	aa	aa	aa	aa	aa	aa	aa	aa	aa	aa	aa	aa	aa	aa	aa	aa	aa	aa	aa	aa	aa	aa	aa	ab	ab	bb	ab	ab	ab	bb	bb	aa	bb	ab	ab	aa	ab	bb	ab	bb	ab	ab
A03	56.121	Block2762	aaxbb	aa	aa	aa	aa	aa	aa	aa	aa	aa	aa	aa	aa	aa	aa	aa	aa	aa	aa	aa	aa	aa	aa	aa	aa	aa	aa	aa	ab	ab	bb	ab	ab	ab	bb	bb	aa	bb	ab	ab	aa	ab	bb	ab	bb	ab	ab
A03	56.371	Block2761	aaxbb	aa	aa	aa	aa	aa	aa	aa	aa	aa	aa	aa	aa	aa	aa	aa	aa	aa	aa	aa	aa	aa	aa	aa	aa	aa	aa	aa	ab	ab	bb	ab	ab	ab	bb	bb	aa	bb	ab	ab	aa	ab	bb	ab	bb	ab	ab
A03	56.621	Block2756	aaxbb	aa	ab	aa	aa	aa	aa	aa	aa	aa	aa	aa	aa	aa	aa	aa	aa	aa	aa	aa	aa	aa	aa	aa	aa	aa	aa	aa	ab	ab	bb	ab	ab	ab	bb	bb	aa	bb	ab	ab	aa	ab	bb	ab	bb	ab	ab
A03	56.871	Block2755	aaxbb	aa	ab	aa	aa	aa	aa	aa	aa	aa	aa	aa	aa	aa	aa	aa	aa	aa	aa	aa	aa	aa	aa	aa	aa	aa	aa	aa	ab	ab	bb	ab	ab	ab	bb	bb	aa	bb	ab	ab	aa	ab	bb	ab	bb	ab	ab
A03	57.121	Block2766	aaxbb	aa	ab	aa	aa	aa	aa	aa	aa	aa	aa	aa	aa	aa	aa	aa	aa	aa	aa	aa	aa	aa	aa	aa	aa	aa	aa	aa	ab	ab	bb	ab	ab	ab	bb	bb	aa	bb	ab	aa	aa	ab	bb	ab	bb	ab	ab
A03	58.621	Block2790	aaxbb	aa	ab	aa	aa	aa	aa	aa	aa	aa	aa	aa	aa	aa	aa	aa	aa	aa	aa	aa	aa	aa	aa	aa	aa	aa	aa	aa	ab	ab	bb	ab	ab	ab	bb	bb	aa	bb	ab	aa	aa	ab	bb	ab	bb	ab	ab
A03	59.371	Block2793	aaxbb	aa	ab	aa	aa	aa	aa	aa	aa	aa	aa	aa	aa	aa	aa	aa	aa	aa	aa	aa	aa	aa	aa	aa	aa	aa	aa	aa	ab	ab	bb	ab	ab	ab	bb	bb	aa	bb	ab	aa	aa	ab	bb	ab	bb	ab	ab
A03	59.621	Block2798	aaxbb	aa	ab	aa	aa	aa	aa	aa	aa	aa	aa	aa	aa	aa	aa	aa	aa	aa	aa	aa	aa	aa	aa	aa	aa	aa	aa	aa	ab	ab	bb	ab	ab	ab	bb	bb	aa	bb	ab	aa	aa	ab	bb	ab	bb	ab	ab
A03	60.121	Block2802	aaxbb	aa	ab	aa	aa	aa	aa	aa	aa	aa	aa	aa	aa	aa	aa	aa	aa	aa	aa	aa	aa	aa	aa	aa	aa	aa	aa	aa	ab	ab	bb	ab	ab	ab	bb	bb	aa	bb	ab	aa	aa	ab	bb	ab	bb	ab	ab
A03	60.371	Block2801	aaxbb	aa	aa	aa	aa	aa	aa	aa	aa	aa	aa	aa	aa	aa	aa	aa	aa	aa	aa	aa	aa	aa	aa	aa	aa	aa	aa	aa	ab	ab	bb	ab	ab	ab	bb	bb	aa	bb	ab	aa	aa	ab	bb	ab	bb	ab	ab
A03	60.871	Block2803	aaxbb	aa	ab	aa	aa	aa	aa	aa	aa	aa	aa	aa	aa	aa	aa	aa	aa	aa	aa	aa	aa	aa	aa	aa	aa	aa	aa	aa	ab	ab	bb	ab	ab	ab	bb	bb	aa	bb	ab	aa	aa	ab	bb	ab	bb	ab	ab
A03	61.621	Block2806	aaxbb	aa	aa	aa	aa	aa	aa	aa	aa	aa	aa	aa	aa	aa	aa	aa	aa	aa	aa	aa	aa	aa	aa	aa	aa	aa	aa	aa	ab	ab	bb	ab	ab	ab	bb	bb	aa	bb	ab	aa	aa	ab	bb	ab	bb	ab	ab
A03	61.871	Block2805	aaxbb	aa	ab	aa	aa	aa	aa	aa	aa	aa	aa	aa	aa	aa	aa	aa	aa	aa	aa	aa	aa	aa	aa	aa	aa	aa	aa	aa	ab	ab	bb	ab	ab	ab	bb	bb	aa	bb	ab	aa	aa	ab	bb	ab	bb	ab	ab
A03	61.871	Block2807	aaxbb	aa	ab	aa	aa	aa	aa	aa	aa	aa	aa	aa	aa	aa	aa	aa	aa	aa	aa	aa	aa	aa	aa	aa	aa	aa	aa	aa	ab	ab	bb	ab	ab	ab	bb	bb	aa	bb	ab	aa	aa	ab	bb	ab	bb	ab	ab
A03	62.621	Block2810	aaxbb	aa	ab	aa	aa	aa	aa	aa	aa	aa	aa	aa	aa	aa	aa	aa	aa	aa	aa	aa	aa	aa	aa	aa	aa	aa	aa	aa	ab	ab	bb	ab	ab	ab	bb	bb	aa	bb	ab	aa	aa	ab	bb	ab	bb	ab	ab
A03	62.871	Block2811	aaxbb	aa	aa	aa	aa	aa	aa	aa	aa	aa	aa	aa	aa	aa	aa	aa	aa	aa	aa	aa	aa	aa	aa	aa	aa	aa	aa	aa	ab	ab	bb	ab	ab	ab	bb	bb	aa	bb	ab	aa	aa	ab	bb	ab	bb	ab	ab
A03	63.371	Block2813	aaxbb	aa	ab	aa	aa	aa	aa	aa	aa	aa	aa	aa	aa	aa	aa	aa	aa	aa	aa	aa	aa	aa	aa	aa	aa	aa	aa	aa	ab	ab	bb	ab	ab	ab	bb	bb	aa	bb	ab	aa	aa	ab	bb	ab	bb	ab	ab
A03	65.122	Block2817	aaxbb	aa	ab	aa	aa	aa	aa	aa	aa	aa	aa	aa	aa	aa	aa	aa	aa	aa	aa	aa	aa	aa	aa	aa	aa	aa	aa	aa	ab	ab	bb	ab	ab	ab	bb	bb	aa	ab	ab	aa	aa	ab	bb	ab	ab	ab	ab
A03	65.872	Block2819	aaxbb	aa	ab	aa	aa	aa	aa	aa	aa	aa	aa	aa	aa	aa	aa	aa	aa	aa	aa	aa	aa	aa	aa	aa	aa	aa	aa	aa	ab	aa	bb	ab	ab	ab	bb	bb	aa	ab	ab	aa	aa	ab	bb	ab	ab	ab	ab
A03	67.372	Block2823	aaxbb	aa	ab	aa	aa	aa	aa	aa	aa	aa	aa	aa	aa	aa	aa	aa	aa	aa	aa	aa	aa	aa	aa	aa	aa	aa	aa	aa	ab	aa	bb	ab	ab	ab	bb	bb	aa	ab	ab	aa	aa	ab	bb	ab	ab	ab	ab
A03	67.873	Block2825	aaxbb	aa	ab	aa	aa	aa	aa	aa	aa	aa	aa	aa	aa	aa	aa	aa	aa	aa	aa	aa	aa	aa	aa	aa	aa	aa	aa	aa	ab	aa	bb	ab	ab	ab	bb	bb	aa	ab	ab	aa	aa	ab	bb	ab	ab	ab	ab
A03	68.123	Block2826	aaxbb	aa	ab	aa	aa	aa	aa	aa	aa	aa	aa	aa	aa	aa	aa	aa	aa	aa	aa	aa	aa	aa	aa	aa	aa	aa	aa	aa	ab	aa	bb	ab	ab	ab	bb	bb	aa	ab	ab	aa	aa	ab	bb	ab	ab	ab	ab
A03	68.373	Block2827	aaxbb	aa	ab	aa	aa	aa	aa	aa	aa	aa	aa	aa	aa	aa	aa	aa	aa	aa	aa	aa	aa	aa	aa	aa	aa	aa	aa	aa	ab	aa	bb	ab	ab	ab	bb	bb	aa	ab	ab	aa	aa	ab	bb	ab	ab	ab	ab
A03	68.373	Block2829	aaxbb	aa	ab	aa	aa	aa	aa	aa	aa	aa	aa	aa	aa	aa	aa	aa	aa	aa	aa	aa	aa	aa	aa	aa	aa	aa	aa	aa	ab	aa	bb	ab	ab	ab	bb	bb	aa	ab	ab	aa	aa	ab	bb	ab	ab	ab	ab
A03	68.373	Block2830	aaxbb	aa	ab	aa	aa	aa	aa	aa	aa	aa	aa	aa	aa	aa	aa	aa	aa	aa	aa	aa	aa	aa	aa	aa	aa	aa	aa	aa	ab	aa	bb	ab	ab	ab	bb	bb	aa	ab	ab	aa	aa	ab	bb	ab	ab	ab	ab
A03	68.623	Block2828	aaxbb	aa	ab	aa	aa	aa	aa	aa	aa	aa	aa	aa	aa	aa	aa	aa	aa	aa	aa	aa	aa	aa	aa	aa	aa	aa	aa	aa	ab	aa	bb	ab	ab	ab	bb	bb	aa	ab	ab	aa	aa	ab	bb	ab	ab	ab	ab
A03	68.623	Block2831	aaxbb	aa	ab	aa	aa	aa	aa	aa	aa	aa	aa	aa	aa	aa	aa	aa	aa	aa	aa	aa	aa	aa	aa	aa	aa	aa	aa	aa	ab	aa	bb	ab	ab	ab	bb	bb	aa	ab	ab	aa	aa	ab	bb	ab	ab	ab	ab
A03	68.873	Block2832	aaxbb	aa	ab	aa	aa	aa	aa	aa	aa	aa	aa	aa	aa	aa	aa	aa	aa	aa	aa	aa	aa	aa	aa	aa	aa	aa	aa	aa	ab	aa	bb	ab	ab	ab	bb	bb	aa	ab	ab	aa	aa	ab	bb	ab	ab	ab	ab
A03	73.079	Block2839	aaxbb	ab	ab	aa	ab	bb	ab	ab	bb	aa	aa	ab	aa	ab	aa	ab	ab	bb	bb	ab	ab	ab	ab	bb	bb	aa	ab	ab	ab	aa	bb	ab	ab	ab	bb	bb	aa	ab	ab	aa	aa	ab	bb	ab	ab	ab	ab
A03	73.329	Block2841	aaxbb	ab	ab	aa	ab	bb	ab	ab	bb	aa	aa	ab	aa	ab	aa	ab	ab	bb	bb	ab	ab	ab	ab	bb	bb	aa	ab	ab	ab	aa	bb	ab	ab	ab	bb	bb	aa	ab	ab	aa	aa	ab	bb	ab	ab	ab	ab
A03	73.829	Block2843	aaxbb	ab	ab	aa	ab	bb	ab	ab	bb	aa	aa	ab	aa	ab	aa	ab	ab	bb	bb	ab	ab	ab	ab	bb	bb	aa	ab	ab	ab	aa	bb	ab	ab	ab	bb	bb	aa	ab	ab	aa	aa	ab	bb	ab	ab	ab	ab
A03	74.079	Block2844	aaxbb	ab	ab	aa	ab	bb	ab	ab	bb	aa	aa	ab	aa	ab	aa	ab	ab	bb	bb	ab	ab	ab	ab	bb	bb	aa	ab	aa	ab	aa	bb	ab	ab	ab	bb	bb	aa	ab	ab	aa	aa	ab	bb	ab	ab	ab	ab
A03	74.079	Block2846	aaxbb	ab	ab	aa	ab	bb	ab	ab	bb	aa	aa	ab	aa	ab	aa	ab	ab	bb	bb	ab	ab	ab	ab	bb	bb	aa	ab	aa	ab	aa	bb	ab	ab	ab	bb	bb	aa	ab	ab	aa	aa	ab	bb	ab	ab	ab	ab
A03	74.079	Block2848	aaxbb	ab	ab	aa	ab	bb	ab	ab	bb	aa	aa	ab	aa	ab	aa	ab	ab	bb	bb	ab	ab	ab	ab	bb	bb	aa	ab	aa	ab	aa	bb	ab	ab	ab	bb	bb	aa	ab	ab	aa	aa	ab	bb	ab	ab	ab	ab
A03	74.329	Block2845	aaxbb	ab	ab	aa	ab	bb	ab	ab	bb	aa	aa	ab	aa	ab	aa	ab	ab	bb	bb	ab	ab	ab	ab	bb	bb	aa	ab	aa	ab	aa	bb	ab	ab	ab	bb	bb	aa	ab	ab	aa	aa	ab	bb	ab	ab	ab	ab
A03	75.079	Block2851	aaxbb	ab	ab	aa	ab	bb	ab	ab	bb	aa	aa	ab	aa	ab	aa	ab	ab	bb	bb	ab	ab	ab	ab	bb	bb	aa	ab	aa	ab	aa	bb	ab	ab	ab	bb	bb	aa	ab	ab	aa	aa	ab	bb	ab	ab	ab	ab
A03	75.329	Block2854	aaxbb	ab	ab	aa	ab	bb	ab	ab	bb	aa	aa	ab	aa	ab	aa	ab	ab	bb	bb	ab	ab	ab	ab	bb	bb	aa	ab	aa	ab	aa	bb	ab	ab	ab	bb	bb	aa	ab	ab	aa	aa	ab	bb	ab	ab	ab	ab
A03	75.579	Block2855	aaxbb	ab	ab	aa	ab	bb	ab	ab	bb	aa	aa	ab	aa	ab	aa	ab	ab	bb	bb	ab	ab	ab	ab	bb	bb	aa	ab	aa	ab	aa	bb	ab	ab	ab	bb	bb	aa	ab	ab	aa	aa	ab	bb	ab	ab	ab	ab
A03	75.829	Block2856	aaxbb	ab	ab	aa	ab	bb	ab	ab	bb	aa	aa	ab	aa	ab	aa	ab	ab	bb	bb	ab	ab	ab	ab	bb	bb	aa	ab	aa	ab	aa	bb	ab	ab	ab	bb	bb	aa	ab	ab	aa	aa	ab	bb	ab	ab	ab	ab
A03	76.079	Block2861	aaxbb	ab	ab	aa	ab	bb	ab	aa	bb	aa	aa	ab	aa	ab	aa	ab	ab	bb	bb	ab	ab	ab	ab	bb	bb	aa	ab	aa	ab	aa	bb	ab	ab	ab	bb	bb	aa	ab	ab	aa	aa	ab	bb	ab	ab	ab	ab
A03	76.079	Block2863	aaxbb	ab	ab	aa	ab	bb	ab	aa	bb	aa	aa	ab	aa	ab	aa	ab	ab	bb	bb	ab	ab	ab	ab	bb	bb	aa	ab	aa	ab	aa	bb	ab	ab	ab	bb	bb	aa	ab	ab	aa	aa	ab	bb	ab	ab	ab	ab
A03	76.079	Block2865	aaxbb	ab	ab	aa	ab	bb	ab	aa	bb	aa	aa	ab	aa	ab	aa	ab	ab	bb	bb	ab	ab	ab	ab	bb	bb	aa	ab	aa	ab	aa	bb	ab	ab	ab	bb	bb	aa	ab	ab	aa	aa	ab	bb	ab	ab	ab	ab
A03	76.079	Block2867	aaxbb	ab	ab	aa	ab	bb	ab	aa	bb	aa	aa	ab	aa	ab	aa	ab	ab	bb	bb	ab	ab	ab	ab	bb	bb	aa	ab	aa	ab	aa	bb	ab	ab	ab	bb	bb	aa	ab	ab	aa	aa	ab	bb	ab	ab	ab	ab
A03	76.329	Block2859	aaxbb	ab	ab	aa	ab	bb	ab	aa	bb	aa	aa	ab	aa	ab	aa	ab	ab	bb	bb	ab	ab	ab	ab	bb	bb	aa	ab	aa	ab	aa	bb	ab	ab	ab	bb	bb	aa	ab	ab	aa	aa	ab	bb	ab	ab	ab	ab
A03	76.329	Block2860	aaxbb	ab	ab	aa	ab	bb	ab	aa	bb	aa	aa	ab	aa	ab	aa	ab	ab	bb	bb	ab	ab	ab	ab	bb	bb	aa	ab	aa	ab	aa	bb	ab	ab	ab	bb	bb	aa	ab	ab	aa	aa	ab	bb	ab	ab	ab	ab
A03	76.329	Block2866	aaxbb	ab	ab	aa	ab	bb	ab	aa	bb	aa	aa	ab	aa	ab	aa	ab	ab	bb	bb	ab	ab	ab	ab	bb	bb	aa	ab	aa	ab	aa	bb	ab	ab	ab	bb	bb	aa	ab	ab	aa	aa	ab	bb	ab	ab	ab	ab
A03	76.829	Block2868	aaxbb	ab	ab	aa	ab	bb	ab	aa	bb	aa	aa	ab	ab	ab	aa	ab	ab	bb	bb	ab	ab	ab	ab	bb	bb	aa	ab	aa	ab	aa	bb	ab	ab	ab	bb	bb	aa	ab	ab	aa	aa	ab	bb	ab	ab	ab	ab
A03	77.579	Block2870	aaxbb	ab	ab	aa	ab	bb	ab	aa	bb	aa	aa	ab	ab	ab	aa	ab	bb	bb	bb	ab	ab	ab	ab	bb	bb	aa	ab	aa	ab	aa	bb	ab	ab	ab	bb	bb	aa	ab	ab	aa	aa	ab	bb	ab	ab	ab	ab
A03	77.829	Block2871	aaxbb	ab	ab	aa	ab	bb	ab	aa	bb	aa	aa	ab	ab	ab	aa	ab	bb	bb	bb	ab	ab	ab	ab	bb	bb	aa	ab	aa	ab	aa	bb	ab	ab	ab	bb	bb	aa	ab	ab	aa	aa	ab	bb	ab	ab	ab	ab
A03	77.829	Block2872	aaxbb	ab	ab	aa	ab	bb	ab	aa	bb	aa	aa	ab	ab	ab	aa	ab	bb	bb	bb	ab	ab	ab	ab	bb	bb	aa	ab	aa	ab	aa	bb	ab	ab	ab	bb	bb	aa	ab	ab	aa	aa	ab	bb	ab	ab	ab	ab
A03	78.079	Block2874	aaxbb	ab	ab	aa	ab	bb	ab	aa	bb	aa	aa	ab	ab	ab	aa	ab	bb	bb	bb	ab	ab	ab	ab	bb	bb	aa	ab	aa	ab	aa	bb	ab	ab	ab	bb	ab	aa	ab	ab	aa	aa	ab	bb	ab	ab	ab	ab
A03	78.079	Block2876	aaxbb	ab	ab	aa	ab	bb	ab	aa	bb	aa	aa	ab	ab	ab	aa	ab	bb	bb	bb	ab	ab	ab	ab	bb	bb	aa	ab	aa	ab	aa	bb	ab	ab	ab	bb	ab	aa	ab	ab	aa	aa	ab	bb	ab	ab	ab	ab
A03	78.329	Block2875	aaxbb	ab	ab	aa	ab	bb	ab	aa	bb	aa	aa	ab	ab	ab	aa	ab	bb	bb	bb	ab	ab	ab	ab	bb	bb	aa	ab	aa	ab	aa	bb	ab	ab	ab	bb	ab	aa	ab	ab	aa	aa	ab	bb	ab	ab	ab	ab
A03	78.329	Block2877	aaxbb	ab	ab	aa	ab	bb	ab	aa	bb	aa	aa	ab	ab	ab	aa	ab	bb	bb	bb	ab	ab	ab	ab	bb	bb	aa	ab	aa	ab	aa	bb	ab	ab	ab	bb	ab	aa	ab	ab	aa	aa	ab	bb	ab	ab	ab	ab
A03	78.579	Block2878	aaxbb	ab	ab	aa	ab	bb	ab	aa	bb	aa	aa	ab	ab	ab	aa	ab	bb	bb	bb	ab	ab	ab	ab	bb	bb	aa	ab	aa	ab	aa	bb	ab	ab	ab	bb	ab	aa	ab	ab	aa	aa	ab	bb	ab	ab	ab	ab
A03	79.579	Block2882	aaxbb	ab	bb	aa	ab	bb	ab	aa	bb	aa	aa	ab	ab	ab	aa	ab	bb	bb	bb	ab	ab	ab	ab	bb	bb	aa	ab	aa	ab	aa	bb	ab	ab	ab	bb	ab	aa	ab	ab	aa	aa	ab	bb	ab	ab	ab	ab
A03	79.829	Block2883	aaxbb	ab	bb	aa	ab	bb	ab	aa	bb	aa	aa	ab	ab	ab	aa	ab	bb	bb	bb	ab	ab	ab	ab	bb	bb	aa	ab	aa	ab	aa	bb	ab	ab	ab	bb	ab	aa	ab	ab	aa	aa	ab	bb	ab	ab	ab	ab
A03	80.329	Block2885	aaxbb	ab	bb	aa	ab	bb	ab	aa	bb	aa	aa	ab	ab	ab	aa	ab	bb	bb	ab	ab	ab	ab	ab	bb	bb	aa	ab	aa	ab	aa	bb	ab	ab	ab	bb	ab	aa	ab	ab	aa	aa	ab	bb	ab	ab	ab	ab
A03	81.079	Block2890	aaxbb	ab	bb	aa	ab	bb	ab	aa	bb	aa	aa	ab	ab	ab	aa	ab	bb	bb	ab	ab	ab	ab	ab	bb	bb	aa	ab	aa	ab	aa	bb	ab	bb	ab	bb	ab	aa	ab	ab	aa	aa	ab	bb	ab	ab	ab	ab
A03	81.079	Block2900	aaxbb	ab	bb	aa	ab	bb	ab	aa	bb	aa	aa	ab	ab	ab	aa	ab	bb	bb	ab	ab	ab	ab	ab	bb	bb	aa	ab	aa	ab	aa	bb	ab	bb	ab	bb	ab	aa	ab	ab	aa	aa	ab	bb	ab	ab	ab	ab
A03	81.579	Block2898	aaxbb	ab	ab	aa	ab	bb	ab	aa	bb	aa	aa	ab	ab	ab	aa	ab	bb	bb	ab	ab	ab	ab	ab	bb	bb	aa	ab	aa	ab	aa	bb	ab	ab	ab	bb	ab	aa	ab	ab	aa	aa	ab	bb	ab	ab	ab	ab
A03	82.079	Block2902	aaxbb	ab	ab	aa	ab	bb	ab	aa	bb	aa	aa	ab	ab	ab	aa	ab	bb	bb	ab	ab	ab	ab	ab	bb	bb	aa	ab	aa	ab	aa	bb	ab	bb	ab	bb	ab	aa	ab	ab	aa	aa	ab	bb	ab	ab	ab	ab
A03	82.579	Block2904	aaxbb	ab	bb	aa	ab	bb	ab	aa	bb	aa	aa	ab	ab	ab	aa	ab	bb	bb	ab	ab	ab	ab	ab	bb	bb	aa	ab	aa	ab	aa	bb	ab	bb	ab	bb	ab	aa	ab	ab	aa	aa	ab	bb	ab	ab	ab	ab
A03	83.329	Block2909	aaxbb	ab	ab	aa	ab	bb	ab	aa	bb	aa	aa	ab	ab	ab	aa	ab	bb	bb	ab	ab	ab	ab	ab	bb	bb	aa	ab	aa	ab	aa	bb	ab	bb	ab	bb	ab	ab	ab	ab	aa	aa	ab	bb	ab	ab	ab	ab
A03	83.579	Block2908	aaxbb	ab	ab	aa	ab	bb	ab	aa	bb	aa	aa	ab	ab	ab	aa	ab	bb	bb	ab	ab	ab	ab	ab	bb	bb	aa	ab	aa	ab	aa	bb	ab	ab	ab	bb	ab	ab	ab	ab	aa	aa	ab	bb	ab	ab	ab	ab
A03	84.329	Block2917	aaxbb	ab	ab	aa	ab	bb	ab	aa	bb	aa	aa	ab	ab	ab	aa	ab	bb	bb	ab	ab	ab	ab	ab	bb	bb	aa	ab	aa	ab	aa	bb	ab	bb	ab	bb	ab	ab	ab	ab	aa	aa	ab	bb	ab	ab	ab	ab
A03	84.579	Block2916	aaxbb	ab	ab	aa	ab	bb	ab	aa	bb	aa	aa	ab	ab	ab	aa	ab	bb	bb	ab	ab	ab	ab	ab	bb	bb	aa	ab	aa	ab	aa	bb	ab	bb	ab	bb	ab	ab	ab	ab	aa	aa	ab	bb	ab	ab	ab	ab
A03	84.579	Block2920	aaxbb	ab	ab	aa	ab	bb	ab	aa	bb	aa	aa	ab	ab	ab	aa	ab	bb	bb	ab	ab	ab	ab	ab	bb	bb	aa	ab	aa	ab	aa	bb	ab	bb	ab	bb	ab	ab	ab	ab	aa	aa	ab	bb	ab	ab	ab	ab
A03	84.579	Block2924	aaxbb	ab	ab	aa	ab	bb	ab	aa	bb	aa	aa	ab	ab	ab	aa	ab	bb	bb	ab	ab	ab	ab	ab	bb	bb	aa	ab	aa	ab	aa	bb	ab	bb	ab	bb	ab	ab	ab	ab	aa	aa	ab	bb	ab	ab	ab	ab
A03	84.829	Block2921	aaxbb	ab	ab	aa	ab	bb	ab	aa	bb	aa	aa	ab	ab	ab	aa	ab	bb	bb	ab	ab	ab	ab	ab	bb	bb	aa	ab	aa	ab	aa	bb	ab	ab	ab	bb	ab	ab	ab	ab	aa	aa	ab	bb	ab	ab	ab	ab
A03	85.329	Block2915	aaxbb	ab	bb	aa	ab	bb	ab	aa	bb	aa	aa	ab	ab	ab	aa	ab	bb	bb	ab	ab	ab	ab	ab	bb	bb	aa	ab	aa	ab	aa	bb	ab	bb	ab	bb	ab	ab	ab	ab	aa	aa	ab	bb	ab	ab	ab	ab
A03	85.329	Block2919	aaxbb	ab	bb	aa	ab	bb	ab	aa	bb	aa	aa	ab	ab	ab	aa	ab	bb	bb	ab	ab	ab	ab	ab	bb	bb	aa	ab	aa	ab	aa	bb	ab	bb	ab	bb	ab	ab	ab	ab	aa	aa	ab	bb	ab	ab	ab	ab
A03	85.829	Block2929	aaxbb	ab	bb	aa	ab	bb	ab	aa	bb	aa	aa	ab	ab	ab	aa	ab	bb	bb	ab	ab	ab	ab	ab	ab	bb	aa	ab	aa	ab	aa	bb	ab	bb	ab	bb	ab	ab	ab	ab	aa	aa	ab	bb	ab	ab	ab	ab
A03	86.079	Block2932	aaxbb	ab	bb	aa	ab	bb	ab	aa	bb	aa	aa	ab	ab	ab	aa	ab	bb	bb	ab	ab	ab	ab	ab	ab	bb	aa	ab	aa	ab	aa	bb	ab	bb	ab	bb	ab	ab	ab	ab	aa	aa	ab	bb	ab	ab	ab	ab
A03	86.579	Block2930	aaxbb	ab	ab	aa	ab	bb	ab	aa	bb	aa	aa	ab	ab	ab	aa	ab	bb	bb	ab	ab	ab	ab	ab	ab	bb	aa	ab	aa	ab	aa	bb	ab	bb	ab	bb	ab	ab	ab	ab	aa	aa	ab	bb	ab	ab	ab	ab
A03	86.829	Block2937	aaxbb	ab	ab	aa	ab	bb	ab	aa	bb	aa	aa	ab	ab	ab	aa	ab	bb	bb	ab	ab	ab	ab	ab	ab	bb	aa	ab	aa	ab	aa	bb	ab	bb	ab	bb	ab	ab	ab	ab	aa	aa	ab	bb	ab	ab	ab	ab
A03	87.079	Block2934	aaxbb	ab	bb	aa	ab	bb	ab	aa	bb	aa	aa	ab	ab	ab	aa	ab	bb	bb	ab	ab	ab	ab	ab	ab	bb	aa	ab	aa	ab	aa	bb	ab	bb	ab	bb	ab	ab	ab	ab	aa	aa	ab	bb	ab	ab	ab	ab
A03	87.079	Block2936	aaxbb	ab	bb	aa	ab	bb	ab	aa	bb	aa	aa	ab	ab	ab	aa	ab	bb	bb	ab	ab	ab	ab	ab	ab	bb	aa	ab	aa	ab	aa	bb	ab	bb	ab	bb	ab	ab	ab	ab	aa	aa	ab	bb	ab	ab	ab	ab
A03	87.079	Block2938	aaxbb	ab	bb	aa	ab	bb	ab	aa	bb	aa	aa	ab	ab	ab	aa	ab	bb	bb	ab	ab	ab	ab	ab	ab	bb	aa	ab	aa	ab	aa	bb	ab	bb	ab	bb	ab	ab	ab	ab	aa	aa	ab	bb	ab	ab	ab	ab
A03	87.579	Block2940	aaxbb	ab	bb	aa	ab	bb	ab	aa	bb	aa	aa	ab	ab	ab	aa	ab	bb	bb	ab	ab	ab	ab	ab	ab	bb	aa	ab	aa	ab	aa	bb	ab	bb	ab	bb	ab	ab	ab	ab	aa	aa	ab	bb	ab	ab	ab	ab
A03	87.829	Block2941	aaxbb	ab	bb	aa	ab	ab	ab	aa	bb	aa	aa	ab	ab	ab	aa	ab	bb	bb	ab	ab	ab	ab	ab	ab	bb	aa	ab	aa	ab	aa	bb	ab	bb	ab	bb	ab	ab	ab	ab	aa	aa	ab	bb	ab	ab	ab	ab
A03	87.829	Block2943	aaxbb	ab	bb	aa	ab	ab	ab	aa	bb	aa	aa	ab	ab	ab	aa	ab	bb	bb	ab	ab	ab	ab	ab	ab	bb	aa	ab	aa	ab	aa	bb	ab	bb	ab	bb	ab	ab	ab	ab	aa	aa	ab	bb	ab	ab	ab	ab
A03	87.829	Block2945	aaxbb	ab	bb	aa	ab	ab	ab	aa	bb	aa	aa	ab	ab	ab	aa	ab	bb	bb	ab	ab	ab	ab	ab	ab	bb	aa	ab	aa	ab	aa	bb	ab	bb	ab	bb	ab	ab	ab	ab	aa	aa	ab	bb	ab	ab	ab	ab
A03	87.829	Block2951	aaxbb	ab	bb	aa	ab	ab	ab	aa	bb	aa	aa	ab	ab	ab	aa	ab	bb	bb	ab	ab	ab	ab	ab	ab	bb	aa	ab	aa	ab	aa	bb	ab	bb	ab	bb	ab	ab	ab	ab	aa	aa	ab	bb	ab	ab	ab	ab
A03	88.079	Block2942	aaxbb	ab	ab	aa	ab	ab	ab	aa	bb	aa	aa	ab	ab	ab	aa	ab	bb	bb	ab	ab	ab	ab	ab	ab	bb	aa	ab	aa	ab	aa	bb	ab	bb	ab	bb	ab	ab	ab	ab	aa	aa	ab	bb	ab	ab	ab	ab
A03	88.079	Block2944	aaxbb	ab	ab	aa	ab	ab	ab	aa	bb	aa	aa	ab	ab	ab	aa	ab	bb	bb	ab	ab	ab	ab	ab	ab	bb	aa	ab	aa	ab	aa	bb	ab	bb	ab	bb	ab	ab	ab	ab	aa	aa	ab	bb	ab	ab	ab	ab
A03	88.329	Block2947	aaxbb	ab	ab	aa	ab	ab	ab	aa	bb	aa	aa	ab	ab	ab	aa	ab	bb	bb	ab	ab	ab	ab	ab	ab	bb	aa	ab	aa	ab	aa	bb	ab	bb	ab	bb	ab	ab	ab	ab	aa	aa	ab	bb	ab	ab	ab	ab
A03	88.329	Block2961	aaxbb	ab	ab	aa	ab	ab	ab	aa	bb	aa	aa	ab	ab	ab	aa	ab	bb	bb	ab	ab	ab	ab	ab	ab	bb	aa	ab	aa	ab	aa	bb	ab	bb	ab	bb	ab	ab	ab	ab	aa	aa	ab	bb	ab	ab	ab	ab
A03	89.33	Block2957	aaxbb	ab	ab	aa	ab	ab	ab	aa	bb	aa	aa	ab	ab	ab	aa	ab	bb	bb	ab	ab	ab	ab	ab	ab	bb	aa	ab	aa	ab	aa	bb	ab	ab	ab	bb	ab	ab	ab	ab	aa	aa	ab	bb	ab	ab	ab	ab
A03	89.33	Block2959	aaxbb	ab	ab	aa	ab	ab	ab	aa	bb	aa	aa	ab	ab	ab	aa	ab	bb	bb	ab	ab	ab	ab	ab	ab	bb	aa	ab	aa	ab	aa	bb	ab	ab	ab	bb	ab	ab	ab	ab	aa	aa	ab	bb	ab	ab	ab	ab
A03	90.08	Block2948	aaxbb	ab	ab	aa	ab	ab	ab	aa	bb	aa	aa	ab	ab	ab	aa	ab	bb	bb	ab	ab	ab	ab	ab	ab	bb	aa	ab	aa	ab	aa	bb	ab	ab	ab	bb	ab	ab	ab	ab	aa	aa	ab	bb	ab	ab	ab	ab
A03	90.08	Block2960	aaxbb	ab	ab	aa	ab	ab	ab	aa	bb	aa	aa	ab	ab	ab	aa	ab	bb	bb	ab	ab	ab	ab	ab	ab	bb	aa	ab	aa	ab	aa	bb	ab	ab	ab	bb	ab	ab	ab	ab	aa	aa	ab	bb	ab	ab	ab	ab
A03	90.58	Block2966	aaxbb	ab	ab	aa	ab	ab	ab	aa	bb	aa	aa	ab	ab	ab	aa	ab	bb	bb	ab	ab	ab	ab	ab	ab	bb	aa	ab	aa	ab	aa	bb	ab	ab	ab	bb	ab	ab	ab	ab	aa	aa	ab	bb	ab	ab	ab	ab
A03	91.33	Block2969	aaxbb	ab	bb	aa	ab	ab	ab	aa	bb	aa	aa	ab	ab	ab	aa	ab	bb	bb	ab	ab	ab	ab	ab	ab	bb	aa	ab	aa	ab	aa	bb	ab	bb	ab	bb	ab	ab	ab	ab	aa	aa	ab	bb	ab	ab	ab	ab
A03	91.33	Block2971	aaxbb	ab	bb	aa	ab	ab	ab	aa	bb	aa	aa	ab	ab	ab	aa	ab	bb	bb	ab	ab	ab	ab	ab	ab	bb	aa	ab	aa	ab	aa	bb	ab	bb	ab	bb	ab	ab	ab	ab	aa	aa	ab	bb	ab	ab	ab	ab
A03	91.58	Block2970	aaxbb	ab	ab	aa	ab	ab	ab	aa	bb	aa	aa	ab	ab	ab	aa	ab	bb	bb	ab	ab	ab	ab	ab	ab	bb	aa	ab	aa	ab	aa	bb	ab	bb	ab	bb	ab	ab	ab	ab	aa	aa	ab	bb	ab	ab	ab	ab
A03	91.58	Block2972	aaxbb	ab	ab	aa	ab	ab	ab	aa	bb	aa	aa	ab	ab	ab	aa	ab	bb	bb	ab	ab	ab	ab	ab	ab	bb	aa	ab	aa	ab	aa	bb	ab	bb	ab	bb	ab	ab	ab	ab	aa	aa	ab	bb	ab	ab	ab	ab
A03	92.08	Block2974	aaxbb	ab	ab	aa	ab	ab	ab	aa	bb	aa	aa	ab	ab	ab	aa	ab	bb	bb	ab	ab	ab	ab	ab	ab	bb	aa	ab	aa	ab	aa	bb	ab	bb	ab	bb	ab	ab	ab	ab	aa	aa	ab	bb	ab	ab	ab	ab
A03	92.33	Block2975	aaxbb	ab	ab	aa	ab	ab	ab	aa	bb	aa	aa	ab	ab	ab	aa	ab	bb	bb	ab	ab	ab	ab	ab	ab	bb	aa	ab	aa	ab	aa	bb	ab	bb	ab	bb	ab	ab	ab	ab	aa	aa	ab	bb	ab	ab	ab	ab
A03	92.33	Block2977	aaxbb	ab	ab	aa	ab	ab	ab	aa	bb	aa	aa	ab	ab	ab	aa	ab	bb	bb	ab	ab	ab	ab	ab	ab	bb	aa	ab	aa	ab	aa	bb	ab	bb	ab	bb	ab	ab	ab	ab	aa	aa	ab	bb	ab	ab	ab	ab
A03	92.58	Block2976	aaxbb	ab	bb	aa	ab	ab	ab	aa	bb	aa	aa	ab	ab	ab	aa	ab	bb	bb	ab	ab	ab	ab	ab	ab	bb	aa	ab	aa	ab	aa	bb	ab	bb	ab	bb	ab	ab	ab	ab	aa	aa	ab	bb	ab	ab	ab	ab
A03	93.08	Block2978	aaxbb	ab	ab	aa	ab	ab	ab	aa	bb	aa	aa	ab	ab	ab	aa	ab	bb	bb	ab	ab	ab	ab	ab	ab	bb	aa	ab	aa	ab	aa	bb	ab	bb	ab	bb	ab	ab	ab	ab	aa	aa	ab	bb	ab	ab	ab	ab
A03	93.58	Block2980	aaxbb	ab	ab	aa	ab	ab	ab	aa	bb	aa	aa	ab	ab	ab	aa	ab	bb	bb	ab	ab	ab	ab	ab	ab	bb	aa	ab	aa	ab	aa	bb	ab	ab	ab	bb	ab	ab	ab	ab	aa	aa	ab	bb	ab	ab	ab	ab
A03	94.08	Block2982	aaxbb	ab	bb	aa	ab	ab	ab	aa	bb	aa	aa	ab	ab	ab	aa	ab	bb	bb	ab	ab	ab	ab	ab	ab	bb	aa	ab	aa	ab	aa	bb	ab	ab	ab	bb	ab	ab	ab	ab	aa	aa	ab	bb	ab	ab	ab	ab
A03	94.33	Block2987	aaxbb	ab	bb	aa	ab	ab	ab	aa	bb	aa	aa	ab	ab	ab	aa	ab	bb	bb	ab	ab	ab	ab	ab	ab	bb	aa	ab	aa	ab	aa	bb	ab	bb	ab	bb	ab	ab	ab	ab	aa	aa	ab	bb	ab	ab	ab	ab
A03	94.58	Block2986	aaxbb	ab	bb	aa	ab	ab	ab	aa	bb	aa	aa	ab	ab	ab	aa	ab	bb	bb	ab	ab	ab	ab	ab	ab	bb	aa	ab	aa	ab	aa	bb	ab	bb	ab	bb	ab	ab	ab	ab	aa	aa	ab	bb	ab	ab	ab	ab
A03	94.58	Block2988	aaxbb	ab	bb	aa	ab	ab	ab	aa	bb	aa	aa	ab	ab	ab	aa	ab	bb	bb	ab	ab	ab	ab	ab	ab	bb	aa	ab	aa	ab	aa	bb	ab	bb	ab	bb	ab	ab	ab	ab	aa	aa	ab	bb	ab	ab	ab	ab
A03	94.58	Block2992	aaxbb	ab	bb	aa	ab	ab	ab	aa	bb	aa	aa	ab	ab	ab	aa	ab	bb	bb	ab	ab	ab	ab	ab	ab	bb	aa	ab	aa	ab	aa	bb	ab	bb	ab	bb	ab	ab	ab	ab	aa	aa	ab	bb	ab	ab	ab	ab
A03	94.58	Block2994	aaxbb	ab	bb	aa	ab	ab	ab	aa	bb	aa	aa	ab	ab	ab	aa	ab	bb	bb	ab	ab	ab	ab	ab	ab	bb	aa	ab	aa	ab	aa	bb	ab	bb	ab	bb	ab	ab	ab	ab	aa	aa	ab	bb	ab	ab	ab	ab
A03	94.83	Block2993	aaxbb	ab	bb	aa	ab	ab	ab	aa	bb	aa	aa	ab	ab	ab	aa	ab	bb	bb	ab	ab	ab	ab	ab	ab	bb	aa	ab	aa	ab	aa	bb	ab	ab	ab	bb	ab	ab	ab	ab	aa	aa	ab	bb	ab	ab	ab	ab
A03	95.33	Block2989	aaxbb	ab	ab	aa	ab	ab	ab	aa	bb	aa	aa	ab	ab	ab	aa	ab	bb	bb	ab	ab	ab	ab	ab	ab	bb	aa	ab	aa	ab	aa	bb	ab	bb	ab	bb	ab	ab	ab	ab	aa	aa	ab	bb	ab	ab	ab	ab
A03	95.83	Block2997	aaxbb	ab	bb	aa	ab	ab	ab	aa	bb	aa	aa	ab	ab	ab	aa	ab	bb	bb	ab	ab	ab	ab	ab	ab	bb	aa	ab	aa	ab	aa	bb	ab	bb	ab	bb	ab	ab	ab	ab	aa	aa	ab	bb	aa	ab	ab	ab
A03	96.08	Block2998	aaxbb	ab	ab	aa	ab	ab	ab	aa	bb	aa	aa	ab	ab	ab	aa	ab	bb	bb	ab	ab	ab	ab	ab	ab	bb	aa	ab	aa	ab	aa	bb	ab	bb	ab	bb	ab	ab	ab	ab	aa	aa	ab	bb	aa	ab	ab	ab
A03	96.58	Block3000	aaxbb	ab	ab	aa	ab	ab	ab	aa	bb	aa	aa	ab	ab	ab	aa	ab	bb	bb	ab	ab	ab	ab	ab	ab	bb	aa	ab	aa	ab	aa	bb	ab	bb	ab	bb	ab	ab	ab	ab	aa	aa	ab	bb	aa	ab	ab	ab
A03	96.83	Block3001	aaxbb	ab	ab	aa	ab	ab	ab	aa	bb	aa	aa	ab	ab	ab	aa	ab	bb	bb	ab	ab	ab	ab	ab	ab	bb	aa	ab	aa	ab	aa	bb	ab	ab	ab	bb	ab	ab	ab	ab	aa	aa	ab	bb	aa	ab	ab	ab
A03	97.33	Block3003	aaxbb	ab	ab	aa	ab	ab	ab	aa	bb	aa	aa	ab	ab	ab	aa	ab	bb	bb	ab	ab	ab	ab	ab	ab	bb	aa	ab	aa	ab	aa	bb	ab	ab	ab	bb	ab	ab	ab	ab	aa	aa	ab	bb	aa	ab	ab	ab
A03	97.83	Block3004	aaxbb	ab	ab	aa	ab	ab	ab	aa	bb	aa	aa	ab	ab	ab	aa	ab	bb	bb	ab	ab	ab	ab	ab	ab	bb	aa	ab	aa	ab	aa	bb	ab	ab	ab	bb	ab	ab	ab	ab	aa	aa	ab	bb	aa	ab	ab	ab
A03	98.33	Block3006	aaxbb	ab	bb	aa	ab	ab	ab	aa	bb	aa	aa	ab	ab	ab	aa	ab	bb	bb	ab	ab	ab	ab	ab	ab	bb	aa	ab	aa	ab	aa	bb	ab	ab	ab	bb	ab	ab	ab	ab	aa	aa	ab	bb	aa	ab	ab	ab
A03	99.08	Block3009	aaxbb	ab	ab	aa	ab	ab	ab	aa	bb	aa	aa	ab	ab	ab	aa	ab	bb	bb	ab	ab	ab	ab	ab	ab	bb	aa	ab	aa	ab	aa	bb	ab	bb	ab	bb	ab	ab	ab	ab	aa	aa	ab	bb	aa	ab	ab	ab
A03	99.58	Block3015	aaxbb	ab	ab	aa	ab	ab	ab	aa	bb	aa	aa	ab	ab	ab	aa	ab	bb	bb	ab	ab	ab	ab	ab	ab	bb	aa	ab	aa	ab	aa	bb	ab	bb	ab	bb	ab	ab	ab	ab	aa	aa	ab	bb	aa	ab	ab	ab
A03	99.83	Block3014	aaxbb	ab	ab	aa	ab	ab	ab	aa	bb	aa	aa	ab	ab	ab	aa	ab	bb	bb	ab	ab	ab	ab	ab	ab	bb	aa	ab	aa	ab	aa	bb	ab	bb	ab	bb	ab	ab	ab	ab	aa	aa	ab	bb	aa	ab	ab	ab
A03	100.08	Block3017	aaxbb	ab	ab	aa	ab	ab	ab	aa	bb	aa	aa	ab	ab	ab	aa	ab	bb	bb	ab	ab	ab	ab	ab	ab	bb	aa	ab	aa	ab	aa	bb	ab	ab	ab	bb	ab	ab	ab	ab	aa	aa	ab	bb	aa	ab	ab	ab
A03	100.33	Block3018	aaxbb	ab	ab	aa	ab	ab	ab	aa	bb	aa	aa	ab	ab	ab	aa	ab	bb	bb	ab	ab	ab	ab	ab	ab	bb	aa	ab	aa	ab	aa	bb	ab	ab	ab	bb	ab	ab	ab	ab	aa	aa	ab	bb	aa	ab	ab	ab
A03	100.83	Block3020	aaxbb	ab	ab	aa	ab	ab	ab	aa	bb	aa	aa	ab	ab	ab	aa	ab	bb	bb	ab	ab	ab	ab	ab	ab	bb	aa	ab	aa	ab	aa	bb	ab	bb	ab	bb	ab	ab	ab	bb	aa	aa	ab	bb	aa	ab	ab	ab
A03	101.33	Block3022	aaxbb	ab	bb	aa	ab	ab	ab	aa	bb	aa	aa	ab	ab	ab	aa	ab	bb	bb	ab	ab	ab	ab	ab	ab	bb	aa	ab	aa	ab	aa	bb	ab	bb	ab	bb	ab	ab	ab	bb	aa	aa	ab	bb	aa	ab	ab	ab
A03	102.08	Block3027	aaxbb	ab	ab	aa	ab	ab	ab	aa	bb	aa	aa	ab	ab	ab	aa	ab	bb	bb	ab	ab	ab	ab	ab	ab	bb	aa	ab	aa	ab	aa	bb	ab	bb	ab	bb	ab	ab	ab	bb	aa	aa	ab	bb	aa	ab	ab	ab
A03	102.58	Block3025	aaxbb	ab	ab	aa	ab	ab	ab	aa	bb	aa	aa	ab	ab	ab	aa	ab	bb	bb	ab	ab	ab	ab	ab	ab	bb	aa	ab	aa	ab	aa	bb	ab	ab	ab	bb	ab	ab	ab	bb	aa	aa	ab	bb	aa	ab	ab	ab
A03	102.83	Block3030	aaxbb	ab	ab	aa	ab	ab	ab	aa	bb	aa	aa	ab	ab	ab	aa	ab	bb	bb	ab	ab	ab	ab	ab	ab	bb	aa	ab	aa	ab	aa	bb	ab	ab	ab	bb	ab	ab	ab	bb	aa	aa	ab	bb	aa	ab	ab	ab
A03	103.08	Block3035	aaxbb	ab	ab	aa	ab	ab	ab	aa	bb	aa	aa	ab	ab	ab	aa	ab	bb	bb	ab	ab	ab	ab	ab	ab	bb	aa	ab	aa	ab	aa	bb	ab	ab	ab	bb	ab	ab	ab	bb	aa	aa	ab	bb	aa	ab	ab	ab
A03	103.08	Block3067	aaxbb	ab	ab	aa	ab	ab	ab	aa	bb	aa	aa	ab	ab	ab	aa	ab	bb	bb	ab	ab	ab	ab	ab	ab	bb	aa	ab	aa	ab	aa	bb	ab	ab	ab	bb	ab	ab	ab	bb	aa	aa	ab	bb	aa	ab	ab	ab
A03	103.08	Block3076	aaxbb	ab	ab	aa	ab	ab	ab	aa	bb	aa	aa	ab	ab	ab	aa	ab	bb	bb	ab	ab	ab	ab	ab	ab	bb	aa	ab	aa	ab	aa	bb	ab	ab	ab	bb	ab	ab	ab	bb	aa	aa	ab	bb	aa	ab	ab	ab
A03	103.58	Block3031	aaxbb	ab	ab	aa	ab	ab	ab	aa	bb	aa	aa	ab	ab	ab	aa	ab	bb	bb	ab	ab	ab	ab	ab	ab	bb	aa	ab	aa	ab	aa	bb	ab	bb	ab	bb	ab	ab	ab	bb	aa	aa	ab	bb	aa	ab	ab	ab
A03	103.83	Block3080	aaxbb	ab	ab	aa	ab	ab	ab	aa	bb	aa	aa	ab	ab	ab	aa	ab	bb	bb	ab	ab	ab	ab	ab	ab	bb	aa	ab	aa	ab	aa	bb	ab	bb	ab	bb	ab	ab	ab	bb	aa	aa	ab	bb	aa	ab	ab	ab
A03	104.08	Block3081	aaxbb	ab	ab	aa	ab	ab	ab	aa	bb	aa	aa	ab	ab	ab	aa	ab	bb	bb	ab	ab	ab	ab	ab	ab	bb	aa	ab	aa	ab	aa	bb	ab	bb	ab	bb	ab	ab	ab	bb	aa	aa	ab	bb	aa	ab	ab	ab
A03	104.33	Block3092	aaxbb	ab	ab	aa	ab	ab	ab	aa	bb	aa	aa	ab	ab	ab	aa	ab	bb	bb	ab	ab	ab	ab	ab	ab	bb	aa	ab	aa	ab	aa	bb	ab	bb	ab	bb	ab	ab	ab	bb	aa	aa	ab	bb	aa	ab	ab	ab
A03	104.58	Block3085	aaxbb	ab	ab	aa	ab	ab	ab	aa	bb	aa	aa	ab	ab	ab	aa	ab	bb	bb	ab	ab	ab	ab	ab	ab	bb	aa	ab	aa	ab	aa	bb	ab	bb	ab	bb	ab	ab	ab	bb	aa	aa	ab	bb	aa	ab	ab	ab
A03	104.58	Block3090	aaxbb	ab	ab	aa	ab	ab	ab	aa	bb	aa	aa	ab	ab	ab	aa	ab	bb	bb	ab	ab	ab	ab	ab	ab	bb	aa	ab	aa	ab	aa	bb	ab	bb	ab	bb	ab	ab	ab	bb	aa	aa	ab	bb	aa	ab	ab	ab
A03	104.58	Block3091	aaxbb	ab	ab	aa	ab	ab	ab	aa	bb	aa	aa	ab	ab	ab	aa	ab	bb	bb	ab	ab	ab	ab	ab	ab	bb	aa	ab	aa	ab	aa	bb	ab	bb	ab	bb	ab	ab	ab	bb	aa	aa	ab	bb	aa	ab	ab	ab
A03	105.08	Block3087	aaxbb	ab	ab	aa	ab	ab	ab	aa	bb	aa	aa	ab	ab	ab	aa	ab	bb	bb	ab	ab	ab	ab	ab	ab	bb	aa	ab	aa	ab	aa	bb	ab	ab	ab	bb	ab	ab	ab	bb	aa	aa	ab	bb	aa	ab	ab	ab
A03	105.58	Block3093	aaxbb	ab	ab	aa	ab	ab	ab	aa	bb	aa	aa	ab	ab	ab	aa	ab	bb	bb	ab	ab	ab	ab	ab	ab	bb	aa	ab	aa	ab	aa	bb	ab	bb	ab	bb	ab	ab	ab	bb	aa	aa	ab	bb	aa	ab	ab	ab
A03	106.08	Block3095	aaxbb	ab	ab	aa	ab	ab	ab	aa	bb	aa	aa	ab	ab	ab	aa	ab	bb	bb	ab	ab	ab	ab	ab	ab	bb	aa	ab	aa	ab	aa	bb	ab	bb	ab	bb	ab	ab	ab	bb	aa	aa	ab	bb	aa	ab	ab	ab
A03	106.58	Block3103	aaxbb	ab	ab	aa	ab	ab	ab	aa	bb	aa	aa	ab	ab	ab	aa	ab	bb	bb	ab	ab	ab	ab	ab	ab	ab	aa	ab	aa	ab	aa	bb	ab	bb	ab	bb	ab	ab	ab	bb	aa	aa	ab	bb	aa	ab	ab	ab
A03	106.83	Block3102	aaxbb	ab	ab	aa	ab	ab	ab	aa	bb	aa	aa	ab	ab	ab	aa	ab	bb	bb	ab	ab	ab	ab	ab	ab	ab	aa	ab	aa	ab	aa	bb	ab	ab	ab	bb	ab	ab	ab	bb	aa	aa	ab	bb	aa	ab	ab	ab
A03	107.33	Block3106	aaxbb	ab	ab	aa	ab	ab	ab	aa	bb	aa	aa	ab	ab	ab	aa	ab	bb	bb	ab	ab	ab	ab	ab	ab	ab	aa	ab	aa	ab	aa	bb	ab	ab	ab	bb	ab	ab	ab	bb	aa	aa	ab	bb	aa	ab	ab	ab
A03	107.58	Block3105	aaxbb	ab	ab	aa	ab	ab	ab	aa	bb	aa	aa	ab	ab	ab	aa	ab	bb	bb	ab	ab	ab	ab	ab	ab	ab	aa	ab	aa	ab	aa	bb	ab	bb	ab	bb	ab	ab	ab	bb	aa	aa	ab	bb	aa	ab	ab	ab
A03	108.08	Block3107	aaxbb	ab	ab	aa	ab	ab	ab	aa	bb	aa	aa	ab	ab	ab	aa	ab	bb	bb	ab	ab	ab	ab	ab	ab	ab	aa	ab	aa	ab	aa	bb	ab	ab	ab	bb	ab	ab	ab	bb	aa	aa	ab	bb	aa	ab	ab	ab
A03	108.33	Block3108	aaxbb	ab	ab	aa	ab	ab	ab	aa	bb	aa	aa	ab	ab	ab	aa	ab	bb	bb	ab	ab	ab	ab	ab	ab	ab	aa	ab	aa	ab	aa	bb	ab	ab	ab	bb	ab	ab	ab	bb	aa	aa	ab	bb	aa	ab	ab	ab
A03	108.33	Block3109	aaxbb	ab	ab	aa	ab	ab	ab	aa	bb	aa	aa	ab	ab	ab	aa	ab	bb	bb	ab	ab	ab	ab	ab	ab	ab	aa	ab	aa	ab	aa	bb	ab	ab	ab	bb	ab	ab	ab	bb	aa	aa	ab	bb	aa	ab	ab	ab
A03	108.33	Block3110	aaxbb	ab	ab	aa	ab	ab	ab	aa	bb	aa	aa	ab	ab	ab	aa	ab	bb	bb	ab	ab	ab	ab	ab	ab	ab	aa	ab	aa	ab	aa	bb	ab	ab	ab	bb	ab	ab	ab	bb	aa	aa	ab	bb	aa	ab	ab	ab
A03	108.33	Block3112	aaxbb	ab	ab	aa	ab	ab	ab	aa	bb	aa	aa	ab	ab	ab	aa	ab	bb	bb	ab	ab	ab	ab	ab	ab	ab	aa	ab	aa	ab	aa	bb	ab	ab	ab	bb	ab	ab	ab	bb	aa	aa	ab	bb	aa	ab	ab	ab
A03	108.58	Block3111	aaxbb	ab	ab	aa	ab	ab	ab	aa	bb	aa	aa	ab	ab	ab	aa	ab	bb	bb	ab	ab	ab	ab	ab	ab	ab	aa	ab	aa	ab	aa	bb	ab	ab	ab	bb	ab	ab	ab	bb	aa	aa	ab	bb	aa	ab	ab	ab
A03	109.08	Block3113	aaxbb	ab	ab	aa	ab	ab	ab	aa	bb	aa	aa	ab	ab	ab	aa	ab	bb	bb	ab	bb	ab	ab	ab	ab	ab	aa	ab	aa	ab	aa	bb	ab	ab	ab	bb	ab	ab	ab	bb	aa	aa	ab	bb	aa	ab	ab	ab
A03	109.33	Block3114	aaxbb	ab	ab	aa	ab	ab	ab	aa	bb	aa	aa	ab	ab	ab	aa	ab	bb	bb	ab	bb	ab	ab	ab	ab	ab	aa	ab	aa	ab	aa	bb	ab	ab	ab	bb	ab	ab	ab	bb	aa	aa	ab	bb	aa	ab	ab	ab
A03	109.83	Block3120	aaxbb	ab	ab	aa	ab	ab	ab	aa	bb	aa	aa	ab	ab	ab	aa	ab	bb	bb	ab	bb	ab	ab	ab	ab	ab	aa	ab	aa	ab	aa	bb	ab	ab	ab	bb	ab	ab	ab	bb	aa	aa	ab	bb	aa	ab	ab	ab
A03	110.08	Block3118	aaxbb	ab	ab	aa	ab	ab	ab	aa	bb	aa	aa	ab	ab	ab	aa	ab	bb	bb	ab	bb	ab	ab	ab	ab	ab	aa	ab	aa	ab	aa	bb	ab	bb	ab	bb	ab	ab	ab	bb	aa	aa	ab	bb	aa	ab	ab	ab
A03	110.08	Block3123	aaxbb	ab	ab	aa	ab	ab	ab	aa	bb	aa	aa	ab	ab	ab	aa	ab	bb	bb	ab	bb	ab	ab	ab	ab	ab	aa	ab	aa	ab	aa	bb	ab	bb	ab	bb	ab	ab	ab	bb	aa	aa	ab	bb	aa	ab	ab	ab
A03	110.58	Block3121	aaxbb	ab	ab	aa	ab	ab	ab	aa	bb	aa	aa	ab	ab	ab	aa	ab	bb	bb	ab	bb	ab	ab	ab	ab	ab	aa	ab	aa	ab	aa	bb	ab	ab	ab	bb	ab	ab	ab	bb	aa	aa	ab	bb	aa	ab	ab	ab
A03	110.58	Block3125	aaxbb	ab	ab	aa	ab	ab	ab	aa	bb	aa	aa	ab	ab	ab	aa	ab	bb	bb	ab	bb	ab	ab	ab	ab	ab	aa	ab	aa	ab	aa	bb	ab	ab	ab	bb	ab	ab	ab	bb	aa	aa	ab	bb	aa	ab	ab	ab
A03	111.08	Block3127	aaxbb	ab	ab	aa	ab	ab	ab	ab	bb	aa	aa	ab	ab	ab	aa	ab	bb	bb	ab	bb	ab	ab	ab	ab	ab	aa	ab	aa	ab	aa	bb	ab	ab	ab	bb	ab	ab	ab	bb	aa	aa	ab	bb	aa	ab	ab	ab
A03	111.08	Block3129	aaxbb	ab	ab	aa	ab	ab	ab	ab	bb	aa	aa	ab	ab	ab	aa	ab	bb	bb	ab	bb	ab	ab	ab	ab	ab	aa	ab	aa	ab	aa	bb	ab	ab	ab	bb	ab	ab	ab	bb	aa	aa	ab	bb	aa	ab	ab	ab
A03	111.58	Block3131	aaxbb	ab	ab	aa	ab	ab	ab	ab	bb	aa	aa	ab	ab	ab	aa	ab	bb	bb	ab	bb	ab	ab	ab	ab	ab	aa	ab	aa	ab	aa	bb	ab	ab	ab	bb	ab	ab	ab	bb	aa	aa	ab	bb	aa	ab	ab	ab
A03	111.83	Block3132	aaxbb	ab	ab	aa	ab	ab	ab	ab	bb	aa	aa	ab	ab	ab	aa	ab	bb	bb	ab	bb	ab	ab	ab	ab	ab	aa	ab	aa	ab	aa	bb	ab	ab	ab	bb	ab	ab	ab	bb	aa	aa	ab	bb	aa	ab	ab	ab
A03	112.08	Block3133	aaxbb	ab	bb	aa	ab	ab	ab	ab	bb	aa	aa	ab	ab	ab	aa	ab	bb	bb	ab	bb	ab	ab	ab	ab	ab	aa	ab	aa	ab	aa	bb	ab	ab	ab	bb	ab	ab	ab	bb	aa	aa	ab	bb	aa	ab	ab	ab
A03	112.33	Block3134	aaxbb	ab	bb	aa	ab	ab	ab	ab	bb	aa	aa	ab	ab	ab	aa	ab	bb	bb	ab	bb	ab	ab	ab	ab	ab	aa	ab	aa	ab	aa	bb	ab	bb	ab	bb	ab	ab	ab	bb	aa	aa	ab	bb	aa	ab	ab	ab
A03	112.83	Block3142	aaxbb	ab	bb	aa	ab	ab	ab	ab	bb	aa	aa	ab	ab	ab	aa	ab	ab	bb	ab	bb	ab	ab	ab	ab	ab	aa	ab	aa	ab	aa	bb	ab	bb	ab	bb	ab	ab	ab	bb	aa	aa	ab	bb	aa	ab	ab	ab
A03	113.33	Block3136	aaxbb	ab	ab	aa	ab	ab	ab	ab	bb	aa	aa	ab	ab	ab	aa	ab	ab	bb	ab	bb	ab	ab	ab	ab	ab	aa	ab	aa	ab	aa	bb	ab	bb	ab	bb	ab	ab	ab	bb	aa	aa	ab	bb	aa	ab	ab	ab
A03	113.58	Block3137	aaxbb	ab	ab	aa	ab	ab	ab	ab	bb	aa	aa	ab	ab	ab	aa	ab	ab	bb	ab	bb	ab	ab	ab	ab	ab	aa	ab	aa	ab	aa	bb	ab	bb	ab	bb	ab	ab	ab	bb	aa	aa	ab	bb	aa	ab	ab	ab
A03	114.33	Block3156	aaxbb	ab	ab	aa	ab	ab	ab	ab	bb	aa	aa	ab	ab	ab	aa	ab	ab	bb	ab	bb	ab	ab	ab	ab	ab	aa	ab	aa	ab	aa	bb	ab	bb	ab	bb	ab	ab	ab	bb	aa	aa	ab	bb	aa	ab	bb	ab
A03	115.08	Block3159	aaxbb	ab	bb	aa	ab	ab	ab	ab	bb	aa	aa	ab	ab	ab	aa	ab	ab	bb	ab	bb	ab	ab	ab	ab	ab	aa	ab	aa	ab	aa	bb	ab	bb	ab	bb	ab	ab	ab	bb	aa	aa	ab	bb	aa	ab	bb	ab
A03	116.081	Block3163	aaxbb	ab	ab	aa	ab	ab	ab	ab	bb	aa	aa	ab	ab	ab	aa	ab	ab	bb	ab	bb	ab	ab	ab	ab	ab	ab	ab	aa	ab	aa	bb	ab	ab	ab	bb	ab	ab	ab	bb	aa	aa	ab	bb	aa	ab	bb	ab
A03	116.581	Block3165	aaxbb	ab	ab	aa	ab	ab	ab	ab	bb	aa	aa	ab	ab	ab	aa	ab	ab	bb	ab	bb	ab	ab	ab	ab	ab	ab	ab	aa	ab	aa	bb	ab	ab	ab	bb	ab	ab	ab	bb	aa	aa	ab	bb	aa	ab	bb	ab
A03	116.831	Block3164	aaxbb	ab	ab	aa	ab	ab	ab	ab	bb	aa	aa	ab	ab	ab	aa	ab	ab	bb	ab	bb	ab	ab	ab	ab	ab	ab	ab	aa	ab	aa	bb	ab	ab	ab	bb	ab	ab	ab	bb	aa	aa	ab	bb	aa	ab	bb	ab
A03	116.831	Block3166	aaxbb	ab	ab	aa	ab	ab	ab	ab	bb	aa	aa	ab	ab	ab	aa	ab	ab	bb	ab	bb	ab	ab	ab	ab	ab	ab	ab	aa	ab	aa	bb	ab	ab	ab	bb	ab	ab	ab	bb	aa	aa	ab	bb	aa	ab	bb	ab
A03	117.581	Block3169	aaxbb	ab	bb	aa	ab	ab	ab	ab	bb	aa	aa	ab	ab	ab	aa	ab	ab	bb	ab	bb	ab	ab	ab	ab	ab	ab	ab	aa	ab	aa	bb	ab	bb	ab	bb	ab	ab	ab	bb	aa	aa	ab	bb	aa	ab	bb	ab
A03	118.331	Block3171	aaxbb	ab	bb	aa	ab	ab	ab	ab	ab	aa	aa	ab	ab	ab	aa	ab	ab	bb	ab	bb	ab	ab	ab	ab	ab	ab	ab	aa	ab	aa	bb	ab	bb	ab	bb	ab	ab	ab	bb	aa	aa	ab	bb	aa	ab	bb	ab
A03	118.831	Block3172	aaxbb	ab	bb	aa	ab	ab	ab	ab	ab	aa	aa	ab	ab	ab	aa	ab	ab	bb	ab	bb	ab	ab	ab	ab	ab	ab	ab	aa	ab	aa	bb	ab	bb	ab	bb	ab	ab	ab	bb	aa	aa	ab	bb	aa	ab	bb	ab
A03	119.081	Block3177	aaxbb	ab	bb	aa	ab	ab	ab	ab	ab	aa	aa	ab	ab	ab	aa	ab	ab	bb	ab	bb	ab	ab	ab	ab	ab	ab	ab	aa	ab	aa	bb	ab	bb	ab	bb	ab	ab	ab	bb	aa	aa	ab	bb	aa	ab	bb	ab
A03	119.831	Block3174	aaxbb	ab	ab	aa	ab	ab	ab	ab	ab	aa	aa	ab	ab	ab	aa	ab	ab	bb	ab	bb	ab	ab	ab	ab	ab	ab	ab	aa	ab	aa	bb	ab	bb	ab	bb	ab	ab	ab	bb	aa	aa	ab	bb	aa	ab	bb	ab
A03	120.081	Block3175	aaxbb	ab	ab	aa	ab	ab	ab	ab	ab	aa	aa	ab	ab	ab	aa	ab	ab	bb	ab	bb	ab	ab	ab	ab	ab	ab	ab	aa	ab	aa	bb	ab	bb	ab	bb	ab	ab	ab	bb	aa	aa	ab	bb	aa	ab	bb	ab
A03	120.581	Block3181	aaxbb	ab	ab	aa	ab	ab	ab	ab	ab	aa	aa	ab	ab	ab	aa	ab	ab	bb	ab	bb	ab	ab	ab	ab	ab	ab	ab	aa	ab	aa	bb	ab	ab	ab	bb	ab	ab	ab	bb	aa	aa	ab	bb	aa	ab	bb	ab
A03	121.081	Block3183	aaxbb	ab	ab	aa	ab	ab	ab	ab	ab	aa	aa	ab	ab	ab	aa	ab	ab	bb	ab	bb	ab	ab	ab	ab	ab	ab	ab	aa	ab	aa	bb	ab	ab	ab	bb	ab	ab	ab	bb	aa	aa	ab	bb	aa	ab	bb	ab
A03	121.081	Block3185	aaxbb	ab	ab	aa	ab	ab	ab	ab	ab	aa	aa	ab	ab	ab	aa	ab	ab	bb	ab	bb	ab	ab	ab	ab	ab	ab	ab	aa	ab	aa	bb	ab	ab	ab	bb	ab	ab	ab	bb	aa	aa	ab	bb	aa	ab	bb	ab
A03	121.831	Block3188	aaxbb	ab	ab	aa	ab	ab	ab	ab	ab	aa	aa	ab	ab	ab	aa	ab	ab	bb	ab	bb	ab	ab	ab	ab	ab	ab	ab	aa	ab	aa	bb	ab	bb	ab	bb	ab	ab	ab	bb	aa	aa	ab	bb	aa	ab	bb	ab
A03	122.831	Block3198	aaxbb	ab	ab	aa	ab	ab	ab	ab	ab	aa	aa	ab	ab	aa	aa	ab	ab	bb	ab	bb	ab	ab	ab	ab	ab	ab	ab	aa	ab	aa	bb	ab	ab	ab	bb	ab	ab	ab	bb	aa	aa	ab	bb	aa	ab	bb	ab
A03	123.331	Block3192	aaxbb	ab	bb	aa	ab	ab	ab	ab	ab	aa	aa	ab	ab	aa	aa	ab	ab	bb	ab	bb	ab	ab	ab	ab	ab	ab	ab	aa	ab	aa	bb	ab	bb	ab	bb	ab	ab	ab	bb	aa	aa	ab	bb	aa	ab	bb	ab
A03	123.331	Block3194	aaxbb	ab	bb	aa	ab	ab	ab	ab	ab	aa	aa	ab	ab	aa	aa	ab	ab	bb	ab	bb	ab	ab	ab	ab	ab	ab	ab	aa	ab	aa	bb	ab	bb	ab	bb	ab	ab	ab	bb	aa	aa	ab	bb	aa	ab	bb	ab
A03	124.081	Block3203	aaxbb	ab	ab	aa	ab	ab	ab	ab	ab	aa	aa	ab	ab	aa	aa	ab	ab	bb	ab	bb	ab	ab	ab	ab	ab	ab	ab	aa	ab	aa	bb	ab	bb	ab	bb	ab	ab	ab	bb	aa	aa	ab	bb	aa	ab	bb	ab
A03	126.383	Block3207	aaxbb	ab	ab	aa	ab	ab	ab	ab	ab	aa	aa	ab	ab	aa	aa	ab	ab	bb	ab	bb	ab	ab	ab	ab	ab	ab	ab	aa	ab	aa	bb	ab	ab	ab	bb	ab	ab	ab	bb	aa	aa	ab	bb	aa	ab	bb	ab
A03	127.383	Block3210	aaxbb	ab	ab	aa	ab	aa	ab	ab	ab	aa	aa	ab	ab	aa	aa	ab	ab	ab	ab	bb	ab	ab	ab	ab	ab	ab	ab	aa	ab	aa	bb	ab	ab	ab	bb	ab	ab	ab	bb	aa	aa	ab	bb	aa	ab	bb	ab
A03	128.383	Block3214	aaxbb	ab	ab	aa	ab	aa	ab	ab	ab	aa	aa	ab	ab	aa	aa	ab	ab	ab	ab	bb	ab	ab	ab	ab	ab	ab	ab	aa	ab	aa	bb	ab	ab	ab	bb	ab	ab	ab	bb	aa	aa	ab	bb	aa	ab	bb	ab
A03	128.633	Block3213	aaxbb	ab	ab	aa	ab	aa	ab	ab	ab	aa	aa	ab	ab	aa	aa	ab	ab	ab	ab	bb	ab	ab	ab	ab	ab	ab	ab	aa	ab	aa	bb	ab	ab	ab	bb	ab	ab	ab	bb	aa	aa	ab	bb	aa	ab	bb	ab
A03	128.633	Block3215	aaxbb	ab	ab	aa	ab	aa	ab	ab	ab	aa	aa	ab	ab	aa	aa	ab	ab	ab	ab	bb	ab	ab	ab	ab	ab	ab	ab	aa	ab	aa	bb	ab	ab	ab	bb	ab	ab	ab	bb	aa	aa	ab	bb	aa	ab	bb	ab
A03	128.633	Block3218	aaxbb	ab	ab	aa	ab	aa	ab	ab	ab	aa	aa	ab	ab	aa	aa	ab	ab	ab	ab	bb	ab	ab	ab	ab	ab	ab	ab	aa	ab	aa	bb	ab	ab	ab	bb	ab	ab	ab	bb	aa	aa	ab	bb	aa	ab	bb	ab
A03	129.633	Block3221	aaxbb	ab	ab	aa	ab	aa	ab	ab	ab	aa	aa	ab	ab	aa	aa	ab	ab	ab	ab	bb	ab	ab	ab	ab	ab	ab	ab	aa	ab	aa	bb	ab	ab	ab	bb	ab	ab	ab	ab	aa	aa	ab	bb	aa	ab	bb	ab
A04	0	Block3606	aaxbb	aa	ab	aa	aa	aa	aa	aa	aa	aa	aa	aa	aa	aa	aa	aa	aa	aa	aa	aa	aa	aa	aa	aa	aa	aa	aa	aa	ab	ab	ab	aa	ab	ab	bb	ab	aa	ab	ab	ab	bb	bb	bb	bb	ab	aa	aa
A04	0	Block3607	aaxbb	aa	ab	aa	aa	aa	aa	aa	aa	aa	aa	aa	aa	aa	aa	aa	aa	aa	aa	aa	aa	aa	aa	aa	aa	aa	aa	aa	ab	ab	ab	aa	ab	ab	bb	ab	aa	ab	ab	ab	bb	bb	bb	bb	ab	aa	aa
A04	0.25	Block3605	aaxbb	aa	ab	aa	aa	aa	aa	aa	aa	aa	aa	aa	aa	aa	aa	aa	aa	aa	aa	aa	aa	aa	aa	aa	aa	aa	aa	aa	ab	ab	ab	aa	ab	ab	bb	ab	aa	ab	ab	ab	bb	bb	bb	bb	ab	aa	aa
A04	1.001	Block3602	aaxbb	aa	ab	aa	aa	aa	aa	aa	aa	aa	aa	aa	aa	aa	aa	aa	aa	aa	aa	aa	aa	aa	aa	aa	aa	aa	aa	aa	ab	ab	ab	aa	ab	ab	bb	ab	aa	ab	ab	ab	bb	bb	bb	bb	ab	aa	aa
A04	3.803	Block3576	aaxbb	aa	ab	aa	aa	aa	aa	aa	aa	aa	aa	aa	aa	aa	aa	aa	aa	aa	aa	aa	aa	aa	aa	aa	aa	aa	aa	aa	ab	ab	ab	ab	ab	ab	bb	ab	aa	ab	ab	bb	bb	bb	ab	bb	ab	aa	aa
A04	3.803	Block3577	aaxbb	aa	ab	aa	aa	aa	aa	aa	aa	aa	aa	aa	aa	aa	aa	aa	aa	aa	aa	aa	aa	aa	aa	aa	aa	aa	aa	aa	ab	ab	ab	ab	ab	ab	bb	ab	aa	ab	ab	bb	bb	bb	ab	bb	ab	aa	aa
A04	7.644	Block3582	aaxbb	ab	ab	ab	aa	aa	ab	aa	ab	ab	bb	bb	aa	ab	ab	bb	ab	ab	ab	bb	aa	ab	bb	bb	bb	ab	aa	bb	ab	ab	ab	ab	ab	ab	bb	ab	aa	ab	ab	bb	bb	bb	ab	bb	ab	aa	aa
A04	7.894	Block3585	aaxbb	ab	ab	ab	aa	aa	ab	aa	ab	ab	bb	bb	ab	ab	ab	bb	ab	ab	ab	bb	aa	ab	bb	bb	bb	ab	aa	bb	ab	ab	ab	ab	ab	ab	bb	ab	aa	ab	ab	bb	bb	bb	ab	bb	ab	aa	aa
A04	9.145	Block3557	aaxbb	ab	ab	ab	aa	aa	ab	aa	ab	ab	bb	ab	ab	ab	ab	bb	ab	ab	ab	bb	ab	ab	bb	bb	bb	ab	aa	bb	ab	ab	ab	ab	ab	ab	bb	ab	aa	ab	aa	bb	bb	bb	ab	bb	ab	aa	aa
A04	10.645	Block3552	aaxbb	ab	ab	ab	aa	aa	ab	aa	ab	ab	bb	ab	ab	ab	ab	bb	ab	ab	ab	bb	ab	ab	bb	bb	bb	ab	aa	bb	ab	ab	ab	ab	ab	ab	bb	ab	aa	ab	aa	bb	bb	bb	ab	bb	ab	aa	aa
A04	10.895	Block3551	aaxbb	ab	ab	ab	aa	aa	ab	aa	ab	ab	bb	ab	ab	ab	ab	bb	ab	ab	ab	bb	ab	ab	bb	bb	bb	ab	aa	bb	ab	ab	ab	ab	ab	ab	bb	ab	aa	ab	aa	bb	bb	bb	ab	bb	ab	aa	aa
A04	10.895	Block3548	aaxbb	ab	ab	ab	aa	aa	ab	aa	ab	ab	bb	ab	ab	ab	ab	bb	ab	ab	ab	bb	ab	ab	bb	bb	bb	ab	aa	bb	ab	ab	ab	ab	ab	ab	bb	ab	aa	ab	aa	bb	bb	bb	ab	bb	ab	aa	aa
A04	10.895	Block3550	aaxbb	ab	ab	ab	aa	aa	ab	aa	ab	ab	bb	ab	ab	ab	ab	bb	ab	ab	ab	bb	ab	ab	bb	bb	bb	ab	aa	bb	ab	ab	ab	ab	ab	ab	bb	ab	aa	ab	aa	bb	bb	bb	ab	bb	ab	aa	aa
A04	13.698	Block3586	aaxbb	ab	ab	ab	aa	aa	ab	aa	ab	ab	bb	bb	ab	ab	ab	bb	ab	ab	ab	bb	aa	ab	bb	bb	bb	ab	aa	bb	ab	ab	ab	ab	ab	ab	bb	ab	aa	ab	ab	bb	bb	bb	ab	bb	ab	aa	aa
A04	14.198	Block3588	aaxbb	ab	ab	ab	aa	aa	ab	ab	ab	ab	bb	bb	ab	ab	ab	bb	ab	ab	ab	bb	aa	ab	bb	bb	bb	ab	aa	bb	ab	ab	ab	ab	ab	ab	bb	ab	aa	ab	ab	bb	bb	bb	ab	bb	ab	aa	aa
A04	14.698	Block3590	aaxbb	ab	ab	aa	aa	aa	ab	ab	ab	ab	bb	bb	ab	ab	ab	bb	ab	ab	ab	bb	aa	ab	bb	bb	bb	ab	aa	bb	ab	ab	ab	aa	ab	ab	bb	ab	aa	ab	ab	bb	bb	bb	ab	bb	ab	aa	aa
A04	15.448	Block3593	aaxbb	ab	ab	aa	aa	aa	ab	ab	ab	ab	bb	bb	ab	ab	ab	bb	ab	ab	ab	bb	aa	ab	bb	bb	bb	ab	aa	bb	ab	ab	ab	aa	ab	ab	bb	ab	aa	ab	ab	ab	bb	bb	ab	bb	ab	aa	aa
A04	15.698	Block3594	aaxbb	ab	ab	aa	aa	aa	ab	ab	ab	ab	bb	bb	ab	ab	ab	bb	ab	ab	ab	bb	aa	ab	bb	bb	bb	ab	aa	bb	ab	ab	ab	aa	ab	ab	bb	ab	aa	ab	ab	ab	bb	bb	ab	bb	ab	aa	aa
A04	15.948	Block3595	aaxbb	ab	ab	aa	aa	aa	ab	ab	ab	ab	bb	bb	ab	ab	ab	bb	ab	ab	ab	bb	aa	ab	bb	bb	bb	ab	aa	bb	ab	ab	ab	aa	ab	ab	bb	ab	aa	ab	ab	ab	bb	bb	ab	bb	ab	aa	aa
A04	16.698	Block3596	aaxbb	ab	ab	aa	aa	aa	aa	ab	ab	ab	bb	bb	ab	ab	ab	bb	ab	ab	ab	bb	aa	ab	bb	bb	bb	ab	aa	bb	ab	ab	ab	aa	ab	ab	bb	ab	aa	ab	ab	ab	bb	bb	bb	bb	ab	aa	aa
A04	17.719	Block3598	aaxbb	ab	ab	aa	aa	aa	aa	ab	ab	ab	aa	aa	ab	ab	ab	bb	ab	ab	ab	bb	aa	ab	aa	bb	aa	ab	aa	bb	ab	ab	ab	aa	ab	ab	bb	ab	aa	ab	ab	ab	bb	bb	bb	bb	ab	aa	aa
A04	21.627	Block3613	aaxbb	ab	ab	aa	aa	aa	aa	ab	aa	ab	aa	aa	ab	ab	ab	ab	ab	ab	ab	bb	aa	ab	aa	ab	aa	ab	aa	ab	ab	ab	ab	aa	ab	ab	bb	ab	aa	ab	ab	ab	bb	bb	bb	bb	ab	aa	aa
A04	21.877	Block3614	aaxbb	ab	ab	aa	aa	aa	aa	ab	aa	bb	aa	aa	ab	ab	ab	ab	ab	ab	ab	bb	aa	ab	aa	ab	aa	ab	aa	ab	ab	ab	ab	aa	ab	ab	bb	ab	aa	ab	ab	ab	bb	bb	bb	bb	ab	aa	aa
A04	22.382	Block3615	aaxbb	ab	ab	aa	aa	aa	bb	ab	aa	bb	aa	aa	ab	ab	ab	ab	ab	ab	ab	bb	aa	ab	bb	ab	aa	ab	aa	ab	ab	ab	ab	aa	ab	ab	bb	ab	aa	ab	ab	ab	bb	bb	bb	bb	ab	aa	aa
A04	23.143	Block3618	aaxbb	ab	ab	aa	aa	aa	bb	ab	bb	bb	aa	bb	ab	ab	ab	ab	ab	ab	ab	bb	aa	ab	bb	ab	bb	ab	aa	ab	ab	ab	ab	aa	ab	ab	bb	ab	aa	ab	ab	ab	bb	bb	bb	bb	bb	aa	aa
A04	23.393	Block3619	aaxbb	ab	ab	aa	aa	aa	bb	ab	bb	bb	aa	bb	ab	ab	ab	ab	ab	ab	ab	bb	aa	ab	bb	ab	bb	ab	aa	ab	ab	ab	ab	aa	ab	ab	bb	ab	aa	ab	ab	ab	bb	bb	bb	bb	bb	aa	aa
A04	23.643	Block3620	aaxbb	ab	ab	aa	aa	aa	bb	ab	bb	bb	aa	bb	ab	ab	ab	ab	ab	ab	ab	bb	aa	ab	bb	ab	bb	ab	aa	ab	ab	ab	ab	aa	ab	ab	bb	ab	aa	ab	ab	ab	bb	bb	bb	bb	bb	aa	aa
A04	23.893	Block3621	aaxbb	ab	ab	aa	aa	aa	bb	ab	bb	bb	aa	bb	ab	ab	ab	ab	ab	ab	ab	bb	aa	ab	bb	ab	bb	ab	aa	ab	ab	ab	ab	aa	ab	ab	bb	ab	aa	ab	ab	ab	bb	bb	bb	bb	bb	aa	aa
A04	24.143	Block3622	aaxbb	ab	ab	aa	aa	aa	bb	ab	bb	bb	aa	bb	ab	ab	ab	ab	ab	ab	ab	bb	aa	ab	bb	ab	bb	ab	aa	ab	ab	ab	ab	aa	ab	ab	bb	ab	aa	ab	ab	ab	bb	bb	bb	bb	bb	aa	aa
A04	24.143	Block3624	aaxbb	ab	ab	aa	aa	aa	bb	ab	bb	bb	aa	bb	ab	ab	ab	ab	ab	ab	ab	bb	aa	ab	bb	ab	bb	ab	aa	ab	ab	ab	ab	aa	ab	ab	bb	ab	aa	ab	ab	ab	bb	bb	bb	bb	bb	aa	aa
A04	24.143	Block3626	aaxbb	ab	ab	aa	aa	aa	bb	ab	bb	bb	aa	bb	ab	ab	ab	ab	ab	ab	ab	bb	aa	ab	bb	ab	bb	ab	aa	ab	ab	ab	ab	aa	ab	ab	bb	ab	aa	ab	ab	ab	bb	bb	bb	bb	bb	aa	aa
A04	24.643	Block3633	aaxbb	ab	ab	aa	aa	aa	bb	ab	bb	bb	aa	bb	ab	ab	ab	ab	ab	ab	ab	bb	aa	ab	bb	ab	bb	ab	aa	ab	ab	ab	ab	aa	ab	ab	bb	ab	aa	ab	ab	ab	bb	bb	bb	bb	ab	aa	aa
A04	25.143	Block3634	aaxbb	ab	ab	aa	aa	aa	bb	ab	bb	bb	aa	bb	ab	ab	ab	ab	ab	ab	ab	bb	aa	ab	bb	ab	bb	ab	aa	ab	ab	ab	ab	aa	ab	ab	bb	ab	aa	ab	ab	ab	bb	bb	bb	bb	ab	aa	aa
A04	25.393	Block3637	aaxbb	ab	ab	aa	aa	aa	bb	ab	bb	bb	aa	bb	ab	ab	ab	ab	ab	ab	ab	bb	aa	ab	bb	ab	bb	ab	aa	ab	ab	ab	ab	aa	ab	ab	bb	ab	aa	ab	ab	ab	bb	bb	bb	bb	bb	aa	aa
A04	25.393	Block3645	aaxbb	ab	ab	aa	aa	aa	bb	ab	bb	bb	aa	bb	ab	ab	ab	ab	ab	ab	ab	bb	aa	ab	bb	ab	bb	ab	aa	ab	ab	ab	ab	aa	ab	ab	bb	ab	aa	ab	ab	ab	bb	bb	bb	bb	bb	aa	aa
A04	25.393	Block3647	aaxbb	ab	ab	aa	aa	aa	bb	ab	bb	bb	aa	bb	ab	ab	ab	ab	ab	ab	ab	bb	aa	ab	bb	ab	bb	ab	aa	ab	ab	ab	ab	aa	ab	ab	bb	ab	aa	ab	ab	ab	bb	bb	bb	bb	bb	aa	aa
A04	25.643	Block3648	aaxbb	ab	ab	aa	aa	aa	bb	ab	bb	bb	aa	bb	ab	ab	ab	ab	ab	ab	bb	bb	aa	ab	bb	ab	bb	ab	aa	ab	ab	ab	ab	aa	ab	ab	bb	ab	aa	ab	ab	ab	bb	bb	bb	bb	bb	aa	aa
A04	25.643	Block3649	aaxbb	ab	ab	aa	aa	aa	bb	ab	bb	bb	aa	bb	ab	ab	ab	ab	ab	ab	bb	bb	aa	ab	bb	ab	bb	ab	aa	ab	ab	ab	ab	aa	ab	ab	bb	ab	aa	ab	ab	ab	bb	bb	bb	bb	bb	aa	aa
A04	25.643	Block3651	aaxbb	ab	ab	aa	aa	aa	bb	ab	bb	bb	aa	bb	ab	ab	ab	ab	ab	ab	bb	bb	aa	ab	bb	ab	bb	ab	aa	ab	ab	ab	ab	aa	ab	ab	bb	ab	aa	ab	ab	ab	bb	bb	bb	bb	bb	aa	aa
A04	25.893	Block3652	aaxbb	ab	ab	aa	aa	aa	bb	ab	bb	bb	aa	bb	ab	ab	ab	ab	ab	ab	bb	bb	aa	ab	bb	ab	bb	ab	aa	ab	ab	ab	ab	aa	ab	ab	bb	ab	aa	ab	ab	ab	bb	bb	bb	bb	bb	aa	aa
A04	26.143	Block3657	aaxbb	ab	ab	aa	aa	aa	bb	ab	bb	bb	aa	bb	ab	ab	ab	ab	ab	ab	bb	bb	aa	ab	bb	ab	bb	ab	aa	ab	ab	ab	ab	aa	ab	ab	bb	ab	aa	ab	ab	ab	bb	bb	bb	bb	bb	aa	aa
A04	26.143	Block3663	aaxbb	ab	ab	aa	aa	aa	bb	ab	bb	bb	aa	bb	ab	ab	ab	ab	ab	ab	bb	bb	aa	ab	bb	ab	bb	ab	aa	ab	ab	ab	ab	aa	ab	ab	bb	ab	aa	ab	ab	ab	bb	bb	bb	bb	bb	aa	aa
A04	26.143	Block3666	aaxbb	ab	ab	aa	aa	aa	bb	ab	bb	bb	aa	bb	ab	ab	ab	ab	ab	ab	bb	bb	aa	ab	bb	ab	bb	ab	aa	ab	ab	ab	ab	aa	ab	ab	bb	ab	aa	ab	ab	ab	bb	bb	bb	bb	bb	aa	aa
A04	26.143	Block3669	aaxbb	ab	ab	aa	aa	aa	bb	ab	bb	bb	aa	bb	ab	ab	ab	ab	ab	ab	bb	bb	aa	ab	bb	ab	bb	ab	aa	ab	ab	ab	ab	aa	ab	ab	bb	ab	aa	ab	ab	ab	bb	bb	bb	bb	bb	aa	aa
A04	26.143	Block3670	aaxbb	ab	ab	aa	aa	aa	bb	ab	bb	bb	aa	bb	ab	ab	ab	ab	ab	ab	bb	bb	aa	ab	bb	ab	bb	ab	aa	ab	ab	ab	ab	aa	ab	ab	bb	ab	aa	ab	ab	ab	bb	bb	bb	bb	bb	aa	aa
A04	26.393	Block3676	aaxbb	ab	ab	aa	aa	aa	bb	ab	bb	bb	aa	bb	ab	ab	ab	ab	ab	ab	bb	bb	aa	ab	bb	ab	bb	ab	aa	ab	ab	ab	ab	aa	ab	ab	bb	ab	aa	ab	ab	ab	bb	bb	bb	bb	bb	aa	aa
A04	26.643	Block3677	aaxbb	ab	ab	aa	aa	aa	bb	ab	bb	bb	aa	bb	ab	ab	ab	ab	ab	ab	bb	bb	aa	ab	bb	ab	bb	ab	aa	ab	ab	ab	ab	aa	ab	ab	bb	ab	aa	ab	ab	ab	bb	bb	bb	bb	bb	aa	aa
A04	26.893	Block3678	aaxbb	ab	ab	aa	aa	aa	bb	ab	bb	bb	aa	bb	ab	ab	ab	ab	ab	ab	bb	bb	aa	ab	bb	ab	bb	ab	aa	ab	ab	ab	ab	aa	ab	ab	bb	ab	aa	ab	ab	ab	bb	bb	bb	bb	bb	aa	aa
A04	27.143	Block3679	aaxbb	ab	ab	aa	aa	aa	bb	ab	bb	bb	aa	bb	ab	ab	ab	ab	ab	ab	bb	bb	aa	ab	bb	ab	bb	ab	aa	ab	ab	ab	ab	aa	ab	ab	bb	ab	aa	ab	ab	ab	bb	bb	bb	bb	bb	aa	aa
A04	27.393	Block3680	aaxbb	ab	ab	aa	aa	aa	bb	ab	bb	bb	aa	bb	ab	ab	ab	ab	ab	ab	bb	bb	aa	ab	bb	ab	bb	ab	aa	ab	ab	ab	ab	aa	ab	ab	bb	ab	aa	ab	ab	ab	bb	bb	bb	bb	bb	aa	aa
A04	27.643	Block3681	aaxbb	ab	ab	aa	aa	aa	bb	ab	bb	bb	aa	bb	ab	ab	ab	ab	ab	ab	bb	bb	aa	ab	bb	ab	bb	ab	aa	ab	ab	ab	ab	aa	ab	ab	bb	ab	aa	ab	ab	ab	bb	bb	bb	bb	bb	aa	aa
A04	27.893	Block3682	aaxbb	ab	ab	aa	aa	aa	bb	ab	bb	bb	aa	bb	ab	ab	ab	ab	ab	ab	bb	bb	aa	ab	bb	ab	bb	ab	aa	ab	ab	ab	ab	aa	ab	ab	bb	ab	aa	ab	ab	ab	bb	bb	bb	bb	bb	aa	aa
A04	28.143	Block3697	aaxbb	ab	ab	aa	aa	aa	bb	ab	bb	bb	aa	bb	ab	ab	ab	ab	ab	ab	bb	bb	aa	ab	bb	ab	bb	ab	aa	ab	ab	ab	ab	aa	ab	ab	bb	ab	aa	ab	ab	ab	bb	bb	bb	bb	bb	aa	aa
A04	28.143	Block3691	aaxbb	ab	ab	aa	aa	aa	bb	ab	bb	bb	aa	bb	ab	ab	ab	ab	ab	ab	bb	bb	aa	ab	bb	ab	bb	ab	aa	ab	ab	ab	ab	aa	ab	ab	bb	ab	aa	ab	ab	ab	bb	bb	bb	bb	bb	aa	aa
A04	28.143	Block3692	aaxbb	ab	ab	aa	aa	aa	bb	ab	bb	bb	aa	bb	ab	ab	ab	ab	ab	ab	bb	bb	aa	ab	bb	ab	bb	ab	aa	ab	ab	ab	ab	aa	ab	ab	bb	ab	aa	ab	ab	ab	bb	bb	bb	bb	bb	aa	aa
A04	28.143	Block3693	aaxbb	ab	ab	aa	aa	aa	bb	ab	bb	bb	aa	bb	ab	ab	ab	ab	ab	ab	bb	bb	aa	ab	bb	ab	bb	ab	aa	ab	ab	ab	ab	aa	ab	ab	bb	ab	aa	ab	ab	ab	bb	bb	bb	bb	bb	aa	aa
A04	28.143	Block3700	aaxbb	ab	ab	aa	aa	aa	bb	ab	bb	bb	aa	bb	ab	ab	ab	ab	ab	ab	bb	bb	aa	ab	bb	ab	bb	ab	aa	ab	ab	ab	ab	aa	ab	ab	bb	ab	aa	ab	ab	ab	bb	bb	bb	bb	bb	aa	aa
A04	28.393	Block3688	aaxbb	ab	ab	aa	aa	aa	bb	ab	bb	bb	aa	bb	ab	ab	ab	ab	ab	ab	bb	bb	aa	ab	bb	ab	bb	ab	aa	ab	ab	ab	ab	aa	ab	ab	bb	ab	aa	ab	ab	ab	bb	bb	bb	bb	bb	aa	aa
A04	28.893	Block3709	aaxbb	ab	ab	aa	aa	aa	bb	ab	bb	bb	aa	bb	ab	ab	ab	ab	ab	ab	bb	bb	aa	ab	bb	ab	bb	ab	aa	ab	ab	ab	ab	aa	ab	ab	bb	ab	aa	ab	ab	ab	bb	bb	bb	bb	bb	aa	aa
A04	28.893	Block3701	aaxbb	ab	ab	aa	aa	aa	bb	ab	bb	bb	aa	bb	ab	ab	ab	ab	ab	ab	bb	bb	aa	ab	bb	ab	bb	ab	aa	ab	ab	ab	ab	aa	ab	ab	bb	ab	aa	ab	ab	ab	bb	bb	bb	bb	bb	aa	aa
A04	28.893	Block3703	aaxbb	ab	ab	aa	aa	aa	bb	ab	bb	bb	aa	bb	ab	ab	ab	ab	ab	ab	bb	bb	aa	ab	bb	ab	bb	ab	aa	ab	ab	ab	ab	aa	ab	ab	bb	ab	aa	ab	ab	ab	bb	bb	bb	bb	bb	aa	aa
A04	28.893	Block3706	aaxbb	ab	ab	aa	aa	aa	bb	ab	bb	bb	aa	bb	ab	ab	ab	ab	ab	ab	bb	bb	aa	ab	bb	ab	bb	ab	aa	ab	ab	ab	ab	aa	ab	ab	bb	ab	aa	ab	ab	ab	bb	bb	bb	bb	bb	aa	aa
A04	29.143	Block3721	aaxbb	ab	ab	aa	aa	aa	bb	ab	bb	bb	aa	bb	ab	ab	ab	ab	ab	ab	bb	bb	aa	ab	bb	ab	bb	ab	aa	ab	ab	ab	ab	aa	ab	ab	bb	ab	aa	ab	ab	ab	bb	bb	bb	bb	bb	aa	aa
A04	29.143	Block3715	aaxbb	ab	ab	aa	aa	aa	bb	ab	bb	bb	aa	bb	ab	ab	ab	ab	ab	ab	bb	bb	aa	ab	bb	ab	bb	ab	aa	ab	ab	ab	ab	aa	ab	ab	bb	ab	aa	ab	ab	ab	bb	bb	bb	bb	bb	aa	aa
A04	29.393	Block3723	aaxbb	ab	ab	aa	aa	aa	bb	ab	bb	bb	aa	bb	ab	ab	ab	ab	ab	ab	bb	bb	aa	ab	bb	ab	bb	ab	aa	ab	ab	ab	ab	aa	ab	ab	bb	ab	ab	ab	ab	ab	bb	bb	bb	bb	bb	aa	aa
A04	29.393	Block3729	aaxbb	ab	ab	aa	aa	aa	bb	ab	bb	bb	aa	bb	ab	ab	ab	ab	ab	ab	bb	bb	aa	ab	bb	ab	bb	ab	aa	ab	ab	ab	ab	aa	ab	ab	bb	ab	ab	ab	ab	ab	bb	bb	bb	bb	bb	aa	aa
A04	29.393	Block3726	aaxbb	ab	ab	aa	aa	aa	bb	ab	bb	bb	aa	bb	ab	ab	ab	ab	ab	ab	bb	bb	aa	ab	bb	ab	bb	ab	aa	ab	ab	ab	ab	aa	ab	ab	bb	ab	ab	ab	ab	ab	bb	bb	bb	bb	bb	aa	aa
A04	29.393	Block3728	aaxbb	ab	ab	aa	aa	aa	bb	ab	bb	bb	aa	bb	ab	ab	ab	ab	ab	ab	bb	bb	aa	ab	bb	ab	bb	ab	aa	ab	ab	ab	ab	aa	ab	ab	bb	ab	ab	ab	ab	ab	bb	bb	bb	bb	bb	aa	aa
A04	29.893	Block3731	aaxbb	ab	ab	aa	aa	aa	bb	ab	bb	bb	aa	bb	ab	ab	ab	ab	ab	ab	bb	bb	aa	ab	bb	ab	bb	ab	aa	ab	ab	ab	ab	aa	ab	ab	bb	ab	ab	ab	ab	ab	bb	bb	bb	bb	bb	aa	aa
A04	30.143	Block3732	aaxbb	ab	ab	aa	aa	aa	bb	ab	bb	bb	aa	bb	ab	ab	ab	ab	ab	ab	bb	bb	aa	ab	bb	ab	bb	ab	aa	ab	ab	ab	ab	aa	ab	ab	bb	ab	ab	ab	bb	ab	bb	bb	bb	bb	bb	aa	aa
A04	30.393	Block3733	aaxbb	ab	ab	aa	aa	aa	bb	ab	bb	bb	aa	bb	ab	ab	ab	ab	ab	ab	bb	bb	aa	ab	bb	ab	bb	ab	aa	ab	ab	ab	ab	aa	ab	ab	bb	ab	ab	ab	bb	ab	bb	bb	bb	bb	bb	aa	aa
A04	30.643	Block3734	aaxbb	ab	ab	aa	aa	aa	bb	ab	bb	bb	aa	bb	ab	ab	ab	ab	ab	ab	bb	bb	aa	ab	bb	ab	bb	ab	aa	ab	ab	ab	ab	aa	ab	ab	bb	ab	ab	ab	bb	ab	bb	bb	bb	bb	bb	aa	aa
A04	31.643	Block3736	aaxbb	ab	ab	aa	aa	aa	bb	ab	bb	bb	aa	bb	ab	ab	ab	ab	ab	ab	bb	bb	aa	ab	bb	ab	bb	ab	aa	ab	bb	ab	ab	aa	ab	ab	bb	ab	ab	ab	bb	ab	bb	bb	bb	bb	bb	aa	aa
A04	31.643	Block3738	aaxbb	ab	ab	aa	aa	aa	bb	ab	bb	bb	aa	bb	ab	ab	ab	ab	ab	ab	bb	bb	aa	ab	bb	ab	bb	ab	aa	ab	bb	ab	ab	aa	ab	ab	bb	ab	ab	ab	bb	ab	bb	bb	bb	bb	bb	aa	aa
A04	31.893	Block3739	aaxbb	ab	ab	aa	aa	aa	bb	ab	bb	bb	aa	bb	ab	ab	ab	ab	ab	ab	bb	bb	aa	ab	bb	ab	bb	ab	aa	ab	bb	ab	ab	aa	ab	ab	bb	ab	ab	ab	bb	ab	bb	bb	bb	bb	bb	aa	aa
A04	32.143	Block3740	aaxbb	ab	ab	aa	aa	aa	bb	ab	bb	bb	aa	bb	ab	ab	ab	ab	ab	ab	bb	bb	aa	ab	bb	ab	bb	ab	aa	ab	bb	ab	ab	aa	ab	ab	bb	ab	ab	ab	bb	ab	bb	bb	bb	bb	bb	aa	aa
A04	32.393	Block3741	aaxbb	ab	ab	aa	aa	aa	bb	ab	bb	bb	aa	bb	ab	ab	ab	ab	ab	ab	bb	bb	aa	ab	bb	ab	bb	ab	aa	ab	bb	ab	ab	aa	ab	ab	bb	ab	ab	ab	bb	ab	bb	bb	bb	bb	bb	aa	aa
A04	32.643	Block3742	aaxbb	ab	ab	aa	aa	ab	bb	ab	bb	bb	aa	bb	ab	ab	ab	ab	ab	ab	bb	bb	aa	ab	bb	ab	bb	ab	aa	ab	bb	ab	ab	aa	ab	ab	bb	ab	ab	ab	bb	ab	bb	bb	bb	bb	bb	aa	aa
A04	32.893	Block3743	aaxbb	ab	ab	aa	aa	ab	bb	ab	bb	bb	aa	bb	ab	ab	ab	ab	ab	ab	bb	bb	aa	ab	bb	ab	bb	ab	aa	ab	bb	ab	ab	aa	ab	ab	bb	ab	ab	ab	bb	ab	bb	bb	bb	bb	bb	aa	aa
A04	33.894	Block3751	aaxbb	ab	ab	aa	aa	ab	bb	ab	bb	bb	aa	bb	ab	ab	ab	ab	ab	ab	bb	bb	aa	ab	bb	ab	bb	ab	aa	ab	bb	ab	ab	aa	ab	ab	bb	ab	ab	ab	bb	ab	bb	bb	bb	bb	bb	aa	aa
A04	35.144	Block3767	aaxbb	ab	ab	aa	aa	ab	bb	ab	bb	bb	aa	bb	ab	ab	ab	aa	ab	ab	bb	bb	aa	ab	bb	ab	bb	ab	aa	ab	bb	ab	ab	aa	ab	ab	bb	ab	ab	ab	bb	ab	bb	bb	bb	bb	bb	ab	aa
A04	35.394	Block3768	aaxbb	ab	ab	aa	aa	ab	bb	ab	ab	bb	aa	bb	ab	ab	ab	aa	ab	ab	bb	bb	aa	ab	bb	ab	bb	ab	aa	ab	bb	ab	ab	aa	ab	ab	bb	ab	ab	ab	bb	ab	bb	bb	bb	bb	bb	ab	aa
A04	35.894	Block3770	aaxbb	ab	ab	aa	aa	ab	bb	ab	ab	bb	aa	bb	ab	ab	ab	aa	ab	ab	bb	bb	aa	ab	bb	ab	bb	ab	aa	ab	bb	ab	ab	aa	ab	ab	bb	ab	ab	ab	bb	ab	bb	bb	bb	bb	bb	ab	aa
A04	35.894	Block3771	aaxbb	ab	ab	aa	aa	ab	bb	ab	ab	bb	aa	bb	ab	ab	ab	aa	ab	ab	bb	bb	aa	ab	bb	ab	bb	ab	aa	ab	bb	ab	ab	aa	ab	ab	bb	ab	ab	ab	bb	ab	bb	bb	bb	bb	bb	ab	aa
A04	35.894	Block3772	aaxbb	ab	ab	aa	aa	ab	bb	ab	ab	bb	aa	bb	ab	ab	ab	aa	ab	ab	bb	bb	aa	ab	bb	ab	bb	ab	aa	ab	bb	ab	ab	aa	ab	ab	bb	ab	ab	ab	bb	ab	bb	bb	bb	bb	bb	ab	aa
A04	36.644	Block3775	aaxbb	ab	ab	aa	aa	ab	bb	ab	ab	bb	aa	bb	ab	ab	ab	aa	ab	ab	bb	bb	aa	ab	bb	ab	bb	ab	aa	ab	bb	ab	ab	ab	ab	ab	bb	ab	ab	ab	bb	ab	bb	bb	bb	bb	bb	ab	aa
A04	36.894	Block3776	aaxbb	ab	ab	aa	aa	ab	bb	ab	ab	bb	aa	bb	ab	ab	ab	aa	ab	ab	bb	bb	aa	ab	bb	ab	bb	ab	aa	ab	bb	ab	ab	ab	ab	ab	bb	ab	ab	ab	bb	ab	bb	bb	bb	bb	bb	ab	aa
A04	37.394	Block3780	aaxbb	ab	ab	aa	aa	ab	bb	ab	ab	bb	aa	bb	ab	ab	ab	aa	ab	ab	bb	bb	aa	ab	bb	ab	bb	ab	aa	ab	bb	ab	ab	ab	ab	ab	bb	ab	ab	ab	bb	ab	bb	bb	bb	bb	bb	ab	aa
A04	38.144	Block3784	aaxbb	ab	ab	aa	aa	ab	bb	ab	ab	bb	aa	bb	ab	ab	ab	aa	ab	aa	bb	bb	aa	ab	bb	ab	bb	ab	aa	ab	bb	ab	ab	ab	ab	ab	bb	ab	ab	ab	bb	ab	bb	bb	bb	bb	bb	ab	aa
A04	38.644	Block3786	aaxbb	ab	ab	aa	aa	ab	bb	ab	ab	bb	aa	bb	ab	ab	ab	ab	ab	aa	bb	bb	aa	ab	bb	ab	bb	ab	aa	ab	bb	ab	ab	ab	ab	ab	bb	ab	ab	ab	bb	ab	bb	bb	bb	bb	bb	ab	aa
A04	38.894	Block3787	aaxbb	ab	ab	aa	aa	ab	bb	ab	ab	bb	aa	bb	ab	ab	ab	ab	ab	aa	bb	bb	aa	ab	bb	ab	bb	ab	aa	ab	bb	ab	ab	ab	ab	ab	bb	ab	ab	ab	bb	ab	bb	bb	bb	bb	bb	ab	aa
A04	40.394	Block3794	aaxbb	ab	ab	aa	aa	bb	bb	ab	ab	bb	aa	bb	ab	ab	ab	ab	ab	aa	bb	bb	aa	ab	bb	ab	bb	ab	aa	ab	bb	ab	ab	ab	ab	ab	bb	ab	ab	ab	bb	aa	bb	bb	bb	bb	bb	ab	aa
A04	40.644	Block3795	aaxbb	ab	ab	aa	aa	bb	bb	ab	ab	bb	aa	bb	ab	ab	ab	ab	ab	aa	bb	bb	aa	ab	bb	ab	bb	ab	aa	ab	bb	ab	ab	ab	ab	ab	bb	ab	ab	ab	bb	aa	bb	bb	bb	bb	bb	ab	aa
A04	40.894	Block3796	aaxbb	ab	ab	aa	aa	bb	bb	ab	ab	bb	aa	bb	ab	ab	ab	ab	ab	aa	bb	bb	aa	ab	bb	ab	bb	ab	aa	ab	bb	ab	ab	ab	ab	ab	bb	ab	ab	ab	bb	aa	bb	bb	bb	bb	bb	ab	aa
A04	41.144	Block3797	aaxbb	ab	ab	aa	aa	bb	bb	ab	ab	bb	aa	bb	ab	ab	ab	ab	ab	aa	bb	bb	aa	ab	bb	ab	bb	ab	aa	ab	bb	ab	ab	ab	ab	ab	bb	ab	ab	ab	bb	aa	bb	bb	bb	bb	bb	ab	aa
A04	41.394	Block3798	aaxbb	ab	ab	aa	aa	bb	bb	ab	ab	bb	aa	bb	ab	ab	ab	ab	ab	aa	bb	bb	aa	ab	bb	ab	bb	ab	aa	ab	bb	ab	ab	ab	ab	ab	bb	ab	ab	ab	bb	aa	bb	bb	bb	bb	bb	ab	aa
A04	42.145	Block3801	aaxbb	ab	ab	aa	aa	bb	bb	ab	ab	bb	aa	bb	ab	ab	ab	ab	ab	aa	bb	bb	aa	ab	bb	ab	bb	ab	aa	ab	bb	ab	ab	ab	ab	ab	bb	ab	ab	ab	bb	aa	bb	bb	bb	bb	bb	ab	aa
A04	42.395	Block3802	aaxbb	ab	ab	aa	aa	bb	bb	ab	ab	bb	aa	bb	ab	ab	ab	ab	ab	aa	bb	bb	aa	ab	bb	ab	bb	ab	aa	ab	bb	ab	ab	ab	ab	ab	bb	ab	ab	ab	bb	aa	bb	bb	bb	bb	bb	ab	aa
A04	42.645	Block3803	aaxbb	ab	ab	aa	aa	bb	bb	ab	ab	bb	aa	bb	ab	ab	ab	ab	ab	aa	bb	bb	aa	ab	bb	ab	bb	ab	aa	ab	bb	ab	ab	ab	ab	ab	bb	ab	ab	ab	bb	aa	bb	bb	bb	bb	bb	ab	aa
A04	43.395	Block3806	aaxbb	ab	ab	aa	aa	bb	bb	ab	ab	bb	aa	bb	ab	ab	ab	ab	ab	aa	bb	bb	aa	ab	bb	ab	bb	ab	aa	ab	bb	ab	ab	ab	ab	ab	bb	aa	ab	ab	bb	aa	bb	bb	bb	bb	bb	ab	aa
A04	43.395	Block3808	aaxbb	ab	ab	aa	aa	bb	bb	ab	ab	bb	aa	bb	ab	ab	ab	ab	ab	aa	bb	bb	aa	ab	bb	ab	bb	ab	aa	ab	bb	ab	ab	ab	ab	ab	bb	aa	ab	ab	bb	aa	bb	bb	bb	bb	bb	ab	aa
A04	43.645	Block3809	aaxbb	ab	ab	aa	aa	bb	bb	ab	ab	bb	aa	bb	ab	ab	ab	ab	ab	aa	bb	bb	aa	ab	bb	ab	bb	ab	aa	ab	bb	ab	ab	ab	ab	ab	bb	aa	ab	ab	bb	aa	bb	bb	bb	bb	bb	ab	aa
A04	44.145	Block3812	aaxbb	ab	ab	aa	aa	bb	bb	ab	ab	bb	aa	bb	ab	ab	ab	ab	ab	aa	bb	bb	aa	ab	bb	ab	bb	ab	aa	ab	bb	ab	bb	ab	ab	ab	bb	aa	ab	ab	bb	aa	bb	bb	bb	bb	bb	ab	aa
A04	44.145	Block3813	aaxbb	ab	ab	aa	aa	bb	bb	ab	ab	bb	aa	bb	ab	ab	ab	ab	ab	aa	bb	bb	aa	ab	bb	ab	bb	ab	aa	ab	bb	ab	bb	ab	ab	ab	bb	aa	ab	ab	bb	aa	bb	bb	bb	bb	bb	ab	aa
A04	44.395	Block3814	aaxbb	ab	ab	aa	aa	bb	bb	ab	ab	bb	aa	bb	ab	ab	ab	ab	ab	aa	bb	bb	aa	ab	bb	ab	bb	ab	aa	ab	bb	ab	bb	ab	ab	ab	ab	aa	ab	ab	bb	aa	bb	bb	bb	bb	bb	ab	aa
A04	44.645	Block3815	aaxbb	ab	ab	aa	aa	bb	bb	ab	ab	bb	aa	bb	ab	ab	ab	ab	ab	aa	bb	bb	aa	ab	bb	ab	bb	ab	aa	ab	bb	ab	bb	ab	ab	ab	ab	aa	ab	ab	bb	aa	bb	bb	bb	bb	bb	ab	aa
A04	44.895	Block3816	aaxbb	ab	ab	aa	aa	bb	bb	ab	ab	bb	aa	bb	ab	ab	ab	ab	ab	aa	bb	bb	aa	ab	bb	ab	bb	ab	aa	ab	bb	ab	bb	ab	ab	ab	ab	aa	ab	ab	bb	aa	bb	bb	bb	bb	bb	ab	aa
A04	45.645	Block3819	aaxbb	aa	ab	aa	aa	bb	bb	ab	ab	bb	aa	bb	ab	ab	aa	ab	ab	aa	bb	bb	aa	ab	bb	ab	bb	ab	aa	ab	bb	ab	bb	ab	ab	ab	ab	aa	ab	ab	bb	aa	bb	bb	bb	bb	bb	ab	aa
A04	47.445	Block3945	aaxbb	ab	ab	aa	aa	bb	bb	ab	ab	bb	aa	bb	ab	ab	ab	ab	ab	aa	bb	bb	aa	ab	bb	ab	bb	ab	aa	ab	bb	ab	bb	ab	ab	ab	ab	aa	ab	ab	bb	aa	ab	bb	bb	bb	bb	ab	aa
A04	47.695	Block3974	aaxbb	ab	ab	aa	aa	bb	bb	ab	ab	bb	aa	bb	ab	ab	ab	ab	ab	aa	bb	bb	aa	ab	bb	ab	bb	ab	aa	ab	bb	ab	bb	ab	ab	ab	ab	aa	ab	ab	bb	aa	ab	bb	bb	bb	bb	ab	aa
A04	48.696	Block4111	aaxbb	ab	ab	aa	aa	bb	bb	ab	ab	bb	aa	bb	ab	ab	ab	ab	ab	aa	bb	bb	aa	ab	bb	ab	bb	ab	aa	ab	bb	ab	bb	ab	ab	ab	ab	ab	ab	ab	bb	aa	ab	bb	bb	bb	bb	ab	aa
A04	51.111	Block4119	aaxbb	aa	ab	aa	aa	aa	aa	aa	aa	aa	aa	aa	ab	ab	aa	ab	ab	aa	aa	aa	aa	ab	ab	ab	aa	ab	aa	aa	bb	ab	bb	ab	ab	ab	ab	ab	ab	ab	bb	aa	ab	bb	bb	bb	bb	ab	aa
A04	54.717	Block4084	aaxbb	ab	ab	aa	aa	ab	ab	aa	aa	ab	aa	ab	aa	ab	aa	aa	aa	aa	ab	ab	aa	aa	ab	aa	ab	aa	aa	aa	bb	ab	bb	ab	ab	ab	ab	ab	ab	ab	bb	aa	ab	bb	bb	bb	bb	ab	aa
A04	57.821	Block3993	aaxbb	ab	ab	aa	aa	ab	ab	ab	ab	ab	aa	ab	ab	ab	ab	ab	ab	aa	ab	ab	aa	ab	ab	ab	ab	ab	aa	ab	bb	ab	bb	ab	ab	ab	ab	ab	ab	ab	bb	aa	ab	bb	bb	bb	bb	ab	aa
A04	58.071	Block3988	aaxbb	ab	ab	aa	aa	ab	ab	ab	ab	ab	aa	ab	ab	ab	ab	ab	ab	aa	ab	ab	aa	ab	ab	ab	ab	ab	aa	ab	bb	ab	bb	ab	ab	ab	ab	aa	ab	ab	bb	aa	ab	bb	bb	bb	bb	ab	aa
A04	58.071	Block3992	aaxbb	ab	ab	aa	aa	ab	ab	ab	ab	ab	aa	ab	ab	ab	ab	ab	ab	aa	ab	ab	aa	ab	ab	ab	ab	ab	aa	ab	bb	ab	bb	ab	ab	ab	ab	aa	ab	ab	bb	aa	ab	bb	bb	bb	bb	ab	aa
A04	58.821	Block3925	aaxbb	ab	ab	aa	aa	ab	ab	ab	ab	ab	aa	ab	ab	ab	ab	ab	ab	aa	ab	ab	aa	ab	ab	ab	ab	ab	aa	ab	bb	ab	bb	ab	ab	ab	ab	aa	ab	ab	bb	aa	ab	bb	bb	bb	bb	ab	aa
A04	60.872	Block3943	aaxbb	ab	ab	aa	aa	aa	aa	ab	ab	aa	aa	aa	ab	ab	ab	ab	ab	aa	aa	aa	aa	ab	aa	ab	aa	ab	aa	ab	bb	ab	bb	ab	ab	ab	ab	aa	ab	ab	bb	aa	ab	bb	bb	bb	bb	ab	aa
A04	61.622	Block3922	aaxbb	aa	ab	aa	aa	aa	aa	ab	ab	aa	aa	aa	ab	ab	aa	ab	ab	aa	aa	aa	aa	ab	aa	aa	aa	ab	aa	ab	bb	ab	bb	ab	ab	ab	ab	aa	ab	ab	bb	aa	ab	bb	bb	bb	bb	ab	aa
A04	63.924	Block3935	aaxbb	aa	ab	aa	aa	aa	aa	aa	aa	aa	aa	aa	aa	aa	aa	aa	aa	aa	aa	aa	aa	aa	aa	aa	aa	aa	aa	aa	bb	ab	bb	ab	ab	ab	ab	aa	ab	ab	bb	aa	ab	bb	bb	bb	bb	ab	aa
A04	63.924	Block3936	aaxbb	aa	ab	aa	aa	aa	aa	aa	aa	aa	aa	aa	aa	aa	aa	aa	aa	aa	aa	aa	aa	aa	aa	aa	aa	aa	aa	aa	bb	ab	bb	ab	ab	ab	ab	aa	ab	ab	bb	aa	ab	bb	bb	bb	bb	ab	aa
A04	64.174	Block3823	aaxbb	aa	ab	aa	aa	aa	aa	aa	aa	aa	aa	aa	aa	aa	aa	aa	aa	aa	aa	aa	aa	aa	aa	aa	aa	aa	aa	aa	bb	ab	bb	ab	ab	ab	ab	aa	ab	ab	bb	aa	ab	bb	bb	bb	bb	ab	aa
A04	65.925	Block4082	aaxbb	aa	ab	aa	aa	aa	aa	aa	aa	aa	aa	aa	aa	aa	aa	aa	aa	aa	aa	aa	aa	aa	aa	aa	aa	aa	aa	aa	bb	ab	bb	ab	ab	ab	ab	ab	ab	ab	bb	aa	ab	bb	bb	bb	bb	ab	aa
A04	70.841	Block4225	aaxbb	aa	aa	aa	aa	aa	aa	aa	aa	aa	aa	aa	aa	aa	aa	aa	aa	aa	aa	aa	aa	aa	aa	aa	aa	aa	aa	aa	bb	ab	bb	ab	ab	ab	ab	ab	ab	ab	bb	aa	ab	bb	bb	bb	bb	ab	ab
A04	71.091	Block4226	aaxbb	aa	aa	aa	aa	aa	aa	aa	aa	aa	aa	aa	aa	aa	aa	aa	aa	aa	aa	aa	aa	aa	aa	aa	aa	aa	aa	aa	bb	ab	bb	ab	ab	ab	ab	ab	ab	ab	bb	aa	ab	bb	bb	bb	bb	ab	ab
A04	71.341	Block4227	aaxbb	aa	aa	aa	aa	aa	aa	aa	aa	aa	aa	aa	aa	aa	aa	aa	aa	aa	aa	aa	aa	aa	aa	aa	aa	aa	aa	aa	bb	ab	bb	ab	ab	bb	ab	ab	ab	ab	bb	aa	ab	bb	bb	bb	bb	ab	ab
A04	71.591	Block4230	aaxbb	aa	aa	aa	aa	aa	aa	aa	aa	aa	aa	aa	aa	aa	aa	aa	aa	aa	aa	aa	aa	aa	aa	aa	aa	aa	aa	aa	bb	ab	bb	ab	ab	bb	ab	ab	ab	ab	bb	aa	ab	bb	bb	bb	bb	ab	ab
A04	71.841	Block4229	aaxbb	aa	aa	aa	aa	aa	aa	aa	aa	aa	aa	aa	aa	aa	aa	aa	aa	aa	aa	aa	aa	aa	aa	aa	aa	aa	aa	aa	bb	ab	bb	ab	ab	ab	ab	ab	ab	ab	bb	aa	ab	bb	bb	bb	bb	ab	ab
A04	72.341	Block4231	aaxbb	aa	ab	aa	aa	aa	aa	aa	aa	aa	aa	aa	aa	aa	aa	aa	aa	aa	aa	aa	aa	aa	aa	aa	aa	aa	aa	aa	bb	ab	bb	ab	ab	bb	ab	ab	ab	ab	bb	aa	ab	bb	bb	bb	bb	ab	ab
A04	72.591	Block4232	aaxbb	aa	ab	aa	aa	aa	aa	aa	aa	aa	aa	aa	aa	aa	aa	aa	aa	aa	aa	aa	aa	aa	aa	aa	aa	aa	aa	aa	bb	ab	bb	ab	ab	bb	ab	ab	ab	ab	bb	aa	ab	bb	bb	bb	bb	ab	ab
A04	72.841	Block4233	aaxbb	aa	ab	aa	aa	aa	aa	aa	aa	aa	aa	aa	aa	aa	aa	aa	aa	aa	aa	aa	aa	aa	aa	aa	aa	aa	aa	aa	bb	ab	bb	ab	ab	bb	ab	ab	ab	ab	bb	aa	ab	bb	bb	bb	bb	ab	bb
A04	73.091	Block4259	aaxbb	aa	aa	aa	aa	aa	aa	aa	aa	aa	aa	aa	aa	aa	aa	aa	aa	aa	aa	aa	aa	aa	aa	aa	aa	aa	aa	aa	bb	ab	bb	ab	ab	bb	ab	ab	ab	ab	bb	aa	ab	bb	bb	bb	bb	ab	bb
A04	73.091	Block4265	aaxbb	aa	aa	aa	aa	aa	aa	aa	aa	aa	aa	aa	aa	aa	aa	aa	aa	aa	aa	aa	aa	aa	aa	aa	aa	aa	aa	aa	bb	ab	bb	ab	ab	bb	ab	ab	ab	ab	bb	aa	ab	bb	bb	bb	bb	ab	bb
A04	73.841	Block4344	aaxbb	aa	aa	aa	aa	aa	aa	aa	aa	aa	aa	aa	aa	aa	aa	aa	aa	aa	aa	aa	aa	aa	aa	aa	aa	aa	aa	aa	bb	ab	bb	ab	ab	bb	ab	ab	ab	ab	bb	aa	ab	bb	bb	bb	bb	ab	bb
A04	75.591	Block4543	aaxbb	aa	aa	aa	aa	aa	aa	aa	aa	aa	aa	aa	aa	aa	aa	aa	aa	aa	aa	aa	aa	aa	aa	aa	aa	aa	aa	aa	bb	ab	bb	ab	ab	bb	ab	ab	ab	ab	ab	aa	ab	bb	bb	bb	bb	ab	bb
A04	75.591	Block4549	aaxbb	aa	aa	aa	aa	aa	aa	aa	aa	aa	aa	aa	aa	aa	aa	aa	aa	aa	aa	aa	aa	aa	aa	aa	aa	aa	aa	aa	bb	ab	bb	ab	ab	bb	ab	ab	ab	ab	ab	aa	ab	bb	bb	bb	bb	ab	bb
A04	76.091	Block4554	aaxbb	aa	ab	aa	aa	aa	aa	aa	aa	aa	aa	aa	aa	aa	aa	aa	aa	aa	aa	aa	aa	aa	aa	aa	aa	aa	aa	aa	bb	ab	bb	ab	ab	bb	ab	ab	ab	ab	ab	aa	ab	bb	bb	bb	bb	ab	bb
A04	76.591	Block4546	aaxbb	aa	ab	aa	aa	aa	aa	aa	aa	aa	aa	aa	aa	aa	aa	aa	aa	aa	aa	aa	aa	aa	aa	aa	aa	aa	aa	aa	bb	ab	bb	ab	ab	bb	ab	ab	ab	ab	ab	aa	ab	bb	bb	bb	bb	ab	bb
A04	79.093	Block4328	aaxbb	aa	ab	aa	ab	aa	ab	aa	aa	aa	aa	aa	aa	aa	aa	aa	aa	aa	aa	aa	aa	aa	aa	aa	aa	aa	ab	aa	bb	ab	bb	ab	ab	bb	ab	ab	ab	ab	bb	aa	ab	bb	bb	bb	bb	ab	bb
A04	80.094	Block4323	aaxbb	aa	ab	aa	aa	aa	aa	ab	ab	aa	aa	aa	aa	aa	aa	aa	aa	aa	aa	aa	aa	aa	aa	aa	aa	aa	ab	aa	bb	ab	bb	ab	ab	bb	ab	ab	ab	ab	bb	aa	ab	bb	bb	bb	bb	ab	bb
A04	81.094	Block4298	aaxbb	aa	aa	aa	aa	aa	aa	aa	aa	aa	aa	aa	aa	aa	aa	aa	aa	aa	aa	aa	aa	aa	aa	aa	aa	aa	aa	aa	bb	ab	bb	ab	ab	bb	ab	ab	ab	ab	bb	aa	ab	bb	bb	bb	bb	ab	bb
A04	83.095	Block4300	aaxbb	aa	aa	aa	aa	ab	aa	aa	aa	ab	aa	ab	aa	aa	aa	aa	aa	aa	ab	ab	aa	ab	ab	aa	ab	aa	aa	aa	bb	ab	bb	ab	ab	bb	ab	ab	ab	ab	bb	aa	ab	bb	bb	bb	bb	ab	bb
A04	85.146	Block4282	aaxbb	aa	ab	aa	ab	ab	ab	ab	aa	ab	aa	ab	ab	ab	aa	aa	ab	aa	ab	ab	aa	ab	ab	ab	ab	aa	aa	aa	bb	ab	bb	ab	ab	bb	ab	ab	ab	ab	bb	aa	ab	bb	bb	bb	bb	ab	bb
A04	86.146	Block4287	aaxbb	aa	ab	aa	ab	ab	ab	ab	aa	ab	aa	ab	ab	ab	aa	ab	aa	aa	ab	ab	aa	ab	ab	aa	ab	aa	aa	ab	bb	ab	bb	ab	ab	bb	ab	ab	ab	ab	bb	aa	ab	bb	bb	bb	bb	ab	bb
A04	87.146	Block4290	aaxbb	aa	ab	aa	aa	ab	ab	ab	ab	ab	aa	ab	ab	ab	aa	ab	ab	aa	ab	ab	aa	ab	ab	aa	ab	aa	ab	ab	bb	ab	bb	ab	ab	bb	ab	ab	ab	ab	bb	aa	ab	bb	bb	bb	bb	ab	bb
A04	88.146	Block4304	aaxbb	aa	ab	aa	aa	ab	ab	aa	aa	ab	aa	ab	ab	aa	aa	ab	ab	aa	ab	ab	aa	ab	ab	ab	ab	aa	ab	ab	bb	ab	bb	ab	ab	bb	ab	ab	ab	ab	bb	aa	ab	bb	bb	bb	bb	ab	bb
A04	89.397	Block4352	aaxbb	aa	ab	aa	aa	ab	ab	aa	ab	ab	aa	ab	ab	ab	aa	aa	aa	aa	ab	ab	aa	ab	ab	ab	ab	aa	ab	ab	bb	ab	bb	ab	ab	bb	ab	ab	ab	ab	bb	aa	ab	bb	bb	bb	bb	ab	bb
A04	90.397	Block4355	aaxbb	aa	ab	aa	ab	ab	ab	aa	ab	ab	aa	ab	ab	ab	aa	ab	ab	aa	ab	ab	aa	ab	ab	ab	ab	aa	aa	ab	bb	ab	bb	ab	ab	bb	ab	ab	ab	ab	bb	aa	ab	bb	bb	bb	bb	ab	bb
A04	91.397	Block4369	aaxbb	aa	ab	aa	ab	ab	ab	ab	ab	ab	aa	ab	ab	ab	ab	ab	ab	aa	ab	ab	aa	ab	ab	ab	ab	aa	ab	ab	bb	ab	bb	ab	ab	bb	ab	ab	ab	ab	ab	aa	ab	bb	bb	bb	bb	ab	bb
A04	91.897	Block4309	aaxbb	aa	ab	aa	ab	ab	ab	ab	ab	ab	aa	ab	ab	ab	ab	ab	ab	aa	ab	ab	aa	ab	ab	ab	ab	aa	ab	ab	bb	ab	bb	ab	ab	bb	ab	ab	ab	ab	bb	aa	ab	bb	bb	bb	bb	ab	bb
A04	93.698	Block4273	aaxbb	aa	ab	aa	ab	aa	ab	ab	ab	aa	aa	aa	ab	ab	ab	ab	ab	aa	ab	aa	aa	aa	aa	ab	aa	aa	ab	ab	bb	ab	bb	ab	ab	bb	ab	ab	ab	ab	bb	aa	ab	bb	bb	bb	bb	ab	bb
A04	100.693	Block4597	aaxbb	aa	ab	aa	ab	aa	ab	ab	ab	aa	aa	aa	ab	ab	ab	ab	aa	aa	ab	aa	aa	aa	aa	ab	aa	ab	ab	ab	bb	ab	bb	ab	ab	bb	ab	ab	ab	ab	ab	aa	ab	ab	bb	bb	bb	ab	bb
A04	101.975	Block4599	aaxbb	aa	ab	aa	ab	bb	ab	ab	ab	aa	aa	bb	ab	ab	ab	ab	bb	aa	ab	bb	aa	aa	bb	ab	aa	ab	ab	ab	bb	ab	bb	ab	ab	bb	ab	ab	ab	ab	ab	aa	ab	ab	bb	bb	bb	ab	bb
A04	103.487	Block4604	aaxbb	aa	ab	aa	ab	bb	ab	ab	ab	bb	aa	bb	ab	ab	ab	ab	bb	aa	ab	bb	aa	bb	bb	ab	bb	ab	ab	ab	bb	ab	bb	ab	ab	bb	ab	ab	ab	ab	ab	aa	ab	ab	bb	bb	bb	ab	bb
A04	104.237	Block4608	aaxbb	aa	ab	aa	ab	bb	ab	ab	ab	bb	aa	bb	ab	ab	ab	ab	bb	aa	ab	bb	aa	bb	bb	ab	bb	ab	ab	ab	bb	ab	bb	ab	ab	bb	ab	ab	ab	ab	ab	aa	ab	ab	bb	bb	bb	ab	bb
A04	104.237	Block4607	aaxbb	aa	ab	aa	ab	bb	ab	ab	ab	bb	aa	bb	ab	ab	ab	ab	bb	aa	ab	bb	aa	bb	bb	ab	bb	ab	ab	ab	bb	ab	bb	ab	ab	bb	ab	ab	ab	ab	ab	aa	ab	ab	bb	bb	bb	ab	bb
A04	104.237	Block4609	aaxbb	aa	ab	aa	ab	bb	ab	ab	ab	bb	aa	bb	ab	ab	ab	ab	bb	aa	ab	bb	aa	bb	bb	ab	bb	ab	ab	ab	bb	ab	bb	ab	ab	bb	ab	ab	ab	ab	ab	aa	ab	ab	bb	bb	bb	ab	bb
A04	104.237	Block4613	aaxbb	aa	ab	aa	ab	bb	ab	ab	ab	bb	aa	bb	ab	ab	ab	ab	bb	aa	ab	bb	aa	bb	bb	ab	bb	ab	ab	ab	bb	ab	bb	ab	ab	bb	ab	ab	ab	ab	ab	aa	ab	ab	bb	bb	bb	ab	bb
A04	104.487	Block4614	aaxbb	aa	ab	aa	ab	bb	ab	ab	ab	bb	aa	bb	ab	ab	ab	ab	bb	aa	ab	bb	aa	bb	bb	ab	bb	ab	ab	ab	bb	ab	bb	ab	ab	bb	ab	ab	ab	ab	ab	aa	ab	ab	bb	bb	bb	ab	bb
A04	104.487	Block4611	aaxbb	aa	ab	aa	ab	bb	ab	ab	ab	bb	aa	bb	ab	ab	ab	ab	bb	aa	ab	bb	aa	bb	bb	ab	bb	ab	ab	ab	bb	ab	bb	ab	ab	bb	ab	ab	ab	ab	ab	aa	ab	ab	bb	bb	bb	ab	bb
A04	104.987	Block4615	aaxbb	aa	ab	aa	ab	bb	ab	ab	ab	bb	aa	bb	ab	ab	ab	ab	bb	aa	ab	bb	aa	bb	bb	ab	bb	ab	ab	ab	bb	ab	bb	ab	ab	bb	ab	ab	ab	ab	ab	aa	ab	ab	bb	bb	bb	ab	bb
A04	107.539	Block4621	aaxbb	aa	ab	aa	bb	bb	ab	ab	ab	ab	aa	bb	ab	ab	ab	ab	bb	aa	aa	bb	aa	bb	bb	ab	bb	ab	ab	ab	bb	ab	bb	ab	ab	bb	ab	ab	ab	aa	ab	aa	ab	ab	bb	bb	bb	ab	bb
A04	108.039	Block4623	aaxbb	aa	aa	aa	bb	bb	ab	ab	ab	ab	aa	bb	ab	ab	ab	ab	bb	aa	aa	bb	aa	bb	bb	ab	bb	ab	ab	ab	bb	ab	bb	ab	ab	bb	ab	ab	ab	aa	ab	aa	ab	ab	bb	bb	bb	ab	bb
A04	108.289	Block4625	aaxbb	aa	aa	aa	bb	bb	ab	ab	ab	ab	aa	bb	ab	ab	ab	ab	bb	aa	aa	bb	aa	bb	bb	ab	bb	ab	ab	ab	bb	ab	bb	ab	ab	bb	ab	ab	ab	aa	ab	aa	ab	ab	bb	bb	bb	ab	bb
A04	108.539	Block4627	aaxbb	aa	ab	aa	bb	bb	ab	ab	ab	ab	aa	bb	ab	ab	ab	ab	bb	aa	aa	bb	aa	bb	bb	ab	bb	ab	ab	ab	bb	ab	bb	ab	ab	bb	ab	ab	ab	aa	ab	aa	ab	ab	bb	bb	bb	ab	bb
A04	108.789	Block4628	aaxbb	aa	ab	aa	bb	bb	ab	ab	ab	ab	aa	bb	ab	ab	ab	ab	bb	aa	aa	bb	aa	bb	bb	ab	bb	ab	ab	ab	bb	ab	bb	ab	ab	bb	ab	ab	ab	aa	ab	aa	ab	ab	bb	bb	bb	ab	bb
A04	109.289	Block4630	aaxbb	aa	ab	aa	bb	bb	ab	ab	ab	ab	aa	bb	ab	ab	ab	ab	bb	aa	aa	bb	aa	bb	bb	ab	bb	ab	ab	ab	bb	ab	bb	ab	ab	bb	ab	ab	ab	aa	ab	aa	ab	ab	bb	bb	bb	ab	bb
A04	109.789	Block4640	aaxbb	aa	aa	aa	bb	bb	ab	ab	ab	ab	aa	bb	ab	ab	ab	ab	bb	aa	aa	bb	aa	bb	bb	ab	bb	ab	ab	ab	bb	ab	bb	ab	ab	bb	ab	ab	ab	aa	ab	aa	ab	ab	bb	bb	bb	ab	bb
A04	111.04	Block4645	aaxbb	aa	aa	aa	bb	bb	ab	ab	ab	ab	aa	bb	ab	bb	ab	ab	bb	aa	aa	bb	aa	bb	bb	ab	bb	ab	ab	ab	bb	ab	bb	ab	ab	bb	ab	ab	ab	aa	ab	aa	ab	ab	bb	bb	bb	ab	bb
A04	111.04	Block4646	aaxbb	aa	aa	aa	bb	bb	ab	ab	ab	ab	aa	bb	ab	bb	ab	ab	bb	aa	aa	bb	aa	bb	bb	ab	bb	ab	ab	ab	bb	ab	bb	ab	ab	bb	ab	ab	ab	aa	ab	aa	ab	ab	bb	bb	bb	ab	bb
A04	111.29	Block4647	aaxbb	aa	aa	aa	bb	bb	ab	ab	ab	ab	aa	bb	ab	bb	ab	ab	bb	aa	aa	bb	aa	bb	bb	ab	bb	ab	ab	ab	bb	ab	bb	ab	ab	bb	ab	ab	ab	aa	ab	aa	ab	ab	bb	bb	bb	ab	bb
A04	111.54	Block4648	aaxbb	aa	aa	aa	bb	bb	ab	ab	ab	ab	aa	bb	ab	bb	ab	ab	bb	aa	aa	bb	aa	bb	bb	ab	bb	ab	ab	ab	bb	ab	bb	ab	ab	bb	ab	ab	ab	aa	ab	aa	ab	ab	bb	bb	bb	ab	bb
A04	112.54	Block4651	aaxbb	aa	aa	aa	bb	bb	ab	ab	ab	ab	aa	bb	ab	bb	ab	ab	bb	aa	aa	bb	aa	bb	bb	ab	bb	ab	ab	ab	bb	ab	bb	ab	ab	bb	ab	ab	ab	aa	ab	aa	ab	ab	bb	bb	bb	ab	bb
A04	112.79	Block4652	aaxbb	aa	aa	aa	bb	bb	ab	ab	ab	ab	aa	bb	ab	bb	ab	ab	bb	aa	aa	bb	aa	bb	bb	ab	bb	ab	ab	ab	bb	ab	bb	ab	ab	bb	ab	ab	ab	aa	ab	aa	ab	ab	bb	bb	bb	ab	bb
A04	112.79	Block4654	aaxbb	aa	aa	aa	bb	bb	ab	ab	ab	ab	aa	bb	ab	bb	ab	ab	bb	aa	aa	bb	aa	bb	bb	ab	bb	ab	ab	ab	bb	ab	bb	ab	ab	bb	ab	ab	ab	aa	ab	aa	ab	ab	bb	bb	bb	ab	bb
A04	113.04	Block4665	aaxbb	aa	ab	aa	bb	bb	ab	ab	ab	ab	aa	bb	ab	bb	ab	ab	bb	aa	aa	bb	aa	bb	bb	ab	bb	ab	ab	ab	bb	ab	bb	ab	ab	bb	ab	ab	ab	aa	ab	aa	ab	ab	bb	bb	bb	ab	bb
A04	113.29	Block4672	aaxbb	aa	ab	aa	bb	bb	ab	ab	ab	ab	ab	bb	ab	bb	ab	ab	bb	aa	aa	bb	aa	bb	bb	ab	bb	ab	ab	ab	bb	ab	bb	ab	ab	bb	ab	ab	ab	aa	ab	aa	ab	ab	bb	bb	bb	ab	bb
A04	113.29	Block4676	aaxbb	aa	ab	aa	bb	bb	ab	ab	ab	ab	ab	bb	ab	bb	ab	ab	bb	aa	aa	bb	aa	bb	bb	ab	bb	ab	ab	ab	bb	ab	bb	ab	ab	bb	ab	ab	ab	aa	ab	aa	ab	ab	bb	bb	bb	ab	bb
A04	113.54	Block4670	aaxbb	aa	aa	aa	bb	bb	ab	ab	ab	ab	ab	bb	ab	bb	ab	ab	bb	aa	aa	bb	aa	bb	bb	ab	bb	ab	ab	ab	bb	ab	bb	ab	ab	bb	ab	ab	ab	aa	ab	aa	ab	ab	bb	bb	bb	ab	bb
A04	113.54	Block4671	aaxbb	aa	aa	aa	bb	bb	ab	ab	ab	ab	ab	bb	ab	bb	ab	ab	bb	aa	aa	bb	aa	bb	bb	ab	bb	ab	ab	ab	bb	ab	bb	ab	ab	bb	ab	ab	ab	aa	ab	aa	ab	ab	bb	bb	bb	ab	bb
A04	113.54	Block4675	aaxbb	aa	aa	aa	bb	bb	ab	ab	ab	ab	ab	bb	ab	bb	ab	ab	bb	aa	aa	bb	aa	bb	bb	ab	bb	ab	ab	ab	bb	ab	bb	ab	ab	bb	ab	ab	ab	aa	ab	aa	ab	ab	bb	bb	bb	ab	bb
A04	113.54	Block4668	aaxbb	aa	aa	aa	bb	bb	ab	ab	ab	ab	ab	bb	ab	bb	ab	ab	bb	aa	aa	bb	aa	bb	bb	ab	bb	ab	ab	ab	bb	ab	bb	ab	ab	bb	ab	ab	ab	aa	ab	aa	ab	ab	bb	bb	bb	ab	bb
A04	114.04	Block4679	aaxbb	aa	aa	aa	bb	bb	ab	ab	ab	ab	ab	bb	ab	bb	ab	ab	bb	aa	aa	bb	aa	bb	bb	ab	ab	ab	ab	ab	bb	ab	bb	ab	ab	bb	ab	ab	ab	aa	ab	aa	ab	ab	bb	bb	bb	ab	bb
A04	114.54	Block4683	aaxbb	aa	aa	aa	bb	bb	ab	ab	ab	ab	ab	bb	ab	bb	ab	ab	bb	aa	aa	bb	aa	bb	bb	ab	ab	ab	ab	ab	bb	ab	bb	ab	ab	bb	ab	ab	ab	aa	ab	aa	ab	ab	bb	bb	bb	ab	bb
A04	114.79	Block4682	aaxbb	aa	ab	aa	bb	bb	ab	ab	ab	ab	ab	bb	ab	bb	ab	ab	bb	aa	aa	bb	aa	bb	bb	ab	ab	ab	ab	ab	bb	ab	bb	ab	ab	bb	ab	ab	ab	aa	ab	aa	ab	ab	bb	bb	bb	ab	bb
A04	115.29	Block4688	aaxbb	aa	ab	aa	bb	bb	ab	ab	ab	ab	ab	bb	ab	bb	ab	ab	bb	aa	aa	bb	aa	bb	bb	ab	ab	ab	ab	ab	bb	ab	bb	ab	ab	ab	ab	ab	ab	aa	ab	aa	ab	ab	bb	bb	bb	ab	bb
A04	115.54	Block4689	aaxbb	aa	ab	aa	bb	bb	ab	ab	ab	ab	ab	bb	ab	bb	ab	ab	bb	aa	aa	bb	aa	bb	bb	ab	ab	ab	ab	ab	bb	ab	bb	ab	ab	ab	ab	ab	ab	aa	ab	aa	ab	ab	bb	bb	bb	ab	bb
A04	116.04	Block4691	aaxbb	aa	aa	aa	bb	bb	ab	ab	ab	ab	ab	bb	ab	bb	ab	ab	bb	aa	aa	bb	aa	bb	bb	ab	ab	ab	ab	ab	bb	ab	bb	ab	ab	bb	ab	ab	ab	aa	ab	aa	ab	ab	bb	bb	bb	ab	bb
A04	116.29	Block4694	aaxbb	aa	aa	aa	bb	bb	ab	ab	ab	ab	ab	bb	ab	bb	ab	ab	bb	aa	aa	bb	aa	bb	bb	ab	ab	ab	ab	ab	bb	ab	bb	ab	ab	bb	ab	ab	ab	aa	ab	aa	ab	ab	bb	bb	bb	ab	bb
A04	116.54	Block4695	aaxbb	aa	aa	aa	bb	bb	ab	ab	ab	ab	ab	bb	ab	bb	ab	ab	bb	aa	aa	bb	aa	bb	bb	ab	ab	ab	ab	ab	bb	ab	bb	ab	ab	bb	ab	ab	ab	aa	ab	aa	ab	ab	bb	bb	bb	ab	bb
A04	116.79	Block4696	aaxbb	aa	aa	aa	bb	bb	ab	ab	ab	ab	ab	bb	ab	bb	ab	ab	bb	aa	aa	bb	aa	bb	bb	ab	ab	ab	ab	ab	bb	ab	bb	ab	ab	bb	ab	ab	ab	aa	ab	aa	ab	ab	bb	bb	bb	ab	bb
A04	116.79	Block4697	aaxbb	aa	aa	aa	bb	bb	ab	ab	ab	ab	ab	bb	ab	bb	ab	ab	bb	aa	aa	bb	aa	bb	bb	ab	ab	ab	ab	ab	bb	ab	bb	ab	ab	bb	ab	ab	ab	aa	ab	aa	ab	ab	bb	bb	bb	ab	bb
A04	117.29	Block4702	aaxbb	aa	ab	aa	bb	bb	ab	ab	ab	ab	ab	bb	ab	bb	ab	ab	bb	aa	aa	bb	aa	bb	bb	ab	ab	ab	ab	ab	bb	ab	bb	ab	ab	ab	ab	ab	ab	aa	ab	aa	ab	ab	bb	bb	bb	ab	bb
A05	0	Block4883	aaxbb	aa	ab	ab	ab	aa	ab	ab	ab	ab	aa	ab	ab	ab	ab	ab	ab	ab	ab	ab	ab	aa	ab	ab	ab	ab	aa	ab	ab	ab	ab	ab	ab	ab	ab	ab	ab	ab	ab	ab	ab	aa	bb	ab	ab	ab	ab
A05	0	Block4886	aaxbb	aa	ab	ab	ab	aa	ab	ab	ab	ab	aa	ab	ab	ab	ab	ab	ab	ab	ab	ab	ab	aa	ab	ab	ab	ab	aa	ab	ab	ab	ab	ab	ab	ab	ab	ab	ab	ab	ab	ab	ab	aa	bb	ab	ab	ab	ab
A05	0	Block4872	aaxbb	aa	ab	ab	ab	aa	ab	ab	ab	ab	aa	ab	ab	ab	ab	ab	ab	ab	ab	ab	ab	aa	ab	ab	ab	ab	aa	ab	ab	ab	ab	ab	ab	ab	ab	ab	ab	ab	ab	ab	ab	aa	bb	ab	ab	ab	ab
A05	0	Block4875	aaxbb	aa	ab	ab	ab	aa	ab	ab	ab	ab	aa	ab	ab	ab	ab	ab	ab	ab	ab	ab	ab	aa	ab	ab	ab	ab	aa	ab	ab	ab	ab	ab	ab	ab	ab	ab	ab	ab	ab	ab	ab	aa	bb	ab	ab	ab	ab
A05	0	Block4870	aaxbb	aa	ab	ab	ab	aa	ab	ab	ab	ab	aa	ab	ab	ab	ab	ab	ab	ab	ab	ab	ab	aa	ab	ab	ab	ab	aa	ab	ab	ab	ab	ab	ab	ab	ab	ab	ab	ab	ab	ab	ab	aa	bb	ab	ab	ab	ab
A05	0	Block4869	aaxbb	aa	ab	ab	ab	aa	ab	ab	ab	ab	aa	ab	ab	ab	ab	ab	ab	ab	ab	ab	ab	aa	ab	ab	ab	ab	aa	ab	ab	ab	ab	ab	ab	ab	ab	ab	ab	ab	ab	ab	ab	aa	bb	ab	ab	ab	ab
A05	0	Block4868	aaxbb	aa	ab	ab	ab	aa	ab	ab	ab	ab	aa	ab	ab	ab	ab	ab	ab	ab	ab	ab	ab	aa	ab	ab	ab	ab	aa	ab	ab	ab	ab	ab	ab	ab	ab	ab	ab	ab	ab	ab	ab	aa	bb	ab	ab	ab	ab
A05	0	Block4865	aaxbb	aa	ab	ab	ab	aa	ab	ab	ab	ab	aa	ab	ab	ab	ab	ab	ab	ab	ab	ab	ab	aa	ab	ab	ab	ab	aa	ab	ab	ab	ab	ab	ab	ab	ab	ab	ab	ab	ab	ab	ab	aa	bb	ab	ab	ab	ab
A05	0	Block4864	aaxbb	aa	ab	ab	ab	aa	ab	ab	ab	ab	aa	ab	ab	ab	ab	ab	ab	ab	ab	ab	ab	aa	ab	ab	ab	ab	aa	ab	ab	ab	ab	ab	ab	ab	ab	ab	ab	ab	ab	ab	ab	aa	bb	ab	ab	ab	ab
A05	0	Block4863	aaxbb	aa	ab	ab	ab	aa	ab	ab	ab	ab	aa	ab	ab	ab	ab	ab	ab	ab	ab	ab	ab	aa	ab	ab	ab	ab	aa	ab	ab	ab	ab	ab	ab	ab	ab	ab	ab	ab	ab	ab	ab	aa	bb	ab	ab	ab	ab
A05	0	Block4843	aaxbb	aa	ab	ab	ab	aa	ab	ab	ab	ab	aa	ab	ab	ab	ab	ab	ab	ab	ab	ab	ab	aa	ab	ab	ab	ab	aa	ab	ab	ab	ab	ab	ab	ab	ab	ab	ab	ab	ab	ab	ab	aa	bb	ab	ab	ab	ab
A05	0	Block4842	aaxbb	aa	ab	ab	ab	aa	ab	ab	ab	ab	aa	ab	ab	ab	ab	ab	ab	ab	ab	ab	ab	aa	ab	ab	ab	ab	aa	ab	ab	ab	ab	ab	ab	ab	ab	ab	ab	ab	ab	ab	ab	aa	bb	ab	ab	ab	ab
A05	0	Block4841	aaxbb	aa	ab	ab	ab	aa	ab	ab	ab	ab	aa	ab	ab	ab	ab	ab	ab	ab	ab	ab	ab	aa	ab	ab	ab	ab	aa	ab	ab	ab	ab	ab	ab	ab	ab	ab	ab	ab	ab	ab	ab	aa	bb	ab	ab	ab	ab
A05	0	Block4846	aaxbb	aa	ab	ab	ab	aa	ab	ab	ab	ab	aa	ab	ab	ab	ab	ab	ab	ab	ab	ab	ab	aa	ab	ab	ab	ab	aa	ab	ab	ab	ab	ab	ab	ab	ab	ab	ab	ab	ab	ab	ab	aa	bb	ab	ab	ab	ab
A05	0	Block4844	aaxbb	aa	ab	ab	ab	aa	ab	ab	ab	ab	aa	ab	ab	ab	ab	ab	ab	ab	ab	ab	ab	aa	ab	ab	ab	ab	aa	ab	ab	ab	ab	ab	ab	ab	ab	ab	ab	ab	ab	ab	ab	aa	bb	ab	ab	ab	ab
A05	0	Block4845	aaxbb	aa	ab	ab	ab	aa	ab	ab	ab	ab	aa	ab	ab	ab	ab	ab	ab	ab	ab	ab	ab	aa	ab	ab	ab	ab	aa	ab	ab	ab	ab	ab	ab	ab	ab	ab	ab	ab	ab	ab	ab	aa	bb	ab	ab	ab	ab
A05	0	Block4847	aaxbb	aa	ab	ab	ab	aa	ab	ab	ab	ab	aa	ab	ab	ab	ab	ab	ab	ab	ab	ab	ab	aa	ab	ab	ab	ab	aa	ab	ab	ab	ab	ab	ab	ab	ab	ab	ab	ab	ab	ab	ab	aa	bb	ab	ab	ab	ab
A05	0	Block4848	aaxbb	aa	ab	ab	ab	aa	ab	ab	ab	ab	aa	ab	ab	ab	ab	ab	ab	ab	ab	ab	ab	aa	ab	ab	ab	ab	aa	ab	ab	ab	ab	ab	ab	ab	ab	ab	ab	ab	ab	ab	ab	aa	bb	ab	ab	ab	ab
A05	0	Block4849	aaxbb	aa	ab	ab	ab	aa	ab	ab	ab	ab	aa	ab	ab	ab	ab	ab	ab	ab	ab	ab	ab	aa	ab	ab	ab	ab	aa	ab	ab	ab	ab	ab	ab	ab	ab	ab	ab	ab	ab	ab	ab	aa	bb	ab	ab	ab	ab
A05	0	Block4850	aaxbb	aa	ab	ab	ab	aa	ab	ab	ab	ab	aa	ab	ab	ab	ab	ab	ab	ab	ab	ab	ab	aa	ab	ab	ab	ab	aa	ab	ab	ab	ab	ab	ab	ab	ab	ab	ab	ab	ab	ab	ab	aa	bb	ab	ab	ab	ab
A05	0	Block4857	aaxbb	aa	ab	ab	ab	aa	ab	ab	ab	ab	aa	ab	ab	ab	ab	ab	ab	ab	ab	ab	ab	aa	ab	ab	ab	ab	aa	ab	ab	ab	ab	ab	ab	ab	ab	ab	ab	ab	ab	ab	ab	aa	bb	ab	ab	ab	ab
A05	0	Block4859	aaxbb	aa	ab	ab	ab	aa	ab	ab	ab	ab	aa	ab	ab	ab	ab	ab	ab	ab	ab	ab	ab	aa	ab	ab	ab	ab	aa	ab	ab	ab	ab	ab	ab	ab	ab	ab	ab	ab	ab	ab	ab	aa	bb	ab	ab	ab	ab
A05	0	Block4854	aaxbb	aa	ab	ab	ab	aa	ab	ab	ab	ab	aa	ab	ab	ab	ab	ab	ab	ab	ab	ab	ab	aa	ab	ab	ab	ab	aa	ab	ab	ab	ab	ab	ab	ab	ab	ab	ab	ab	ab	ab	ab	aa	bb	ab	ab	ab	ab
A05	0	Block4852	aaxbb	aa	ab	ab	ab	aa	ab	ab	ab	ab	aa	ab	ab	ab	ab	ab	ab	ab	ab	ab	ab	aa	ab	ab	ab	ab	aa	ab	ab	ab	ab	ab	ab	ab	ab	ab	ab	ab	ab	ab	ab	aa	bb	ab	ab	ab	ab
A05	0	Block4855	aaxbb	aa	ab	ab	ab	aa	ab	ab	ab	ab	aa	ab	ab	ab	ab	ab	ab	ab	ab	ab	ab	aa	ab	ab	ab	ab	aa	ab	ab	ab	ab	ab	ab	ab	ab	ab	ab	ab	ab	ab	ab	aa	bb	ab	ab	ab	ab
A05	0	Block4856	aaxbb	aa	ab	ab	ab	aa	ab	ab	ab	ab	aa	ab	ab	ab	ab	ab	ab	ab	ab	ab	ab	aa	ab	ab	ab	ab	aa	ab	ab	ab	ab	ab	ab	ab	ab	ab	ab	ab	ab	ab	ab	aa	bb	ab	ab	ab	ab
A05	0	Block4851	aaxbb	aa	ab	ab	ab	aa	ab	ab	ab	ab	aa	ab	ab	ab	ab	ab	ab	ab	ab	ab	ab	aa	ab	ab	ab	ab	aa	ab	ab	ab	ab	ab	ab	ab	ab	ab	ab	ab	ab	ab	ab	aa	bb	ab	ab	ab	ab
A05	0	Block4853	aaxbb	aa	ab	ab	ab	aa	ab	ab	ab	ab	aa	ab	ab	ab	ab	ab	ab	ab	ab	ab	ab	aa	ab	ab	ab	ab	aa	ab	ab	ab	ab	ab	ab	ab	ab	ab	ab	ab	ab	ab	ab	aa	bb	ab	ab	ab	ab
A05	0	Block4860	aaxbb	aa	ab	ab	ab	aa	ab	ab	ab	ab	aa	ab	ab	ab	ab	ab	ab	ab	ab	ab	ab	aa	ab	ab	ab	ab	aa	ab	ab	ab	ab	ab	ab	ab	ab	ab	ab	ab	ab	ab	ab	aa	bb	ab	ab	ab	ab
A05	0	Block4858	aaxbb	aa	ab	ab	ab	aa	ab	ab	ab	ab	aa	ab	ab	ab	ab	ab	ab	ab	ab	ab	ab	aa	ab	ab	ab	ab	aa	ab	ab	ab	ab	ab	ab	ab	ab	ab	ab	ab	ab	ab	ab	aa	bb	ab	ab	ab	ab
A05	0	Block4861	aaxbb	aa	ab	ab	ab	aa	ab	ab	ab	ab	aa	ab	ab	ab	ab	ab	ab	ab	ab	ab	ab	aa	ab	ab	ab	ab	aa	ab	ab	ab	ab	ab	ab	ab	ab	ab	ab	ab	ab	ab	ab	aa	bb	ab	ab	ab	ab
A05	0	Block4862	aaxbb	aa	ab	ab	ab	aa	ab	ab	ab	ab	aa	ab	ab	ab	ab	ab	ab	ab	ab	ab	ab	aa	ab	ab	ab	ab	aa	ab	ab	ab	ab	ab	ab	ab	ab	ab	ab	ab	ab	ab	ab	aa	bb	ab	ab	ab	ab
A05	0	Block4867	aaxbb	aa	ab	ab	ab	aa	ab	ab	ab	ab	aa	ab	ab	ab	ab	ab	ab	ab	ab	ab	ab	aa	ab	ab	ab	ab	aa	ab	ab	ab	ab	ab	ab	ab	ab	ab	ab	ab	ab	ab	ab	aa	bb	ab	ab	ab	ab
A05	0	Block4866	aaxbb	aa	ab	ab	ab	aa	ab	ab	ab	ab	aa	ab	ab	ab	ab	ab	ab	ab	ab	ab	ab	aa	ab	ab	ab	ab	aa	ab	ab	ab	ab	ab	ab	ab	ab	ab	ab	ab	ab	ab	ab	aa	bb	ab	ab	ab	ab
A05	0	Block4871	aaxbb	aa	ab	ab	ab	aa	ab	ab	ab	ab	aa	ab	ab	ab	ab	ab	ab	ab	ab	ab	ab	aa	ab	ab	ab	ab	aa	ab	ab	ab	ab	ab	ab	ab	ab	ab	ab	ab	ab	ab	ab	aa	bb	ab	ab	ab	ab
A05	0	Block4874	aaxbb	aa	ab	ab	ab	aa	ab	ab	ab	ab	aa	ab	ab	ab	ab	ab	ab	ab	ab	ab	ab	aa	ab	ab	ab	ab	aa	ab	ab	ab	ab	ab	ab	ab	ab	ab	ab	ab	ab	ab	ab	aa	bb	ab	ab	ab	ab
A05	0	Block4876	aaxbb	aa	ab	ab	ab	aa	ab	ab	ab	ab	aa	ab	ab	ab	ab	ab	ab	ab	ab	ab	ab	aa	ab	ab	ab	ab	aa	ab	ab	ab	ab	ab	ab	ab	ab	ab	ab	ab	ab	ab	ab	aa	bb	ab	ab	ab	ab
A05	0	Block4873	aaxbb	aa	ab	ab	ab	aa	ab	ab	ab	ab	aa	ab	ab	ab	ab	ab	ab	ab	ab	ab	ab	aa	ab	ab	ab	ab	aa	ab	ab	ab	ab	ab	ab	ab	ab	ab	ab	ab	ab	ab	ab	aa	bb	ab	ab	ab	ab
A05	0	Block4878	aaxbb	aa	ab	ab	ab	aa	ab	ab	ab	ab	aa	ab	ab	ab	ab	ab	ab	ab	ab	ab	ab	aa	ab	ab	ab	ab	aa	ab	ab	ab	ab	ab	ab	ab	ab	ab	ab	ab	ab	ab	ab	aa	bb	ab	ab	ab	ab
A05	0	Block4885	aaxbb	aa	ab	ab	ab	aa	ab	ab	ab	ab	aa	ab	ab	ab	ab	ab	ab	ab	ab	ab	ab	aa	ab	ab	ab	ab	aa	ab	ab	ab	ab	ab	ab	ab	ab	ab	ab	ab	ab	ab	ab	aa	bb	ab	ab	ab	ab
A05	0.351	Block4879	aaxbb	aa	ab	ab	ab	aa	ab	ab	ab	ab	aa	ab	ab	ab	ab	ab	ab	ab	ab	ab	ab	aa	ab	ab	ab	ab	aa	ab	ab	ab	ab	ab	ab	ab	ab	ab	ab	ab	ab	ab	ab	aa	bb	ab	ab	ab	ab
A05	1.952	Block4877	aaxbb	ab	ab	ab	ab	aa	ab	ab	ab	ab	ab	ab	ab	ab	ab	ab	ab	ab	ab	ab	ab	aa	ab	ab	ab	ab	ab	ab	ab	ab	ab	ab	ab	ab	ab	ab	ab	ab	ab	ab	ab	ab	bb	ab	ab	ab	ab
A05	3.002	Block4884	aaxbb	ab	ab	ab	ab	aa	ab	ab	ab	ab	ab	ab	ab	ab	ab	ab	ab	ab	ab	ab	ab	aa	ab	ab	ab	ab	ab	ab	ab	ab	ab	ab	ab	ab	ab	ab	ab	ab	ab	ab	ab	ab	bb	ab	ab	ab	ab
A05	3.252	Block4881	aaxbb	ab	ab	ab	ab	ab	ab	ab	ab	ab	ab	ab	ab	ab	ab	ab	ab	ab	ab	ab	ab	aa	ab	ab	ab	ab	ab	ab	ab	ab	ab	ab	ab	ab	ab	ab	ab	ab	ab	ab	ab	ab	bb	ab	ab	ab	ab
A05	4.352	Block4880	aaxbb	ab	ab	ab	ab	ab	ab	ab	ab	ab	ab	ab	ab	ab	ab	ab	ab	ab	ab	ab	ab	aa	ab	ab	ab	ab	ab	ab	ab	ab	ab	ab	ab	ab	ab	ab	ab	ab	ab	ab	ab	ab	bb	ab	ab	ab	ab
A05	4.602	Block5002	aaxbb	ab	ab	ab	ab	ab	ab	ab	ab	ab	ab	ab	ab	ab	ab	ab	ab	ab	ab	ab	ab	aa	ab	ab	ab	ab	ab	ab	ab	ab	ab	ab	ab	ab	ab	ab	ab	ab	ab	ab	ab	ab	bb	ab	ab	ab	ab
A05	5.107	Block4890	aaxbb	ab	ab	ab	ab	ab	ab	ab	ab	ab	ab	ab	ab	ab	ab	ab	ab	ab	ab	ab	ab	aa	ab	ab	ab	ab	ab	ab	ab	ab	ab	ab	ab	ab	ab	ab	ab	ab	ab	ab	ab	ab	bb	ab	ab	ab	ab
A05	5.759	Block4882	aaxbb	ab	ab	ab	ab	ab	ab	ab	ab	ab	ab	ab	ab	ab	ab	ab	ab	ab	ab	ab	ab	aa	ab	ab	ab	ab	ab	ab	ab	ab	ab	ab	ab	ab	ab	ab	ab	ab	ab	ab	ab	ab	bb	ab	ab	ab	ab
A05	9.365	Block4895	aaxbb	ab	ab	ab	ab	ab	ab	ab	ab	ab	ab	ab	ab	bb	ab	ab	ab	ab	ab	ab	ab	aa	ab	ab	ab	ab	ab	ab	bb	ab	ab	ab	ab	ab	ab	ab	ab	ab	ab	ab	ab	ab	bb	ab	ab	ab	ab
A05	9.615	Block4892	aaxbb	ab	ab	ab	ab	ab	ab	ab	ab	ab	ab	ab	ab	bb	ab	ab	ab	ab	ab	ab	ab	aa	ab	ab	ab	ab	ab	ab	bb	ab	ab	ab	ab	ab	ab	ab	ab	ab	ab	ab	ab	ab	bb	ab	ab	ab	ab
A05	9.615	Block4918	aaxbb	ab	ab	ab	ab	ab	ab	ab	ab	ab	ab	ab	ab	bb	ab	ab	ab	ab	ab	ab	ab	aa	ab	ab	ab	ab	ab	ab	bb	ab	ab	ab	ab	ab	ab	ab	ab	ab	ab	ab	ab	ab	bb	ab	ab	ab	ab
A05	9.865	Block4887	aaxbb	ab	ab	ab	ab	ab	ab	ab	ab	ab	ab	ab	ab	bb	ab	ab	ab	ab	ab	ab	ab	aa	ab	ab	ab	ab	ab	ab	bb	ab	ab	ab	ab	ab	ab	ab	ab	ab	ab	ab	ab	ab	bb	ab	ab	ab	ab
A05	14.882	Block4953	aaxbb	ab	ab	ab	ab	ab	bb	ab	ab	ab	ab	bb	ab	bb	ab	ab	ab	ab	ab	bb	ab	aa	ab	ab	ab	ab	ab	bb	bb	ab	ab	ab	ab	ab	ab	ab	ab	ab	ab	bb	bb	ab	bb	bb	ab	ab	ab
A05	15.432	Block4893	aaxbb	ab	ab	ab	ab	ab	bb	ab	ab	ab	ab	bb	ab	bb	ab	aa	ab	ab	ab	bb	ab	aa	ab	ab	ab	ab	ab	bb	bb	ab	ab	ab	ab	ab	ab	bb	ab	ab	ab	bb	bb	ab	bb	bb	ab	ab	ab
A05	16.033	Block4959	aaxbb	ab	ab	ab	ab	ab	bb	ab	ab	ab	ab	bb	ab	bb	ab	aa	ab	ab	ab	bb	ab	aa	ab	ab	ab	ab	ab	bb	bb	ab	ab	ab	ab	ab	ab	bb	ab	ab	ab	bb	bb	ab	bb	bb	ab	ab	ab
A05	18.736	Block4960	aaxbb	ab	ab	ab	ab	ab	bb	ab	ab	ab	ab	bb	ab	bb	ab	aa	ab	ab	ab	bb	ab	aa	ab	ab	ab	ab	ab	bb	bb	aa	ab	ab	ab	ab	ab	bb	aa	ab	ab	bb	bb	ab	ab	bb	ab	ab	ab
A05	20.137	Block4952	aaxbb	ab	ab	ab	ab	ab	bb	ab	ab	aa	ab	bb	ab	bb	ab	aa	ab	ab	ab	bb	ab	aa	ab	ab	ab	ab	ab	bb	bb	aa	ab	ab	ab	ab	ab	bb	aa	ab	ab	bb	bb	ab	ab	bb	ab	ab	aa
A05	24.015	Block4891	aaxbb	ab	ab	ab	ab	ab	bb	ab	ab	aa	ab	bb	ab	bb	ab	aa	ab	ab	aa	bb	ab	aa	ab	ab	ab	ab	ab	bb	bb	aa	ab	ab	ab	ab	ab	bb	aa	ab	ab	bb	bb	ab	ab	bb	ab	ab	aa
A05	25.036	Block4944	aaxbb	ab	ab	ab	ab	ab	bb	ab	ab	aa	ab	bb	ab	bb	ab	aa	ab	ab	aa	bb	ab	aa	ab	ab	ab	ab	ab	bb	bb	aa	ab	ab	ab	ab	ab	bb	aa	ab	ab	bb	bb	ab	ab	bb	ab	ab	aa
A05	26.336	Block4945	aaxbb	ab	ab	ab	ab	ab	bb	ab	ab	aa	ab	bb	ab	bb	ab	aa	ab	ab	aa	bb	ab	aa	ab	ab	ab	ab	ab	bb	bb	aa	ab	ab	ab	ab	ab	bb	aa	ab	ab	bb	bb	ab	ab	bb	ab	ab	aa
A05	26.336	Block4948	aaxbb	ab	ab	ab	ab	ab	bb	ab	ab	aa	ab	bb	ab	bb	ab	aa	ab	ab	aa	bb	ab	aa	ab	ab	ab	ab	ab	bb	bb	aa	ab	ab	ab	ab	ab	bb	aa	ab	ab	bb	bb	ab	ab	bb	ab	ab	aa
A05	26.336	Block4951	aaxbb	ab	ab	ab	ab	ab	bb	ab	ab	aa	ab	bb	ab	bb	ab	aa	ab	ab	aa	bb	ab	aa	ab	ab	ab	ab	ab	bb	bb	aa	ab	ab	ab	ab	ab	bb	aa	ab	ab	bb	bb	ab	ab	bb	ab	ab	aa
A05	26.336	Block4939	aaxbb	ab	ab	ab	ab	ab	bb	ab	ab	aa	ab	bb	ab	bb	ab	aa	ab	ab	aa	bb	ab	aa	ab	ab	ab	ab	ab	bb	bb	aa	ab	ab	ab	ab	ab	bb	aa	ab	ab	bb	bb	ab	ab	bb	ab	ab	aa
A05	26.588	Block4964	aaxbb	ab	ab	ab	ab	ab	bb	ab	ab	aa	ab	bb	ab	bb	ab	aa	ab	ab	aa	bb	ab	aa	ab	ab	ab	ab	ab	bb	bb	aa	ab	ab	ab	ab	ab	aa	aa	ab	ab	bb	bb	ab	ab	bb	ab	ab	aa
A05	27.87	Block4942	aaxbb	ab	ab	ab	ab	ab	bb	ab	ab	aa	ab	bb	ab	aa	ab	aa	ab	ab	aa	bb	ab	aa	ab	ab	ab	ab	ab	bb	bb	aa	ab	ab	ab	ab	ab	aa	aa	ab	ab	bb	bb	ab	ab	bb	ab	ab	aa
A05	28.121	Block4966	aaxbb	ab	ab	ab	ab	ab	bb	ab	ab	aa	ab	bb	ab	aa	ab	aa	ab	ab	aa	bb	ab	aa	ab	ab	ab	ab	ab	bb	bb	aa	ab	ab	ab	ab	ab	aa	aa	ab	ab	bb	bb	ab	ab	bb	ab	ab	aa
A05	29.403	Block4950	aaxbb	ab	ab	ab	ab	ab	bb	ab	ab	aa	ab	bb	ab	aa	ab	aa	ab	ab	aa	bb	ab	aa	ab	ab	ab	ab	aa	bb	aa	aa	ab	ab	ab	ab	ab	aa	aa	ab	ab	bb	bb	ab	ab	bb	ab	ab	aa
A05	32.558	Block4967	aaxbb	aa	ab	ab	ab	ab	bb	ab	ab	aa	ab	bb	aa	aa	ab	aa	ab	aa	aa	bb	ab	aa	ab	ab	ab	ab	aa	bb	aa	aa	ab	ab	ab	ab	ab	aa	aa	aa	ab	bb	bb	ab	ab	bb	ab	ab	aa
A05	37.322	Block4975	aaxbb	aa	ab	ab	ab	ab	bb	ab	ab	aa	ab	bb	aa	aa	ab	aa	ab	aa	aa	bb	ab	aa	ab	ab	ab	ab	aa	bb	aa	aa	ab	ab	ab	ab	aa	aa	aa	aa	ab	ab	ab	ab	ab	bb	ab	ab	aa
A05	42.895	Block4978	aaxbb	aa	ab	ab	ab	ab	bb	ab	ab	aa	ab	bb	aa	aa	ab	aa	ab	aa	aa	bb	ab	aa	ab	ab	ab	ab	aa	bb	aa	aa	ab	ab	ab	ab	aa	aa	aa	aa	ab	ab	ab	ab	ab	bb	ab	aa	aa
A05	46.501	Block4973	aaxbb	aa	ab	aa	ab	ab	ab	ab	ab	aa	ab	ab	aa	aa	ab	aa	ab	aa	aa	bb	ab	aa	ab	ab	ab	bb	aa	bb	aa	aa	ab	ab	ab	ab	aa	aa	aa	aa	ab	ab	ab	ab	ab	ab	ab	aa	aa
A05	47.501	Block4968	aaxbb	aa	ab	aa	ab	ab	ab	ab	ab	aa	ab	ab	aa	aa	ab	aa	ab	aa	aa	bb	bb	aa	ab	ab	ab	bb	aa	bb	aa	aa	ab	ab	ab	ab	aa	aa	aa	aa	ab	ab	ab	ab	ab	ab	ab	aa	aa
A05	47.501	Block4937	aaxbb	aa	ab	aa	ab	ab	ab	ab	ab	aa	ab	ab	aa	aa	ab	aa	ab	aa	aa	bb	bb	aa	ab	ab	ab	bb	aa	bb	aa	aa	ab	ab	ab	ab	aa	aa	aa	aa	ab	ab	ab	ab	ab	ab	ab	aa	aa
A05	47.501	Block4974	aaxbb	aa	ab	aa	ab	ab	ab	ab	ab	aa	ab	ab	aa	aa	ab	aa	ab	aa	aa	bb	bb	aa	ab	ab	ab	bb	aa	bb	aa	aa	ab	ab	ab	ab	aa	aa	aa	aa	ab	ab	ab	ab	ab	ab	ab	aa	aa
A05	47.501	Block4946	aaxbb	aa	ab	aa	ab	ab	ab	ab	ab	aa	ab	ab	aa	aa	ab	aa	ab	aa	aa	bb	bb	aa	ab	ab	ab	bb	aa	bb	aa	aa	ab	ab	ab	ab	aa	aa	aa	aa	ab	ab	ab	ab	ab	ab	ab	aa	aa
A05	47.501	Block4972	aaxbb	aa	ab	aa	ab	ab	ab	ab	ab	aa	ab	ab	aa	aa	ab	aa	ab	aa	aa	bb	bb	aa	ab	ab	ab	bb	aa	bb	aa	aa	ab	ab	ab	ab	aa	aa	aa	aa	ab	ab	ab	ab	ab	ab	ab	aa	aa
A05	47.501	Block4969	aaxbb	aa	ab	aa	ab	ab	ab	ab	ab	aa	ab	ab	aa	aa	ab	aa	ab	aa	aa	bb	bb	aa	ab	ab	ab	bb	aa	bb	aa	aa	ab	ab	ab	ab	aa	aa	aa	aa	ab	ab	ab	ab	ab	ab	ab	aa	aa
A05	47.501	Block4949	aaxbb	aa	ab	aa	ab	ab	ab	ab	ab	aa	ab	ab	aa	aa	ab	aa	ab	aa	aa	bb	bb	aa	ab	ab	ab	bb	aa	bb	aa	aa	ab	ab	ab	ab	aa	aa	aa	aa	ab	ab	ab	ab	ab	ab	ab	aa	aa
A05	47.751	Block4979	aaxbb	aa	ab	aa	ab	ab	ab	ab	ab	aa	ab	ab	aa	aa	ab	aa	ab	aa	aa	bb	bb	aa	ab	ab	ab	bb	aa	bb	aa	aa	ab	ab	ab	ab	aa	aa	aa	aa	ab	ab	ab	ab	ab	ab	ab	aa	aa
A05	47.751	Block4965	aaxbb	aa	ab	aa	ab	ab	ab	ab	ab	aa	ab	ab	aa	aa	ab	aa	ab	aa	aa	bb	bb	aa	ab	ab	ab	bb	aa	bb	aa	aa	ab	ab	ab	ab	aa	aa	aa	aa	ab	ab	ab	ab	ab	ab	ab	aa	aa
A05	47.751	Block4943	aaxbb	aa	ab	aa	ab	ab	ab	ab	ab	aa	ab	ab	aa	aa	ab	aa	ab	aa	aa	bb	bb	aa	ab	ab	ab	bb	aa	bb	aa	aa	ab	ab	ab	ab	aa	aa	aa	aa	ab	ab	ab	ab	ab	ab	ab	aa	aa
A05	47.751	Block4971	aaxbb	aa	ab	aa	ab	ab	ab	ab	ab	aa	ab	ab	aa	aa	ab	aa	ab	aa	aa	bb	bb	aa	ab	ab	ab	bb	aa	bb	aa	aa	ab	ab	ab	ab	aa	aa	aa	aa	ab	ab	ab	ab	ab	ab	ab	aa	aa
A05	48.001	Block4987	aaxbb	aa	ab	aa	ab	ab	ab	ab	ab	aa	ab	ab	aa	aa	ab	aa	ab	aa	aa	bb	bb	aa	ab	ab	ab	bb	aa	bb	aa	aa	ab	ab	ab	ab	aa	aa	aa	aa	ab	ab	ab	ab	ab	ab	ab	aa	aa
A05	48.251	Block4988	aaxbb	aa	ab	aa	ab	ab	ab	ab	ab	aa	ab	ab	aa	aa	ab	aa	ab	aa	aa	bb	bb	aa	ab	ab	ab	bb	aa	bb	aa	aa	ab	ab	ab	ab	aa	aa	aa	aa	ab	ab	ab	ab	ab	ab	ab	aa	aa
A05	48.751	Block4989	aaxbb	aa	ab	aa	ab	ab	ab	ab	ab	aa	ab	ab	aa	aa	ab	aa	ab	aa	aa	bb	bb	aa	ab	ab	ab	bb	aa	bb	aa	aa	ab	ab	ab	ab	aa	aa	aa	aa	ab	ab	ab	ab	ab	ab	ab	aa	aa
A05	49.501	Block4990	aaxbb	aa	ab	aa	ab	ab	ab	ab	ab	aa	ab	ab	aa	aa	ab	aa	ab	aa	aa	bb	bb	aa	ab	ab	ab	bb	aa	bb	aa	aa	ab	ab	ab	ab	aa	aa	aa	aa	ab	ab	ab	ab	ab	ab	ab	aa	aa
A05	50.502	Block4991	aaxbb	aa	ab	aa	ab	ab	ab	ab	ab	aa	ab	ab	aa	aa	ab	aa	ab	aa	aa	bb	bb	aa	ab	ab	ab	bb	aa	bb	aa	aa	ab	ab	ab	ab	aa	aa	aa	aa	ab	ab	ab	ab	ab	ab	ab	aa	aa
A05	50.502	Block4977	aaxbb	aa	ab	aa	ab	ab	ab	ab	ab	aa	ab	ab	aa	aa	ab	aa	ab	aa	aa	bb	bb	aa	ab	ab	ab	bb	aa	bb	aa	aa	ab	ab	ab	ab	aa	aa	aa	aa	ab	ab	ab	ab	ab	ab	ab	aa	aa
A05	51.252	Block4993	aaxbb	aa	ab	aa	ab	ab	ab	ab	ab	aa	ab	ab	aa	aa	ab	aa	ab	aa	aa	bb	bb	aa	ab	ab	ab	bb	aa	bb	aa	aa	ab	ab	ab	ab	aa	aa	aa	aa	ab	ab	ab	ab	ab	ab	ab	aa	aa
A05	52.252	Block4976	aaxbb	aa	ab	aa	ab	ab	ab	ab	ab	aa	ab	ab	aa	aa	ab	aa	ab	aa	aa	bb	bb	aa	ab	ab	ab	bb	aa	bb	aa	aa	ab	ab	ab	ab	aa	aa	aa	aa	ab	ab	ab	ab	aa	ab	ab	aa	aa
A05	53.252	Block4994	aaxbb	aa	ab	aa	ab	ab	ab	ab	ab	aa	ab	ab	aa	aa	ab	aa	ab	aa	aa	bb	bb	aa	ab	ab	ab	bb	aa	bb	aa	aa	ab	ab	ab	ab	aa	aa	aa	aa	ab	ab	ab	ab	aa	ab	aa	aa	aa
A05	54.252	Block5003	aaxbb	aa	ab	aa	ab	ab	ab	ab	ab	aa	ab	ab	aa	aa	ab	aa	ab	aa	aa	bb	bb	aa	ab	ab	ab	bb	aa	bb	aa	aa	aa	ab	ab	ab	aa	aa	aa	aa	ab	ab	ab	ab	aa	ab	aa	aa	aa
A05	55.252	Block4961	aaxbb	aa	ab	aa	ab	ab	ab	ab	ab	aa	ab	ab	aa	aa	ab	aa	ab	aa	aa	bb	bb	aa	ab	ab	ab	bb	aa	bb	aa	aa	aa	ab	aa	aa	aa	aa	aa	aa	ab	ab	ab	ab	aa	ab	aa	aa	aa
A05	62.4	Block4995	aaxbb	aa	ab	aa	ab	ab	ab	ab	ab	aa	ab	ab	aa	aa	ab	aa	ab	aa	aa	bb	bb	aa	ab	ab	ab	bb	aa	bb	aa	aa	aa	aa	aa	aa	ab	aa	aa	aa	aa	ab	ab	ab	aa	ab	aa	aa	aa
A05	62.4	Block5004	aaxbb	aa	ab	aa	ab	ab	ab	ab	ab	aa	ab	ab	aa	aa	ab	aa	ab	aa	aa	bb	bb	aa	ab	ab	ab	bb	aa	bb	aa	aa	aa	aa	aa	aa	ab	aa	aa	aa	aa	ab	ab	ab	aa	ab	aa	aa	aa
A05	62.4	Block5001	aaxbb	aa	ab	aa	ab	ab	ab	ab	ab	aa	ab	ab	aa	aa	ab	aa	ab	aa	aa	bb	bb	aa	ab	ab	ab	bb	aa	bb	aa	aa	aa	aa	aa	aa	ab	aa	aa	aa	aa	ab	ab	ab	aa	ab	aa	aa	aa
A05	62.4	Block4992	aaxbb	aa	ab	aa	ab	ab	ab	ab	ab	aa	ab	ab	aa	aa	ab	aa	ab	aa	aa	bb	bb	aa	ab	ab	ab	bb	aa	bb	aa	aa	aa	aa	aa	aa	ab	aa	aa	aa	aa	ab	ab	ab	aa	ab	aa	aa	aa
A05	62.65	Block5054	aaxbb	aa	ab	aa	ab	ab	ab	ab	ab	aa	ab	ab	aa	aa	ab	aa	ab	aa	aa	bb	bb	aa	ab	aa	ab	bb	aa	bb	aa	aa	aa	aa	aa	aa	ab	aa	aa	aa	aa	ab	ab	ab	aa	ab	aa	aa	aa
A05	62.65	Block5005	aaxbb	aa	ab	aa	ab	ab	ab	ab	ab	aa	ab	ab	aa	aa	ab	aa	ab	aa	aa	bb	bb	aa	ab	aa	ab	bb	aa	bb	aa	aa	aa	aa	aa	aa	ab	aa	aa	aa	aa	ab	ab	ab	aa	ab	aa	aa	aa
A05	63.4	Block5057	aaxbb	aa	ab	aa	ab	ab	ab	ab	ab	aa	ab	ab	aa	aa	ab	aa	ab	aa	aa	bb	bb	aa	ab	aa	ab	bb	aa	bb	aa	aa	aa	aa	aa	aa	ab	aa	aa	aa	aa	ab	ab	aa	aa	ab	aa	aa	aa
A05	64.151	Block5055	aaxbb	aa	ab	aa	ab	ab	bb	ab	ab	aa	ab	ab	aa	aa	ab	aa	ab	aa	aa	bb	bb	aa	ab	aa	ab	bb	aa	bb	aa	aa	aa	aa	aa	aa	ab	aa	aa	aa	aa	ab	ab	aa	aa	ab	aa	aa	aa
A05	64.651	Block5061	aaxbb	aa	ab	aa	ab	ab	bb	ab	ab	aa	ab	ab	aa	aa	ab	aa	ab	aa	aa	bb	bb	aa	ab	aa	ab	bb	aa	bb	aa	aa	aa	aa	aa	aa	ab	aa	aa	aa	aa	ab	ab	aa	aa	ab	aa	aa	aa
A05	64.901	Block5063	aaxbb	aa	ab	aa	ab	ab	bb	ab	ab	aa	ab	ab	aa	aa	ab	aa	ab	aa	aa	bb	bb	aa	ab	aa	ab	bb	aa	bb	aa	aa	aa	aa	aa	aa	ab	aa	aa	aa	aa	ab	ab	aa	aa	ab	aa	aa	aa
A05	65.151	Block5069	aaxbb	aa	ab	aa	ab	ab	bb	ab	ab	aa	ab	ab	aa	aa	ab	aa	ab	aa	aa	bb	bb	aa	ab	aa	ab	bb	aa	bb	aa	aa	aa	aa	aa	aa	ab	aa	aa	aa	aa	ab	ab	aa	aa	ab	aa	aa	aa
A05	65.651	Block5074	aaxbb	aa	ab	aa	ab	ab	bb	ab	ab	aa	ab	ab	aa	aa	ab	aa	ab	aa	aa	bb	bb	aa	ab	aa	ab	bb	aa	bb	aa	aa	aa	aa	aa	aa	ab	aa	aa	aa	aa	ab	ab	aa	aa	ab	aa	aa	aa
A05	66.151	Block5075	aaxbb	aa	ab	aa	ab	ab	bb	ab	ab	aa	ab	ab	aa	aa	ab	aa	ab	aa	aa	bb	bb	aa	ab	aa	ab	bb	aa	bb	aa	aa	aa	aa	aa	aa	ab	aa	aa	aa	aa	ab	ab	aa	aa	ab	aa	aa	aa
A05	66.651	Block5076	aaxbb	aa	ab	aa	ab	ab	bb	ab	ab	aa	ab	ab	aa	aa	ab	aa	ab	aa	aa	bb	bb	aa	ab	aa	ab	bb	aa	bb	aa	aa	aa	aa	aa	aa	ab	aa	aa	aa	aa	ab	ab	aa	aa	aa	aa	aa	aa
A05	66.901	Block5077	aaxbb	aa	ab	aa	ab	ab	bb	ab	ab	aa	ab	ab	aa	aa	ab	aa	ab	aa	aa	bb	bb	aa	ab	aa	ab	bb	aa	bb	aa	aa	aa	aa	aa	aa	ab	aa	aa	aa	aa	ab	ab	aa	aa	aa	aa	aa	aa
A05	67.401	Block5078	aaxbb	aa	ab	aa	ab	ab	bb	ab	ab	aa	ab	ab	aa	aa	ab	aa	ab	aa	aa	bb	bb	aa	ab	aa	ab	bb	aa	bb	aa	aa	aa	aa	aa	aa	ab	aa	aa	aa	aa	ab	ab	aa	aa	aa	aa	aa	aa
A05	69.101	Block5079	aaxbb	aa	ab	aa	ab	ab	bb	ab	ab	aa	ab	ab	aa	aa	ab	aa	ab	aa	aa	bb	bb	aa	ab	aa	ab	bb	aa	bb	aa	aa	aa	aa	aa	aa	ab	aa	aa	aa	aa	ab	aa	aa	aa	aa	aa	aa	aa
A05	70.552	Block5081	aaxbb	aa	ab	aa	ab	ab	bb	ab	ab	aa	ab	ab	aa	aa	ab	aa	ab	aa	aa	bb	bb	aa	ab	aa	ab	bb	aa	bb	aa	aa	aa	aa	aa	aa	ab	aa	aa	aa	aa	ab	aa	aa	aa	aa	aa	aa	aa
A05	72.503	Block5080	aaxbb	aa	ab	aa	ab	ab	bb	ab	ab	aa	ab	ab	aa	aa	ab	aa	ab	aa	aa	bb	bb	aa	ab	aa	ab	bb	aa	bb	aa	aa	aa	aa	aa	aa	ab	aa	aa	aa	aa	ab	aa	aa	aa	aa	aa	aa	aa
A05	74.203	Block5083	aaxbb	aa	ab	aa	ab	ab	bb	ab	ab	aa	ab	ab	aa	aa	ab	aa	ab	aa	aa	bb	bb	aa	ab	aa	ab	bb	aa	bb	aa	aa	aa	aa	aa	aa	ab	aa	aa	aa	aa	ab	aa	aa	aa	aa	aa	aa	aa
A05	74.703	Block5082	aaxbb	aa	ab	aa	ab	ab	bb	ab	ab	aa	ab	ab	aa	aa	ab	aa	ab	aa	aa	bb	bb	aa	ab	aa	ab	bb	aa	bb	aa	aa	aa	aa	aa	aa	ab	aa	aa	aa	aa	ab	aa	aa	aa	aa	aa	aa	aa
A05	74.953	Block5086	aaxbb	aa	ab	aa	ab	ab	bb	ab	ab	aa	ab	ab	aa	aa	ab	aa	ab	aa	aa	bb	ab	aa	ab	aa	ab	bb	aa	bb	aa	aa	aa	aa	aa	aa	ab	aa	aa	aa	aa	ab	aa	aa	aa	aa	aa	aa	aa
A05	74.953	Block5085	aaxbb	aa	ab	aa	ab	ab	bb	ab	ab	aa	ab	ab	aa	aa	ab	aa	ab	aa	aa	bb	ab	aa	ab	aa	ab	bb	aa	bb	aa	aa	aa	aa	aa	aa	ab	aa	aa	aa	aa	ab	aa	aa	aa	aa	aa	aa	aa
A05	75.203	Block5087	aaxbb	aa	ab	aa	ab	ab	bb	ab	ab	aa	ab	ab	aa	aa	ab	aa	ab	aa	aa	bb	ab	aa	ab	aa	ab	bb	aa	bb	aa	aa	aa	aa	aa	aa	ab	aa	aa	aa	aa	ab	aa	aa	aa	aa	aa	aa	aa
A05	75.703	Block5089	aaxbb	aa	ab	aa	ab	ab	bb	ab	ab	aa	ab	aa	aa	aa	aa	aa	ab	aa	aa	bb	ab	aa	ab	aa	ab	bb	aa	bb	aa	aa	aa	aa	aa	aa	ab	aa	aa	aa	aa	ab	aa	aa	aa	aa	aa	aa	aa
A05	75.703	Block5084	aaxbb	aa	ab	aa	ab	ab	bb	ab	ab	aa	ab	aa	aa	aa	aa	aa	ab	aa	aa	bb	ab	aa	ab	aa	ab	bb	aa	bb	aa	aa	aa	aa	aa	aa	ab	aa	aa	aa	aa	ab	aa	aa	aa	aa	aa	aa	aa
A05	75.953	Block5091	aaxbb	aa	ab	aa	ab	ab	bb	ab	ab	aa	ab	aa	aa	aa	aa	aa	ab	aa	aa	bb	ab	aa	ab	aa	ab	bb	aa	bb	aa	aa	aa	aa	aa	aa	ab	aa	aa	aa	aa	ab	aa	aa	aa	aa	aa	aa	aa
A05	76.205	Block5090	aaxbb	aa	ab	aa	ab	ab	bb	ab	ab	aa	ab	aa	aa	aa	aa	aa	ab	aa	aa	bb	ab	aa	ab	aa	ab	aa	aa	bb	aa	aa	aa	aa	aa	aa	ab	aa	aa	aa	aa	ab	aa	aa	aa	aa	aa	aa	aa
A05	76.71	Block5094	aaxbb	aa	ab	aa	ab	ab	bb	ab	ab	aa	ab	aa	aa	aa	aa	aa	ab	aa	aa	aa	ab	aa	ab	aa	ab	aa	aa	aa	aa	aa	aa	aa	aa	aa	ab	aa	aa	aa	aa	ab	aa	aa	aa	aa	aa	aa	aa
A05	77.21	Block5093	aaxbb	aa	ab	aa	ab	ab	bb	ab	ab	aa	ab	aa	aa	aa	aa	aa	ab	aa	aa	aa	ab	aa	ab	aa	ab	aa	aa	aa	aa	aa	aa	aa	aa	aa	ab	aa	aa	aa	aa	ab	aa	aa	aa	aa	aa	aa	aa
A05	78.66	Block5096	aaxbb	aa	ab	aa	ab	ab	bb	ab	aa	aa	ab	aa	aa	aa	aa	aa	ab	aa	aa	aa	ab	aa	ab	aa	ab	aa	aa	aa	aa	aa	aa	aa	aa	aa	ab	aa	aa	aa	aa	ab	aa	aa	aa	aa	aa	aa	aa
A05	79.962	Block5099	aaxbb	aa	ab	aa	ab	ab	aa	ab	aa	aa	ab	aa	aa	aa	aa	aa	ab	aa	aa	aa	ab	aa	ab	aa	ab	aa	aa	aa	aa	aa	aa	aa	aa	aa	ab	aa	aa	aa	aa	ab	aa	aa	aa	aa	aa	aa	aa
A05	80.662	Block5095	aaxbb	aa	ab	aa	ab	ab	aa	ab	aa	aa	ab	aa	aa	aa	aa	aa	ab	aa	aa	aa	ab	aa	ab	aa	ab	aa	aa	aa	aa	aa	aa	aa	aa	aa	ab	aa	aa	aa	aa	ab	aa	aa	aa	aa	aa	aa	aa
A05	82.112	Block5101	aaxbb	aa	ab	aa	ab	ab	aa	ab	aa	aa	ab	aa	aa	aa	aa	aa	ab	aa	aa	aa	ab	aa	ab	aa	ab	aa	aa	aa	aa	aa	aa	aa	aa	aa	ab	aa	aa	aa	aa	ab	aa	aa	aa	aa	aa	aa	aa
A05	85.066	Block5098	aaxbb	aa	ab	aa	ab	ab	aa	ab	aa	aa	ab	aa	aa	aa	aa	aa	ab	aa	aa	aa	ab	aa	ab	aa	ab	aa	aa	aa	aa	aa	aa	aa	aa	ab	ab	aa	aa	aa	aa	ab	aa	ab	aa	aa	ab	aa	aa
A05	88.622	Block5103	aaxbb	aa	ab	aa	ab	ab	aa	ab	aa	aa	ab	aa	aa	aa	aa	aa	ab	aa	aa	aa	ab	aa	ab	aa	ab	aa	aa	aa	ab	aa	aa	aa	aa	ab	ab	aa	aa	aa	aa	ab	aa	ab	aa	ab	ab	aa	aa
A05	95.566	Block5104	aaxbb	aa	ab	aa	ab	ab	aa	ab	aa	aa	ab	aa	aa	aa	aa	aa	ab	aa	aa	aa	ab	aa	ab	aa	ab	aa	aa	aa	ab	aa	ab	aa	aa	ab	ab	aa	aa	aa	aa	ab	ab	ab	aa	ab	ab	ab	aa
A05	98.67	Block5105	aaxbb	aa	ab	aa	ab	ab	aa	ab	aa	aa	ab	aa	aa	aa	aa	aa	ab	aa	aa	aa	ab	aa	ab	aa	ab	aa	aa	aa	ab	aa	ab	aa	aa	ab	ab	aa	aa	aa	aa	ab	ab	ab	aa	ab	ab	ab	aa
A05	98.92	Block5106	aaxbb	aa	ab	aa	ab	ab	aa	ab	aa	aa	ab	aa	aa	aa	aa	aa	ab	aa	aa	aa	ab	aa	ab	aa	aa	aa	aa	aa	ab	aa	ab	aa	aa	ab	ab	aa	aa	aa	aa	ab	ab	ab	aa	ab	ab	ab	aa
A05	99.17	Block5107	aaxbb	aa	ab	aa	ab	ab	aa	ab	aa	aa	aa	aa	aa	aa	aa	aa	ab	aa	aa	aa	ab	aa	ab	aa	aa	aa	aa	aa	ab	aa	ab	aa	aa	ab	ab	aa	aa	aa	aa	ab	ab	ab	aa	ab	ab	ab	aa
A05	99.67	Block5097	aaxbb	aa	aa	aa	ab	ab	aa	ab	aa	aa	aa	aa	aa	aa	aa	aa	aa	aa	aa	aa	ab	aa	ab	aa	aa	aa	aa	aa	ab	aa	ab	aa	aa	ab	ab	aa	aa	aa	aa	ab	ab	ab	aa	ab	ab	ab	aa
A05	99.92	Block5108	aaxbb	aa	aa	aa	ab	ab	aa	ab	aa	aa	aa	aa	aa	aa	aa	aa	aa	aa	aa	aa	ab	aa	ab	aa	aa	aa	aa	aa	ab	aa	ab	aa	ab	ab	ab	aa	aa	aa	aa	ab	ab	ab	aa	ab	ab	ab	aa
A05	100.17	Block5109	aaxbb	aa	aa	aa	ab	ab	aa	ab	aa	aa	aa	aa	aa	aa	aa	aa	aa	aa	aa	aa	ab	aa	ab	aa	aa	aa	aa	aa	ab	aa	ab	aa	ab	ab	ab	aa	aa	aa	aa	ab	ab	ab	aa	ab	ab	ab	aa
A05	100.42	Block5111	aaxbb	aa	aa	aa	ab	ab	aa	ab	aa	aa	aa	aa	aa	aa	aa	aa	aa	aa	aa	aa	ab	aa	ab	aa	aa	aa	aa	aa	ab	aa	ab	aa	ab	ab	ab	aa	ab	aa	aa	ab	ab	ab	aa	ab	ab	ab	aa
A05	101.97	Block5102	aaxbb	aa	aa	aa	ab	ab	aa	ab	aa	aa	aa	aa	aa	aa	aa	aa	aa	aa	aa	aa	ab	aa	ab	aa	aa	ab	aa	ab	ab	aa	ab	aa	ab	ab	ab	ab	ab	aa	aa	ab	ab	ab	aa	ab	ab	ab	aa
A05	103.021	Block5113	aaxbb	aa	aa	aa	ab	ab	aa	ab	aa	aa	aa	aa	aa	aa	aa	aa	aa	aa	ab	aa	ab	ab	ab	aa	aa	ab	aa	ab	ab	aa	ab	aa	ab	ab	ab	ab	ab	ab	aa	ab	ab	ab	aa	ab	ab	ab	aa
A05	103.521	Block5114	aaxbb	aa	aa	aa	ab	ab	aa	ab	aa	aa	aa	aa	aa	aa	aa	aa	aa	aa	ab	aa	ab	ab	ab	aa	aa	ab	aa	ab	ab	aa	ab	aa	ab	ab	ab	ab	ab	ab	ab	ab	ab	ab	aa	ab	ab	ab	aa
A05	103.521	Block5100	aaxbb	aa	aa	aa	ab	ab	aa	ab	aa	aa	aa	aa	aa	aa	aa	aa	aa	aa	ab	aa	ab	ab	ab	aa	aa	ab	aa	ab	ab	aa	ab	aa	ab	ab	ab	ab	ab	ab	ab	ab	ab	ab	aa	ab	ab	ab	aa
A05	103.771	Block5115	aaxbb	aa	aa	aa	ab	ab	aa	ab	aa	aa	aa	aa	aa	aa	aa	aa	aa	aa	ab	aa	ab	ab	ab	aa	aa	ab	aa	ab	ab	aa	ab	aa	ab	ab	ab	ab	ab	ab	ab	ab	ab	ab	aa	ab	ab	ab	aa
A05	104.271	Block5116	aaxbb	aa	aa	aa	ab	ab	aa	ab	aa	aa	aa	aa	aa	aa	aa	aa	aa	aa	ab	aa	ab	ab	ab	aa	aa	ab	aa	ab	ab	aa	ab	aa	ab	ab	ab	ab	ab	ab	ab	ab	ab	ab	aa	ab	ab	ab	aa
A05	104.271	Block5110	aaxbb	aa	aa	aa	ab	ab	aa	ab	aa	aa	aa	aa	aa	aa	aa	aa	aa	aa	ab	aa	ab	ab	ab	aa	aa	ab	aa	ab	ab	aa	ab	aa	ab	ab	ab	ab	ab	ab	ab	ab	ab	ab	aa	ab	ab	ab	aa
A05	105.021	Block5117	aaxbb	aa	aa	aa	ab	ab	aa	ab	aa	aa	aa	aa	aa	aa	aa	aa	aa	aa	ab	aa	ab	ab	ab	aa	aa	ab	aa	ab	ab	aa	ab	aa	ab	ab	ab	ab	ab	ab	ab	ab	ab	ab	aa	ab	ab	ab	aa
A05	105.521	Block5118	aaxbb	aa	aa	aa	ab	ab	aa	ab	aa	aa	aa	aa	aa	aa	aa	aa	aa	aa	ab	aa	ab	ab	ab	aa	aa	ab	aa	ab	ab	aa	ab	aa	ab	ab	ab	ab	ab	ab	ab	ab	ab	ab	aa	ab	ab	ab	aa
A05	105.521	Block5112	aaxbb	aa	aa	aa	ab	ab	aa	ab	aa	aa	aa	aa	aa	aa	aa	aa	aa	aa	ab	aa	ab	ab	ab	aa	aa	ab	aa	ab	ab	aa	ab	aa	ab	ab	ab	ab	ab	ab	ab	ab	ab	ab	aa	ab	ab	ab	aa
A05	105.771	Block5119	aaxbb	aa	aa	aa	ab	ab	aa	ab	aa	aa	aa	aa	aa	aa	aa	aa	aa	aa	ab	aa	ab	ab	ab	aa	aa	ab	aa	ab	ab	aa	ab	aa	ab	ab	ab	ab	ab	ab	ab	ab	ab	ab	aa	ab	ab	ab	aa
A05	106.821	Block5120	aaxbb	aa	aa	aa	ab	ab	aa	ab	aa	aa	aa	aa	aa	aa	aa	aa	aa	ab	ab	aa	ab	ab	ab	aa	aa	ab	aa	ab	ab	aa	ab	aa	ab	ab	ab	ab	ab	ab	ab	ab	ab	ab	aa	ab	ab	ab	aa
A05	108.121	Block5121	aaxbb	aa	aa	aa	ab	ab	aa	ab	aa	aa	aa	aa	aa	aa	aa	aa	aa	ab	ab	aa	ab	ab	ab	aa	aa	ab	ab	ab	ab	aa	ab	aa	ab	ab	ab	ab	ab	ab	ab	ab	ab	aa	aa	ab	ab	ab	aa
A05	109.421	Block5123	aaxbb	aa	ab	aa	ab	ab	aa	ab	aa	aa	aa	aa	aa	aa	aa	aa	ab	ab	ab	aa	ab	ab	ab	ab	aa	ab	ab	ab	ab	aa	ab	aa	ab	ab	ab	ab	ab	ab	ab	ab	ab	aa	aa	ab	ab	ab	aa
A05	109.671	Block5124	aaxbb	aa	ab	aa	ab	ab	aa	ab	aa	aa	aa	aa	aa	aa	aa	aa	ab	ab	ab	aa	ab	ab	ab	ab	aa	ab	ab	ab	ab	aa	ab	aa	ab	ab	ab	ab	ab	ab	ab	ab	ab	aa	aa	ab	ab	ab	aa
A05	110.972	Block5125	aaxbb	aa	ab	aa	ab	ab	aa	ab	aa	aa	aa	aa	aa	aa	aa	aa	ab	ab	ab	aa	ab	ab	ab	ab	aa	ab	ab	ab	ab	aa	ab	aa	ab	ab	ab	ab	ab	ab	ab	ab	ab	aa	aa	ab	ab	ab	aa
A05	112.022	Block5122	aaxbb	aa	ab	aa	ab	ab	aa	ab	aa	aa	aa	aa	aa	aa	aa	aa	ab	ab	ab	aa	ab	ab	ab	ab	aa	ab	ab	ab	ab	aa	ab	aa	ab	ab	ab	ab	ab	ab	ab	aa	ab	aa	aa	ab	ab	ab	aa
A05	113.072	Block5131	aaxbb	ab	ab	ab	ab	ab	aa	ab	aa	aa	aa	aa	aa	aa	aa	aa	ab	ab	ab	aa	ab	ab	ab	ab	aa	ab	ab	ab	ab	aa	ab	ab	ab	ab	ab	ab	ab	ab	ab	aa	ab	aa	ab	ab	ab	ab	aa
A05	113.872	Block5129	aaxbb	ab	ab	ab	ab	ab	aa	ab	aa	aa	aa	aa	aa	aa	aa	aa	ab	ab	ab	aa	ab	ab	ab	ab	aa	ab	ab	ab	ab	aa	ab	ab	ab	ab	ab	ab	ab	ab	ab	aa	ab	aa	ab	ab	ab	ab	aa
A05	116.525	Block5128	aaxbb	ab	ab	ab	ab	ab	aa	ab	ab	aa	aa	aa	ab	aa	ab	aa	ab	ab	ab	ab	ab	ab	ab	ab	aa	ab	ab	ab	ab	ab	aa	ab	ab	ab	ab	ab	ab	ab	ab	aa	ab	aa	ab	ab	ab	ab	aa
A05	117.825	Block5130	aaxbb	ab	ab	ab	ab	ab	aa	ab	ab	aa	aa	aa	ab	aa	ab	aa	ab	ab	ab	ab	ab	ab	ab	ab	aa	ab	ab	ab	ab	ab	aa	ab	ab	ab	ab	ab	ab	ab	ab	aa	ab	aa	ab	ab	ab	ab	aa
A05	118.625	Block5126	aaxbb	ab	ab	ab	ab	ab	aa	ab	ab	aa	aa	aa	ab	aa	ab	aa	ab	ab	ab	ab	ab	ab	ab	ab	aa	ab	ab	ab	ab	ab	aa	ab	ab	ab	ab	ab	ab	ab	ab	aa	ab	aa	ab	ab	ab	ab	aa
A05	118.625	Block5190	aaxbb	ab	ab	ab	ab	ab	aa	ab	ab	aa	aa	aa	ab	aa	ab	aa	ab	ab	ab	ab	ab	ab	ab	ab	aa	ab	ab	ab	ab	ab	aa	ab	ab	ab	ab	ab	ab	ab	ab	aa	ab	aa	ab	ab	ab	ab	aa
A05	119.125	Block5136	aaxbb	ab	ab	ab	ab	ab	aa	aa	ab	aa	aa	aa	ab	aa	ab	aa	ab	ab	ab	ab	ab	ab	ab	ab	aa	ab	ab	ab	ab	ab	aa	ab	ab	ab	ab	ab	ab	ab	ab	aa	ab	aa	ab	ab	ab	ab	aa
A05	119.125	Block5140	aaxbb	ab	ab	ab	ab	ab	aa	aa	ab	aa	aa	aa	ab	aa	ab	aa	ab	ab	ab	ab	ab	ab	ab	ab	aa	ab	ab	ab	ab	ab	aa	ab	ab	ab	ab	ab	ab	ab	ab	aa	ab	aa	ab	ab	ab	ab	aa
A05	119.125	Block5134	aaxbb	ab	ab	ab	ab	ab	aa	aa	ab	aa	aa	aa	ab	aa	ab	aa	ab	ab	ab	ab	ab	ab	ab	ab	aa	ab	ab	ab	ab	ab	aa	ab	ab	ab	ab	ab	ab	ab	ab	aa	ab	aa	ab	ab	ab	ab	aa
A05	119.125	Block5137	aaxbb	ab	ab	ab	ab	ab	aa	aa	ab	aa	aa	aa	ab	aa	ab	aa	ab	ab	ab	ab	ab	ab	ab	ab	aa	ab	ab	ab	ab	ab	aa	ab	ab	ab	ab	ab	ab	ab	ab	aa	ab	aa	ab	ab	ab	ab	aa
A05	120.725	Block5132	aaxbb	ab	ab	ab	ab	ab	aa	aa	ab	aa	ab	ab	ab	aa	ab	aa	ab	ab	ab	ab	ab	ab	aa	ab	aa	ab	ab	ab	ab	ab	aa	ab	ab	ab	ab	ab	ab	ab	ab	aa	ab	aa	ab	ab	ab	ab	ab
A05	120.975	Block5138	aaxbb	ab	ab	ab	ab	ab	aa	aa	ab	aa	ab	ab	ab	aa	ab	aa	ab	ab	ab	ab	ab	ab	aa	ab	aa	ab	ab	ab	ab	ab	aa	ab	ab	ab	ab	ab	ab	ab	ab	aa	ab	aa	ab	ab	ab	ab	ab
A05	120.975	Block5139	aaxbb	ab	ab	ab	ab	ab	aa	aa	ab	aa	ab	ab	ab	aa	ab	aa	ab	ab	ab	ab	ab	ab	aa	ab	aa	ab	ab	ab	ab	ab	aa	ab	ab	ab	ab	ab	ab	ab	ab	aa	ab	aa	ab	ab	ab	ab	ab
A05	121.475	Block5150	aaxbb	ab	ab	ab	ab	ab	aa	aa	ab	aa	ab	ab	ab	aa	ab	ab	ab	ab	ab	ab	ab	ab	aa	ab	aa	ab	ab	ab	ab	ab	aa	ab	ab	ab	ab	ab	ab	ab	ab	aa	ab	aa	ab	ab	ab	ab	ab
A05	121.475	Block5146	aaxbb	ab	ab	ab	ab	ab	aa	aa	ab	aa	ab	ab	ab	aa	ab	ab	ab	ab	ab	ab	ab	ab	aa	ab	aa	ab	ab	ab	ab	ab	aa	ab	ab	ab	ab	ab	ab	ab	ab	aa	ab	aa	ab	ab	ab	ab	ab
A05	121.725	Block5147	aaxbb	ab	ab	ab	ab	ab	aa	aa	ab	aa	ab	ab	ab	aa	ab	ab	ab	ab	ab	ab	ab	ab	aa	ab	aa	ab	ab	ab	ab	ab	aa	ab	ab	ab	ab	ab	ab	ab	ab	aa	ab	aa	ab	ab	ab	ab	ab
A05	121.975	Block5153	aaxbb	ab	ab	ab	ab	ab	aa	aa	ab	aa	ab	ab	ab	aa	ab	ab	ab	ab	ab	ab	ab	ab	aa	ab	aa	ab	ab	ab	ab	ab	aa	ab	ab	ab	ab	ab	ab	ab	ab	aa	ab	aa	ab	ab	ab	ab	ab
A05	122.525	Block5143	aaxbb	ab	ab	ab	ab	ab	aa	aa	ab	aa	ab	ab	ab	aa	ab	ab	ab	ab	bb	ab	ab	ab	aa	ab	aa	ab	ab	ab	ab	ab	aa	ab	ab	ab	ab	ab	ab	ab	ab	aa	ab	aa	ab	ab	ab	ab	ab
A05	122.525	Block5144	aaxbb	ab	ab	ab	ab	ab	aa	aa	ab	aa	ab	ab	ab	aa	ab	ab	ab	ab	bb	ab	ab	ab	aa	ab	aa	ab	ab	ab	ab	ab	aa	ab	ab	ab	ab	ab	ab	ab	ab	aa	ab	aa	ab	ab	ab	ab	ab
A05	125.33	Block5135	aaxbb	ab	ab	ab	ab	ab	aa	aa	ab	aa	ab	ab	ab	aa	ab	ab	ab	ab	bb	ab	ab	ab	bb	ab	aa	ab	ab	ab	ab	ab	aa	ab	ab	ab	ab	ab	ab	ab	ab	aa	ab	aa	ab	ab	ab	ab	ab
A05	126.481	Block5159	aaxbb	ab	ab	ab	ab	ab	aa	aa	ab	aa	ab	ab	ab	aa	ab	ab	ab	ab	bb	ab	ab	ab	aa	ab	aa	ab	ab	ab	ab	ab	ab	ab	ab	ab	ab	ab	ab	ab	ab	aa	ab	aa	ab	ab	ab	ab	ab
A05	129.139	Block5158	aaxbb	ab	ab	ab	ab	ab	aa	aa	ab	ab	ab	ab	ab	aa	ab	ab	ab	ab	bb	ab	ab	ab	bb	ab	aa	ab	ab	ab	ab	ab	ab	ab	ab	ab	ab	ab	ab	ab	ab	ab	ab	aa	ab	ab	ab	ab	ab
A05	131.04	Block5157	aaxbb	ab	ab	ab	ab	ab	aa	aa	ab	ab	ab	ab	ab	aa	ab	ab	ab	ab	bb	ab	ab	ab	bb	ab	aa	bb	ab	ab	ab	ab	ab	ab	ab	ab	ab	ab	ab	ab	ab	ab	ab	aa	ab	ab	ab	ab	ab
A05	131.745	Block5142	aaxbb	ab	ab	ab	ab	ab	aa	ab	ab	ab	ab	ab	ab	ab	ab	ab	ab	ab	bb	ab	ab	ab	bb	ab	aa	bb	ab	ab	ab	ab	ab	ab	ab	ab	ab	ab	ab	ab	ab	ab	ab	aa	ab	ab	ab	ab	ab
A05	131.745	Block5154	aaxbb	ab	ab	ab	ab	ab	aa	ab	ab	ab	ab	ab	ab	ab	ab	ab	ab	ab	bb	ab	ab	ab	bb	ab	aa	bb	ab	ab	ab	ab	ab	ab	ab	ab	ab	ab	ab	ab	ab	ab	ab	aa	ab	ab	ab	ab	ab
A05	132.845	Block5196	aaxbb	ab	ab	ab	ab	ab	aa	ab	ab	ab	ab	ab	ab	ab	ab	ab	ab	ab	bb	ab	bb	ab	bb	ab	aa	bb	ab	ab	ab	bb	ab	ab	ab	ab	ab	ab	ab	ab	ab	ab	ab	aa	ab	ab	ab	ab	ab
A05	132.845	Block5155	aaxbb	ab	ab	ab	ab	ab	aa	ab	ab	ab	ab	ab	ab	ab	ab	ab	ab	ab	bb	ab	bb	ab	bb	ab	aa	bb	ab	ab	ab	bb	ab	ab	ab	ab	ab	ab	ab	ab	ab	ab	ab	aa	ab	ab	ab	ab	ab
A05	133.095	Block5151	aaxbb	ab	ab	ab	ab	ab	aa	ab	ab	ab	ab	ab	ab	ab	ab	ab	ab	ab	bb	ab	bb	ab	bb	ab	aa	bb	ab	ab	ab	bb	ab	ab	ab	ab	ab	ab	ab	ab	ab	ab	ab	aa	bb	ab	ab	ab	ab
A05	133.095	Block5152	aaxbb	ab	ab	ab	ab	ab	aa	ab	ab	ab	ab	ab	ab	ab	ab	ab	ab	ab	bb	ab	bb	ab	bb	ab	aa	bb	ab	ab	ab	bb	ab	ab	ab	ab	ab	ab	ab	ab	ab	ab	ab	aa	bb	ab	ab	ab	ab
A05	133.645	Block5208	aaxbb	ab	ab	ab	ab	ab	aa	ab	ab	ab	ab	ab	ab	ab	ab	ab	ab	ab	bb	ab	bb	ab	bb	ab	aa	bb	ab	ab	ab	bb	ab	ab	ab	ab	ab	ab	ab	ab	ab	ab	ab	aa	bb	ab	ab	ab	ab
A05	133.895	Block5195	aaxbb	ab	ab	ab	ab	ab	aa	ab	ab	ab	ab	ab	ab	ab	ab	ab	ab	ab	bb	ab	bb	ab	bb	ab	aa	bb	ab	aa	ab	bb	ab	ab	ab	ab	ab	ab	ab	ab	ab	ab	ab	aa	bb	ab	ab	ab	ab
A05	134.145	Block5205	aaxbb	ab	ab	ab	ab	ab	aa	ab	ab	ab	ab	ab	ab	ab	ab	ab	ab	ab	bb	ab	bb	ab	bb	ab	aa	bb	ab	aa	ab	bb	ab	ab	ab	ab	ab	ab	ab	ab	ab	ab	ab	aa	bb	ab	ab	ab	ab
A05	134.395	Block5156	aaxbb	ab	ab	ab	ab	ab	aa	ab	ab	ab	ab	ab	ab	ab	ab	ab	ab	ab	bb	ab	bb	ab	bb	ab	aa	bb	ab	aa	ab	bb	ab	ab	ab	ab	ab	ab	ab	ab	ab	ab	ab	aa	bb	ab	ab	ab	ab
A05	134.395	Block5199	aaxbb	ab	ab	ab	ab	ab	aa	ab	ab	ab	ab	ab	ab	ab	ab	ab	ab	ab	bb	ab	bb	ab	bb	ab	aa	bb	ab	aa	ab	bb	ab	ab	ab	ab	ab	ab	ab	ab	ab	ab	ab	aa	bb	ab	ab	ab	ab
A05	135.195	Block5218	aaxbb	aa	ab	aa	ab	ab	aa	ab	ab	ab	ab	ab	ab	ab	ab	ab	ab	aa	bb	ab	bb	ab	bb	ab	aa	bb	ab	aa	ab	bb	ab	ab	ab	ab	ab	ab	ab	ab	ab	ab	ab	aa	bb	ab	ab	ab	ab
A05	135.445	Block5224	aaxbb	aa	ab	aa	ab	ab	aa	ab	ab	ab	ab	aa	ab	ab	ab	ab	ab	aa	bb	ab	bb	ab	bb	ab	aa	bb	ab	aa	ab	bb	ab	ab	ab	ab	ab	ab	ab	ab	ab	ab	ab	aa	bb	ab	ab	ab	ab
A05	135.445	Block5149	aaxbb	aa	ab	aa	ab	ab	aa	ab	ab	ab	ab	aa	ab	ab	ab	ab	ab	aa	bb	ab	bb	ab	bb	ab	aa	bb	ab	aa	ab	bb	ab	ab	ab	ab	ab	ab	ab	ab	ab	ab	ab	aa	bb	ab	ab	ab	ab
A05	135.445	Block5145	aaxbb	aa	ab	aa	ab	ab	aa	ab	ab	ab	ab	aa	ab	ab	ab	ab	ab	aa	bb	ab	bb	ab	bb	ab	aa	bb	ab	aa	ab	bb	ab	ab	ab	ab	ab	ab	ab	ab	ab	ab	ab	aa	bb	ab	ab	ab	ab
A05	135.445	Block5141	aaxbb	aa	ab	aa	ab	ab	aa	ab	ab	ab	ab	aa	ab	ab	ab	ab	ab	aa	bb	ab	bb	ab	bb	ab	aa	bb	ab	aa	ab	bb	ab	ab	ab	ab	ab	ab	ab	ab	ab	ab	ab	aa	bb	ab	ab	ab	ab
A05	135.445	Block5148	aaxbb	aa	ab	aa	ab	ab	aa	ab	ab	ab	ab	aa	ab	ab	ab	ab	ab	aa	bb	ab	bb	ab	bb	ab	aa	bb	ab	aa	ab	bb	ab	ab	ab	ab	ab	ab	ab	ab	ab	ab	ab	aa	bb	ab	ab	ab	ab
A05	135.445	Block5204	aaxbb	aa	ab	aa	ab	ab	aa	ab	ab	ab	ab	aa	ab	ab	ab	ab	ab	aa	bb	ab	bb	ab	bb	ab	aa	bb	ab	aa	ab	bb	ab	ab	ab	ab	ab	ab	ab	ab	ab	ab	ab	aa	bb	ab	ab	ab	ab
A05	136.897	Block5240	aaxbb	aa	ab	aa	ab	ab	aa	ab	ab	ab	ab	aa	ab	ab	ab	ab	ab	aa	bb	ab	bb	aa	bb	ab	aa	bb	aa	aa	ab	bb	ab	ab	ab	ab	ab	ab	ab	ab	ab	ab	ab	aa	bb	ab	ab	ab	ab
A05	138.247	Block5247	aaxbb	aa	ab	aa	ab	ab	aa	ab	ab	ab	ab	aa	ab	ab	ab	ab	ab	aa	bb	ab	bb	aa	bb	aa	aa	bb	aa	aa	ab	bb	ab	ab	ab	ab	ab	ab	ab	ab	ab	ab	ab	aa	bb	ab	ab	ab	ab
A05	139.597	Block5269	aaxbb	aa	ab	aa	ab	ab	aa	ab	ab	ab	aa	aa	ab	ab	ab	ab	ab	aa	bb	ab	bb	aa	bb	aa	aa	bb	aa	aa	ab	ab	ab	ab	ab	ab	ab	ab	ab	ab	ab	ab	ab	aa	ab	ab	ab	ab	ab
A05	139.847	Block5197	aaxbb	aa	ab	aa	ab	ab	aa	ab	ab	ab	aa	aa	ab	ab	ab	ab	ab	aa	bb	ab	bb	aa	bb	aa	aa	bb	aa	aa	ab	ab	ab	ab	ab	ab	ab	ab	ab	ab	ab	ab	ab	aa	ab	ab	ab	ab	ab
A05	142.972	Block5198	aaxbb	aa	ab	aa	ab	ab	aa	ab	aa	ab	aa	aa	ab	aa	ab	ab	ab	aa	aa	ab	aa	aa	aa	aa	aa	aa	aa	aa	ab	ab	ab	ab	ab	ab	ab	ab	ab	ab	ab	ab	ab	aa	ab	ab	ab	ab	ab
A05	147.031	Block5267	aaxbb	aa	ab	aa	aa	aa	aa	aa	aa	ab	aa	aa	aa	aa	ab	aa	ab	aa	aa	ab	aa	aa	aa	aa	aa	aa	aa	aa	ab	ab	ab	ab	ab	ab	ab	ab	ab	ab	ab	ab	ab	aa	ab	ab	ab	ab	ab
A05	148.081	Block5220	aaxbb	aa	ab	aa	aa	aa	aa	aa	aa	ab	aa	aa	aa	aa	ab	aa	aa	aa	aa	ab	aa	aa	aa	aa	aa	aa	aa	aa	ab	ab	ab	ab	ab	ab	ab	ab	ab	ab	ab	ab	ab	aa	ab	ab	ab	ab	ab
A05	148.881	Block5228	aaxbb	aa	ab	aa	aa	aa	aa	aa	aa	aa	aa	aa	aa	aa	ab	aa	aa	aa	aa	ab	aa	aa	aa	aa	aa	aa	aa	aa	ab	ab	ab	ab	ab	ab	ab	ab	ab	ab	ab	ab	ab	aa	ab	ab	ab	ab	ab
A05	149.381	Block5223	aaxbb	aa	ab	aa	aa	aa	aa	aa	aa	aa	aa	aa	aa	aa	aa	aa	aa	aa	aa	ab	aa	aa	aa	aa	aa	aa	aa	aa	ab	ab	ab	ab	ab	ab	ab	ab	ab	ab	ab	ab	ab	aa	ab	ab	ab	ab	ab
A05	149.881	Block5237	aaxbb	aa	ab	aa	aa	aa	aa	aa	aa	aa	aa	aa	aa	aa	aa	aa	aa	aa	aa	aa	aa	aa	aa	aa	aa	aa	aa	aa	ab	ab	ab	ab	ab	ab	ab	ab	ab	ab	ab	ab	ab	aa	ab	ab	ab	ab	aa
A05	149.881	Block5262	aaxbb	aa	ab	aa	aa	aa	aa	aa	aa	aa	aa	aa	aa	aa	aa	aa	aa	aa	aa	aa	aa	aa	aa	aa	aa	aa	aa	aa	ab	ab	ab	ab	ab	ab	ab	ab	ab	ab	ab	ab	ab	aa	ab	ab	ab	ab	aa
A05	150.131	Block5243	aaxbb	aa	ab	aa	aa	aa	aa	aa	aa	aa	aa	aa	aa	aa	aa	aa	aa	aa	aa	aa	aa	aa	aa	aa	aa	aa	aa	aa	ab	ab	ab	ab	ab	ab	ab	ab	ab	ab	ab	ab	ab	aa	ab	ab	ab	ab	aa
A05	150.131	Block5266	aaxbb	aa	ab	aa	aa	aa	aa	aa	aa	aa	aa	aa	aa	aa	aa	aa	aa	aa	aa	aa	aa	aa	aa	aa	aa	aa	aa	aa	ab	ab	ab	ab	ab	ab	ab	ab	ab	ab	ab	ab	ab	aa	ab	ab	ab	ab	aa
A05	150.881	Block5259	aaxbb	aa	aa	aa	aa	aa	aa	aa	aa	aa	aa	aa	aa	aa	aa	aa	aa	aa	aa	aa	aa	aa	aa	aa	aa	aa	aa	aa	ab	ab	ab	ab	ab	ab	ab	ab	ab	ab	ab	ab	ab	aa	ab	ab	ab	ab	aa
A05	150.881	Block5231	aaxbb	aa	aa	aa	aa	aa	aa	aa	aa	aa	aa	aa	aa	aa	aa	aa	aa	aa	aa	aa	aa	aa	aa	aa	aa	aa	aa	aa	ab	ab	ab	ab	ab	ab	ab	ab	ab	ab	ab	ab	ab	aa	ab	ab	ab	ab	aa
A05	150.881	Block5226	aaxbb	aa	aa	aa	aa	aa	aa	aa	aa	aa	aa	aa	aa	aa	aa	aa	aa	aa	aa	aa	aa	aa	aa	aa	aa	aa	aa	aa	ab	ab	ab	ab	ab	ab	ab	ab	ab	ab	ab	ab	ab	aa	ab	ab	ab	ab	aa
A05	150.881	Block5225	aaxbb	aa	aa	aa	aa	aa	aa	aa	aa	aa	aa	aa	aa	aa	aa	aa	aa	aa	aa	aa	aa	aa	aa	aa	aa	aa	aa	aa	ab	ab	ab	ab	ab	ab	ab	ab	ab	ab	ab	ab	ab	aa	ab	ab	ab	ab	aa
A05	150.881	Block5241	aaxbb	aa	aa	aa	aa	aa	aa	aa	aa	aa	aa	aa	aa	aa	aa	aa	aa	aa	aa	aa	aa	aa	aa	aa	aa	aa	aa	aa	ab	ab	ab	ab	ab	ab	ab	ab	ab	ab	ab	ab	ab	aa	ab	ab	ab	ab	aa
A05	150.881	Block5233	aaxbb	aa	aa	aa	aa	aa	aa	aa	aa	aa	aa	aa	aa	aa	aa	aa	aa	aa	aa	aa	aa	aa	aa	aa	aa	aa	aa	aa	ab	ab	ab	ab	ab	ab	ab	ab	ab	ab	ab	ab	ab	aa	ab	ab	ab	ab	aa
A05	151.131	Block5250	aaxbb	aa	aa	aa	aa	aa	aa	aa	aa	aa	aa	aa	aa	aa	aa	aa	aa	aa	aa	aa	aa	aa	aa	aa	aa	aa	aa	aa	ab	ab	ab	ab	ab	ab	ab	ab	ab	ab	ab	ab	ab	aa	ab	ab	ab	ab	aa
A05	151.131	Block5249	aaxbb	aa	aa	aa	aa	aa	aa	aa	aa	aa	aa	aa	aa	aa	aa	aa	aa	aa	aa	aa	aa	aa	aa	aa	aa	aa	aa	aa	ab	ab	ab	ab	ab	ab	ab	ab	ab	ab	ab	ab	ab	aa	ab	ab	ab	ab	aa
A05	151.131	Block5246	aaxbb	aa	aa	aa	aa	aa	aa	aa	aa	aa	aa	aa	aa	aa	aa	aa	aa	aa	aa	aa	aa	aa	aa	aa	aa	aa	aa	aa	ab	ab	ab	ab	ab	ab	ab	ab	ab	ab	ab	ab	ab	aa	ab	ab	ab	ab	aa
A05	151.131	Block5263	aaxbb	aa	aa	aa	aa	aa	aa	aa	aa	aa	aa	aa	aa	aa	aa	aa	aa	aa	aa	aa	aa	aa	aa	aa	aa	aa	aa	aa	ab	ab	ab	ab	ab	ab	ab	ab	ab	ab	ab	ab	ab	aa	ab	ab	ab	ab	aa
A05	151.131	Block5133	aaxbb	aa	aa	aa	aa	aa	aa	aa	aa	aa	aa	aa	aa	aa	aa	aa	aa	aa	aa	aa	aa	aa	aa	aa	aa	aa	aa	aa	ab	ab	ab	ab	ab	ab	ab	ab	ab	ab	ab	ab	ab	aa	ab	ab	ab	ab	aa
A05	151.131	Block5232	aaxbb	aa	aa	aa	aa	aa	aa	aa	aa	aa	aa	aa	aa	aa	aa	aa	aa	aa	aa	aa	aa	aa	aa	aa	aa	aa	aa	aa	ab	ab	ab	ab	ab	ab	ab	ab	ab	ab	ab	ab	ab	aa	ab	ab	ab	ab	aa
A05	151.131	Block5268	aaxbb	aa	aa	aa	aa	aa	aa	aa	aa	aa	aa	aa	aa	aa	aa	aa	aa	aa	aa	aa	aa	aa	aa	aa	aa	aa	aa	aa	ab	ab	ab	ab	ab	ab	ab	ab	ab	ab	ab	ab	ab	aa	ab	ab	ab	ab	aa
A05	151.131	Block5251	aaxbb	aa	aa	aa	aa	aa	aa	aa	aa	aa	aa	aa	aa	aa	aa	aa	aa	aa	aa	aa	aa	aa	aa	aa	aa	aa	aa	aa	ab	ab	ab	ab	ab	ab	ab	ab	ab	ab	ab	ab	ab	aa	ab	ab	ab	ab	aa
A05	151.131	Block5236	aaxbb	aa	aa	aa	aa	aa	aa	aa	aa	aa	aa	aa	aa	aa	aa	aa	aa	aa	aa	aa	aa	aa	aa	aa	aa	aa	aa	aa	ab	ab	ab	ab	ab	ab	ab	ab	ab	ab	ab	ab	ab	aa	ab	ab	ab	ab	aa
A05	151.131	Block5260	aaxbb	aa	aa	aa	aa	aa	aa	aa	aa	aa	aa	aa	aa	aa	aa	aa	aa	aa	aa	aa	aa	aa	aa	aa	aa	aa	aa	aa	ab	ab	ab	ab	ab	ab	ab	ab	ab	ab	ab	ab	ab	aa	ab	ab	ab	ab	aa
A05	151.131	Block5235	aaxbb	aa	aa	aa	aa	aa	aa	aa	aa	aa	aa	aa	aa	aa	aa	aa	aa	aa	aa	aa	aa	aa	aa	aa	aa	aa	aa	aa	ab	ab	ab	ab	ab	ab	ab	ab	ab	ab	ab	ab	ab	aa	ab	ab	ab	ab	aa
A05	151.131	Block5234	aaxbb	aa	aa	aa	aa	aa	aa	aa	aa	aa	aa	aa	aa	aa	aa	aa	aa	aa	aa	aa	aa	aa	aa	aa	aa	aa	aa	aa	ab	ab	ab	ab	ab	ab	ab	ab	ab	ab	ab	ab	ab	aa	ab	ab	ab	ab	aa
A05	151.131	Block5242	aaxbb	aa	aa	aa	aa	aa	aa	aa	aa	aa	aa	aa	aa	aa	aa	aa	aa	aa	aa	aa	aa	aa	aa	aa	aa	aa	aa	aa	ab	ab	ab	ab	ab	ab	ab	ab	ab	ab	ab	ab	ab	aa	ab	ab	ab	ab	aa
A05	151.131	Block5238	aaxbb	aa	aa	aa	aa	aa	aa	aa	aa	aa	aa	aa	aa	aa	aa	aa	aa	aa	aa	aa	aa	aa	aa	aa	aa	aa	aa	aa	ab	ab	ab	ab	ab	ab	ab	ab	ab	ab	ab	ab	ab	aa	ab	ab	ab	ab	aa
A05	151.631	Block5258	aaxbb	aa	aa	aa	aa	aa	aa	aa	aa	aa	aa	aa	aa	aa	aa	aa	aa	aa	aa	aa	aa	aa	aa	aa	aa	aa	aa	aa	ab	ab	ab	ab	ab	ab	ab	ab	ab	ab	ab	ab	ab	aa	ab	ab	ab	ab	aa
A05	151.631	Block5257	aaxbb	aa	aa	aa	aa	aa	aa	aa	aa	aa	aa	aa	aa	aa	aa	aa	aa	aa	aa	aa	aa	aa	aa	aa	aa	aa	aa	aa	ab	ab	ab	ab	ab	ab	ab	ab	ab	ab	ab	ab	ab	aa	ab	ab	ab	ab	aa
A05	151.631	Block5256	aaxbb	aa	aa	aa	aa	aa	aa	aa	aa	aa	aa	aa	aa	aa	aa	aa	aa	aa	aa	aa	aa	aa	aa	aa	aa	aa	aa	aa	ab	ab	ab	ab	ab	ab	ab	ab	ab	ab	ab	ab	ab	aa	ab	ab	ab	ab	aa
A05	151.631	Block5255	aaxbb	aa	aa	aa	aa	aa	aa	aa	aa	aa	aa	aa	aa	aa	aa	aa	aa	aa	aa	aa	aa	aa	aa	aa	aa	aa	aa	aa	ab	ab	ab	ab	ab	ab	ab	ab	ab	ab	ab	ab	ab	aa	ab	ab	ab	ab	aa
A05	151.631	Block5254	aaxbb	aa	aa	aa	aa	aa	aa	aa	aa	aa	aa	aa	aa	aa	aa	aa	aa	aa	aa	aa	aa	aa	aa	aa	aa	aa	aa	aa	ab	ab	ab	ab	ab	ab	ab	ab	ab	ab	ab	ab	ab	aa	ab	ab	ab	ab	aa
A05	151.631	Block5253	aaxbb	aa	aa	aa	aa	aa	aa	aa	aa	aa	aa	aa	aa	aa	aa	aa	aa	aa	aa	aa	aa	aa	aa	aa	aa	aa	aa	aa	ab	ab	ab	ab	ab	ab	ab	ab	ab	ab	ab	ab	ab	aa	ab	ab	ab	ab	aa
A05	151.631	Block5252	aaxbb	aa	aa	aa	aa	aa	aa	aa	aa	aa	aa	aa	aa	aa	aa	aa	aa	aa	aa	aa	aa	aa	aa	aa	aa	aa	aa	aa	ab	ab	ab	ab	ab	ab	ab	ab	ab	ab	ab	ab	ab	aa	ab	ab	ab	ab	aa
A06	0	Block5283	aaxbb	ab	ab	ab	ab	ab	aa	ab	ab	bb	bb	ab	ab	bb	ab	aa	bb	bb	aa	ab	ab	aa	ab	ab	ab	aa	aa	aa	ab	ab	ab	ab	ab	ab	aa	ab	ab	aa	aa	ab	aa	bb	bb	ab	bb	ab	bb
A06	0	Block5289	aaxbb	ab	ab	ab	ab	ab	aa	ab	ab	bb	bb	ab	ab	bb	ab	aa	bb	bb	aa	ab	ab	aa	ab	ab	ab	aa	aa	aa	ab	ab	ab	ab	ab	ab	aa	ab	ab	aa	aa	ab	aa	bb	bb	ab	bb	ab	bb
A06	0	Block5286	aaxbb	ab	ab	ab	ab	ab	aa	ab	ab	bb	bb	ab	ab	bb	ab	aa	bb	bb	aa	ab	ab	aa	ab	ab	ab	aa	aa	aa	ab	ab	ab	ab	ab	ab	aa	ab	ab	aa	aa	ab	aa	bb	bb	ab	bb	ab	bb
A06	0.25	Block5279	aaxbb	ab	ab	ab	ab	ab	aa	ab	ab	bb	bb	ab	ab	bb	ab	aa	bb	bb	aa	ab	ab	aa	ab	ab	ab	aa	aa	aa	ab	ab	ab	ab	ab	ab	aa	ab	ab	aa	aa	ab	aa	bb	bb	ab	bb	ab	bb
A06	0.75	Block5333	aaxbb	ab	ab	ab	ab	ab	aa	ab	ab	bb	bb	ab	ab	bb	ab	aa	bb	bb	aa	ab	ab	aa	ab	ab	ab	aa	aa	aa	ab	ab	ab	ab	ab	ab	aa	ab	ab	aa	aa	ab	aa	bb	bb	ab	ab	ab	bb
A06	1.25	Block5335	aaxbb	ab	ab	ab	ab	ab	aa	ab	ab	bb	bb	ab	ab	bb	ab	aa	bb	bb	aa	ab	ab	aa	ab	ab	ab	aa	aa	aa	ab	ab	ab	ab	bb	ab	aa	ab	ab	aa	aa	ab	aa	bb	bb	ab	ab	ab	bb
A06	1.75	Block5337	aaxbb	ab	ab	ab	ab	ab	aa	ab	ab	bb	bb	ab	ab	bb	ab	aa	bb	bb	aa	ab	ab	aa	ab	ab	ab	aa	aa	aa	ab	ab	ab	ab	bb	ab	aa	ab	ab	aa	aa	ab	aa	bb	bb	ab	ab	ab	bb
A06	2.25	Block5340	aaxbb	ab	ab	ab	ab	ab	aa	ab	ab	bb	bb	ab	ab	bb	ab	aa	bb	bb	aa	ab	ab	aa	ab	ab	ab	aa	aa	aa	aa	ab	ab	ab	bb	ab	aa	ab	ab	aa	aa	ab	aa	bb	bb	ab	ab	ab	bb
A06	2.75	Block5341	aaxbb	ab	ab	ab	ab	ab	aa	ab	ab	bb	bb	ab	ab	bb	ab	aa	bb	bb	aa	ab	ab	aa	ab	ab	ab	aa	aa	aa	aa	ab	ab	ab	bb	ab	aa	ab	ab	aa	aa	ab	aa	bb	bb	ab	ab	ab	bb
A06	3	Block5342	aaxbb	ab	ab	ab	ab	ab	aa	ab	ab	bb	bb	ab	ab	bb	ab	aa	bb	bb	aa	ab	ab	aa	ab	ab	ab	aa	aa	aa	aa	ab	ab	ab	bb	ab	aa	ab	ab	aa	aa	ab	aa	bb	bb	ab	ab	ab	bb
A06	3.5	Block5345	aaxbb	ab	ab	ab	ab	ab	aa	ab	ab	bb	bb	ab	ab	bb	ab	aa	bb	bb	aa	ab	ab	aa	ab	ab	ab	aa	aa	aa	aa	ab	ab	ab	bb	ab	aa	ab	ab	aa	aa	ab	aa	bb	bb	ab	ab	ab	bb
A06	4.25	Block5350	aaxbb	ab	ab	ab	ab	ab	aa	ab	ab	bb	bb	ab	ab	bb	ab	aa	bb	bb	aa	ab	ab	aa	ab	ab	ab	aa	aa	aa	aa	ab	ab	ab	bb	ab	aa	ab	ab	aa	aa	ab	aa	bb	bb	ab	ab	ab	bb
A06	4.25	Block5348	aaxbb	ab	ab	ab	ab	ab	aa	ab	ab	bb	bb	ab	ab	bb	ab	aa	bb	bb	aa	ab	ab	aa	ab	ab	ab	aa	aa	aa	aa	ab	ab	ab	bb	ab	aa	ab	ab	aa	aa	ab	aa	bb	bb	ab	ab	ab	bb
A06	4.25	Block5349	aaxbb	ab	ab	ab	ab	ab	aa	ab	ab	bb	bb	ab	ab	bb	ab	aa	bb	bb	aa	ab	ab	aa	ab	ab	ab	aa	aa	aa	aa	ab	ab	ab	bb	ab	aa	ab	ab	aa	aa	ab	aa	bb	bb	ab	ab	ab	bb
A06	7.856	Block5451	aaxbb	ab	ab	ab	ab	ab	aa	ab	ab	ab	bb	ab	ab	bb	ab	aa	bb	bb	aa	ab	ab	aa	ab	ab	ab	aa	aa	aa	aa	ab	ab	ab	bb	ab	aa	ab	ab	aa	aa	ab	aa	bb	bb	ab	bb	ab	bb
A06	7.856	Block5452	aaxbb	ab	ab	ab	ab	ab	aa	ab	ab	ab	bb	ab	ab	bb	ab	aa	bb	bb	aa	ab	ab	aa	ab	ab	ab	aa	aa	aa	aa	ab	ab	ab	bb	ab	aa	ab	ab	aa	aa	ab	aa	bb	bb	ab	bb	ab	bb
A06	8.106	Block5453	aaxbb	ab	ab	ab	ab	ab	aa	ab	ab	ab	bb	ab	ab	bb	ab	aa	bb	bb	aa	ab	ab	aa	ab	ab	ab	aa	aa	aa	aa	ab	ab	ab	bb	ab	aa	ab	ab	aa	aa	ab	aa	bb	bb	ab	bb	ab	bb
A06	8.856	Block5456	aaxbb	ab	ab	ab	ab	ab	aa	ab	ab	ab	bb	ab	ab	bb	ab	aa	bb	bb	aa	ab	ab	aa	ab	ab	ab	aa	aa	aa	aa	ab	ab	ab	bb	ab	aa	ab	ab	aa	aa	ab	aa	bb	bb	ab	bb	ab	bb
A06	9.106	Block5457	aaxbb	ab	ab	ab	ab	ab	aa	ab	ab	ab	bb	ab	ab	bb	ab	aa	bb	bb	aa	ab	ab	aa	ab	ab	ab	aa	aa	aa	aa	ab	ab	ab	bb	ab	aa	ab	ab	aa	aa	ab	aa	bb	bb	ab	bb	ab	bb
A06	9.106	Block5455	aaxbb	ab	ab	ab	ab	ab	aa	ab	ab	ab	bb	ab	ab	bb	ab	aa	bb	bb	aa	ab	ab	aa	ab	ab	ab	aa	aa	aa	aa	ab	ab	ab	bb	ab	aa	ab	ab	aa	aa	ab	aa	bb	bb	ab	bb	ab	bb
A06	10.106	Block5461	aaxbb	ab	ab	ab	ab	ab	aa	ab	ab	ab	ab	ab	ab	bb	ab	aa	bb	bb	aa	ab	ab	aa	ab	ab	ab	aa	aa	ab	aa	ab	ab	ab	bb	ab	aa	ab	ab	aa	aa	ab	aa	bb	bb	ab	bb	ab	bb
A06	10.606	Block5465	aaxbb	ab	ab	ab	ab	ab	aa	ab	ab	ab	ab	ab	ab	bb	ab	aa	bb	bb	aa	ab	ab	aa	ab	ab	ab	aa	aa	ab	aa	ab	ab	ab	bb	ab	aa	ab	ab	aa	aa	ab	aa	bb	bb	ab	bb	ab	bb
A06	10.606	Block5466	aaxbb	ab	ab	ab	ab	ab	aa	ab	ab	ab	ab	ab	ab	bb	ab	aa	bb	bb	aa	ab	ab	aa	ab	ab	ab	aa	aa	ab	aa	ab	ab	ab	bb	ab	aa	ab	ab	aa	aa	ab	aa	bb	bb	ab	bb	ab	bb
A06	11.356	Block5511	aaxbb	ab	ab	ab	ab	ab	aa	ab	ab	ab	ab	ab	ab	bb	ab	aa	bb	bb	aa	ab	ab	aa	ab	ab	ab	aa	aa	ab	aa	ab	ab	ab	bb	ab	aa	ab	ab	aa	aa	ab	aa	bb	bb	ab	bb	ab	bb
A06	16.779	Block5731	aaxbb	ab	ab	ab	ab	ab	aa	ab	ab	ab	ab	bb	ab	bb	ab	aa	bb	bb	aa	ab	ab	aa	ab	ab	ab	ab	aa	ab	aa	ab	ab	ab	bb	ab	aa	ab	ab	aa	aa	ab	aa	bb	bb	bb	bb	ab	bb
A06	17.529	Block5736	aaxbb	ab	ab	ab	ab	ab	aa	ab	ab	ab	ab	bb	ab	bb	ab	aa	bb	bb	aa	ab	ab	ab	ab	ab	ab	ab	aa	ab	aa	ab	ab	ab	bb	ab	aa	ab	ab	aa	aa	ab	aa	bb	bb	bb	bb	ab	bb
A06	18.029	Block5738	aaxbb	ab	ab	ab	ab	ab	aa	ab	ab	ab	ab	bb	ab	bb	ab	aa	bb	bb	aa	ab	ab	ab	ab	ab	ab	ab	aa	ab	aa	ab	ab	ab	bb	ab	ab	ab	ab	aa	aa	ab	aa	bb	bb	bb	bb	ab	bb
A06	18.529	Block5742	aaxbb	ab	ab	ab	ab	ab	aa	ab	ab	ab	ab	bb	ab	bb	ab	aa	bb	bb	aa	ab	ab	ab	ab	ab	ab	ab	aa	ab	aa	ab	ab	ab	bb	ab	ab	ab	ab	aa	aa	ab	aa	bb	bb	bb	bb	ab	bb
A06	19.029	Block5744	aaxbb	ab	ab	ab	ab	ab	aa	ab	ab	ab	ab	bb	ab	bb	ab	aa	bb	bb	aa	ab	ab	ab	ab	ab	ab	ab	aa	bb	aa	ab	ab	ab	bb	ab	ab	ab	ab	aa	aa	ab	aa	bb	bb	bb	bb	ab	bb
A06	19.529	Block5751	aaxbb	ab	ab	ab	ab	bb	aa	ab	ab	ab	ab	bb	ab	bb	ab	aa	bb	bb	aa	ab	ab	ab	ab	ab	ab	ab	aa	bb	aa	ab	ab	ab	bb	ab	ab	ab	ab	aa	aa	ab	aa	bb	bb	bb	bb	ab	bb
A06	19.779	Block5752	aaxbb	ab	ab	ab	ab	bb	aa	ab	ab	ab	ab	bb	ab	bb	ab	aa	bb	bb	aa	ab	ab	ab	ab	ab	ab	ab	aa	bb	aa	ab	ab	ab	bb	ab	ab	ab	ab	aa	aa	ab	aa	bb	bb	bb	bb	ab	bb
A06	20.529	Block5757	aaxbb	ab	bb	ab	ab	bb	aa	ab	ab	ab	ab	bb	ab	bb	ab	aa	bb	bb	aa	ab	ab	ab	ab	ab	ab	ab	aa	bb	aa	ab	ab	ab	bb	ab	ab	ab	ab	aa	aa	ab	aa	bb	bb	bb	bb	ab	bb
A06	21.029	Block5761	aaxbb	ab	ab	ab	ab	bb	aa	ab	ab	ab	ab	bb	ab	bb	ab	aa	bb	bb	aa	ab	ab	ab	ab	ab	ab	ab	aa	bb	aa	ab	ab	ab	bb	ab	ab	ab	ab	aa	aa	ab	aa	bb	bb	bb	bb	ab	bb
A06	21.529	Block5767	aaxbb	ab	ab	ab	ab	bb	aa	ab	ab	ab	ab	bb	ab	bb	ab	aa	bb	bb	aa	ab	ab	ab	ab	ab	ab	ab	aa	bb	aa	ab	ab	ab	bb	ab	ab	ab	ab	aa	aa	ab	aa	bb	bb	bb	bb	ab	bb
A06	21.779	Block5772	aaxbb	ab	bb	ab	ab	bb	aa	ab	ab	ab	ab	bb	ab	bb	ab	aa	bb	bb	aa	ab	ab	ab	ab	ab	ab	ab	aa	bb	aa	ab	ab	ab	bb	ab	ab	ab	ab	aa	aa	ab	aa	bb	bb	bb	bb	ab	bb
A06	22.279	Block5774	aaxbb	ab	bb	ab	ab	bb	aa	ab	ab	ab	ab	bb	ab	bb	ab	aa	bb	bb	aa	ab	ab	ab	ab	ab	ab	ab	aa	bb	aa	ab	aa	ab	bb	ab	ab	ab	ab	aa	aa	ab	aa	bb	bb	bb	bb	ab	bb
A06	22.779	Block5778	aaxbb	ab	bb	ab	ab	bb	aa	ab	ab	ab	ab	bb	ab	bb	ab	aa	bb	bb	aa	ab	ab	ab	ab	ab	ab	ab	aa	bb	aa	ab	aa	ab	bb	ab	ab	ab	ab	aa	aa	ab	aa	bb	bb	bb	bb	ab	bb
A06	22.779	Block5779	aaxbb	ab	bb	ab	ab	bb	aa	ab	ab	ab	ab	bb	ab	bb	ab	aa	bb	bb	aa	ab	ab	ab	ab	ab	ab	ab	aa	bb	aa	ab	aa	ab	bb	ab	ab	ab	ab	aa	aa	ab	aa	bb	bb	bb	bb	ab	bb
A06	22.779	Block5790	aaxbb	ab	bb	ab	ab	bb	aa	ab	ab	ab	ab	bb	ab	bb	ab	aa	bb	bb	aa	ab	ab	ab	ab	ab	ab	ab	aa	bb	aa	ab	aa	ab	bb	ab	ab	ab	ab	aa	aa	ab	aa	bb	bb	bb	bb	ab	bb
A06	22.779	Block5788	aaxbb	ab	bb	ab	ab	bb	aa	ab	ab	ab	ab	bb	ab	bb	ab	aa	bb	bb	aa	ab	ab	ab	ab	ab	ab	ab	aa	bb	aa	ab	aa	ab	bb	ab	ab	ab	ab	aa	aa	ab	aa	bb	bb	bb	bb	ab	bb
A06	23.029	Block5794	aaxbb	ab	bb	ab	ab	bb	aa	ab	ab	ab	ab	bb	ab	bb	ab	aa	bb	bb	aa	ab	ab	ab	ab	ab	ab	ab	aa	bb	aa	ab	aa	ab	bb	ab	ab	ab	ab	aa	aa	ab	aa	bb	bb	bb	bb	ab	bb
A06	23.029	Block5793	aaxbb	ab	bb	ab	ab	bb	aa	ab	ab	ab	ab	bb	ab	bb	ab	aa	bb	bb	aa	ab	ab	ab	ab	ab	ab	ab	aa	bb	aa	ab	aa	ab	bb	ab	ab	ab	ab	aa	aa	ab	aa	bb	bb	bb	bb	ab	bb
A06	23.279	Block5795	aaxbb	ab	bb	ab	ab	bb	aa	ab	ab	ab	ab	bb	ab	bb	ab	aa	bb	bb	aa	ab	ab	ab	ab	ab	aa	ab	aa	bb	aa	ab	aa	ab	bb	ab	ab	ab	ab	aa	aa	ab	aa	bb	bb	bb	bb	ab	bb
A06	23.529	Block5806	aaxbb	ab	bb	ab	ab	bb	aa	ab	ab	ab	ab	bb	ab	bb	ab	aa	bb	bb	aa	ab	ab	ab	ab	ab	aa	ab	aa	bb	aa	ab	aa	ab	bb	ab	ab	ab	ab	aa	aa	ab	aa	bb	bb	bb	bb	ab	bb
A06	23.529	Block5796	aaxbb	ab	bb	ab	ab	bb	aa	ab	ab	ab	ab	bb	ab	bb	ab	aa	bb	bb	aa	ab	ab	ab	ab	ab	aa	ab	aa	bb	aa	ab	aa	ab	bb	ab	ab	ab	ab	aa	aa	ab	aa	bb	bb	bb	bb	ab	bb
A06	23.779	Block5807	aaxbb	ab	bb	ab	ab	bb	aa	ab	ab	ab	ab	bb	ab	bb	ab	aa	bb	bb	aa	ab	ab	ab	ab	ab	aa	ab	aa	bb	aa	ab	aa	ab	bb	ab	ab	ab	ab	aa	aa	ab	aa	bb	bb	bb	bb	ab	bb
A06	24.029	Block5809	aaxbb	ab	bb	ab	ab	bb	aa	ab	ab	ab	ab	bb	ab	bb	ab	aa	bb	bb	aa	ab	ab	ab	ab	ab	aa	ab	aa	bb	aa	ab	aa	ab	bb	ab	ab	ab	ab	aa	aa	ab	aa	bb	bb	bb	bb	ab	bb
A06	24.279	Block5801	aaxbb	ab	bb	ab	ab	bb	aa	ab	ab	ab	ab	bb	ab	bb	ab	aa	bb	bb	aa	ab	ab	ab	ab	ab	aa	ab	aa	bb	aa	ab	aa	ab	bb	ab	ab	ab	ab	aa	aa	ab	aa	bb	bb	bb	bb	ab	bb
A06	24.779	Block5812	aaxbb	ab	bb	ab	ab	bb	aa	ab	ab	ab	ab	bb	ab	bb	ab	aa	bb	bb	aa	ab	ab	ab	ab	ab	aa	ab	aa	bb	aa	ab	aa	ab	bb	ab	ab	ab	ab	aa	aa	ab	aa	bb	bb	bb	bb	ab	bb
A06	25.279	Block5815	aaxbb	ab	bb	ab	ab	bb	aa	ab	ab	ab	ab	bb	ab	bb	ab	aa	bb	bb	aa	ab	ab	ab	ab	ab	aa	ab	aa	bb	aa	ab	aa	ab	bb	ab	ab	ab	ab	aa	aa	ab	aa	bb	bb	bb	bb	ab	bb
A06	25.279	Block5820	aaxbb	ab	bb	ab	ab	bb	aa	ab	ab	ab	ab	bb	ab	bb	ab	aa	bb	bb	aa	ab	ab	ab	ab	ab	aa	ab	aa	bb	aa	ab	aa	ab	bb	ab	ab	ab	ab	aa	aa	ab	aa	bb	bb	bb	bb	ab	bb
A06	25.779	Block5822	aaxbb	ab	bb	ab	ab	bb	aa	ab	bb	ab	ab	bb	ab	bb	ab	aa	bb	bb	aa	ab	ab	ab	ab	ab	aa	ab	aa	bb	aa	ab	aa	ab	bb	ab	ab	ab	ab	aa	aa	ab	aa	bb	bb	bb	bb	ab	bb
A06	26.029	Block5824	aaxbb	ab	ab	ab	ab	bb	aa	ab	bb	ab	ab	bb	ab	bb	ab	aa	bb	bb	aa	ab	ab	ab	ab	ab	aa	ab	aa	bb	aa	ab	aa	ab	bb	ab	ab	ab	ab	aa	aa	ab	aa	bb	bb	bb	bb	ab	bb
A06	26.529	Block5827	aaxbb	ab	bb	ab	ab	bb	aa	ab	bb	ab	ab	bb	ab	bb	ab	aa	bb	bb	aa	ab	ab	ab	ab	ab	aa	ab	aa	bb	aa	ab	aa	ab	bb	ab	ab	ab	ab	aa	aa	ab	aa	bb	bb	bb	bb	ab	bb
A06	27.029	Block5829	aaxbb	ab	ab	ab	ab	bb	aa	ab	bb	ab	ab	bb	ab	bb	ab	aa	bb	bb	aa	ab	ab	ab	ab	ab	aa	ab	aa	bb	aa	ab	aa	ab	bb	ab	ab	ab	ab	aa	aa	ab	aa	ab	bb	bb	bb	ab	bb
A06	27.279	Block5832	aaxbb	ab	ab	ab	ab	bb	aa	ab	bb	ab	ab	bb	ab	bb	ab	aa	bb	bb	aa	ab	ab	ab	ab	ab	aa	ab	aa	bb	aa	ab	aa	ab	bb	ab	ab	ab	ab	aa	aa	ab	aa	ab	bb	bb	bb	ab	bb
A06	28.78	Block5946	aaxbb	ab	ab	ab	ab	bb	aa	ab	bb	ab	ab	bb	ab	bb	ab	aa	bb	bb	aa	ab	ab	ab	ab	ab	aa	ab	aa	bb	aa	ab	aa	ab	bb	ab	ab	ab	ab	aa	aa	ab	aa	ab	bb	bb	bb	ab	bb
A06	29.03	Block5948	aaxbb	ab	ab	ab	ab	bb	aa	ab	bb	ab	ab	bb	ab	bb	ab	aa	bb	bb	aa	ab	ab	ab	ab	ab	aa	ab	aa	bb	aa	ab	aa	ab	bb	ab	ab	ab	ab	aa	aa	ab	aa	ab	bb	bb	bb	ab	bb
A06	29.03	Block5949	aaxbb	ab	ab	ab	ab	bb	aa	ab	bb	ab	ab	bb	ab	bb	ab	aa	bb	bb	aa	ab	ab	ab	ab	ab	aa	ab	aa	bb	aa	ab	aa	ab	bb	ab	ab	ab	ab	aa	aa	ab	aa	ab	bb	bb	bb	ab	bb
A06	30.53	Block5984	aaxbb	ab	ab	ab	ab	bb	aa	ab	bb	ab	ab	bb	ab	bb	ab	aa	bb	bb	aa	ab	ab	ab	ab	ab	aa	ab	aa	bb	aa	ab	aa	ab	bb	ab	ab	ab	ab	aa	aa	ab	aa	ab	bb	bb	bb	ab	bb
A06	31.28	Block5990	aaxbb	ab	ab	ab	ab	bb	aa	ab	bb	ab	ab	bb	ab	bb	ab	aa	bb	bb	aa	ab	ab	ab	ab	ab	aa	ab	aa	bb	aa	ab	aa	ab	bb	ab	ab	ab	ab	aa	aa	ab	aa	ab	bb	bb	bb	bb	bb
A06	31.28	Block5988	aaxbb	ab	ab	ab	ab	bb	aa	ab	bb	ab	ab	bb	ab	bb	ab	aa	bb	bb	aa	ab	ab	ab	ab	ab	aa	ab	aa	bb	aa	ab	aa	ab	bb	ab	ab	ab	ab	aa	aa	ab	aa	ab	bb	bb	bb	bb	bb
A06	32.03	Block5993	aaxbb	ab	ab	ab	ab	bb	aa	ab	bb	ab	ab	bb	ab	bb	ab	aa	bb	bb	aa	ab	ab	ab	ab	ab	aa	ab	aa	bb	aa	ab	aa	ab	bb	ab	ab	ab	ab	aa	aa	ab	aa	ab	bb	bb	bb	bb	bb
A06	32.28	Block5995	aaxbb	ab	ab	ab	ab	bb	aa	ab	bb	ab	ab	bb	ab	bb	ab	aa	bb	bb	aa	ab	ab	ab	ab	ab	aa	ab	aa	bb	aa	ab	aa	ab	bb	ab	ab	ab	ab	aa	aa	ab	aa	ab	bb	bb	bb	bb	bb
A06	33.03	Block6003	aaxbb	ab	ab	ab	ab	bb	aa	ab	bb	ab	ab	bb	ab	bb	ab	aa	bb	bb	aa	ab	ab	ab	ab	ab	aa	ab	aa	bb	aa	ab	aa	ab	bb	ab	ab	ab	ab	aa	aa	bb	aa	ab	bb	bb	bb	bb	bb
A06	34.581	Block6124	aaxbb	ab	ab	ab	ab	bb	aa	ab	bb	ab	ab	ab	ab	bb	ab	aa	bb	bb	aa	ab	ab	ab	ab	ab	aa	ab	aa	bb	aa	ab	aa	ab	bb	ab	bb	ab	ab	aa	aa	bb	aa	ab	bb	bb	bb	bb	bb
A06	35.331	Block6138	aaxbb	ab	ab	ab	ab	bb	aa	ab	bb	ab	ab	ab	ab	bb	ab	aa	bb	bb	aa	ab	ab	ab	ab	ab	aa	ab	aa	bb	aa	ab	aa	ab	bb	ab	bb	ab	ab	aa	aa	bb	aa	aa	bb	bb	bb	bb	bb
A06	35.581	Block6144	aaxbb	ab	ab	ab	ab	bb	aa	ab	bb	ab	ab	ab	ab	bb	ab	aa	bb	bb	aa	ab	ab	ab	ab	ab	aa	ab	aa	bb	aa	ab	aa	ab	bb	ab	bb	ab	ab	aa	aa	bb	aa	aa	bb	bb	bb	bb	bb
A06	35.581	Block6143	aaxbb	ab	ab	ab	ab	bb	aa	ab	bb	ab	ab	ab	ab	bb	ab	aa	bb	bb	aa	ab	ab	ab	ab	ab	aa	ab	aa	bb	aa	ab	aa	ab	bb	ab	bb	ab	ab	aa	aa	bb	aa	aa	bb	bb	bb	bb	bb
A06	35.831	Block6147	aaxbb	ab	ab	ab	ab	bb	aa	ab	bb	ab	ab	ab	ab	bb	ab	aa	bb	bb	aa	ab	ab	ab	ab	ab	aa	ab	aa	bb	aa	ab	aa	ab	bb	ab	bb	ab	ab	aa	aa	bb	aa	aa	bb	bb	bb	bb	bb
A06	36.331	Block6145	aaxbb	ab	ab	ab	ab	bb	aa	ab	bb	ab	ab	ab	ab	bb	ab	aa	bb	bb	aa	ab	ab	ab	ab	ab	aa	ab	aa	bb	aa	ab	aa	ab	bb	ab	bb	ab	ab	aa	aa	bb	aa	aa	bb	bb	bb	bb	bb
A06	37.331	Block6198	aaxbb	ab	ab	ab	ab	bb	aa	ab	bb	ab	ab	ab	ab	bb	ab	aa	bb	bb	ab	ab	ab	ab	ab	ab	aa	ab	aa	bb	aa	ab	aa	ab	bb	ab	bb	ab	ab	aa	aa	bb	aa	aa	bb	bb	bb	bb	bb
A06	37.331	Block6194	aaxbb	ab	ab	ab	ab	bb	aa	ab	bb	ab	ab	ab	ab	bb	ab	aa	bb	bb	ab	ab	ab	ab	ab	ab	aa	ab	aa	bb	aa	ab	aa	ab	bb	ab	bb	ab	ab	aa	aa	bb	aa	aa	bb	bb	bb	bb	bb
A06	37.581	Block6199	aaxbb	ab	ab	ab	ab	bb	aa	ab	bb	ab	ab	ab	ab	bb	ab	aa	bb	bb	ab	ab	ab	ab	ab	ab	aa	ab	aa	bb	aa	ab	aa	ab	bb	ab	bb	ab	ab	aa	aa	bb	aa	aa	bb	bb	bb	bb	bb
A06	37.831	Block6204	aaxbb	ab	ab	ab	ab	bb	aa	ab	bb	ab	ab	ab	ab	bb	ab	aa	bb	bb	ab	ab	ab	ab	ab	ab	aa	ab	aa	bb	aa	ab	aa	ab	bb	ab	bb	ab	ab	aa	aa	bb	aa	aa	bb	bb	bb	bb	bb
A06	37.831	Block6203	aaxbb	ab	ab	ab	ab	bb	aa	ab	bb	ab	ab	ab	ab	bb	ab	aa	bb	bb	ab	ab	ab	ab	ab	ab	aa	ab	aa	bb	aa	ab	aa	ab	bb	ab	bb	ab	ab	aa	aa	bb	aa	aa	bb	bb	bb	bb	bb
A06	37.831	Block6200	aaxbb	ab	ab	ab	ab	bb	aa	ab	bb	ab	ab	ab	ab	bb	ab	aa	bb	bb	ab	ab	ab	ab	ab	ab	aa	ab	aa	bb	aa	ab	aa	ab	bb	ab	bb	ab	ab	aa	aa	bb	aa	aa	bb	bb	bb	bb	bb
A06	37.831	Block6206	aaxbb	ab	ab	ab	ab	bb	aa	ab	bb	ab	ab	ab	ab	bb	ab	aa	bb	bb	ab	ab	ab	ab	ab	ab	aa	ab	aa	bb	aa	ab	aa	ab	bb	ab	bb	ab	ab	aa	aa	bb	aa	aa	bb	bb	bb	bb	bb
A06	38.081	Block6207	aaxbb	ab	ab	ab	ab	bb	aa	ab	bb	ab	ab	ab	ab	bb	ab	aa	bb	bb	ab	ab	ab	ab	ab	ab	aa	ab	aa	bb	aa	ab	aa	ab	bb	ab	bb	ab	ab	aa	aa	bb	aa	aa	bb	bb	bb	bb	bb
A06	38.081	Block6202	aaxbb	ab	ab	ab	ab	bb	aa	ab	bb	ab	ab	ab	ab	bb	ab	aa	bb	bb	ab	ab	ab	ab	ab	ab	aa	ab	aa	bb	aa	ab	aa	ab	bb	ab	bb	ab	ab	aa	aa	bb	aa	aa	bb	bb	bb	bb	bb
A06	38.081	Block6201	aaxbb	ab	ab	ab	ab	bb	aa	ab	bb	ab	ab	ab	ab	bb	ab	aa	bb	bb	ab	ab	ab	ab	ab	ab	aa	ab	aa	bb	aa	ab	aa	ab	bb	ab	bb	ab	ab	aa	aa	bb	aa	aa	bb	bb	bb	bb	bb
A06	38.581	Block6212	aaxbb	ab	ab	ab	ab	bb	aa	ab	bb	ab	ab	ab	ab	bb	ab	aa	bb	bb	ab	ab	ab	ab	ab	ab	aa	ab	aa	bb	aa	ab	aa	ab	bb	ab	bb	ab	ab	aa	aa	bb	aa	aa	bb	bb	bb	bb	bb
A06	38.831	Block6210	aaxbb	ab	ab	ab	ab	bb	aa	ab	bb	ab	ab	ab	ab	bb	ab	aa	bb	bb	ab	ab	ab	ab	ab	ab	aa	ab	aa	bb	aa	ab	aa	ab	bb	ab	bb	ab	ab	aa	aa	bb	aa	aa	bb	bb	bb	bb	bb
A06	39.081	Block6216	aaxbb	ab	ab	ab	ab	bb	aa	ab	bb	ab	ab	ab	ab	bb	ab	aa	bb	bb	ab	ab	ab	ab	ab	ab	aa	ab	aa	bb	aa	ab	aa	ab	bb	ab	bb	ab	ab	aa	aa	bb	aa	aa	bb	bb	bb	bb	bb
A06	39.081	Block6215	aaxbb	ab	ab	ab	ab	bb	aa	ab	bb	ab	ab	ab	ab	bb	ab	aa	bb	bb	ab	ab	ab	ab	ab	ab	aa	ab	aa	bb	aa	ab	aa	ab	bb	ab	bb	ab	ab	aa	aa	bb	aa	aa	bb	bb	bb	bb	bb
A06	39.081	Block6214	aaxbb	ab	ab	ab	ab	bb	aa	ab	bb	ab	ab	ab	ab	bb	ab	aa	bb	bb	ab	ab	ab	ab	ab	ab	aa	ab	aa	bb	aa	ab	aa	ab	bb	ab	bb	ab	ab	aa	aa	bb	aa	aa	bb	bb	bb	bb	bb
A06	39.331	Block6213	aaxbb	ab	ab	ab	ab	bb	aa	ab	bb	ab	ab	ab	ab	bb	ab	aa	bb	bb	ab	ab	ab	ab	ab	ab	aa	ab	aa	bb	aa	ab	aa	ab	bb	ab	bb	ab	ab	aa	aa	bb	aa	aa	bb	bb	bb	bb	bb
A06	39.581	Block6219	aaxbb	ab	ab	ab	ab	bb	aa	ab	bb	ab	ab	ab	ab	bb	ab	aa	bb	bb	ab	ab	ab	ab	ab	ab	aa	ab	aa	bb	aa	ab	aa	ab	bb	ab	bb	ab	ab	aa	aa	bb	aa	aa	bb	bb	ab	bb	bb
A06	39.581	Block6218	aaxbb	ab	ab	ab	ab	bb	aa	ab	bb	ab	ab	ab	ab	bb	ab	aa	bb	bb	ab	ab	ab	ab	ab	ab	aa	ab	aa	bb	aa	ab	aa	ab	bb	ab	bb	ab	ab	aa	aa	bb	aa	aa	bb	bb	ab	bb	bb
A06	39.831	Block6223	aaxbb	ab	ab	ab	ab	bb	aa	ab	bb	ab	ab	ab	ab	bb	ab	aa	bb	bb	ab	ab	ab	ab	ab	ab	aa	ab	aa	bb	aa	ab	aa	ab	bb	ab	bb	ab	ab	aa	aa	bb	aa	aa	bb	bb	ab	bb	bb
A06	39.831	Block6221	aaxbb	ab	ab	ab	ab	bb	aa	ab	bb	ab	ab	ab	ab	bb	ab	aa	bb	bb	ab	ab	ab	ab	ab	ab	aa	ab	aa	bb	aa	ab	aa	ab	bb	ab	bb	ab	ab	aa	aa	bb	aa	aa	bb	bb	ab	bb	bb
A06	39.831	Block6222	aaxbb	ab	ab	ab	ab	bb	aa	ab	bb	ab	ab	ab	ab	bb	ab	aa	bb	bb	ab	ab	ab	ab	ab	ab	aa	ab	aa	bb	aa	ab	aa	ab	bb	ab	bb	ab	ab	aa	aa	bb	aa	aa	bb	bb	ab	bb	bb
A06	40.081	Block6227	aaxbb	aa	ab	ab	ab	bb	aa	ab	bb	ab	ab	ab	ab	bb	ab	aa	bb	bb	ab	ab	ab	ab	ab	ab	aa	ab	aa	bb	aa	ab	aa	ab	bb	ab	bb	ab	ab	aa	aa	bb	aa	aa	bb	bb	ab	bb	bb
A06	40.331	Block6230	aaxbb	aa	ab	ab	ab	bb	aa	ab	bb	ab	ab	ab	ab	bb	ab	aa	bb	bb	ab	ab	ab	ab	ab	ab	aa	ab	aa	bb	aa	ab	aa	ab	bb	ab	bb	ab	ab	aa	aa	bb	aa	aa	bb	bb	ab	bb	bb
A06	40.331	Block6229	aaxbb	aa	ab	ab	ab	bb	aa	ab	bb	ab	ab	ab	ab	bb	ab	aa	bb	bb	ab	ab	ab	ab	ab	ab	aa	ab	aa	bb	aa	ab	aa	ab	bb	ab	bb	ab	ab	aa	aa	bb	aa	aa	bb	bb	ab	bb	bb
A06	40.331	Block6225	aaxbb	aa	ab	ab	ab	bb	aa	ab	bb	ab	ab	ab	ab	bb	ab	aa	bb	bb	ab	ab	ab	ab	ab	ab	aa	ab	aa	bb	aa	ab	aa	ab	bb	ab	bb	ab	ab	aa	aa	bb	aa	aa	bb	bb	ab	bb	bb
A06	40.581	Block6234	aaxbb	aa	ab	ab	ab	bb	aa	ab	bb	ab	ab	ab	ab	bb	ab	aa	bb	bb	ab	ab	ab	ab	ab	ab	aa	ab	aa	bb	aa	ab	aa	ab	bb	ab	bb	ab	ab	aa	aa	bb	aa	aa	bb	bb	ab	bb	bb
A06	40.581	Block6232	aaxbb	aa	ab	ab	ab	bb	aa	ab	bb	ab	ab	ab	ab	bb	ab	aa	bb	bb	ab	ab	ab	ab	ab	ab	aa	ab	aa	bb	aa	ab	aa	ab	bb	ab	bb	ab	ab	aa	aa	bb	aa	aa	bb	bb	ab	bb	bb
A06	40.831	Block6233	aaxbb	aa	ab	ab	ab	bb	aa	ab	bb	ab	ab	ab	ab	bb	ab	aa	bb	bb	ab	ab	ab	ab	ab	ab	aa	ab	aa	bb	aa	ab	aa	ab	bb	ab	bb	ab	ab	aa	aa	bb	aa	aa	bb	bb	ab	bb	bb
A06	41.081	Block6240	aaxbb	aa	ab	ab	ab	bb	aa	ab	bb	ab	ab	ab	ab	bb	ab	aa	bb	bb	ab	ab	ab	ab	ab	ab	aa	ab	aa	bb	aa	ab	aa	ab	bb	ab	bb	ab	ab	aa	aa	bb	aa	aa	bb	bb	ab	bb	bb
A06	41.331	Block6238	aaxbb	aa	ab	ab	ab	bb	aa	ab	bb	ab	ab	ab	ab	bb	ab	aa	bb	bb	ab	ab	ab	ab	ab	ab	aa	ab	aa	bb	aa	ab	aa	ab	bb	ab	bb	ab	ab	aa	aa	bb	aa	aa	bb	bb	ab	bb	bb
A06	41.331	Block6237	aaxbb	aa	ab	ab	ab	bb	aa	ab	bb	ab	ab	ab	ab	bb	ab	aa	bb	bb	ab	ab	ab	ab	ab	ab	aa	ab	aa	bb	aa	ab	aa	ab	bb	ab	bb	ab	ab	aa	aa	bb	aa	aa	bb	bb	ab	bb	bb
A06	41.831	Block6243	aaxbb	aa	ab	ab	ab	bb	aa	ab	bb	ab	ab	ab	ab	bb	ab	aa	bb	bb	ab	ab	ab	ab	ab	bb	aa	ab	aa	bb	aa	ab	aa	ab	bb	ab	bb	ab	ab	aa	aa	bb	aa	aa	bb	bb	ab	bb	bb
A06	41.831	Block6242	aaxbb	aa	ab	ab	ab	bb	aa	ab	bb	ab	ab	ab	ab	bb	ab	aa	bb	bb	ab	ab	ab	ab	ab	bb	aa	ab	aa	bb	aa	ab	aa	ab	bb	ab	bb	ab	ab	aa	aa	bb	aa	aa	bb	bb	ab	bb	bb
A06	41.831	Block6241	aaxbb	aa	ab	ab	ab	bb	aa	ab	bb	ab	ab	ab	ab	bb	ab	aa	bb	bb	ab	ab	ab	ab	ab	bb	aa	ab	aa	bb	aa	ab	aa	ab	bb	ab	bb	ab	ab	aa	aa	bb	aa	aa	bb	bb	ab	bb	bb
A06	42.081	Block6266	aaxbb	aa	ab	ab	ab	bb	aa	ab	bb	ab	ab	ab	ab	bb	ab	aa	bb	bb	ab	ab	ab	ab	ab	bb	aa	ab	aa	bb	aa	ab	aa	ab	bb	ab	bb	ab	ab	aa	aa	bb	aa	aa	bb	bb	ab	bb	bb
A06	42.081	Block6249	aaxbb	aa	ab	ab	ab	bb	aa	ab	bb	ab	ab	ab	ab	bb	ab	aa	bb	bb	ab	ab	ab	ab	ab	bb	aa	ab	aa	bb	aa	ab	aa	ab	bb	ab	bb	ab	ab	aa	aa	bb	aa	aa	bb	bb	ab	bb	bb
A06	42.081	Block6245	aaxbb	aa	ab	ab	ab	bb	aa	ab	bb	ab	ab	ab	ab	bb	ab	aa	bb	bb	ab	ab	ab	ab	ab	bb	aa	ab	aa	bb	aa	ab	aa	ab	bb	ab	bb	ab	ab	aa	aa	bb	aa	aa	bb	bb	ab	bb	bb
A06	42.081	Block6250	aaxbb	aa	ab	ab	ab	bb	aa	ab	bb	ab	ab	ab	ab	bb	ab	aa	bb	bb	ab	ab	ab	ab	ab	bb	aa	ab	aa	bb	aa	ab	aa	ab	bb	ab	bb	ab	ab	aa	aa	bb	aa	aa	bb	bb	ab	bb	bb
A06	42.081	Block6248	aaxbb	aa	ab	ab	ab	bb	aa	ab	bb	ab	ab	ab	ab	bb	ab	aa	bb	bb	ab	ab	ab	ab	ab	bb	aa	ab	aa	bb	aa	ab	aa	ab	bb	ab	bb	ab	ab	aa	aa	bb	aa	aa	bb	bb	ab	bb	bb
A06	42.081	Block6244	aaxbb	aa	ab	ab	ab	bb	aa	ab	bb	ab	ab	ab	ab	bb	ab	aa	bb	bb	ab	ab	ab	ab	ab	bb	aa	ab	aa	bb	aa	ab	aa	ab	bb	ab	bb	ab	ab	aa	aa	bb	aa	aa	bb	bb	ab	bb	bb
A06	42.331	Block6267	aaxbb	aa	ab	ab	ab	bb	aa	ab	bb	ab	ab	ab	ab	bb	ab	aa	bb	bb	ab	ab	ab	ab	ab	bb	aa	ab	aa	bb	aa	ab	aa	ab	bb	ab	bb	ab	ab	aa	aa	bb	aa	aa	bb	bb	ab	bb	bb
A06	42.581	Block6269	aaxbb	aa	ab	ab	ab	bb	aa	ab	bb	ab	ab	ab	ab	bb	ab	aa	bb	bb	ab	ab	ab	ab	ab	bb	aa	ab	aa	bb	aa	ab	aa	ab	bb	ab	bb	ab	ab	aa	aa	bb	aa	aa	bb	bb	ab	bb	bb
A06	42.581	Block6268	aaxbb	aa	ab	ab	ab	bb	aa	ab	bb	ab	ab	ab	ab	bb	ab	aa	bb	bb	ab	ab	ab	ab	ab	bb	aa	ab	aa	bb	aa	ab	aa	ab	bb	ab	bb	ab	ab	aa	aa	bb	aa	aa	bb	bb	ab	bb	bb
A06	42.831	Block6283	aaxbb	aa	ab	ab	ab	bb	aa	ab	bb	ab	ab	ab	ab	bb	ab	aa	bb	bb	ab	ab	ab	ab	ab	bb	aa	ab	aa	bb	aa	ab	aa	ab	bb	ab	bb	ab	ab	aa	aa	bb	aa	aa	bb	bb	ab	bb	bb
A06	42.831	Block6282	aaxbb	aa	ab	ab	ab	bb	aa	ab	bb	ab	ab	ab	ab	bb	ab	aa	bb	bb	ab	ab	ab	ab	ab	bb	aa	ab	aa	bb	aa	ab	aa	ab	bb	ab	bb	ab	ab	aa	aa	bb	aa	aa	bb	bb	ab	bb	bb
A06	43.081	Block6286	aaxbb	aa	ab	ab	ab	bb	aa	ab	bb	ab	ab	ab	ab	bb	ab	aa	bb	bb	ab	ab	ab	ab	ab	bb	aa	ab	aa	bb	aa	ab	aa	ab	bb	ab	bb	ab	ab	aa	aa	bb	aa	aa	bb	bb	ab	bb	bb
A06	43.331	Block6287	aaxbb	aa	ab	ab	ab	bb	aa	ab	bb	ab	ab	ab	ab	bb	ab	aa	bb	bb	ab	ab	ab	ab	ab	bb	aa	ab	aa	bb	aa	ab	aa	ab	bb	ab	bb	ab	ab	aa	aa	bb	aa	aa	bb	bb	ab	bb	bb
A06	43.331	Block6285	aaxbb	aa	ab	ab	ab	bb	aa	ab	bb	ab	ab	ab	ab	bb	ab	aa	bb	bb	ab	ab	ab	ab	ab	bb	aa	ab	aa	bb	aa	ab	aa	ab	bb	ab	bb	ab	ab	aa	aa	bb	aa	aa	bb	bb	ab	bb	bb
A06	43.331	Block6272	aaxbb	aa	ab	ab	ab	bb	aa	ab	bb	ab	ab	ab	ab	bb	ab	aa	bb	bb	ab	ab	ab	ab	ab	bb	aa	ab	aa	bb	aa	ab	aa	ab	bb	ab	bb	ab	ab	aa	aa	bb	aa	aa	bb	bb	ab	bb	bb
A06	43.581	Block6288	aaxbb	aa	ab	ab	ab	bb	aa	ab	bb	ab	ab	ab	ab	bb	ab	aa	bb	bb	ab	ab	ab	ab	ab	bb	aa	ab	aa	bb	aa	ab	aa	ab	bb	ab	bb	ab	ab	aa	aa	bb	aa	aa	bb	bb	ab	bb	bb
A06	43.831	Block6289	aaxbb	aa	ab	ab	ab	bb	aa	ab	bb	ab	ab	ab	ab	bb	ab	aa	bb	bb	ab	ab	ab	ab	ab	bb	aa	ab	aa	bb	aa	ab	aa	ab	bb	ab	bb	ab	ab	aa	aa	bb	aa	aa	bb	bb	ab	bb	bb
A06	44.081	Block6296	aaxbb	aa	ab	ab	ab	bb	aa	ab	bb	ab	ab	ab	ab	bb	ab	aa	bb	bb	ab	ab	ab	ab	ab	bb	aa	ab	aa	bb	aa	ab	aa	ab	bb	ab	bb	ab	ab	aa	aa	ab	aa	aa	bb	bb	ab	bb	bb
A06	44.081	Block6290	aaxbb	aa	ab	ab	ab	bb	aa	ab	bb	ab	ab	ab	ab	bb	ab	aa	bb	bb	ab	ab	ab	ab	ab	bb	aa	ab	aa	bb	aa	ab	aa	ab	bb	ab	bb	ab	ab	aa	aa	ab	aa	aa	bb	bb	ab	bb	bb
A06	44.331	Block6293	aaxbb	aa	ab	ab	ab	bb	aa	ab	bb	ab	ab	ab	ab	bb	ab	aa	bb	bb	ab	ab	ab	ab	ab	bb	aa	ab	aa	bb	aa	ab	aa	ab	bb	ab	bb	ab	ab	aa	aa	ab	aa	aa	bb	bb	ab	bb	bb
A06	44.581	Block6294	aaxbb	aa	ab	ab	ab	bb	aa	ab	bb	ab	ab	ab	ab	bb	ab	aa	bb	bb	ab	ab	ab	ab	ab	bb	aa	ab	aa	bb	aa	ab	aa	ab	bb	ab	bb	ab	ab	aa	aa	ab	aa	aa	bb	bb	ab	bb	bb
A06	44.831	Block6291	aaxbb	aa	ab	ab	ab	bb	aa	ab	bb	ab	ab	ab	ab	bb	ab	aa	bb	bb	ab	ab	ab	ab	ab	bb	aa	ab	aa	bb	aa	ab	aa	ab	bb	ab	bb	ab	ab	aa	aa	ab	aa	aa	bb	bb	ab	bb	bb
A06	45.081	Block6302	aaxbb	aa	ab	ab	ab	bb	aa	ab	bb	ab	ab	ab	ab	bb	ab	aa	bb	bb	ab	ab	ab	ab	ab	bb	aa	ab	ab	bb	aa	ab	aa	ab	bb	ab	bb	ab	ab	aa	aa	ab	aa	aa	bb	bb	ab	bb	bb
A06	45.081	Block6298	aaxbb	aa	ab	ab	ab	bb	aa	ab	bb	ab	ab	ab	ab	bb	ab	aa	bb	bb	ab	ab	ab	ab	ab	bb	aa	ab	ab	bb	aa	ab	aa	ab	bb	ab	bb	ab	ab	aa	aa	ab	aa	aa	bb	bb	ab	bb	bb
A06	45.331	Block6297	aaxbb	aa	ab	ab	ab	bb	aa	ab	bb	ab	ab	ab	ab	bb	ab	aa	bb	bb	ab	ab	ab	ab	ab	bb	aa	ab	ab	bb	aa	ab	aa	ab	bb	ab	bb	ab	ab	aa	aa	ab	aa	aa	bb	bb	ab	bb	bb
A06	45.581	Block6300	aaxbb	aa	ab	ab	ab	bb	aa	ab	bb	ab	ab	ab	ab	bb	ab	aa	bb	bb	ab	ab	ab	ab	ab	bb	aa	ab	ab	bb	aa	ab	aa	ab	bb	ab	bb	ab	ab	aa	aa	ab	aa	aa	bb	bb	ab	bb	bb
A06	45.831	Block6301	aaxbb	aa	ab	ab	ab	bb	aa	ab	bb	ab	ab	ab	ab	bb	ab	aa	bb	bb	ab	ab	ab	ab	ab	bb	aa	ab	ab	bb	aa	ab	aa	ab	bb	ab	bb	ab	ab	aa	aa	ab	aa	aa	bb	bb	ab	bb	bb
A06	46.331	Block6304	aaxbb	aa	ab	ab	ab	bb	aa	ab	bb	ab	ab	ab	ab	bb	ab	ab	bb	bb	ab	ab	ab	ab	ab	bb	aa	ab	ab	bb	aa	ab	aa	ab	bb	ab	bb	ab	ab	aa	aa	ab	aa	aa	bb	bb	ab	bb	bb
A06	46.331	Block6303	aaxbb	aa	ab	ab	ab	bb	aa	ab	bb	ab	ab	ab	ab	bb	ab	ab	bb	bb	ab	ab	ab	ab	ab	bb	aa	ab	ab	bb	aa	ab	aa	ab	bb	ab	bb	ab	ab	aa	aa	ab	aa	aa	bb	bb	ab	bb	bb
A06	46.581	Block6305	aaxbb	aa	ab	ab	ab	bb	aa	ab	bb	ab	ab	ab	ab	bb	ab	ab	bb	bb	ab	ab	ab	ab	ab	bb	aa	ab	ab	bb	aa	ab	aa	ab	bb	ab	bb	ab	ab	aa	aa	ab	aa	aa	bb	bb	ab	bb	bb
A06	46.831	Block6306	aaxbb	aa	ab	ab	ab	bb	aa	ab	bb	ab	ab	ab	ab	bb	ab	ab	bb	bb	ab	ab	ab	ab	ab	bb	aa	ab	ab	bb	aa	ab	aa	ab	bb	ab	bb	ab	ab	aa	aa	ab	aa	aa	bb	bb	ab	bb	bb
A06	46.831	Block6313	aaxbb	aa	ab	ab	ab	bb	aa	ab	bb	ab	ab	ab	ab	bb	ab	ab	bb	bb	ab	ab	ab	ab	ab	bb	aa	ab	ab	bb	aa	ab	aa	ab	bb	ab	bb	ab	ab	aa	aa	ab	aa	aa	bb	bb	ab	bb	bb
A06	46.831	Block6311	aaxbb	aa	ab	ab	ab	bb	aa	ab	bb	ab	ab	ab	ab	bb	ab	ab	bb	bb	ab	ab	ab	ab	ab	bb	aa	ab	ab	bb	aa	ab	aa	ab	bb	ab	bb	ab	ab	aa	aa	ab	aa	aa	bb	bb	ab	bb	bb
A06	46.831	Block6307	aaxbb	aa	ab	ab	ab	bb	aa	ab	bb	ab	ab	ab	ab	bb	ab	ab	bb	bb	ab	ab	ab	ab	ab	bb	aa	ab	ab	bb	aa	ab	aa	ab	bb	ab	bb	ab	ab	aa	aa	ab	aa	aa	bb	bb	ab	bb	bb
A06	47.081	Block6314	aaxbb	aa	ab	ab	ab	bb	aa	ab	bb	ab	ab	ab	ab	bb	ab	ab	bb	bb	ab	ab	ab	ab	ab	bb	aa	ab	ab	bb	aa	ab	aa	ab	bb	ab	bb	ab	ab	aa	aa	ab	aa	aa	bb	bb	ab	bb	bb
A06	47.081	Block6310	aaxbb	aa	ab	ab	ab	bb	aa	ab	bb	ab	ab	ab	ab	bb	ab	ab	bb	bb	ab	ab	ab	ab	ab	bb	aa	ab	ab	bb	aa	ab	aa	ab	bb	ab	bb	ab	ab	aa	aa	ab	aa	aa	bb	bb	ab	bb	bb
A06	47.081	Block6308	aaxbb	aa	ab	ab	ab	bb	aa	ab	bb	ab	ab	ab	ab	bb	ab	ab	bb	bb	ab	ab	ab	ab	ab	bb	aa	ab	ab	bb	aa	ab	aa	ab	bb	ab	bb	ab	ab	aa	aa	ab	aa	aa	bb	bb	ab	bb	bb
A06	47.331	Block6315	aaxbb	aa	ab	ab	ab	bb	aa	ab	bb	ab	ab	ab	ab	bb	ab	ab	bb	bb	ab	ab	ab	ab	ab	bb	aa	ab	ab	bb	aa	ab	aa	ab	bb	ab	bb	ab	ab	aa	aa	ab	aa	aa	bb	bb	ab	bb	bb
A06	47.331	Block6316	aaxbb	aa	ab	ab	ab	bb	aa	ab	bb	ab	ab	ab	ab	bb	ab	ab	bb	bb	ab	ab	ab	ab	ab	bb	aa	ab	ab	bb	aa	ab	aa	ab	bb	ab	bb	ab	ab	aa	aa	ab	aa	aa	bb	bb	ab	bb	bb
A06	47.831	Block6319	aaxbb	aa	ab	ab	ab	bb	aa	ab	bb	ab	ab	ab	ab	bb	ab	ab	bb	bb	ab	ab	ab	ab	ab	bb	aa	ab	ab	bb	aa	ab	aa	ab	bb	ab	bb	ab	ab	aa	aa	ab	aa	aa	bb	bb	ab	bb	bb
A06	48.081	Block6320	aaxbb	aa	ab	ab	ab	bb	aa	ab	bb	aa	ab	ab	ab	bb	ab	ab	bb	bb	ab	ab	ab	ab	ab	bb	aa	ab	ab	bb	aa	ab	aa	ab	bb	ab	bb	ab	ab	aa	aa	ab	aa	aa	bb	bb	ab	bb	bb
A06	48.081	Block6321	aaxbb	aa	ab	ab	ab	bb	aa	ab	bb	aa	ab	ab	ab	bb	ab	ab	bb	bb	ab	ab	ab	ab	ab	bb	aa	ab	ab	bb	aa	ab	aa	ab	bb	ab	bb	ab	ab	aa	aa	ab	aa	aa	bb	bb	ab	bb	bb
A06	48.331	Block6322	aaxbb	aa	ab	ab	ab	bb	aa	ab	bb	aa	ab	ab	ab	bb	ab	ab	bb	bb	ab	ab	ab	ab	ab	bb	aa	ab	ab	bb	aa	ab	aa	ab	bb	ab	bb	ab	ab	aa	aa	ab	aa	aa	bb	bb	ab	bb	bb
A06	48.581	Block6325	aaxbb	aa	ab	ab	ab	bb	aa	aa	bb	aa	ab	ab	ab	bb	ab	ab	bb	bb	ab	ab	ab	ab	ab	bb	aa	ab	ab	bb	aa	ab	aa	ab	bb	ab	bb	ab	ab	aa	aa	ab	aa	aa	bb	bb	ab	bb	bb
A06	48.581	Block6324	aaxbb	aa	ab	ab	ab	bb	aa	aa	bb	aa	ab	ab	ab	bb	ab	ab	bb	bb	ab	ab	ab	ab	ab	bb	aa	ab	ab	bb	aa	ab	aa	ab	bb	ab	bb	ab	ab	aa	aa	ab	aa	aa	bb	bb	ab	bb	bb
A06	48.831	Block6329	aaxbb	aa	ab	ab	ab	bb	ab	aa	bb	aa	ab	ab	ab	bb	ab	ab	bb	bb	ab	ab	ab	ab	ab	bb	aa	ab	ab	bb	aa	ab	aa	ab	bb	ab	bb	ab	ab	aa	aa	ab	aa	aa	bb	bb	ab	bb	bb
A06	48.831	Block6328	aaxbb	aa	ab	ab	ab	bb	ab	aa	bb	aa	ab	ab	ab	bb	ab	ab	bb	bb	ab	ab	ab	ab	ab	bb	aa	ab	ab	bb	aa	ab	aa	ab	bb	ab	bb	ab	ab	aa	aa	ab	aa	aa	bb	bb	ab	bb	bb
A06	48.831	Block6327	aaxbb	aa	ab	ab	ab	bb	ab	aa	bb	aa	ab	ab	ab	bb	ab	ab	bb	bb	ab	ab	ab	ab	ab	bb	aa	ab	ab	bb	aa	ab	aa	ab	bb	ab	bb	ab	ab	aa	aa	ab	aa	aa	bb	bb	ab	bb	bb
A06	49.081	Block6330	aaxbb	aa	ab	ab	ab	bb	ab	aa	ab	aa	ab	ab	ab	bb	ab	ab	bb	bb	ab	ab	ab	ab	ab	bb	aa	ab	ab	bb	aa	ab	aa	ab	bb	ab	bb	ab	ab	aa	aa	ab	aa	aa	bb	bb	ab	bb	bb
A06	49.081	Block6333	aaxbb	aa	ab	ab	ab	bb	ab	aa	ab	aa	ab	ab	ab	bb	ab	ab	bb	bb	ab	ab	ab	ab	ab	bb	aa	ab	ab	bb	aa	ab	aa	ab	bb	ab	bb	ab	ab	aa	aa	ab	aa	aa	bb	bb	ab	bb	bb
A06	49.331	Block6336	aaxbb	aa	ab	ab	ab	bb	ab	aa	ab	aa	ab	ab	ab	bb	ab	ab	bb	bb	ab	ab	ab	ab	ab	bb	aa	ab	ab	bb	aa	ab	aa	ab	bb	ab	bb	ab	ab	aa	aa	ab	aa	aa	bb	bb	ab	bb	bb
A06	49.331	Block6335	aaxbb	aa	ab	ab	ab	bb	ab	aa	ab	aa	ab	ab	ab	bb	ab	ab	bb	bb	ab	ab	ab	ab	ab	bb	aa	ab	ab	bb	aa	ab	aa	ab	bb	ab	bb	ab	ab	aa	aa	ab	aa	aa	bb	bb	ab	bb	bb
A06	49.331	Block6337	aaxbb	aa	ab	ab	ab	bb	ab	aa	ab	aa	ab	ab	ab	bb	ab	ab	bb	bb	ab	ab	ab	ab	ab	bb	aa	ab	ab	bb	aa	ab	aa	ab	bb	ab	bb	ab	ab	aa	aa	ab	aa	aa	bb	bb	ab	bb	bb
A06	49.331	Block6340	aaxbb	aa	ab	ab	ab	bb	ab	aa	ab	aa	ab	ab	ab	bb	ab	ab	bb	bb	ab	ab	ab	ab	ab	bb	aa	ab	ab	bb	aa	ab	aa	ab	bb	ab	bb	ab	ab	aa	aa	ab	aa	aa	bb	bb	ab	bb	bb
A06	49.581	Block6351	aaxbb	aa	ab	ab	ab	bb	ab	aa	ab	aa	ab	ab	ab	bb	ab	ab	bb	bb	ab	ab	ab	ab	ab	bb	aa	ab	ab	bb	aa	ab	aa	ab	bb	ab	bb	ab	ab	aa	aa	ab	aa	aa	bb	bb	ab	bb	bb
A06	49.581	Block6349	aaxbb	aa	ab	ab	ab	bb	ab	aa	ab	aa	ab	ab	ab	bb	ab	ab	bb	bb	ab	ab	ab	ab	ab	bb	aa	ab	ab	bb	aa	ab	aa	ab	bb	ab	bb	ab	ab	aa	aa	ab	aa	aa	bb	bb	ab	bb	bb
A06	49.581	Block6341	aaxbb	aa	ab	ab	ab	bb	ab	aa	ab	aa	ab	ab	ab	bb	ab	ab	bb	bb	ab	ab	ab	ab	ab	bb	aa	ab	ab	bb	aa	ab	aa	ab	bb	ab	bb	ab	ab	aa	aa	ab	aa	aa	bb	bb	ab	bb	bb
A06	49.581	Block6343	aaxbb	aa	ab	ab	ab	bb	ab	aa	ab	aa	ab	ab	ab	bb	ab	ab	bb	bb	ab	ab	ab	ab	ab	bb	aa	ab	ab	bb	aa	ab	aa	ab	bb	ab	bb	ab	ab	aa	aa	ab	aa	aa	bb	bb	ab	bb	bb
A06	49.581	Block6350	aaxbb	aa	ab	ab	ab	bb	ab	aa	ab	aa	ab	ab	ab	bb	ab	ab	bb	bb	ab	ab	ab	ab	ab	bb	aa	ab	ab	bb	aa	ab	aa	ab	bb	ab	bb	ab	ab	aa	aa	ab	aa	aa	bb	bb	ab	bb	bb
A06	49.581	Block6348	aaxbb	aa	ab	ab	ab	bb	ab	aa	ab	aa	ab	ab	ab	bb	ab	ab	bb	bb	ab	ab	ab	ab	ab	bb	aa	ab	ab	bb	aa	ab	aa	ab	bb	ab	bb	ab	ab	aa	aa	ab	aa	aa	bb	bb	ab	bb	bb
A06	49.581	Block6342	aaxbb	aa	ab	ab	ab	bb	ab	aa	ab	aa	ab	ab	ab	bb	ab	ab	bb	bb	ab	ab	ab	ab	ab	bb	aa	ab	ab	bb	aa	ab	aa	ab	bb	ab	bb	ab	ab	aa	aa	ab	aa	aa	bb	bb	ab	bb	bb
A06	50.081	Block6372	aaxbb	aa	ab	ab	ab	bb	ab	aa	ab	aa	ab	ab	ab	bb	ab	ab	bb	bb	ab	ab	ab	ab	ab	bb	aa	ab	ab	bb	aa	ab	aa	ab	bb	ab	bb	ab	ab	aa	aa	ab	aa	aa	bb	bb	ab	bb	bb
A06	50.081	Block6370	aaxbb	aa	ab	ab	ab	bb	ab	aa	ab	aa	ab	ab	ab	bb	ab	ab	bb	bb	ab	ab	ab	ab	ab	bb	aa	ab	ab	bb	aa	ab	aa	ab	bb	ab	bb	ab	ab	aa	aa	ab	aa	aa	bb	bb	ab	bb	bb
A06	50.081	Block6358	aaxbb	aa	ab	ab	ab	bb	ab	aa	ab	aa	ab	ab	ab	bb	ab	ab	bb	bb	ab	ab	ab	ab	ab	bb	aa	ab	ab	bb	aa	ab	aa	ab	bb	ab	bb	ab	ab	aa	aa	ab	aa	aa	bb	bb	ab	bb	bb
A06	50.081	Block6354	aaxbb	aa	ab	ab	ab	bb	ab	aa	ab	aa	ab	ab	ab	bb	ab	ab	bb	bb	ab	ab	ab	ab	ab	bb	aa	ab	ab	bb	aa	ab	aa	ab	bb	ab	bb	ab	ab	aa	aa	ab	aa	aa	bb	bb	ab	bb	bb
A06	50.081	Block6366	aaxbb	aa	ab	ab	ab	bb	ab	aa	ab	aa	ab	ab	ab	bb	ab	ab	bb	bb	ab	ab	ab	ab	ab	bb	aa	ab	ab	bb	aa	ab	aa	ab	bb	ab	bb	ab	ab	aa	aa	ab	aa	aa	bb	bb	ab	bb	bb
A06	50.081	Block6362	aaxbb	aa	ab	ab	ab	bb	ab	aa	ab	aa	ab	ab	ab	bb	ab	ab	bb	bb	ab	ab	ab	ab	ab	bb	aa	ab	ab	bb	aa	ab	aa	ab	bb	ab	bb	ab	ab	aa	aa	ab	aa	aa	bb	bb	ab	bb	bb
A06	50.081	Block6361	aaxbb	aa	ab	ab	ab	bb	ab	aa	ab	aa	ab	ab	ab	bb	ab	ab	bb	bb	ab	ab	ab	ab	ab	bb	aa	ab	ab	bb	aa	ab	aa	ab	bb	ab	bb	ab	ab	aa	aa	ab	aa	aa	bb	bb	ab	bb	bb
A06	50.081	Block6369	aaxbb	aa	ab	ab	ab	bb	ab	aa	ab	aa	ab	ab	ab	bb	ab	ab	bb	bb	ab	ab	ab	ab	ab	bb	aa	ab	ab	bb	aa	ab	aa	ab	bb	ab	bb	ab	ab	aa	aa	ab	aa	aa	bb	bb	ab	bb	bb
A06	50.081	Block6359	aaxbb	aa	ab	ab	ab	bb	ab	aa	ab	aa	ab	ab	ab	bb	ab	ab	bb	bb	ab	ab	ab	ab	ab	bb	aa	ab	ab	bb	aa	ab	aa	ab	bb	ab	bb	ab	ab	aa	aa	ab	aa	aa	bb	bb	ab	bb	bb
A06	50.081	Block6357	aaxbb	aa	ab	ab	ab	bb	ab	aa	ab	aa	ab	ab	ab	bb	ab	ab	bb	bb	ab	ab	ab	ab	ab	bb	aa	ab	ab	bb	aa	ab	aa	ab	bb	ab	bb	ab	ab	aa	aa	ab	aa	aa	bb	bb	ab	bb	bb
A06	50.331	Block6373	aaxbb	aa	ab	ab	ab	bb	ab	aa	ab	aa	ab	ab	ab	bb	ab	ab	bb	bb	ab	ab	ab	ab	ab	bb	aa	ab	ab	bb	aa	ab	aa	ab	bb	ab	bb	ab	ab	aa	aa	ab	aa	aa	bb	bb	ab	bb	bb
A06	50.831	Block6378	aaxbb	aa	ab	ab	ab	bb	ab	aa	ab	aa	ab	ab	ab	bb	ab	ab	bb	bb	ab	ab	ab	ab	ab	bb	aa	ab	ab	bb	aa	ab	aa	ab	bb	ab	bb	ab	ab	aa	aa	ab	aa	aa	bb	bb	ab	bb	bb
A06	50.831	Block6379	aaxbb	aa	ab	ab	ab	bb	ab	aa	ab	aa	ab	ab	ab	bb	ab	ab	bb	bb	ab	ab	ab	ab	ab	bb	aa	ab	ab	bb	aa	ab	aa	ab	bb	ab	bb	ab	ab	aa	aa	ab	aa	aa	bb	bb	ab	bb	bb
A06	50.831	Block6377	aaxbb	aa	ab	ab	ab	bb	ab	aa	ab	aa	ab	ab	ab	bb	ab	ab	bb	bb	ab	ab	ab	ab	ab	bb	aa	ab	ab	bb	aa	ab	aa	ab	bb	ab	bb	ab	ab	aa	aa	ab	aa	aa	bb	bb	ab	bb	bb
A06	51.331	Block6381	aaxbb	aa	ab	ab	ab	bb	ab	aa	ab	aa	ab	ab	ab	bb	ab	ab	bb	bb	ab	ab	ab	ab	ab	bb	aa	ab	ab	bb	aa	ab	aa	ab	bb	ab	bb	ab	ab	aa	aa	ab	aa	aa	bb	bb	ab	bb	bb
A06	51.331	Block6384	aaxbb	aa	ab	ab	ab	bb	ab	aa	ab	aa	ab	ab	ab	bb	ab	ab	bb	bb	ab	ab	ab	ab	ab	bb	aa	ab	ab	bb	aa	ab	aa	ab	bb	ab	bb	ab	ab	aa	aa	ab	aa	aa	bb	bb	ab	bb	bb
A06	51.581	Block6397	aaxbb	aa	ab	ab	ab	bb	ab	aa	ab	aa	ab	ab	ab	bb	ab	ab	bb	bb	ab	ab	ab	ab	ab	bb	aa	ab	ab	bb	aa	ab	aa	ab	bb	ab	bb	ab	ab	aa	aa	ab	aa	aa	bb	bb	ab	bb	bb
A06	51.581	Block6407	aaxbb	aa	ab	ab	ab	bb	ab	aa	ab	aa	ab	ab	ab	bb	ab	ab	bb	bb	ab	ab	ab	ab	ab	bb	aa	ab	ab	bb	aa	ab	aa	ab	bb	ab	bb	ab	ab	aa	aa	ab	aa	aa	bb	bb	ab	bb	bb
A06	51.581	Block6403	aaxbb	aa	ab	ab	ab	bb	ab	aa	ab	aa	ab	ab	ab	bb	ab	ab	bb	bb	ab	ab	ab	ab	ab	bb	aa	ab	ab	bb	aa	ab	aa	ab	bb	ab	bb	ab	ab	aa	aa	ab	aa	aa	bb	bb	ab	bb	bb
A06	51.581	Block6399	aaxbb	aa	ab	ab	ab	bb	ab	aa	ab	aa	ab	ab	ab	bb	ab	ab	bb	bb	ab	ab	ab	ab	ab	bb	aa	ab	ab	bb	aa	ab	aa	ab	bb	ab	bb	ab	ab	aa	aa	ab	aa	aa	bb	bb	ab	bb	bb
A06	51.581	Block6386	aaxbb	aa	ab	ab	ab	bb	ab	aa	ab	aa	ab	ab	ab	bb	ab	ab	bb	bb	ab	ab	ab	ab	ab	bb	aa	ab	ab	bb	aa	ab	aa	ab	bb	ab	bb	ab	ab	aa	aa	ab	aa	aa	bb	bb	ab	bb	bb
A06	51.581	Block6404	aaxbb	aa	ab	ab	ab	bb	ab	aa	ab	aa	ab	ab	ab	bb	ab	ab	bb	bb	ab	ab	ab	ab	ab	bb	aa	ab	ab	bb	aa	ab	aa	ab	bb	ab	bb	ab	ab	aa	aa	ab	aa	aa	bb	bb	ab	bb	bb
A06	51.581	Block6418	aaxbb	aa	ab	ab	ab	bb	ab	aa	ab	aa	ab	ab	ab	bb	ab	ab	bb	bb	ab	ab	ab	ab	ab	bb	aa	ab	ab	bb	aa	ab	aa	ab	bb	ab	bb	ab	ab	aa	aa	ab	aa	aa	bb	bb	ab	bb	bb
A06	51.831	Block6410	aaxbb	aa	ab	ab	ab	bb	ab	aa	ab	aa	ab	ab	ab	bb	ab	ab	bb	bb	ab	ab	ab	ab	ab	bb	aa	ab	ab	bb	aa	ab	aa	ab	bb	ab	bb	ab	ab	aa	aa	ab	aa	aa	bb	bb	ab	bb	bb
A06	51.831	Block6406	aaxbb	aa	ab	ab	ab	bb	ab	aa	ab	aa	ab	ab	ab	bb	ab	ab	bb	bb	ab	ab	ab	ab	ab	bb	aa	ab	ab	bb	aa	ab	aa	ab	bb	ab	bb	ab	ab	aa	aa	ab	aa	aa	bb	bb	ab	bb	bb
A06	52.331	Block6423	aaxbb	aa	ab	ab	ab	bb	ab	aa	ab	aa	ab	ab	ab	bb	ab	ab	bb	bb	ab	ab	ab	ab	ab	bb	aa	aa	ab	bb	aa	ab	aa	ab	bb	ab	bb	ab	ab	aa	aa	ab	aa	aa	bb	bb	ab	bb	bb
A06	52.331	Block6421	aaxbb	aa	ab	ab	ab	bb	ab	aa	ab	aa	ab	ab	ab	bb	ab	ab	bb	bb	ab	ab	ab	ab	ab	bb	aa	aa	ab	bb	aa	ab	aa	ab	bb	ab	bb	ab	ab	aa	aa	ab	aa	aa	bb	bb	ab	bb	bb
A06	52.581	Block6424	aaxbb	aa	ab	ab	ab	bb	ab	aa	ab	aa	ab	ab	ab	bb	ab	ab	bb	bb	ab	ab	ab	ab	ab	bb	aa	aa	ab	bb	aa	ab	aa	ab	bb	ab	bb	ab	ab	aa	aa	ab	aa	aa	bb	bb	ab	bb	bb
A06	52.581	Block6425	aaxbb	aa	ab	ab	ab	bb	ab	aa	ab	aa	ab	ab	ab	bb	ab	ab	bb	bb	ab	ab	ab	ab	ab	bb	aa	aa	ab	bb	aa	ab	aa	ab	bb	ab	bb	ab	ab	aa	aa	ab	aa	aa	bb	bb	ab	bb	bb
A06	52.831	Block6426	aaxbb	aa	ab	ab	ab	bb	ab	aa	ab	aa	ab	ab	ab	bb	ab	ab	bb	bb	ab	ab	ab	ab	ab	bb	aa	aa	ab	bb	aa	ab	aa	ab	bb	ab	bb	ab	ab	aa	aa	ab	aa	aa	bb	bb	ab	bb	bb
A06	53.331	Block6429	aaxbb	aa	ab	ab	ab	bb	ab	aa	ab	aa	ab	ab	ab	bb	ab	ab	bb	bb	ab	ab	ab	ab	ab	bb	aa	aa	ab	bb	aa	ab	aa	ab	bb	ab	bb	ab	ab	aa	aa	ab	aa	aa	bb	bb	ab	bb	bb
A06	53.831	Block6431	aaxbb	aa	ab	ab	ab	bb	ab	aa	ab	aa	ab	ab	ab	bb	ab	ab	bb	bb	ab	ab	ab	ab	ab	bb	aa	aa	ab	bb	aa	ab	aa	ab	bb	ab	bb	ab	ab	aa	aa	ab	aa	aa	bb	bb	ab	bb	bb
A06	54.331	Block6433	aaxbb	aa	ab	ab	ab	bb	ab	aa	ab	aa	ab	ab	ab	bb	ab	ab	bb	bb	ab	ab	ab	ab	ab	bb	aa	aa	ab	bb	aa	ab	aa	ab	bb	ab	bb	ab	ab	aa	aa	ab	aa	aa	bb	bb	ab	bb	bb
A06	54.581	Block6436	aaxbb	aa	ab	ab	ab	bb	ab	aa	ab	aa	ab	ab	ab	bb	ab	ab	bb	bb	ab	ab	ab	ab	ab	bb	aa	aa	ab	bb	aa	ab	aa	ab	bb	ab	bb	ab	ab	aa	aa	ab	aa	aa	bb	bb	ab	bb	bb
A06	54.581	Block6435	aaxbb	aa	ab	ab	ab	bb	ab	aa	ab	aa	ab	ab	ab	bb	ab	ab	bb	bb	ab	ab	ab	ab	ab	bb	aa	aa	ab	bb	aa	ab	aa	ab	bb	ab	bb	ab	ab	aa	aa	ab	aa	aa	bb	bb	ab	bb	bb
A06	54.831	Block6437	aaxbb	aa	ab	ab	ab	bb	ab	aa	ab	aa	ab	ab	ab	bb	ab	ab	bb	bb	ab	ab	ab	ab	ab	bb	aa	aa	ab	bb	aa	ab	aa	ab	bb	ab	bb	ab	ab	aa	aa	ab	aa	aa	bb	bb	ab	bb	bb
A06	55.081	Block6440	aaxbb	aa	ab	ab	ab	bb	ab	aa	ab	aa	ab	ab	ab	bb	ab	ab	bb	bb	ab	ab	ab	ab	ab	bb	aa	aa	ab	bb	aa	ab	aa	ab	bb	ab	bb	ab	ab	aa	aa	ab	aa	aa	bb	bb	ab	bb	bb
A06	55.331	Block6443	aaxbb	aa	ab	ab	ab	bb	ab	aa	ab	aa	ab	ab	ab	bb	ab	ab	bb	bb	ab	ab	ab	ab	ab	bb	aa	aa	ab	bb	aa	ab	aa	ab	bb	ab	bb	ab	ab	aa	aa	ab	aa	aa	bb	bb	ab	bb	bb
A06	55.331	Block6441	aaxbb	aa	ab	ab	ab	bb	ab	aa	ab	aa	ab	ab	ab	bb	ab	ab	bb	bb	ab	ab	ab	ab	ab	bb	aa	aa	ab	bb	aa	ab	aa	ab	bb	ab	bb	ab	ab	aa	aa	ab	aa	aa	bb	bb	ab	bb	bb
A06	55.331	Block6442	aaxbb	aa	ab	ab	ab	bb	ab	aa	ab	aa	ab	ab	ab	bb	ab	ab	bb	bb	ab	ab	ab	ab	ab	bb	aa	aa	ab	bb	aa	ab	aa	ab	bb	ab	bb	ab	ab	aa	aa	ab	aa	aa	bb	bb	ab	bb	bb
A06	55.581	Block6444	aaxbb	aa	ab	ab	ab	bb	ab	aa	ab	aa	ab	ab	ab	bb	ab	ab	bb	bb	ab	ab	ab	ab	ab	bb	aa	aa	ab	bb	aa	ab	aa	ab	bb	ab	bb	ab	ab	aa	aa	ab	aa	aa	bb	bb	ab	bb	bb
A06	55.831	Block6445	aaxbb	aa	ab	ab	ab	bb	ab	aa	ab	aa	ab	ab	ab	bb	ab	ab	bb	bb	ab	ab	ab	ab	ab	bb	aa	aa	ab	bb	aa	ab	aa	ab	bb	ab	bb	ab	ab	aa	aa	ab	aa	aa	bb	bb	ab	bb	bb
A06	56.081	Block6450	aaxbb	aa	ab	ab	ab	bb	ab	aa	ab	aa	ab	ab	ab	bb	ab	ab	bb	bb	ab	ab	ab	ab	ab	bb	aa	aa	ab	bb	aa	ab	aa	ab	bb	ab	bb	ab	ab	aa	aa	ab	aa	aa	bb	bb	ab	bb	bb
A06	56.081	Block6446	aaxbb	aa	ab	ab	ab	bb	ab	aa	ab	aa	ab	ab	ab	bb	ab	ab	bb	bb	ab	ab	ab	ab	ab	bb	aa	aa	ab	bb	aa	ab	aa	ab	bb	ab	bb	ab	ab	aa	aa	ab	aa	aa	bb	bb	ab	bb	bb
A06	56.081	Block6449	aaxbb	aa	ab	ab	ab	bb	ab	aa	ab	aa	ab	ab	ab	bb	ab	ab	bb	bb	ab	ab	ab	ab	ab	bb	aa	aa	ab	bb	aa	ab	aa	ab	bb	ab	bb	ab	ab	aa	aa	ab	aa	aa	bb	bb	ab	bb	bb
A06	56.081	Block6448	aaxbb	aa	ab	ab	ab	bb	ab	aa	ab	aa	ab	ab	ab	bb	ab	ab	bb	bb	ab	ab	ab	ab	ab	bb	aa	aa	ab	bb	aa	ab	aa	ab	bb	ab	bb	ab	ab	aa	aa	ab	aa	aa	bb	bb	ab	bb	bb
A06	56.331	Block6452	aaxbb	aa	ab	ab	ab	bb	ab	aa	ab	aa	ab	ab	ab	bb	ab	ab	bb	bb	ab	ab	ab	ab	ab	bb	aa	aa	ab	bb	aa	ab	aa	ab	bb	ab	bb	ab	ab	aa	aa	ab	aa	aa	bb	bb	ab	bb	bb
A06	56.581	Block6456	aaxbb	aa	ab	ab	ab	bb	ab	aa	ab	aa	ab	ab	ab	bb	ab	ab	bb	bb	ab	ab	ab	ab	ab	bb	aa	aa	ab	bb	aa	ab	aa	ab	bb	ab	bb	ab	ab	aa	aa	ab	aa	aa	bb	bb	ab	bb	bb
A06	56.831	Block6457	aaxbb	aa	ab	ab	ab	bb	ab	aa	ab	aa	ab	ab	ab	bb	ab	ab	bb	bb	ab	ab	ab	ab	ab	bb	aa	aa	ab	bb	aa	ab	aa	ab	bb	ab	bb	ab	ab	aa	aa	ab	aa	aa	bb	bb	ab	bb	bb
A06	57.331	Block6460	aaxbb	aa	ab	ab	ab	bb	ab	aa	ab	aa	ab	ab	ab	bb	ab	ab	bb	bb	ab	ab	ab	ab	ab	bb	aa	aa	ab	bb	aa	ab	aa	ab	bb	ab	bb	ab	ab	aa	aa	ab	aa	aa	bb	bb	ab	bb	bb
A06	57.831	Block6463	aaxbb	aa	ab	ab	ab	bb	ab	aa	ab	aa	ab	ab	ab	bb	ab	ab	bb	bb	ab	ab	ab	ab	ab	bb	aa	aa	ab	bb	aa	ab	aa	ab	bb	ab	bb	ab	ab	aa	aa	ab	aa	aa	bb	bb	ab	bb	bb
A06	58.081	Block6485	aaxbb	aa	ab	ab	ab	bb	ab	aa	ab	aa	ab	ab	ab	bb	ab	ab	bb	bb	ab	ab	ab	ab	ab	bb	aa	aa	ab	bb	aa	ab	aa	ab	bb	ab	bb	ab	ab	aa	aa	ab	aa	aa	bb	bb	ab	bb	bb
A06	58.081	Block6462	aaxbb	aa	ab	ab	ab	bb	ab	aa	ab	aa	ab	ab	ab	bb	ab	ab	bb	bb	ab	ab	ab	ab	ab	bb	aa	aa	ab	bb	aa	ab	aa	ab	bb	ab	bb	ab	ab	aa	aa	ab	aa	aa	bb	bb	ab	bb	bb
A06	59.081	Block6564	aaxbb	aa	ab	ab	ab	bb	ab	aa	ab	aa	ab	ab	ab	bb	ab	ab	bb	bb	ab	ab	ab	ab	ab	bb	aa	aa	ab	bb	aa	ab	aa	ab	bb	ab	bb	ab	ab	aa	aa	ab	ab	aa	bb	bb	ab	bb	bb
A06	59.331	Block6535	aaxbb	aa	ab	ab	ab	bb	ab	aa	ab	aa	ab	ab	ab	bb	ab	ab	bb	bb	ab	ab	ab	ab	ab	bb	aa	aa	ab	bb	aa	ab	aa	ab	bb	ab	bb	ab	ab	aa	aa	ab	ab	aa	bb	bb	ab	bb	bb
A06	59.331	Block6536	aaxbb	aa	ab	ab	ab	bb	ab	aa	ab	aa	ab	ab	ab	bb	ab	ab	bb	bb	ab	ab	ab	ab	ab	bb	aa	aa	ab	bb	aa	ab	aa	ab	bb	ab	bb	ab	ab	aa	aa	ab	ab	aa	bb	bb	ab	bb	bb
A06	62.134	Block6548	aaxbb	aa	ab	aa	aa	bb	aa	aa	aa	aa	aa	aa	ab	bb	ab	aa	bb	bb	ab	ab	aa	aa	aa	bb	aa	aa	aa	bb	aa	ab	aa	ab	bb	ab	bb	ab	ab	aa	aa	ab	ab	aa	bb	bb	ab	bb	bb
A06	63.385	Block6478	aaxbb	aa	ab	aa	aa	ab	aa	aa	aa	aa	aa	aa	ab	ab	ab	aa	ab	ab	ab	ab	aa	aa	aa	ab	aa	aa	aa	bb	aa	ab	aa	ab	bb	ab	bb	ab	ab	aa	aa	ab	ab	aa	bb	bb	ab	bb	bb
A06	65.135	Block6583	aaxbb	aa	ab	aa	ab	ab	aa	aa	ab	aa	aa	aa	ab	ab	ab	ab	ab	ab	ab	ab	aa	aa	aa	ab	aa	aa	aa	ab	aa	bb	aa	ab	bb	ab	bb	ab	ab	aa	ab	ab	ab	aa	bb	bb	ab	bb	bb
A06	68.239	Block6615	aaxbb	aa	ab	aa	aa	ab	aa	aa	aa	aa	aa	ab	ab	ab	ab	aa	ab	ab	ab	ab	aa	aa	aa	ab	aa	aa	aa	ab	aa	bb	aa	bb	bb	ab	bb	ab	ab	aa	ab	ab	ab	aa	bb	bb	ab	bb	bb
A06	69.239	Block6619	aaxbb	aa	ab	aa	aa	ab	aa	aa	aa	aa	aa	ab	ab	ab	ab	aa	ab	ab	ab	ab	aa	aa	ab	ab	aa	aa	aa	ab	aa	bb	aa	bb	bb	ab	bb	ab	ab	aa	ab	ab	ab	aa	bb	bb	ab	bb	bb
A06	69.489	Block6620	aaxbb	aa	ab	aa	aa	ab	aa	aa	aa	aa	aa	aa	ab	ab	ab	aa	ab	ab	ab	ab	aa	aa	ab	ab	aa	aa	aa	ab	aa	bb	aa	bb	bb	ab	bb	ab	ab	aa	ab	ab	ab	aa	bb	bb	ab	bb	bb
A06	69.989	Block6654	aaxbb	aa	ab	aa	aa	ab	aa	aa	aa	aa	aa	aa	ab	ab	ab	aa	ab	ab	ab	ab	aa	aa	aa	ab	aa	aa	aa	ab	aa	bb	aa	bb	bb	ab	bb	ab	ab	aa	ab	ab	ab	aa	bb	bb	ab	bb	bb
A06	70.239	Block6655	aaxbb	aa	ab	aa	aa	ab	aa	aa	aa	aa	aa	aa	ab	ab	ab	aa	ab	ab	ab	ab	aa	aa	aa	ab	aa	aa	aa	ab	aa	bb	aa	bb	bb	ab	bb	ab	ab	aa	ab	ab	ab	aa	bb	bb	ab	bb	bb
A06	70.739	Block6691	aaxbb	aa	ab	aa	aa	ab	aa	aa	aa	aa	ab	aa	ab	ab	ab	aa	ab	ab	ab	ab	aa	aa	aa	ab	aa	aa	ab	ab	aa	bb	aa	bb	bb	ab	bb	ab	ab	aa	ab	ab	ab	aa	bb	bb	ab	bb	bb
A06	71.489	Block6647	aaxbb	aa	ab	aa	aa	ab	aa	aa	aa	aa	ab	aa	ab	ab	ab	aa	ab	ab	ab	ab	ab	aa	aa	ab	aa	aa	aa	ab	aa	bb	aa	bb	bb	ab	bb	ab	ab	aa	ab	ab	ab	aa	bb	bb	ab	bb	bb
A06	72.74	Block6651	aaxbb	aa	ab	ab	ab	ab	ab	aa	aa	aa	ab	aa	ab	ab	ab	aa	ab	ab	ab	ab	ab	aa	ab	ab	aa	aa	ab	ab	aa	bb	aa	bb	bb	ab	bb	ab	ab	aa	ab	ab	ab	aa	bb	bb	ab	bb	bb
A06	73.49	Block6638	aaxbb	aa	ab	ab	ab	ab	ab	aa	aa	aa	ab	ab	ab	ab	ab	ab	ab	ab	ab	ab	ab	ab	ab	ab	aa	aa	ab	ab	aa	bb	aa	bb	bb	ab	bb	ab	ab	aa	ab	ab	ab	aa	bb	bb	ab	bb	bb
A06	73.74	Block6663	aaxbb	aa	ab	ab	ab	ab	ab	aa	aa	aa	ab	ab	ab	ab	ab	ab	ab	ab	ab	ab	ab	ab	ab	ab	aa	aa	ab	ab	aa	bb	aa	bb	bb	ab	bb	ab	ab	aa	ab	ab	ab	aa	bb	bb	ab	bb	bb
A06	73.99	Block6665	aaxbb	aa	ab	ab	ab	ab	ab	aa	aa	aa	ab	ab	ab	ab	ab	aa	ab	ab	ab	ab	ab	ab	ab	ab	aa	aa	ab	ab	aa	bb	aa	bb	bb	ab	bb	ab	ab	aa	ab	ab	ab	aa	bb	bb	ab	bb	bb
A06	74.24	Block6674	aaxbb	aa	ab	ab	ab	ab	ab	aa	aa	aa	ab	ab	ab	ab	ab	aa	ab	ab	ab	ab	ab	ab	ab	ab	aa	aa	ab	ab	aa	bb	aa	bb	bb	ab	bb	ab	ab	aa	ab	ab	ab	aa	bb	bb	ab	bb	bb
A06	74.74	Block6686	aaxbb	aa	ab	ab	ab	ab	ab	aa	aa	aa	ab	ab	ab	ab	ab	aa	ab	ab	ab	ab	ab	ab	ab	ab	aa	aa	ab	ab	aa	bb	aa	bb	bb	ab	bb	ab	ab	aa	ab	ab	ab	aa	bb	bb	ab	bb	bb
A06	74.99	Block6679	aaxbb	aa	ab	ab	ab	ab	ab	aa	aa	aa	ab	ab	ab	ab	ab	ab	ab	ab	ab	ab	ab	ab	ab	ab	aa	aa	ab	ab	aa	bb	aa	bb	bb	ab	bb	ab	ab	aa	ab	ab	ab	aa	bb	bb	ab	bb	bb
A06	74.99	Block6683	aaxbb	aa	ab	ab	ab	ab	ab	aa	aa	aa	ab	ab	ab	ab	ab	ab	ab	ab	ab	ab	ab	ab	ab	ab	aa	aa	ab	ab	aa	bb	aa	bb	bb	ab	bb	ab	ab	aa	ab	ab	ab	aa	bb	bb	ab	bb	bb
A06	74.99	Block6680	aaxbb	aa	ab	ab	ab	ab	ab	aa	aa	aa	ab	ab	ab	ab	ab	ab	ab	ab	ab	ab	ab	ab	ab	ab	aa	aa	ab	ab	aa	bb	aa	bb	bb	ab	bb	ab	ab	aa	ab	ab	ab	aa	bb	bb	ab	bb	bb
A06	75.49	Block6681	aaxbb	aa	ab	ab	ab	ab	ab	aa	aa	aa	ab	ab	ab	ab	ab	ab	ab	bb	bb	ab	ab	ab	ab	ab	aa	aa	ab	ab	aa	bb	aa	bb	bb	ab	bb	ab	ab	aa	ab	ab	ab	aa	bb	bb	ab	bb	bb
A06	77.291	Block6743	aaxbb	aa	ab	ab	ab	ab	ab	aa	aa	aa	ab	ab	ab	ab	ab	ab	ab	bb	bb	ab	ab	ab	ab	ab	aa	aa	ab	ab	aa	bb	aa	bb	bb	ab	bb	ab	ab	aa	ab	ab	ab	aa	bb	bb	ab	bb	bb
A06	78.291	Block6748	aaxbb	aa	ab	ab	ab	ab	ab	aa	aa	aa	ab	ab	ab	ab	ab	ab	ab	bb	bb	ab	ab	ab	ab	ab	aa	aa	ab	ab	aa	bb	ab	bb	bb	ab	bb	ab	ab	aa	ab	ab	ab	aa	bb	bb	ab	bb	bb
A06	78.892	Block6751	aaxbb	aa	ab	ab	ab	ab	ab	aa	aa	aa	ab	ab	ab	ab	ab	ab	ab	bb	bb	ab	ab	ab	ab	ab	aa	aa	ab	ab	aa	bb	ab	bb	bb	ab	bb	ab	ab	aa	ab	ab	ab	aa	bb	bb	aa	bb	bb
A06	79.743	Block6756	aaxbb	aa	ab	ab	ab	ab	ab	aa	aa	aa	ab	ab	ab	ab	ab	ab	ab	ab	ab	ab	ab	ab	ab	ab	aa	aa	ab	ab	aa	bb	ab	bb	bb	ab	bb	ab	ab	aa	ab	ab	ab	aa	bb	bb	aa	bb	bb
A06	80.243	Block6755	aaxbb	aa	ab	ab	ab	ab	ab	aa	aa	aa	ab	ab	ab	ab	ab	ab	ab	bb	bb	ab	ab	ab	ab	ab	aa	aa	ab	ab	aa	bb	ab	bb	bb	ab	bb	ab	ab	aa	ab	ab	ab	aa	bb	bb	aa	bb	bb
A06	81.095	Block6779	aaxbb	aa	ab	ab	ab	ab	ab	aa	aa	aa	ab	ab	ab	ab	ab	ab	ab	bb	bb	ab	ab	ab	ab	ab	aa	aa	ab	ab	aa	bb	ab	bb	bb	ab	bb	ab	ab	aa	ab	ab	ab	aa	bb	bb	aa	bb	bb
A06	83.647	Block6840	aaxbb	ab	ab	ab	ab	ab	ab	aa	aa	aa	ab	ab	ab	ab	ab	ab	ab	bb	bb	ab	ab	ab	ab	ab	aa	aa	ab	ab	aa	bb	ab	bb	bb	ab	bb	ab	ab	aa	ab	ab	ab	aa	ab	bb	aa	bb	bb
A06	85.698	Block6894	aaxbb	ab	ab	ab	ab	ab	ab	aa	aa	aa	ab	ab	ab	ab	ab	ab	ab	ab	ab	ab	ab	ab	ab	ab	aa	aa	ab	ab	aa	bb	ab	bb	bb	ab	bb	ab	ab	aa	ab	ab	ab	aa	ab	bb	aa	bb	bb
A06	86.198	Block6904	aaxbb	aa	ab	ab	ab	ab	ab	aa	aa	aa	ab	ab	ab	ab	ab	ab	ab	ab	ab	ab	ab	ab	ab	ab	aa	aa	ab	ab	aa	bb	ab	bb	bb	ab	bb	ab	ab	aa	ab	ab	ab	aa	ab	bb	aa	bb	bb
A06	88.249	Block6920	aaxbb	ab	ab	ab	ab	ab	ab	aa	aa	aa	ab	ab	ab	ab	ab	ab	ab	bb	bb	ab	ab	ab	ab	ab	aa	aa	ab	ab	aa	bb	ab	bb	bb	ab	bb	ab	ab	aa	ab	ab	ab	aa	ab	bb	aa	bb	bb
A06	88.999	Block6923	aaxbb	ab	ab	ab	ab	ab	ab	aa	aa	aa	ab	ab	ab	ab	ab	ab	ab	bb	bb	ab	ab	ab	ab	ab	aa	aa	ab	ab	aa	bb	ab	bb	bb	ab	bb	ab	ab	aa	ab	ab	ab	aa	ab	bb	aa	bb	bb
A06	91.602	Block6949	aaxbb	ab	ab	ab	ab	ab	ab	aa	aa	aa	ab	ab	ab	ab	ab	ab	ab	ab	ab	ab	ab	ab	ab	ab	aa	aa	ab	ab	aa	bb	ab	bb	bb	ab	bb	ab	ab	aa	ab	ab	bb	aa	ab	bb	aa	bb	ab
A06	92.453	Block6974	aaxbb	ab	ab	ab	ab	ab	ab	aa	aa	aa	ab	ab	ab	ab	ab	ab	ab	ab	ab	ab	ab	ab	ab	ab	aa	aa	ab	ab	aa	bb	ab	bb	bb	ab	bb	ab	ab	bb	ab	ab	bb	aa	ab	bb	aa	bb	ab
A06	93.203	Block6981	aaxbb	ab	ab	ab	ab	ab	ab	aa	aa	aa	ab	ab	ab	ab	ab	ab	ab	ab	ab	ab	ab	ab	ab	ab	aa	aa	ab	ab	aa	bb	ab	bb	bb	ab	bb	ab	ab	bb	ab	ab	bb	aa	ab	bb	aa	bb	ab
A06	93.953	Block7011	aaxbb	ab	ab	ab	ab	ab	ab	aa	aa	aa	ab	ab	ab	ab	ab	ab	ab	ab	ab	ab	ab	ab	ab	ab	aa	aa	ab	ab	aa	bb	ab	bb	bb	ab	bb	ab	ab	bb	ab	ab	bb	aa	ab	bb	aa	bb	ab
A06	94.203	Block7012	aaxbb	ab	ab	ab	ab	ab	ab	aa	aa	aa	ab	ab	ab	ab	ab	aa	ab	ab	ab	ab	ab	ab	ab	ab	aa	aa	ab	ab	aa	bb	ab	bb	bb	ab	bb	ab	ab	bb	ab	ab	bb	aa	ab	bb	aa	bb	ab
A06	94.203	Block7013	aaxbb	ab	ab	ab	ab	ab	ab	aa	aa	aa	ab	ab	ab	ab	ab	aa	ab	ab	ab	ab	ab	ab	ab	ab	aa	aa	ab	ab	aa	bb	ab	bb	bb	ab	bb	ab	ab	bb	ab	ab	bb	aa	ab	bb	aa	bb	ab
A06	94.703	Block7113	aaxbb	ab	ab	ab	ab	ab	ab	aa	aa	aa	ab	ab	ab	ab	ab	aa	aa	ab	ab	ab	ab	ab	ab	aa	aa	aa	ab	ab	aa	bb	ab	bb	bb	ab	bb	ab	ab	bb	ab	ab	bb	aa	ab	bb	aa	bb	ab
A06	95.703	Block7020	aaxbb	ab	ab	ab	ab	ab	aa	aa	aa	aa	ab	ab	ab	ab	ab	aa	aa	ab	ab	ab	ab	aa	aa	aa	aa	aa	aa	ab	aa	bb	ab	bb	bb	ab	bb	ab	ab	bb	ab	ab	bb	aa	ab	bb	aa	bb	ab
A06	95.703	Block6988	aaxbb	ab	ab	ab	ab	ab	aa	aa	aa	aa	ab	ab	ab	ab	ab	aa	aa	ab	ab	ab	ab	aa	aa	aa	aa	aa	aa	ab	aa	bb	ab	bb	bb	ab	bb	ab	ab	bb	ab	ab	bb	aa	ab	bb	aa	bb	ab
A06	97.254	Block7090	aaxbb	ab	ab	ab	ab	ab	aa	aa	aa	aa	ab	ab	ab	ab	ab	ab	aa	ab	ab	ab	ab	aa	aa	ab	aa	aa	aa	ab	aa	bb	ab	bb	bb	ab	bb	ab	ab	bb	ab	ab	bb	aa	ab	bb	aa	bb	ab
A06	97.754	Block7099	aaxbb	ab	ab	ab	ab	ab	aa	aa	aa	aa	ab	ab	ab	ab	ab	aa	aa	ab	ab	ab	ab	ab	aa	ab	aa	aa	aa	ab	aa	bb	ab	bb	bb	ab	bb	ab	ab	bb	ab	ab	bb	aa	ab	bb	aa	bb	ab
A06	98.254	Block7046	aaxbb	ab	ab	ab	ab	ab	aa	aa	aa	aa	ab	ab	ab	ab	ab	aa	aa	ab	ab	ab	ab	ab	ab	aa	aa	aa	aa	ab	aa	bb	ab	bb	bb	ab	bb	ab	ab	bb	ab	ab	bb	aa	ab	bb	aa	bb	ab
A06	98.754	Block7082	aaxbb	ab	ab	ab	ab	ab	aa	aa	aa	aa	ab	ab	ab	ab	ab	aa	aa	ab	ab	ab	ab	ab	aa	aa	aa	aa	aa	ab	aa	bb	ab	bb	bb	ab	bb	ab	ab	bb	ab	ab	bb	aa	ab	bb	aa	bb	ab
A06	100.555	Block6962	aaxbb	ab	ab	ab	ab	ab	aa	aa	aa	aa	ab	ab	ab	ab	ab	ab	aa	ab	ab	ab	ab	ab	aa	aa	aa	aa	ab	ab	aa	bb	ab	bb	bb	ab	bb	ab	ab	bb	ab	ab	bb	aa	ab	bb	aa	bb	ab
A06	100.805	Block6961	aaxbb	ab	ab	ab	ab	ab	ab	aa	aa	aa	ab	ab	ab	ab	ab	ab	aa	ab	ab	ab	ab	ab	aa	aa	aa	aa	ab	ab	aa	bb	ab	bb	bb	ab	bb	ab	ab	bb	ab	ab	bb	aa	ab	bb	aa	bb	ab
A06	103.658	Block6955	aaxbb	ab	ab	ab	bb	bb	ab	aa	aa	aa	ab	bb	ab	bb	bb	ab	aa	bb	bb	bb	bb	ab	aa	ab	aa	aa	aa	ab	aa	bb	ab	bb	bb	ab	bb	ab	ab	bb	ab	ab	bb	aa	ab	bb	aa	bb	ab
A06	105.158	Block6952	aaxbb	ab	ab	ab	bb	bb	ab	aa	aa	aa	ab	bb	ab	bb	bb	ab	ab	bb	bb	bb	bb	ab	ab	ab	aa	aa	ab	bb	aa	bb	ab	bb	bb	ab	bb	ab	ab	bb	ab	ab	bb	aa	ab	bb	aa	bb	ab
A06	105.658	Block7034	aaxbb	ab	ab	ab	bb	bb	ab	aa	aa	aa	ab	bb	ab	bb	bb	ab	ab	bb	bb	bb	bb	ab	ab	ab	aa	aa	ab	bb	aa	bb	ab	bb	bb	ab	bb	ab	ab	bb	ab	ab	bb	aa	ab	bb	aa	bb	ab
A06	105.658	Block7032	aaxbb	ab	ab	ab	bb	bb	ab	aa	aa	aa	ab	bb	ab	bb	bb	ab	ab	bb	bb	bb	bb	ab	ab	ab	aa	aa	ab	bb	aa	bb	ab	bb	bb	ab	bb	ab	ab	bb	ab	ab	bb	aa	ab	bb	aa	bb	ab
A06	105.908	Block7035	aaxbb	ab	ab	ab	bb	bb	ab	aa	aa	aa	ab	bb	ab	bb	bb	ab	ab	bb	bb	bb	bb	ab	ab	ab	aa	aa	ab	bb	aa	bb	ab	bb	bb	ab	bb	ab	ab	bb	ab	ab	bb	aa	ab	bb	aa	bb	ab
A06	106.158	Block7036	aaxbb	ab	ab	ab	bb	bb	ab	aa	aa	aa	ab	bb	ab	bb	bb	ab	ab	bb	bb	bb	bb	ab	ab	ab	aa	aa	ab	bb	aa	bb	ab	bb	bb	ab	bb	ab	ab	bb	ab	ab	bb	aa	ab	bb	aa	bb	ab
A06	106.408	Block7037	aaxbb	ab	ab	ab	bb	bb	ab	aa	aa	aa	ab	bb	ab	bb	bb	ab	ab	bb	bb	bb	bb	ab	ab	ab	aa	aa	ab	bb	aa	bb	ab	bb	bb	ab	bb	ab	ab	bb	ab	ab	bb	aa	ab	bb	aa	bb	ab
A06	106.658	Block7050	aaxbb	ab	ab	ab	bb	bb	ab	aa	aa	aa	ab	bb	ab	bb	bb	ab	ab	bb	bb	bb	bb	ab	ab	ab	aa	aa	ab	bb	aa	bb	ab	bb	bb	ab	bb	ab	ab	bb	ab	ab	bb	aa	ab	bb	aa	bb	ab
A06	106.908	Block7059	aaxbb	ab	ab	ab	bb	bb	ab	aa	aa	aa	ab	bb	ab	bb	bb	ab	ab	bb	bb	bb	bb	ab	ab	ab	aa	aa	ab	bb	aa	bb	ab	bb	bb	ab	bb	ab	ab	bb	ab	ab	bb	aa	ab	bb	aa	bb	ab
A06	107.158	Block7072	aaxbb	ab	ab	ab	bb	bb	ab	aa	aa	aa	ab	bb	ab	bb	bb	ab	ab	bb	bb	bb	bb	ab	ab	ab	aa	aa	ab	bb	aa	bb	ab	bb	bb	ab	bb	ab	ab	bb	ab	ab	bb	aa	ab	bb	aa	bb	ab
A06	107.158	Block7061	aaxbb	ab	ab	ab	bb	bb	ab	aa	aa	aa	ab	bb	ab	bb	bb	ab	ab	bb	bb	bb	bb	ab	ab	ab	aa	aa	ab	bb	aa	bb	ab	bb	bb	ab	bb	ab	ab	bb	ab	ab	bb	aa	ab	bb	aa	bb	ab
A06	108.408	Block7127	aaxbb	ab	ab	ab	bb	bb	ab	aa	aa	aa	ab	bb	ab	bb	bb	ab	ab	bb	bb	bb	bb	ab	ab	ab	aa	aa	ab	bb	aa	bb	ab	bb	bb	ab	bb	ab	ab	bb	ab	ab	bb	aa	ab	bb	aa	bb	ab
A06	111.512	Block7161	aaxbb	ab	ab	ab	bb	bb	ab	aa	aa	aa	ab	bb	ab	bb	bb	ab	ab	bb	bb	bb	bb	ab	ab	ab	aa	aa	ab	bb	aa	bb	ab	ab	bb	ab	ab	ab	ab	bb	bb	ab	bb	ab	ab	bb	aa	bb	ab
A06	111.762	Block7146	aaxbb	ab	ab	ab	bb	bb	ab	aa	aa	aa	ab	bb	ab	bb	bb	ab	ab	bb	ab	bb	bb	ab	ab	ab	aa	aa	ab	bb	aa	bb	ab	ab	bb	ab	ab	ab	ab	bb	bb	ab	bb	ab	ab	bb	aa	bb	ab
A06	111.762	Block7145	aaxbb	ab	ab	ab	bb	bb	ab	aa	aa	aa	ab	bb	ab	bb	bb	ab	ab	bb	ab	bb	bb	ab	ab	ab	aa	aa	ab	bb	aa	bb	ab	ab	bb	ab	ab	ab	ab	bb	bb	ab	bb	ab	ab	bb	aa	bb	ab
A06	113.313	Block7189	aaxbb	ab	ab	ab	bb	bb	ab	aa	aa	aa	ab	bb	ab	bb	bb	ab	ab	bb	ab	bb	bb	ab	ab	ab	aa	aa	ab	ab	aa	bb	ab	ab	bb	ab	ab	ab	ab	bb	bb	ab	bb	ab	ab	bb	aa	bb	ab
A06	113.313	Block7188	aaxbb	ab	ab	ab	bb	bb	ab	aa	aa	aa	ab	bb	ab	bb	bb	ab	ab	bb	ab	bb	bb	ab	ab	ab	aa	aa	ab	ab	aa	bb	ab	ab	bb	ab	ab	ab	ab	bb	bb	ab	bb	ab	ab	bb	aa	bb	ab
A06	113.313	Block7186	aaxbb	ab	ab	ab	bb	bb	ab	aa	aa	aa	ab	bb	ab	bb	bb	ab	ab	bb	ab	bb	bb	ab	ab	ab	aa	aa	ab	ab	aa	bb	ab	ab	bb	ab	ab	ab	ab	bb	bb	ab	bb	ab	ab	bb	aa	bb	ab
A06	113.313	Block7185	aaxbb	ab	ab	ab	bb	bb	ab	aa	aa	aa	ab	bb	ab	bb	bb	ab	ab	bb	ab	bb	bb	ab	ab	ab	aa	aa	ab	ab	aa	bb	ab	ab	bb	ab	ab	ab	ab	bb	bb	ab	bb	ab	ab	bb	aa	bb	ab
A06	113.313	Block7177	aaxbb	ab	ab	ab	bb	bb	ab	aa	aa	aa	ab	bb	ab	bb	bb	ab	ab	bb	ab	bb	bb	ab	ab	ab	aa	aa	ab	ab	aa	bb	ab	ab	bb	ab	ab	ab	ab	bb	bb	ab	bb	ab	ab	bb	aa	bb	ab
A06	116.166	Block7190	aaxbb	ab	ab	ab	bb	bb	ab	aa	aa	aa	ab	bb	ab	bb	bb	ab	bb	bb	ab	bb	ab	ab	ab	ab	aa	aa	ab	ab	aa	bb	ab	ab	bb	ab	ab	ab	ab	bb	bb	ab	bb	ab	aa	bb	aa	bb	ab
A07	0	Block7639	aaxbb	ab	ab	bb	ab	ab	ab	aa	aa	ab	ab	aa	ab	bb	aa	aa	bb	ab	bb	aa	ab	aa	bb	ab	aa	bb	aa	ab	bb	bb	aa	bb	bb	ab	aa	ab	bb	ab	ab	ab	aa	bb	ab	ab	aa	ab	ab
A07	0	Block7637	aaxbb	ab	ab	bb	ab	ab	ab	aa	aa	ab	ab	aa	ab	bb	aa	aa	bb	ab	bb	aa	ab	aa	bb	ab	aa	bb	aa	ab	bb	bb	aa	bb	bb	ab	aa	ab	bb	ab	ab	ab	aa	bb	ab	ab	aa	ab	ab
A07	0.25	Block7640	aaxbb	ab	bb	bb	ab	ab	ab	aa	aa	ab	ab	aa	ab	bb	aa	aa	bb	ab	bb	aa	ab	aa	bb	ab	aa	bb	aa	ab	bb	bb	aa	bb	bb	ab	aa	ab	bb	ab	ab	ab	aa	bb	ab	ab	aa	ab	ab
A07	0.25	Block7638	aaxbb	ab	bb	bb	ab	ab	ab	aa	aa	ab	ab	aa	ab	bb	aa	aa	bb	ab	bb	aa	ab	aa	bb	ab	aa	bb	aa	ab	bb	bb	aa	bb	bb	ab	aa	ab	bb	ab	ab	ab	aa	bb	ab	ab	aa	ab	ab
A07	0.5	Block7641	aaxbb	ab	bb	bb	ab	ab	ab	aa	aa	ab	bb	aa	ab	bb	aa	aa	bb	ab	bb	aa	ab	aa	bb	ab	aa	bb	aa	ab	bb	bb	aa	bb	bb	ab	aa	ab	bb	ab	ab	ab	aa	bb	ab	ab	aa	ab	ab
A07	0.75	Block7648	aaxbb	ab	bb	bb	ab	ab	ab	aa	aa	ab	bb	aa	ab	bb	aa	aa	bb	ab	bb	aa	ab	aa	bb	ab	aa	bb	aa	ab	bb	bb	aa	bb	bb	ab	aa	ab	bb	ab	ab	ab	aa	bb	ab	ab	aa	ab	ab
A07	0.75	Block7644	aaxbb	ab	bb	bb	ab	ab	ab	aa	aa	ab	bb	aa	ab	bb	aa	aa	bb	ab	bb	aa	ab	aa	bb	ab	aa	bb	aa	ab	bb	bb	aa	bb	bb	ab	aa	ab	bb	ab	ab	ab	aa	bb	ab	ab	aa	ab	ab
A07	0.75	Block7642	aaxbb	ab	bb	bb	ab	ab	ab	aa	aa	ab	bb	aa	ab	bb	aa	aa	bb	ab	bb	aa	ab	aa	bb	ab	aa	bb	aa	ab	bb	bb	aa	bb	bb	ab	aa	ab	bb	ab	ab	ab	aa	bb	ab	ab	aa	ab	ab
A07	1	Block7650	aaxbb	ab	ab	bb	ab	ab	ab	aa	aa	ab	bb	aa	ab	bb	aa	aa	bb	ab	bb	aa	ab	aa	bb	ab	aa	bb	aa	ab	bb	bb	aa	bb	bb	ab	aa	ab	bb	ab	ab	ab	aa	bb	ab	ab	aa	ab	ab
A07	1.5	Block7653	aaxbb	ab	bb	bb	ab	ab	ab	aa	aa	ab	bb	aa	ab	bb	aa	aa	bb	ab	bb	aa	ab	aa	bb	ab	aa	bb	aa	ab	bb	bb	aa	bb	bb	ab	aa	ab	bb	ab	ab	ab	aa	bb	ab	ab	aa	ab	ab
A07	1.75	Block7654	aaxbb	ab	bb	bb	ab	ab	ab	aa	aa	ab	bb	aa	ab	bb	aa	aa	bb	ab	bb	aa	ab	aa	bb	ab	aa	bb	ab	ab	bb	bb	aa	bb	bb	ab	aa	ab	bb	ab	ab	ab	aa	bb	ab	ab	aa	ab	ab
A07	2	Block7655	aaxbb	ab	bb	bb	ab	ab	ab	aa	aa	ab	bb	aa	ab	bb	aa	aa	bb	ab	bb	aa	ab	aa	bb	ab	aa	bb	ab	ab	bb	bb	aa	bb	bb	ab	aa	ab	bb	ab	ab	ab	aa	bb	ab	ab	aa	ab	ab
A07	2.5	Block7657	aaxbb	ab	ab	bb	ab	ab	ab	aa	aa	ab	bb	aa	ab	bb	aa	aa	bb	ab	bb	aa	ab	aa	bb	ab	aa	bb	ab	ab	bb	bb	aa	bb	bb	ab	aa	ab	bb	ab	ab	ab	aa	bb	ab	ab	aa	ab	ab
A07	2.75	Block7662	aaxbb	ab	ab	bb	ab	ab	ab	aa	aa	ab	bb	aa	ab	bb	aa	aa	bb	ab	bb	aa	ab	aa	bb	ab	aa	bb	ab	ab	bb	bb	aa	bb	bb	ab	aa	ab	bb	ab	ab	ab	aa	bb	ab	ab	aa	ab	ab
A07	2.75	Block7660	aaxbb	ab	ab	bb	ab	ab	ab	aa	aa	ab	bb	aa	ab	bb	aa	aa	bb	ab	bb	aa	ab	aa	bb	ab	aa	bb	ab	ab	bb	bb	aa	bb	bb	ab	aa	ab	bb	ab	ab	ab	aa	bb	ab	ab	aa	ab	ab
A07	2.75	Block7658	aaxbb	ab	ab	bb	ab	ab	ab	aa	aa	ab	bb	aa	ab	bb	aa	aa	bb	ab	bb	aa	ab	aa	bb	ab	aa	bb	ab	ab	bb	bb	aa	bb	bb	ab	aa	ab	bb	ab	ab	ab	aa	bb	ab	ab	aa	ab	ab
A07	3	Block7663	aaxbb	ab	bb	bb	ab	ab	ab	aa	aa	ab	bb	aa	ab	bb	aa	aa	bb	ab	bb	aa	ab	aa	bb	ab	aa	bb	ab	ab	bb	bb	aa	bb	bb	ab	aa	ab	bb	ab	ab	ab	aa	bb	ab	ab	aa	ab	ab
A07	3	Block7661	aaxbb	ab	bb	bb	ab	ab	ab	aa	aa	ab	bb	aa	ab	bb	aa	aa	bb	ab	bb	aa	ab	aa	bb	ab	aa	bb	ab	ab	bb	bb	aa	bb	bb	ab	aa	ab	bb	ab	ab	ab	aa	bb	ab	ab	aa	ab	ab
A07	3.25	Block7665	aaxbb	ab	bb	bb	aa	ab	ab	aa	aa	ab	bb	aa	ab	bb	aa	aa	bb	ab	bb	aa	ab	aa	bb	ab	aa	bb	ab	ab	bb	bb	aa	bb	bb	ab	aa	ab	bb	ab	ab	ab	aa	bb	ab	ab	aa	ab	ab
A07	3.25	Block7664	aaxbb	ab	bb	bb	aa	ab	ab	aa	aa	ab	bb	aa	ab	bb	aa	aa	bb	ab	bb	aa	ab	aa	bb	ab	aa	bb	ab	ab	bb	bb	aa	bb	bb	ab	aa	ab	bb	ab	ab	ab	aa	bb	ab	ab	aa	ab	ab
A07	4	Block7669	aaxbb	ab	ab	bb	aa	ab	ab	aa	aa	ab	bb	aa	ab	bb	aa	aa	bb	ab	bb	aa	ab	aa	bb	ab	aa	bb	ab	ab	bb	bb	aa	bb	bb	ab	aa	bb	bb	ab	ab	ab	aa	bb	ab	ab	aa	ab	ab
A07	4.25	Block7674	aaxbb	ab	ab	bb	aa	ab	ab	aa	aa	ab	bb	aa	ab	bb	aa	aa	bb	ab	bb	aa	ab	aa	bb	ab	aa	bb	ab	ab	bb	bb	aa	bb	bb	ab	aa	bb	bb	ab	ab	ab	aa	bb	ab	ab	aa	ab	ab
A07	4.25	Block7672	aaxbb	ab	ab	bb	aa	ab	ab	aa	aa	ab	bb	aa	ab	bb	aa	aa	bb	ab	bb	aa	ab	aa	bb	ab	aa	bb	ab	ab	bb	bb	aa	bb	bb	ab	aa	bb	bb	ab	ab	ab	aa	bb	ab	ab	aa	ab	ab
A07	4.5	Block7673	aaxbb	ab	bb	bb	aa	ab	ab	aa	aa	ab	bb	aa	ab	bb	aa	aa	bb	ab	bb	aa	ab	aa	bb	ab	aa	bb	ab	ab	bb	bb	aa	bb	bb	ab	aa	bb	bb	ab	ab	ab	aa	bb	ab	ab	aa	ab	ab
A07	4.5	Block7671	aaxbb	ab	bb	bb	aa	ab	ab	aa	aa	ab	bb	aa	ab	bb	aa	aa	bb	ab	bb	aa	ab	aa	bb	ab	aa	bb	ab	ab	bb	bb	aa	bb	bb	ab	aa	bb	bb	ab	ab	ab	aa	bb	ab	ab	aa	ab	ab
A07	5	Block7675	aaxbb	ab	ab	bb	aa	ab	ab	aa	aa	ab	bb	aa	ab	bb	aa	aa	bb	ab	bb	aa	ab	aa	bb	ab	aa	bb	ab	ab	bb	bb	aa	bb	bb	ab	aa	bb	bb	ab	ab	ab	aa	bb	ab	ab	aa	ab	ab
A07	5.25	Block7676	aaxbb	ab	ab	bb	aa	ab	ab	aa	aa	ab	bb	aa	ab	bb	aa	aa	bb	ab	bb	aa	ab	aa	bb	ab	aa	bb	ab	ab	bb	bb	aa	bb	bb	ab	aa	bb	bb	ab	ab	ab	aa	bb	ab	ab	aa	bb	ab
A07	5.5	Block7677	aaxbb	ab	ab	bb	aa	ab	ab	aa	aa	ab	bb	aa	ab	bb	aa	aa	ab	ab	bb	aa	ab	aa	bb	ab	aa	bb	ab	ab	bb	bb	aa	bb	bb	ab	aa	bb	bb	ab	ab	ab	aa	bb	ab	ab	aa	bb	ab
A07	6.25	Block7693	aaxbb	ab	ab	bb	aa	ab	ab	aa	aa	ab	bb	aa	ab	bb	aa	aa	ab	ab	bb	aa	ab	aa	bb	ab	aa	bb	ab	ab	bb	bb	aa	bb	bb	ab	aa	bb	bb	ab	ab	aa	aa	bb	ab	ab	aa	bb	ab
A07	7	Block7691	aaxbb	ab	ab	bb	aa	ab	ab	aa	aa	ab	bb	aa	ab	bb	aa	aa	bb	ab	bb	aa	ab	aa	bb	ab	aa	bb	ab	ab	bb	bb	aa	bb	bb	ab	aa	bb	bb	ab	ab	aa	aa	bb	ab	ab	aa	bb	ab
A07	7.5	Block7687	aaxbb	ab	ab	bb	aa	ab	ab	aa	aa	ab	bb	aa	ab	bb	aa	aa	bb	ab	bb	aa	ab	aa	bb	aa	aa	bb	ab	ab	bb	bb	aa	bb	bb	ab	aa	bb	bb	ab	ab	aa	aa	bb	ab	ab	aa	bb	ab
A07	8	Block7685	aaxbb	ab	bb	bb	aa	ab	ab	aa	aa	ab	bb	aa	ab	bb	aa	aa	bb	ab	bb	aa	ab	aa	bb	aa	aa	bb	ab	ab	bb	bb	aa	bb	bb	ab	aa	bb	bb	ab	ab	aa	aa	bb	ab	ab	aa	bb	ab
A07	8.75	Block7682	aaxbb	ab	ab	bb	aa	ab	ab	aa	aa	ab	bb	aa	ab	bb	aa	aa	ab	ab	bb	aa	ab	aa	bb	aa	aa	bb	ab	ab	bb	bb	aa	bb	bb	ab	aa	bb	bb	ab	ab	aa	aa	bb	ab	ab	aa	bb	ab
A07	9.5	Block7696	aaxbb	ab	ab	bb	aa	ab	ab	aa	aa	ab	bb	aa	ab	bb	aa	aa	ab	ab	bb	aa	ab	aa	bb	aa	aa	bb	ab	ab	bb	bb	aa	bb	bb	ab	aa	bb	bb	ab	ab	aa	aa	bb	ab	ab	aa	bb	ab
A07	10	Block7702	aaxbb	ab	ab	bb	aa	ab	ab	aa	aa	ab	bb	aa	ab	bb	aa	aa	ab	ab	bb	aa	ab	aa	bb	aa	aa	bb	ab	ab	bb	bb	aa	bb	ab	ab	aa	bb	bb	ab	ab	aa	aa	bb	ab	ab	aa	bb	ab
A07	10.5	Block7704	aaxbb	ab	ab	bb	aa	ab	ab	aa	aa	ab	bb	aa	ab	bb	aa	aa	ab	ab	bb	aa	ab	aa	bb	aa	aa	bb	ab	ab	bb	bb	aa	bb	bb	ab	aa	bb	bb	ab	ab	aa	aa	bb	ab	ab	aa	bb	ab
A07	11.25	Block7707	aaxbb	ab	ab	bb	aa	ab	ab	aa	aa	ab	bb	aa	ab	bb	aa	aa	ab	ab	bb	aa	ab	aa	bb	aa	aa	bb	ab	ab	bb	bb	aa	bb	bb	ab	aa	bb	bb	bb	ab	aa	aa	bb	ab	ab	aa	bb	ab
A07	11.5	Block7708	aaxbb	ab	ab	bb	aa	ab	ab	aa	aa	ab	bb	aa	ab	bb	aa	aa	ab	ab	bb	aa	ab	aa	bb	aa	aa	bb	ab	ab	bb	bb	aa	bb	bb	ab	aa	bb	bb	bb	ab	aa	aa	bb	ab	ab	aa	bb	ab
A07	12	Block7722	aaxbb	ab	ab	bb	aa	ab	ab	aa	aa	ab	bb	aa	ab	bb	aa	aa	ab	ab	bb	aa	ab	aa	bb	aa	aa	bb	ab	ab	bb	bb	aa	bb	bb	ab	aa	bb	bb	bb	ab	aa	aa	bb	ab	ab	aa	bb	ab
A07	12	Block7714	aaxbb	ab	ab	bb	aa	ab	ab	aa	aa	ab	bb	aa	ab	bb	aa	aa	ab	ab	bb	aa	ab	aa	bb	aa	aa	bb	ab	ab	bb	bb	aa	bb	bb	ab	aa	bb	bb	bb	ab	aa	aa	bb	ab	ab	aa	bb	ab
A07	12.25	Block7721	aaxbb	ab	ab	bb	aa	ab	ab	aa	aa	ab	bb	aa	ab	bb	aa	aa	ab	ab	bb	aa	ab	aa	bb	aa	aa	bb	ab	ab	bb	bb	aa	bb	ab	ab	aa	bb	bb	bb	ab	aa	aa	bb	ab	ab	aa	bb	ab
A07	12.25	Block7715	aaxbb	ab	ab	bb	aa	ab	ab	aa	aa	ab	bb	aa	ab	bb	aa	aa	ab	ab	bb	aa	ab	aa	bb	aa	aa	bb	ab	ab	bb	bb	aa	bb	ab	ab	aa	bb	bb	bb	ab	aa	aa	bb	ab	ab	aa	bb	ab
A07	12.75	Block7719	aaxbb	ab	bb	bb	aa	ab	ab	aa	aa	ab	bb	aa	ab	bb	aa	aa	ab	ab	bb	aa	ab	aa	bb	aa	aa	bb	ab	ab	bb	bb	aa	bb	bb	ab	aa	bb	bb	bb	ab	aa	aa	bb	ab	ab	aa	bb	ab
A07	12.75	Block7711	aaxbb	ab	bb	bb	aa	ab	ab	aa	aa	ab	bb	aa	ab	bb	aa	aa	ab	ab	bb	aa	ab	aa	bb	aa	aa	bb	ab	ab	bb	bb	aa	bb	bb	ab	aa	bb	bb	bb	ab	aa	aa	bb	ab	ab	aa	bb	ab
A07	13	Block7724	aaxbb	ab	bb	bb	aa	ab	ab	aa	aa	ab	bb	aa	ab	bb	aa	aa	ab	ab	bb	aa	ab	aa	bb	aa	aa	bb	ab	ab	bb	bb	aa	bb	bb	ab	aa	bb	bb	bb	ab	aa	aa	bb	ab	ab	aa	bb	ab
A07	13.751	Block7730	aaxbb	ab	ab	bb	aa	ab	ab	aa	aa	ab	bb	aa	ab	bb	aa	aa	ab	ab	ab	aa	ab	aa	bb	aa	aa	bb	ab	ab	bb	bb	aa	bb	bb	ab	aa	bb	bb	bb	ab	aa	aa	bb	ab	ab	aa	bb	ab
A07	14.001	Block7732	aaxbb	ab	ab	bb	aa	bb	ab	aa	aa	ab	bb	aa	ab	bb	aa	aa	ab	ab	ab	aa	ab	aa	bb	aa	aa	bb	ab	ab	bb	bb	aa	bb	bb	ab	aa	bb	bb	bb	ab	aa	aa	bb	ab	ab	aa	bb	ab
A07	14.501	Block7744	aaxbb	ab	ab	bb	aa	bb	ab	aa	aa	ab	bb	aa	ab	bb	aa	ab	ab	ab	ab	aa	ab	aa	bb	aa	aa	bb	ab	ab	bb	bb	aa	bb	bb	ab	aa	bb	bb	bb	ab	aa	aa	bb	ab	ab	aa	bb	ab
A07	14.501	Block7740	aaxbb	ab	ab	bb	aa	bb	ab	aa	aa	ab	bb	aa	ab	bb	aa	ab	ab	ab	ab	aa	ab	aa	bb	aa	aa	bb	ab	ab	bb	bb	aa	bb	bb	ab	aa	bb	bb	bb	ab	aa	aa	bb	ab	ab	aa	bb	ab
A07	14.501	Block7738	aaxbb	ab	ab	bb	aa	bb	ab	aa	aa	ab	bb	aa	ab	bb	aa	ab	ab	ab	ab	aa	ab	aa	bb	aa	aa	bb	ab	ab	bb	bb	aa	bb	bb	ab	aa	bb	bb	bb	ab	aa	aa	bb	ab	ab	aa	bb	ab
A07	14.751	Block7741	aaxbb	ab	bb	bb	aa	bb	ab	aa	aa	ab	bb	aa	ab	bb	aa	ab	ab	ab	ab	aa	ab	aa	bb	aa	aa	bb	ab	ab	bb	bb	aa	bb	bb	ab	aa	bb	bb	bb	ab	aa	aa	bb	ab	ab	aa	bb	ab
A07	14.751	Block7739	aaxbb	ab	bb	bb	aa	bb	ab	aa	aa	ab	bb	aa	ab	bb	aa	ab	ab	ab	ab	aa	ab	aa	bb	aa	aa	bb	ab	ab	bb	bb	aa	bb	bb	ab	aa	bb	bb	bb	ab	aa	aa	bb	ab	ab	aa	bb	ab
A07	15.251	Block7743	aaxbb	ab	ab	bb	aa	bb	ab	aa	aa	ab	bb	aa	ab	bb	aa	ab	ab	ab	ab	aa	ab	aa	bb	aa	aa	bb	ab	ab	bb	bb	aa	bb	ab	ab	aa	bb	bb	bb	ab	aa	aa	bb	ab	ab	aa	bb	ab
A07	15.251	Block7737	aaxbb	ab	ab	bb	aa	bb	ab	aa	aa	ab	bb	aa	ab	bb	aa	ab	ab	ab	ab	aa	ab	aa	bb	aa	aa	bb	ab	ab	bb	bb	aa	bb	ab	ab	aa	bb	bb	bb	ab	aa	aa	bb	ab	ab	aa	bb	ab
A07	15.501	Block7746	aaxbb	ab	ab	bb	aa	bb	ab	aa	aa	ab	bb	aa	ab	bb	aa	ab	ab	ab	ab	aa	ab	aa	bb	aa	aa	bb	ab	ab	bb	bb	aa	bb	ab	ab	aa	bb	bb	bb	ab	aa	aa	bb	aa	ab	aa	bb	ab
A07	15.751	Block7747	aaxbb	ab	bb	bb	aa	bb	ab	aa	aa	ab	bb	aa	ab	bb	aa	ab	ab	ab	ab	aa	ab	aa	bb	aa	aa	bb	ab	ab	bb	bb	aa	bb	ab	ab	aa	bb	bb	bb	ab	aa	aa	bb	aa	ab	aa	bb	ab
A07	16.001	Block7748	aaxbb	ab	bb	bb	aa	bb	ab	aa	aa	ab	bb	aa	ab	bb	aa	ab	ab	ab	ab	aa	ab	aa	bb	aa	aa	bb	ab	ab	bb	bb	aa	bb	ab	ab	aa	bb	bb	bb	ab	aa	aa	bb	aa	ab	aa	bb	ab
A07	16.501	Block7750	aaxbb	ab	ab	bb	aa	bb	ab	aa	aa	ab	bb	aa	ab	bb	aa	ab	ab	ab	ab	aa	ab	aa	bb	aa	aa	bb	ab	ab	bb	bb	aa	bb	ab	ab	aa	bb	bb	bb	ab	aa	aa	bb	aa	ab	aa	bb	ab
A07	16.751	Block7751	aaxbb	ab	bb	bb	aa	bb	ab	aa	aa	ab	bb	aa	ab	bb	aa	ab	ab	ab	ab	aa	ab	aa	bb	aa	aa	bb	ab	ab	bb	bb	aa	bb	ab	ab	aa	bb	bb	bb	ab	aa	aa	bb	aa	ab	aa	bb	ab
A07	17.501	Block7754	aaxbb	ab	bb	bb	aa	bb	ab	aa	aa	ab	bb	aa	ab	bb	aa	ab	ab	ab	ab	aa	ab	aa	bb	aa	aa	bb	ab	ab	bb	bb	aa	bb	ab	ab	aa	bb	bb	bb	ab	aa	aa	bb	aa	ab	aa	bb	ab
A07	18.251	Block7755	aaxbb	ab	bb	bb	aa	bb	ab	aa	aa	ab	bb	aa	ab	bb	aa	ab	ab	ab	ab	aa	ab	aa	bb	aa	aa	bb	ab	ab	bb	bb	aa	bb	ab	ab	aa	bb	bb	bb	ab	aa	aa	bb	aa	ab	aa	bb	ab
A07	18.602	Block7756	aaxbb	ab	bb	bb	aa	bb	ab	aa	aa	ab	bb	aa	ab	bb	aa	ab	ab	ab	ab	aa	ab	aa	bb	aa	aa	bb	ab	ab	bb	bb	aa	bb	ab	ab	aa	bb	bb	bb	ab	aa	aa	bb	aa	ab	aa	bb	ab
A07	19.102	Block7757	aaxbb	ab	bb	bb	aa	bb	ab	aa	aa	ab	bb	aa	ab	bb	aa	ab	ab	ab	ab	aa	ab	aa	bb	aa	aa	bb	ab	ab	bb	bb	aa	bb	ab	ab	aa	bb	bb	bb	ab	aa	aa	bb	aa	ab	aa	bb	ab
A07	19.352	Block7758	aaxbb	ab	bb	bb	aa	bb	ab	aa	aa	ab	bb	aa	ab	bb	aa	ab	ab	ab	ab	aa	ab	aa	ab	aa	aa	bb	ab	ab	bb	bb	aa	bb	ab	ab	aa	bb	bb	bb	ab	aa	aa	bb	aa	ab	aa	bb	ab
A07	20.102	Block7761	aaxbb	ab	ab	bb	aa	bb	ab	aa	aa	ab	bb	aa	ab	bb	aa	ab	ab	ab	ab	aa	ab	aa	ab	aa	aa	bb	ab	ab	bb	bb	aa	ab	ab	ab	aa	bb	bb	bb	ab	aa	aa	bb	aa	ab	aa	bb	ab
A07	31.08	Block7787	aaxbb	ab	ab	bb	aa	bb	ab	aa	aa	ab	ab	ab	aa	bb	ab	ab	ab	ab	ab	aa	ab	aa	ab	aa	ab	bb	aa	bb	bb	bb	aa	ab	ab	ab	aa	bb	bb	bb	ab	bb	aa	ab	aa	ab	aa	bb	ab
A07	31.33	Block7788	aaxbb	ab	bb	bb	aa	bb	ab	aa	aa	ab	ab	ab	aa	bb	ab	ab	ab	ab	ab	aa	ab	aa	ab	aa	ab	bb	aa	bb	bb	bb	aa	ab	ab	ab	aa	bb	bb	bb	ab	bb	aa	ab	aa	ab	aa	bb	ab
A07	31.58	Block7791	aaxbb	ab	bb	bb	aa	bb	ab	aa	aa	ab	ab	ab	aa	bb	ab	ab	ab	ab	ab	aa	ab	aa	ab	aa	ab	bb	aa	bb	bb	bb	aa	ab	ab	ab	aa	bb	bb	bb	ab	bb	aa	ab	aa	ab	aa	bb	ab
A07	31.58	Block7789	aaxbb	ab	bb	bb	aa	bb	ab	aa	aa	ab	ab	ab	aa	bb	ab	ab	ab	ab	ab	aa	ab	aa	ab	aa	ab	bb	aa	bb	bb	bb	aa	ab	ab	ab	aa	bb	bb	bb	ab	bb	aa	ab	aa	ab	aa	bb	ab
A07	31.83	Block7790	aaxbb	ab	ab	bb	aa	bb	ab	aa	aa	ab	ab	ab	aa	bb	ab	ab	ab	ab	ab	aa	ab	aa	ab	aa	ab	bb	aa	bb	bb	bb	aa	ab	ab	ab	aa	bb	bb	bb	ab	bb	aa	ab	aa	ab	aa	bb	ab
A07	32.33	Block7792	aaxbb	ab	bb	bb	aa	bb	ab	aa	aa	ab	ab	ab	aa	bb	ab	ab	ab	ab	ab	aa	ab	aa	ab	aa	ab	bb	aa	bb	bb	bb	aa	ab	ab	ab	aa	bb	bb	bb	ab	bb	aa	ab	aa	ab	aa	bb	ab
A07	32.58	Block7793	aaxbb	ab	bb	bb	aa	bb	ab	aa	aa	ab	ab	ab	aa	bb	ab	ab	ab	ab	ab	aa	ab	aa	ab	aa	ab	bb	aa	bb	bb	bb	aa	ab	ab	ab	aa	bb	bb	bb	ab	bb	aa	ab	aa	ab	aa	bb	ab
A07	32.83	Block7798	aaxbb	ab	bb	bb	aa	bb	ab	aa	aa	ab	ab	ab	aa	bb	ab	ab	ab	ab	ab	aa	ab	aa	ab	aa	ab	bb	aa	bb	bb	bb	aa	ab	ab	ab	aa	bb	bb	bb	ab	bb	aa	ab	aa	ab	aa	bb	ab
A07	32.83	Block7794	aaxbb	ab	bb	bb	aa	bb	ab	aa	aa	ab	ab	ab	aa	bb	ab	ab	ab	ab	ab	aa	ab	aa	ab	aa	ab	bb	aa	bb	bb	bb	aa	ab	ab	ab	aa	bb	bb	bb	ab	bb	aa	ab	aa	ab	aa	bb	ab
A07	33.08	Block7796	aaxbb	ab	ab	bb	aa	bb	ab	aa	aa	ab	ab	ab	aa	bb	ab	ab	ab	ab	ab	aa	ab	aa	ab	aa	ab	bb	aa	bb	bb	bb	aa	ab	ab	ab	aa	bb	bb	bb	ab	bb	aa	ab	aa	ab	aa	bb	ab
A07	33.33	Block7800	aaxbb	ab	ab	bb	aa	bb	ab	aa	aa	ab	ab	ab	aa	bb	ab	ab	ab	ab	ab	aa	ab	aa	ab	aa	ab	bb	aa	bb	bb	bb	aa	ab	ab	ab	aa	bb	bb	bb	ab	bb	aa	ab	aa	ab	aa	bb	ab
A07	33.58	Block7801	aaxbb	ab	bb	bb	aa	bb	ab	aa	aa	ab	ab	ab	aa	bb	ab	ab	ab	ab	ab	aa	ab	aa	ab	aa	ab	bb	aa	bb	bb	bb	aa	ab	ab	ab	aa	bb	bb	bb	ab	bb	aa	ab	aa	ab	aa	bb	ab
A07	33.83	Block7806	aaxbb	ab	bb	bb	aa	bb	ab	aa	aa	ab	ab	ab	aa	bb	ab	ab	ab	ab	ab	aa	ab	aa	ab	aa	ab	bb	aa	bb	bb	bb	aa	ab	ab	ab	aa	bb	bb	bb	ab	bb	aa	ab	aa	ab	aa	bb	ab
A07	34.08	Block7807	aaxbb	ab	bb	bb	aa	bb	ab	aa	aa	ab	ab	ab	aa	bb	ab	ab	ab	ab	ab	aa	ab	aa	ab	aa	ab	bb	aa	bb	bb	bb	aa	ab	ab	ab	aa	bb	bb	bb	ab	bb	aa	ab	aa	ab	aa	bb	ab
A07	34.33	Block7810	aaxbb	ab	bb	bb	aa	bb	ab	aa	aa	ab	ab	ab	aa	bb	ab	ab	ab	ab	ab	aa	ab	aa	ab	aa	ab	bb	aa	bb	bb	bb	aa	ab	ab	ab	aa	bb	bb	bb	ab	bb	aa	ab	aa	ab	aa	bb	ab
A07	34.33	Block7808	aaxbb	ab	bb	bb	aa	bb	ab	aa	aa	ab	ab	ab	aa	bb	ab	ab	ab	ab	ab	aa	ab	aa	ab	aa	ab	bb	aa	bb	bb	bb	aa	ab	ab	ab	aa	bb	bb	bb	ab	bb	aa	ab	aa	ab	aa	bb	ab
A07	34.83	Block7812	aaxbb	ab	bb	bb	aa	bb	ab	aa	aa	ab	ab	ab	aa	bb	ab	ab	ab	ab	ab	aa	ab	aa	ab	aa	ab	bb	aa	bb	bb	bb	aa	ab	ab	ab	aa	bb	bb	bb	aa	bb	aa	ab	aa	ab	aa	bb	ab
A07	35.08	Block7813	aaxbb	ab	bb	bb	aa	bb	ab	aa	aa	ab	ab	ab	ab	bb	ab	ab	ab	ab	ab	aa	ab	aa	ab	aa	ab	bb	aa	bb	bb	bb	aa	ab	ab	ab	aa	bb	bb	bb	aa	bb	aa	ab	aa	ab	aa	bb	ab
A07	35.33	Block7814	aaxbb	ab	bb	bb	aa	bb	ab	aa	aa	ab	ab	ab	ab	bb	ab	ab	ab	ab	ab	aa	ab	aa	ab	aa	ab	bb	aa	bb	bb	bb	aa	ab	ab	ab	aa	bb	bb	bb	aa	bb	aa	ab	aa	ab	aa	bb	ab
A07	35.58	Block7820	aaxbb	ab	bb	bb	aa	bb	ab	aa	aa	ab	ab	ab	ab	bb	ab	ab	ab	ab	ab	aa	ab	aa	ab	aa	ab	bb	aa	bb	bb	bb	aa	ab	ab	ab	aa	bb	bb	bb	aa	bb	aa	ab	aa	ab	aa	bb	ab
A07	35.83	Block7819	aaxbb	ab	ab	bb	aa	bb	ab	aa	aa	ab	ab	ab	ab	bb	ab	ab	ab	ab	ab	aa	ab	aa	ab	aa	ab	bb	aa	bb	bb	bb	aa	ab	ab	ab	aa	bb	bb	bb	aa	bb	aa	ab	aa	ab	aa	bb	ab
A07	35.83	Block7815	aaxbb	ab	ab	bb	aa	bb	ab	aa	aa	ab	ab	ab	ab	bb	ab	ab	ab	ab	ab	aa	ab	aa	ab	aa	ab	bb	aa	bb	bb	bb	aa	ab	ab	ab	aa	bb	bb	bb	aa	bb	aa	ab	aa	ab	aa	bb	ab
A07	36.33	Block7823	aaxbb	ab	ab	bb	aa	bb	ab	aa	aa	ab	ab	ab	ab	bb	ab	ab	ab	ab	ab	aa	ab	aa	ab	aa	ab	bb	aa	bb	bb	bb	aa	ab	ab	ab	aa	bb	bb	bb	aa	bb	aa	ab	aa	ab	aa	bb	ab
A07	36.58	Block7824	aaxbb	ab	ab	bb	aa	bb	ab	aa	aa	ab	ab	ab	ab	bb	ab	ab	ab	ab	ab	aa	ab	aa	ab	aa	ab	bb	aa	bb	bb	bb	aa	ab	ab	ab	aa	bb	bb	bb	aa	bb	aa	ab	aa	ab	aa	bb	ab
A07	37.08	Block7830	aaxbb	ab	ab	bb	aa	bb	ab	aa	aa	ab	ab	ab	ab	bb	ab	ab	ab	ab	ab	aa	ab	aa	ab	aa	ab	bb	aa	bb	bb	bb	aa	ab	ab	ab	aa	bb	bb	bb	aa	bb	aa	ab	aa	ab	aa	bb	ab
A07	37.08	Block7829	aaxbb	ab	ab	bb	aa	bb	ab	aa	aa	ab	ab	ab	ab	bb	ab	ab	ab	ab	ab	aa	ab	aa	ab	aa	ab	bb	aa	bb	bb	bb	aa	ab	ab	ab	aa	bb	bb	bb	aa	bb	aa	ab	aa	ab	aa	bb	ab
A07	37.08	Block7826	aaxbb	ab	ab	bb	aa	bb	ab	aa	aa	ab	ab	ab	ab	bb	ab	ab	ab	ab	ab	aa	ab	aa	ab	aa	ab	bb	aa	bb	bb	bb	aa	ab	ab	ab	aa	bb	bb	bb	aa	bb	aa	ab	aa	ab	aa	bb	ab
A07	37.33	Block7827	aaxbb	ab	bb	bb	aa	bb	ab	aa	aa	ab	ab	ab	ab	bb	ab	ab	ab	ab	ab	aa	ab	aa	ab	aa	ab	bb	aa	bb	bb	bb	aa	ab	ab	ab	aa	bb	bb	bb	aa	bb	aa	ab	aa	ab	aa	bb	ab
A07	37.83	Block7835	aaxbb	ab	ab	bb	aa	bb	ab	aa	aa	ab	ab	ab	ab	bb	ab	ab	ab	ab	ab	aa	ab	aa	ab	aa	ab	bb	aa	bb	bb	bb	aa	ab	ab	ab	aa	bb	bb	bb	aa	bb	aa	ab	aa	ab	aa	bb	ab
A07	37.83	Block7832	aaxbb	ab	ab	bb	aa	bb	ab	aa	aa	ab	ab	ab	ab	bb	ab	ab	ab	ab	ab	aa	ab	aa	ab	aa	ab	bb	aa	bb	bb	bb	aa	ab	ab	ab	aa	bb	bb	bb	aa	bb	aa	ab	aa	ab	aa	bb	ab
A07	37.83	Block7831	aaxbb	ab	ab	bb	aa	bb	ab	aa	aa	ab	ab	ab	ab	bb	ab	ab	ab	ab	ab	aa	ab	aa	ab	aa	ab	bb	aa	bb	bb	bb	aa	ab	ab	ab	aa	bb	bb	bb	aa	bb	aa	ab	aa	ab	aa	bb	ab
A07	38.08	Block7836	aaxbb	ab	ab	bb	aa	bb	ab	aa	aa	ab	ab	ab	ab	bb	ab	ab	ab	ab	ab	aa	ab	aa	ab	aa	ab	bb	aa	bb	bb	bb	aa	ab	ab	ab	aa	ab	bb	bb	aa	bb	aa	ab	aa	ab	aa	bb	ab
A07	38.33	Block7837	aaxbb	ab	ab	bb	aa	bb	ab	aa	aa	ab	ab	ab	ab	bb	ab	ab	ab	ab	ab	aa	ab	aa	ab	aa	ab	bb	aa	bb	bb	bb	aa	ab	ab	ab	aa	ab	bb	bb	aa	bb	aa	ab	aa	ab	aa	bb	ab
A07	38.58	Block7838	aaxbb	ab	ab	bb	aa	bb	ab	aa	aa	ab	ab	ab	ab	bb	ab	ab	ab	ab	ab	aa	ab	aa	ab	aa	ab	bb	aa	bb	bb	bb	aa	ab	ab	ab	aa	ab	bb	bb	aa	bb	aa	ab	aa	ab	aa	bb	ab
A07	39.08	Block7842	aaxbb	ab	ab	bb	aa	bb	ab	aa	aa	ab	ab	ab	ab	bb	ab	ab	ab	ab	ab	aa	ab	aa	ab	aa	ab	bb	aa	bb	bb	bb	aa	ab	ab	ab	aa	ab	bb	bb	aa	bb	aa	ab	aa	ab	aa	bb	ab
A07	39.33	Block7841	aaxbb	ab	bb	bb	aa	bb	ab	aa	aa	ab	ab	ab	ab	bb	ab	ab	ab	ab	ab	aa	ab	aa	ab	aa	ab	bb	aa	bb	bb	bb	aa	ab	ab	ab	aa	ab	bb	bb	aa	bb	aa	ab	aa	ab	aa	bb	ab
A07	39.83	Block7843	aaxbb	ab	ab	bb	aa	bb	ab	aa	aa	ab	ab	ab	ab	bb	ab	ab	ab	ab	ab	aa	ab	aa	ab	aa	ab	bb	aa	bb	bb	ab	aa	ab	ab	ab	aa	ab	bb	bb	aa	bb	aa	ab	aa	ab	aa	bb	ab
A07	40.08	Block7846	aaxbb	ab	bb	bb	aa	bb	ab	aa	aa	ab	ab	ab	ab	bb	ab	ab	ab	ab	ab	aa	ab	aa	ab	aa	ab	bb	aa	bb	bb	ab	aa	ab	ab	ab	aa	ab	bb	bb	aa	bb	aa	ab	aa	ab	aa	bb	ab
A07	40.08	Block7844	aaxbb	ab	bb	bb	aa	bb	ab	aa	aa	ab	ab	ab	ab	bb	ab	ab	ab	ab	ab	aa	ab	aa	ab	aa	ab	bb	aa	bb	bb	ab	aa	ab	ab	ab	aa	ab	bb	bb	aa	bb	aa	ab	aa	ab	aa	bb	ab
A07	40.58	Block7847	aaxbb	ab	bb	bb	aa	bb	ab	aa	aa	ab	ab	ab	ab	bb	ab	ab	ab	ab	ab	aa	ab	aa	ab	aa	ab	bb	aa	bb	bb	ab	aa	ab	ab	ab	aa	ab	bb	bb	aa	bb	aa	ab	aa	ab	aa	bb	ab
A07	41.881	Block7850	aaxbb	ab	bb	bb	aa	bb	ab	aa	aa	ab	ab	ab	ab	bb	ab	ab	ab	ab	ab	aa	ab	aa	ab	aa	ab	bb	aa	bb	bb	ab	aa	ab	ab	ab	aa	ab	bb	bb	aa	bb	aa	ab	aa	ab	aa	bb	ab
A07	43.482	Block7854	aaxbb	aa	bb	aa	aa	bb	aa	aa	aa	ab	ab	ab	ab	bb	ab	ab	ab	ab	ab	aa	ab	aa	ab	aa	aa	bb	aa	bb	bb	ab	aa	ab	ab	ab	aa	ab	bb	bb	aa	bb	aa	ab	aa	ab	aa	bb	ab
A07	49.177	Block7861	aaxbb	aa	ab	aa	aa	aa	aa	aa	aa	aa	aa	aa	aa	aa	aa	aa	aa	aa	aa	aa	aa	aa	aa	aa	aa	aa	aa	aa	bb	ab	aa	ab	ab	ab	aa	ab	bb	bb	aa	bb	aa	aa	aa	ab	aa	bb	ab
A07	50.178	Block7864	aaxbb	aa	ab	aa	aa	aa	aa	aa	aa	aa	aa	aa	aa	aa	aa	aa	aa	aa	aa	aa	aa	aa	aa	aa	aa	aa	aa	aa	bb	ab	aa	ab	ab	ab	aa	ab	bb	bb	aa	bb	aa	aa	aa	ab	aa	bb	ab
A07	50.678	Block7868	aaxbb	aa	ab	aa	aa	aa	aa	aa	aa	aa	aa	aa	aa	aa	aa	aa	aa	aa	aa	aa	aa	aa	aa	aa	aa	aa	aa	aa	bb	ab	aa	ab	ab	ab	aa	ab	bb	bb	aa	bb	aa	aa	aa	ab	aa	bb	ab
A07	50.678	Block7867	aaxbb	aa	ab	aa	aa	aa	aa	aa	aa	aa	aa	aa	aa	aa	aa	aa	aa	aa	aa	aa	aa	aa	aa	aa	aa	aa	aa	aa	bb	ab	aa	ab	ab	ab	aa	ab	bb	bb	aa	bb	aa	aa	aa	ab	aa	bb	ab
A07	53.23	Block7872	aaxbb	ab	ab	aa	aa	ab	ab	aa	ab	aa	aa	aa	ab	aa	ab	aa	ab	ab	aa	aa	aa	ab	aa	aa	aa	aa	aa	aa	bb	ab	aa	ab	ab	ab	aa	ab	bb	bb	aa	bb	aa	aa	aa	ab	aa	bb	ab
A07	54.23	Block7874	aaxbb	ab	ab	aa	aa	ab	ab	aa	ab	aa	aa	aa	ab	aa	ab	aa	ab	ab	aa	aa	aa	ab	ab	aa	ab	aa	aa	aa	bb	ab	aa	ab	ab	ab	aa	ab	bb	bb	aa	bb	aa	aa	aa	ab	aa	bb	ab
A07	55.23	Block7875	aaxbb	ab	ab	aa	aa	ab	ab	aa	ab	aa	aa	aa	ab	aa	ab	aa	ab	ab	ab	aa	aa	ab	ab	ab	ab	aa	aa	aa	bb	ab	aa	ab	ab	ab	aa	ab	bb	bb	aa	bb	aa	aa	aa	ab	aa	bb	ab
A07	62.033	Block7896	aaxbb	ab	ab	ab	aa	ab	ab	aa	ab	ab	ab	ab	ab	bb	ab	ab	ab	ab	aa	aa	aa	ab	aa	ab	ab	ab	aa	bb	bb	ab	ab	ab	ab	ab	aa	ab	bb	bb	aa	bb	aa	aa	aa	ab	aa	bb	ab
A07	63.033	Block7899	aaxbb	ab	ab	ab	aa	ab	ab	aa	ab	ab	ab	ab	ab	bb	ab	ab	ab	ab	aa	aa	ab	ab	aa	ab	ab	ab	aa	bb	bb	ab	ab	ab	ab	ab	aa	ab	bb	bb	aa	bb	aa	aa	aa	ab	aa	bb	ab
A07	65.084	Block7902	aaxbb	ab	ab	ab	aa	bb	ab	aa	ab	ab	ab	bb	ab	bb	ab	ab	ab	ab	aa	aa	ab	ab	aa	bb	ab	ab	aa	bb	bb	ab	bb	ab	ab	ab	aa	ab	bb	bb	aa	bb	aa	aa	aa	ab	aa	bb	ab
A07	66.085	Block7905	aaxbb	ab	ab	ab	aa	bb	ab	aa	ab	bb	ab	bb	ab	bb	ab	ab	ab	ab	aa	aa	ab	ab	aa	bb	ab	ab	aa	bb	bb	ab	bb	ab	ab	bb	aa	ab	bb	bb	aa	bb	aa	aa	aa	ab	aa	bb	ab
A07	67.635	Block7909	aaxbb	ab	ab	ab	aa	bb	ab	aa	ab	bb	ab	bb	ab	bb	ab	ab	ab	ab	aa	aa	ab	ab	aa	bb	ab	ab	aa	bb	bb	ab	bb	ab	ab	bb	aa	ab	ab	bb	aa	bb	aa	aa	aa	ab	ab	bb	ab
A07	68.635	Block7913	aaxbb	ab	ab	ab	aa	bb	ab	aa	ab	bb	ab	bb	ab	bb	ab	ab	ab	ab	aa	aa	ab	ab	aa	bb	ab	ab	aa	bb	bb	ab	bb	ab	ab	bb	aa	ab	ab	bb	aa	bb	aa	aa	aa	aa	ab	bb	ab
A07	69.135	Block7915	aaxbb	ab	ab	ab	aa	bb	ab	aa	ab	bb	ab	bb	ab	bb	ab	ab	ab	ab	ab	aa	ab	ab	aa	bb	ab	ab	aa	bb	bb	ab	bb	ab	ab	bb	aa	ab	ab	bb	aa	bb	aa	aa	aa	aa	ab	bb	ab
A07	69.385	Block7916	aaxbb	ab	ab	ab	aa	bb	ab	aa	ab	bb	ab	bb	ab	bb	ab	ab	ab	ab	ab	aa	ab	ab	aa	bb	ab	ab	aa	bb	bb	ab	bb	ab	ab	bb	aa	ab	ab	bb	aa	bb	aa	aa	aa	aa	ab	bb	ab
A07	70.135	Block7925	aaxbb	ab	ab	ab	aa	bb	ab	aa	ab	bb	ab	bb	ab	bb	ab	ab	ab	ab	ab	aa	ab	ab	aa	bb	ab	ab	aa	bb	bb	ab	bb	ab	ab	bb	aa	ab	ab	bb	aa	bb	aa	aa	aa	aa	ab	bb	ab
A07	70.385	Block7926	aaxbb	ab	ab	ab	aa	bb	ab	aa	ab	bb	ab	bb	ab	bb	ab	ab	ab	ab	ab	aa	ab	ab	aa	bb	ab	ab	aa	bb	bb	ab	bb	ab	ab	bb	ab	ab	ab	bb	aa	bb	aa	aa	aa	aa	ab	bb	ab
A07	72.186	Block7931	aaxbb	ab	ab	ab	aa	bb	ab	aa	ab	bb	aa	bb	ab	bb	ab	ab	ab	ab	ab	aa	ab	ab	aa	bb	bb	ab	aa	bb	bb	ab	bb	ab	ab	bb	ab	ab	ab	bb	aa	bb	aa	aa	aa	aa	ab	bb	ab
A07	72.436	Block7932	aaxbb	ab	ab	ab	aa	bb	ab	aa	ab	bb	aa	bb	ab	bb	ab	ab	ab	ab	ab	aa	ab	ab	aa	bb	bb	ab	aa	bb	bb	ab	bb	ab	ab	bb	ab	ab	ab	bb	aa	bb	aa	aa	aa	aa	ab	bb	ab
A07	73.436	Block7936	aaxbb	ab	ab	ab	aa	bb	ab	aa	ab	bb	aa	bb	ab	bb	ab	ab	ab	ab	ab	aa	ab	ab	aa	bb	bb	ab	aa	bb	bb	ab	bb	ab	ab	bb	ab	ab	aa	bb	aa	bb	aa	aa	aa	aa	ab	bb	ab
A07	75.738	Block7997	aaxbb	ab	ab	ab	aa	bb	ab	aa	ab	bb	aa	bb	ab	bb	ab	ab	ab	ab	ab	aa	ab	ab	aa	bb	bb	ab	aa	ab	ab	ab	bb	ab	ab	bb	ab	ab	aa	bb	aa	bb	aa	aa	aa	aa	ab	bb	ab
A07	77.539	Block8125	aaxbb	ab	ab	ab	aa	bb	ab	ab	ab	bb	ab	bb	ab	ab	ab	ab	ab	ab	ab	aa	ab	ab	aa	bb	bb	ab	aa	ab	ab	ab	bb	ab	ab	bb	ab	ab	aa	bb	aa	bb	aa	aa	aa	aa	ab	bb	ab
A07	78.289	Block8210	aaxbb	ab	ab	ab	aa	bb	ab	ab	ab	bb	ab	bb	ab	ab	aa	ab	ab	ab	ab	aa	ab	ab	aa	bb	bb	ab	aa	ab	ab	ab	bb	ab	ab	bb	ab	ab	aa	bb	aa	bb	aa	aa	aa	aa	ab	bb	ab
A07	78.539	Block8216	aaxbb	ab	ab	ab	aa	bb	ab	ab	ab	bb	ab	bb	ab	ab	aa	ab	ab	ab	ab	aa	ab	ab	aa	bb	bb	ab	aa	ab	ab	ab	bb	ab	ab	bb	ab	ab	aa	bb	aa	bb	aa	aa	aa	aa	ab	bb	ab
A07	78.789	Block8217	aaxbb	ab	ab	ab	aa	bb	ab	ab	ab	bb	ab	bb	ab	ab	aa	ab	ab	ab	bb	aa	ab	ab	aa	bb	bb	ab	aa	ab	ab	ab	bb	ab	ab	bb	ab	ab	aa	bb	aa	bb	aa	aa	aa	aa	ab	bb	ab
A07	79.64	Block8231	aaxbb	ab	aa	ab	aa	bb	ab	ab	ab	bb	ab	bb	ab	ab	aa	ab	ab	ab	bb	aa	aa	ab	aa	bb	bb	ab	aa	ab	ab	ab	bb	ab	ab	bb	ab	ab	aa	bb	aa	bb	aa	aa	aa	aa	ab	bb	ab
A07	80.14	Block8240	aaxbb	ab	ab	ab	aa	bb	ab	ab	ab	bb	ab	bb	ab	ab	aa	ab	ab	ab	bb	aa	aa	ab	aa	bb	bb	ab	aa	ab	ab	ab	bb	ab	ab	bb	ab	ab	aa	bb	aa	bb	aa	aa	aa	aa	ab	bb	ab
A07	80.39	Block8241	aaxbb	aa	ab	ab	aa	bb	ab	ab	ab	bb	ab	bb	ab	ab	aa	ab	ab	ab	bb	aa	aa	ab	aa	bb	bb	ab	aa	ab	ab	ab	bb	ab	ab	bb	ab	ab	aa	bb	aa	bb	aa	aa	aa	aa	ab	bb	ab
A07	80.64	Block8242	aaxbb	aa	ab	ab	aa	bb	ab	ab	ab	bb	ab	bb	ab	ab	aa	ab	ab	ab	bb	aa	aa	ab	aa	bb	bb	ab	aa	ab	ab	ab	bb	ab	ab	bb	ab	ab	aa	bb	aa	bb	aa	aa	aa	aa	ab	bb	ab
A07	80.89	Block8243	aaxbb	aa	ab	ab	aa	bb	ab	ab	ab	bb	ab	bb	ab	ab	aa	ab	ab	ab	bb	aa	aa	ab	aa	bb	bb	ab	aa	ab	ab	ab	bb	ab	ab	bb	ab	ab	aa	bb	aa	bb	aa	aa	aa	aa	ab	bb	ab
A07	81.39	Block8245	aaxbb	aa	aa	ab	aa	bb	ab	ab	ab	bb	ab	bb	ab	ab	aa	ab	ab	ab	bb	aa	aa	ab	aa	bb	bb	ab	aa	ab	ab	ab	bb	ab	ab	bb	ab	ab	aa	bb	aa	bb	aa	aa	aa	aa	ab	bb	ab
A07	81.64	Block8248	aaxbb	aa	ab	ab	aa	bb	ab	ab	ab	bb	ab	bb	ab	ab	aa	ab	ab	ab	bb	aa	aa	ab	aa	bb	bb	ab	aa	ab	ab	ab	bb	ab	ab	bb	ab	ab	aa	bb	aa	bb	aa	aa	aa	aa	ab	bb	ab
A07	81.64	Block8244	aaxbb	aa	ab	ab	aa	bb	ab	ab	ab	bb	ab	bb	ab	ab	aa	ab	ab	ab	bb	aa	aa	ab	aa	bb	bb	ab	aa	ab	ab	ab	bb	ab	ab	bb	ab	ab	aa	bb	aa	bb	aa	aa	aa	aa	ab	bb	ab
A07	82.14	Block8250	aaxbb	aa	ab	ab	aa	bb	ab	ab	ab	bb	ab	bb	ab	ab	aa	ab	ab	ab	bb	aa	aa	ab	aa	bb	bb	ab	aa	ab	ab	ab	bb	ab	ab	bb	ab	ab	aa	bb	aa	bb	aa	aa	aa	aa	ab	bb	ab
A07	82.39	Block8251	aaxbb	aa	ab	ab	aa	bb	ab	ab	ab	bb	ab	bb	ab	ab	aa	ab	ab	ab	bb	aa	aa	ab	aa	bb	bb	ab	ab	ab	ab	ab	bb	ab	ab	bb	ab	ab	aa	bb	aa	bb	aa	aa	aa	aa	ab	bb	ab
A07	82.64	Block8252	aaxbb	aa	ab	ab	aa	bb	ab	ab	ab	bb	ab	bb	ab	ab	aa	ab	ab	ab	bb	aa	aa	ab	aa	bb	bb	ab	ab	ab	ab	ab	bb	ab	ab	bb	ab	ab	aa	bb	aa	bb	aa	aa	aa	aa	ab	bb	ab
A07	82.89	Block8254	aaxbb	aa	ab	ab	aa	bb	ab	ab	ab	bb	ab	bb	ab	ab	aa	ab	ab	ab	bb	aa	aa	ab	aa	bb	bb	ab	ab	ab	ab	ab	bb	ab	ab	bb	ab	ab	aa	bb	aa	bb	aa	aa	aa	aa	ab	bb	ab
A07	83.14	Block8267	aaxbb	ab	ab	ab	aa	bb	ab	ab	ab	bb	ab	bb	ab	ab	aa	ab	ab	ab	bb	aa	aa	ab	aa	bb	bb	ab	ab	ab	ab	ab	bb	ab	ab	bb	ab	ab	aa	bb	aa	bb	aa	aa	aa	aa	ab	bb	ab
A07	83.14	Block8264	aaxbb	ab	ab	ab	aa	bb	ab	ab	ab	bb	ab	bb	ab	ab	aa	ab	ab	ab	bb	aa	aa	ab	aa	bb	bb	ab	ab	ab	ab	ab	bb	ab	ab	bb	ab	ab	aa	bb	aa	bb	aa	aa	aa	aa	ab	bb	ab
A07	83.14	Block8261	aaxbb	ab	ab	ab	aa	bb	ab	ab	ab	bb	ab	bb	ab	ab	aa	ab	ab	ab	bb	aa	aa	ab	aa	bb	bb	ab	ab	ab	ab	ab	bb	ab	ab	bb	ab	ab	aa	bb	aa	bb	aa	aa	aa	aa	ab	bb	ab
A07	83.39	Block8259	aaxbb	ab	aa	ab	aa	bb	ab	ab	ab	bb	ab	bb	ab	ab	aa	ab	ab	ab	bb	aa	aa	ab	aa	bb	bb	ab	ab	ab	ab	ab	bb	ab	ab	bb	ab	ab	aa	bb	aa	bb	aa	aa	aa	aa	ab	bb	ab
A07	83.39	Block8258	aaxbb	ab	aa	ab	aa	bb	ab	ab	ab	bb	ab	bb	ab	ab	aa	ab	ab	ab	bb	aa	aa	ab	aa	bb	bb	ab	ab	ab	ab	ab	bb	ab	ab	bb	ab	ab	aa	bb	aa	bb	aa	aa	aa	aa	ab	bb	ab
A08	0	Block8393	aaxbb	aa	ab	ab	ab	ab	bb	ab	aa	aa	ab	aa	ab	ab	ab	ab	aa	ab	ab	ab	ab	aa	ab	ab	ab	ab	aa	aa	ab	ab	aa	aa	ab	ab	ab	ab	aa	ab	ab	aa	ab	aa	ab	ab	aa	ab	aa
A08	0	Block8386	aaxbb	aa	ab	ab	ab	ab	bb	ab	aa	aa	ab	aa	ab	ab	ab	ab	aa	ab	ab	ab	ab	aa	ab	ab	ab	ab	aa	aa	ab	ab	aa	aa	ab	ab	ab	ab	aa	ab	ab	aa	ab	aa	ab	ab	aa	ab	aa
A08	0	Block8384	aaxbb	aa	ab	ab	ab	ab	bb	ab	aa	aa	ab	aa	ab	ab	ab	ab	aa	ab	ab	ab	ab	aa	ab	ab	ab	ab	aa	aa	ab	ab	aa	aa	ab	ab	ab	ab	aa	ab	ab	aa	ab	aa	ab	ab	aa	ab	aa
A08	0.8	Block8389	aaxbb	aa	ab	ab	ab	ab	bb	ab	aa	aa	ab	aa	ab	ab	ab	ab	aa	ab	ab	ab	ab	aa	ab	ab	ab	ab	aa	aa	ab	ab	aa	aa	ab	ab	ab	ab	aa	ab	ab	aa	ab	aa	ab	ab	aa	ab	aa
A08	0.8	Block8385	aaxbb	aa	ab	ab	ab	ab	bb	ab	aa	aa	ab	aa	ab	ab	ab	ab	aa	ab	ab	ab	ab	aa	ab	ab	ab	ab	aa	aa	ab	ab	aa	aa	ab	ab	ab	ab	aa	ab	ab	aa	ab	aa	ab	ab	aa	ab	aa
A08	0.8	Block8390	aaxbb	aa	ab	ab	ab	ab	bb	ab	aa	aa	ab	aa	ab	ab	ab	ab	aa	ab	ab	ab	ab	aa	ab	ab	ab	ab	aa	aa	ab	ab	aa	aa	ab	ab	ab	ab	aa	ab	ab	aa	ab	aa	ab	ab	aa	ab	aa
A08	1.6	Block8379	aaxbb	aa	ab	ab	ab	ab	bb	ab	aa	aa	ab	aa	ab	ab	ab	ab	aa	ab	ab	ab	ab	aa	ab	ab	ab	ab	aa	aa	ab	ab	aa	aa	ab	ab	ab	ab	aa	ab	ab	aa	ab	aa	ab	ab	aa	ab	aa
A08	1.6	Block8383	aaxbb	aa	ab	ab	ab	ab	bb	ab	aa	aa	ab	aa	ab	ab	ab	ab	aa	ab	ab	ab	ab	aa	ab	ab	ab	ab	aa	aa	ab	ab	aa	aa	ab	ab	ab	ab	aa	ab	ab	aa	ab	aa	ab	ab	aa	ab	aa
A08	2.4	Block8409	aaxbb	aa	ab	ab	ab	bb	bb	ab	aa	aa	ab	aa	ab	ab	ab	ab	aa	ab	ab	ab	ab	aa	ab	ab	ab	ab	aa	aa	ab	ab	aa	aa	ab	ab	ab	ab	aa	ab	ab	aa	ab	aa	ab	ab	aa	ab	aa
A08	2.4	Block8395	aaxbb	aa	ab	ab	ab	bb	bb	ab	aa	aa	ab	aa	ab	ab	ab	ab	aa	ab	ab	ab	ab	aa	ab	ab	ab	ab	aa	aa	ab	ab	aa	aa	ab	ab	ab	ab	aa	ab	ab	aa	ab	aa	ab	ab	aa	ab	aa
A08	2.4	Block8406	aaxbb	aa	ab	ab	ab	bb	bb	ab	aa	aa	ab	aa	ab	ab	ab	ab	aa	ab	ab	ab	ab	aa	ab	ab	ab	ab	aa	aa	ab	ab	aa	aa	ab	ab	ab	ab	aa	ab	ab	aa	ab	aa	ab	ab	aa	ab	aa
A08	2.4	Block8398	aaxbb	aa	ab	ab	ab	bb	bb	ab	aa	aa	ab	aa	ab	ab	ab	ab	aa	ab	ab	ab	ab	aa	ab	ab	ab	ab	aa	aa	ab	ab	aa	aa	ab	ab	ab	ab	aa	ab	ab	aa	ab	aa	ab	ab	aa	ab	aa
A08	2.4	Block8401	aaxbb	aa	ab	ab	ab	bb	bb	ab	aa	aa	ab	aa	ab	ab	ab	ab	aa	ab	ab	ab	ab	aa	ab	ab	ab	ab	aa	aa	ab	ab	aa	aa	ab	ab	ab	ab	aa	ab	ab	aa	ab	aa	ab	ab	aa	ab	aa
A08	2.4	Block8402	aaxbb	aa	ab	ab	ab	bb	bb	ab	aa	aa	ab	aa	ab	ab	ab	ab	aa	ab	ab	ab	ab	aa	ab	ab	ab	ab	aa	aa	ab	ab	aa	aa	ab	ab	ab	ab	aa	ab	ab	aa	ab	aa	ab	ab	aa	ab	aa
A08	2.4	Block8400	aaxbb	aa	ab	ab	ab	bb	bb	ab	aa	aa	ab	aa	ab	ab	ab	ab	aa	ab	ab	ab	ab	aa	ab	ab	ab	ab	aa	aa	ab	ab	aa	aa	ab	ab	ab	ab	aa	ab	ab	aa	ab	aa	ab	ab	aa	ab	aa
A08	2.4	Block8403	aaxbb	aa	ab	ab	ab	bb	bb	ab	aa	aa	ab	aa	ab	ab	ab	ab	aa	ab	ab	ab	ab	aa	ab	ab	ab	ab	aa	aa	ab	ab	aa	aa	ab	ab	ab	ab	aa	ab	ab	aa	ab	aa	ab	ab	aa	ab	aa
A08	2.4	Block8399	aaxbb	aa	ab	ab	ab	bb	bb	ab	aa	aa	ab	aa	ab	ab	ab	ab	aa	ab	ab	ab	ab	aa	ab	ab	ab	ab	aa	aa	ab	ab	aa	aa	ab	ab	ab	ab	aa	ab	ab	aa	ab	aa	ab	ab	aa	ab	aa
A08	2.4	Block8404	aaxbb	aa	ab	ab	ab	bb	bb	ab	aa	aa	ab	aa	ab	ab	ab	ab	aa	ab	ab	ab	ab	aa	ab	ab	ab	ab	aa	aa	ab	ab	aa	aa	ab	ab	ab	ab	aa	ab	ab	aa	ab	aa	ab	ab	aa	ab	aa
A08	2.4	Block8392	aaxbb	aa	ab	ab	ab	bb	bb	ab	aa	aa	ab	aa	ab	ab	ab	ab	aa	ab	ab	ab	ab	aa	ab	ab	ab	ab	aa	aa	ab	ab	aa	aa	ab	ab	ab	ab	aa	ab	ab	aa	ab	aa	ab	ab	aa	ab	aa
A08	2.4	Block8407	aaxbb	aa	ab	ab	ab	bb	bb	ab	aa	aa	ab	aa	ab	ab	ab	ab	aa	ab	ab	ab	ab	aa	ab	ab	ab	ab	aa	aa	ab	ab	aa	aa	ab	ab	ab	ab	aa	ab	ab	aa	ab	aa	ab	ab	aa	ab	aa
A08	2.4	Block8391	aaxbb	aa	ab	ab	ab	bb	bb	ab	aa	aa	ab	aa	ab	ab	ab	ab	aa	ab	ab	ab	ab	aa	ab	ab	ab	ab	aa	aa	ab	ab	aa	aa	ab	ab	ab	ab	aa	ab	ab	aa	ab	aa	ab	ab	aa	ab	aa
A08	3.7	Block8408	aaxbb	aa	ab	ab	ab	bb	bb	ab	aa	aa	ab	aa	ab	ab	aa	ab	aa	ab	ab	ab	ab	aa	ab	ab	ab	bb	aa	aa	ab	ab	aa	aa	ab	ab	ab	ab	aa	ab	ab	aa	ab	aa	ab	ab	aa	ab	aa
A08	7.156	Block8413	aaxbb	aa	ab	aa	ab	bb	bb	ab	aa	aa	ab	aa	ab	ab	aa	ab	aa	aa	ab	ab	ab	aa	ab	ab	ab	bb	aa	aa	ab	aa	aa	aa	ab	ab	ab	ab	aa	ab	ab	aa	ab	aa	ab	ab	aa	aa	aa
A08	10.31	Block8410	aaxbb	aa	ab	aa	ab	bb	bb	ab	aa	aa	ab	aa	ab	ab	aa	ab	aa	aa	ab	ab	ab	aa	ab	ab	ab	bb	aa	aa	ab	aa	aa	aa	ab	ab	ab	ab	aa	aa	ab	aa	ab	aa	ab	ab	aa	aa	aa
A08	12.111	Block8415	aaxbb	aa	ab	aa	ab	bb	bb	ab	aa	aa	ab	aa	ab	ab	aa	ab	aa	aa	ab	ab	ab	aa	ab	ab	ab	bb	aa	aa	ab	aa	aa	aa	aa	ab	ab	ab	aa	aa	ab	aa	ab	aa	ab	ab	aa	aa	aa
A08	12.361	Block8414	aaxbb	aa	ab	aa	ab	bb	bb	ab	aa	aa	ab	aa	ab	ab	aa	ab	aa	aa	ab	ab	ab	aa	ab	ab	ab	bb	aa	aa	ab	aa	aa	aa	aa	ab	ab	ab	aa	aa	ab	aa	ab	aa	ab	ab	aa	aa	aa
A08	13.111	Block8412	aaxbb	aa	ab	aa	ab	bb	bb	aa	aa	aa	ab	aa	ab	aa	aa	ab	aa	aa	aa	ab	ab	aa	ab	ab	ab	bb	aa	aa	ab	aa	aa	aa	aa	ab	ab	ab	aa	aa	ab	aa	ab	aa	ab	ab	aa	aa	aa
A08	13.361	Block8418	aaxbb	aa	ab	aa	aa	bb	bb	aa	aa	aa	ab	aa	ab	aa	aa	ab	aa	aa	aa	ab	ab	aa	ab	ab	ab	bb	aa	aa	ab	aa	aa	aa	aa	ab	ab	ab	aa	aa	ab	aa	ab	aa	ab	ab	aa	aa	aa
A08	14.361	Block8419	aaxbb	aa	aa	aa	aa	bb	bb	aa	aa	aa	ab	aa	ab	aa	aa	ab	aa	aa	aa	ab	ab	aa	aa	ab	ab	bb	aa	aa	ab	aa	aa	aa	aa	ab	ab	ab	aa	aa	bb	aa	ab	aa	ab	ab	aa	aa	aa
A08	15.361	Block8420	aaxbb	aa	aa	aa	aa	bb	bb	aa	aa	aa	aa	aa	ab	aa	aa	aa	aa	aa	aa	ab	ab	aa	aa	aa	ab	bb	aa	aa	ab	aa	aa	aa	aa	ab	ab	ab	aa	aa	bb	aa	ab	aa	ab	ab	aa	aa	aa
A08	15.611	Block8421	aaxbb	aa	aa	aa	aa	bb	bb	aa	aa	aa	aa	aa	ab	aa	aa	aa	aa	aa	aa	ab	ab	aa	aa	aa	ab	bb	aa	aa	ab	aa	aa	aa	aa	ab	ab	ab	aa	aa	bb	aa	ab	ab	ab	ab	aa	aa	aa
A08	16.212	Block8422	aaxbb	aa	aa	aa	aa	bb	bb	aa	aa	bb	aa	aa	ab	aa	aa	aa	aa	aa	aa	ab	aa	aa	aa	aa	bb	bb	aa	aa	ab	aa	aa	aa	aa	ab	ab	ab	aa	aa	bb	aa	ab	ab	ab	ab	aa	aa	aa
A08	16.212	Block8411	aaxbb	aa	aa	aa	aa	bb	bb	aa	aa	bb	aa	aa	ab	aa	aa	aa	aa	aa	aa	ab	aa	aa	aa	aa	bb	bb	aa	aa	ab	aa	aa	aa	aa	ab	ab	ab	aa	aa	bb	aa	ab	ab	ab	ab	aa	aa	aa
A08	16.212	Block8416	aaxbb	aa	aa	aa	aa	bb	bb	aa	aa	bb	aa	aa	ab	aa	aa	aa	aa	aa	aa	ab	aa	aa	aa	aa	bb	bb	aa	aa	ab	aa	aa	aa	aa	ab	ab	ab	aa	aa	bb	aa	ab	ab	ab	ab	aa	aa	aa
A08	16.462	Block8423	aaxbb	aa	aa	aa	aa	bb	bb	aa	aa	bb	aa	aa	ab	aa	aa	aa	aa	aa	aa	ab	aa	aa	aa	aa	bb	bb	ab	aa	ab	aa	aa	aa	aa	ab	ab	ab	aa	aa	bb	aa	ab	ab	ab	ab	aa	aa	aa
A08	16.462	Block8417	aaxbb	aa	aa	aa	aa	bb	bb	aa	aa	bb	aa	aa	ab	aa	aa	aa	aa	aa	aa	ab	aa	aa	aa	aa	bb	bb	ab	aa	ab	aa	aa	aa	aa	ab	ab	ab	aa	aa	bb	aa	ab	ab	ab	ab	aa	aa	aa
A08	16.712	Block8424	aaxbb	aa	aa	aa	aa	bb	bb	aa	aa	bb	aa	aa	ab	aa	aa	aa	aa	aa	aa	ab	aa	aa	aa	aa	bb	bb	ab	aa	ab	aa	aa	aa	aa	ab	ab	ab	aa	aa	bb	aa	ab	ab	ab	ab	aa	aa	aa
A08	17.462	Block8425	aaxbb	aa	aa	aa	aa	bb	bb	aa	aa	bb	aa	aa	ab	aa	aa	aa	aa	aa	aa	ab	aa	aa	aa	aa	bb	bb	ab	aa	ab	aa	aa	aa	aa	ab	ab	ab	aa	aa	bb	aa	ab	ab	ab	ab	aa	aa	aa
A08	18.712	Block8426	aaxbb	aa	aa	aa	aa	bb	bb	aa	aa	bb	aa	aa	ab	aa	aa	aa	aa	aa	aa	ab	aa	aa	aa	aa	bb	bb	ab	aa	ab	aa	aa	aa	aa	ab	ab	ab	aa	aa	bb	aa	ab	ab	ab	ab	aa	aa	aa
A08	19.564	Block8428	aaxbb	aa	aa	aa	aa	bb	bb	aa	aa	bb	aa	aa	ab	aa	aa	aa	aa	aa	aa	ab	aa	aa	aa	aa	bb	bb	ab	aa	ab	aa	aa	aa	aa	ab	ab	ab	aa	ab	bb	ab	ab	ab	ab	ab	aa	aa	aa
A08	20.665	Block8431	aaxbb	aa	aa	aa	aa	bb	bb	aa	aa	bb	aa	aa	ab	aa	aa	aa	aa	aa	aa	ab	aa	aa	aa	aa	bb	bb	ab	aa	ab	aa	aa	ab	aa	ab	ab	ab	aa	ab	bb	ab	ab	ab	ab	ab	aa	aa	aa
A08	21.62	Block8432	aaxbb	aa	aa	aa	aa	bb	bb	aa	aa	bb	aa	ab	ab	aa	aa	aa	ab	aa	aa	ab	aa	aa	aa	aa	bb	bb	ab	aa	ab	aa	aa	ab	aa	ab	ab	ab	aa	ab	bb	ab	ab	ab	ab	ab	aa	bb	aa
A08	22.382	Block8433	aaxbb	aa	aa	aa	aa	bb	bb	aa	aa	bb	aa	ab	ab	aa	aa	aa	ab	aa	aa	ab	aa	aa	aa	aa	bb	bb	ab	aa	ab	aa	aa	ab	aa	ab	ab	ab	aa	ab	bb	ab	ab	ab	ab	ab	aa	bb	aa
A08	22.733	Block8435	aaxbb	aa	aa	aa	aa	bb	bb	aa	aa	bb	aa	ab	ab	aa	aa	aa	ab	ab	aa	ab	aa	aa	aa	aa	bb	bb	ab	aa	ab	aa	aa	ab	aa	ab	ab	ab	aa	ab	bb	ab	ab	ab	ab	ab	aa	bb	aa
A08	23.835	Block8437	aaxbb	aa	aa	aa	aa	bb	bb	aa	aa	bb	aa	ab	ab	aa	aa	aa	ab	ab	aa	ab	aa	aa	aa	aa	bb	bb	ab	aa	ab	aa	aa	ab	aa	ab	ab	ab	aa	ab	bb	ab	ab	ab	ab	ab	aa	bb	aa
A08	24.085	Block8434	aaxbb	aa	aa	aa	aa	bb	bb	aa	aa	bb	aa	ab	ab	aa	aa	aa	ab	ab	aa	ab	aa	aa	aa	aa	bb	bb	ab	aa	ab	aa	aa	ab	aa	ab	ab	ab	aa	ab	bb	ab	ab	ab	ab	ab	aa	bb	aa
A08	25.335	Block8436	aaxbb	aa	aa	aa	aa	bb	bb	aa	aa	bb	aa	ab	ab	aa	aa	aa	ab	ab	aa	ab	aa	aa	aa	aa	bb	bb	ab	aa	ab	aa	aa	ab	aa	ab	ab	ab	aa	ab	bb	ab	ab	ab	ab	ab	aa	bb	aa
A08	26.335	Block8439	aaxbb	aa	aa	aa	aa	bb	bb	aa	aa	bb	aa	ab	ab	aa	aa	aa	ab	ab	aa	ab	aa	aa	aa	aa	bb	bb	ab	aa	ab	aa	aa	ab	aa	ab	ab	ab	aa	ab	bb	ab	ab	ab	ab	ab	aa	bb	aa
A08	27.585	Block8440	aaxbb	aa	aa	aa	aa	bb	bb	aa	aa	bb	aa	ab	ab	aa	aa	aa	ab	ab	aa	ab	aa	aa	aa	aa	bb	bb	ab	aa	ab	aa	aa	ab	aa	ab	ab	ab	aa	ab	bb	ab	ab	ab	ab	ab	aa	bb	aa
A08	28.335	Block8443	aaxbb	aa	aa	aa	aa	bb	bb	aa	aa	bb	aa	ab	ab	aa	aa	aa	ab	ab	aa	ab	aa	aa	aa	aa	bb	bb	ab	aa	ab	aa	aa	ab	aa	ab	bb	ab	aa	ab	bb	ab	ab	ab	ab	ab	aa	bb	aa
A08	29.886	Block8444	aaxbb	aa	aa	aa	aa	bb	bb	aa	aa	bb	aa	ab	ab	aa	aa	aa	ab	ab	aa	ab	aa	aa	aa	aa	bb	bb	ab	aa	ab	aa	aa	ab	aa	ab	bb	ab	ab	ab	bb	ab	ab	ab	ab	ab	aa	bb	ab
A08	30.136	Block8441	aaxbb	aa	aa	aa	aa	bb	bb	aa	aa	bb	aa	ab	ab	aa	aa	aa	ab	ab	aa	ab	aa	aa	aa	aa	bb	bb	ab	aa	ab	aa	aa	ab	aa	ab	bb	ab	ab	ab	bb	ab	ab	ab	ab	ab	aa	bb	ab
A08	30.636	Block8442	aaxbb	aa	aa	aa	aa	bb	bb	aa	aa	bb	aa	ab	ab	aa	ab	aa	ab	ab	aa	ab	aa	aa	aa	aa	bb	bb	ab	aa	ab	aa	aa	ab	aa	ab	bb	ab	ab	ab	bb	ab	ab	ab	ab	ab	aa	bb	ab
A08	30.636	Block8445	aaxbb	aa	aa	aa	aa	bb	bb	aa	aa	bb	aa	ab	ab	aa	ab	aa	ab	ab	aa	ab	aa	aa	aa	aa	bb	bb	ab	aa	ab	aa	aa	ab	aa	ab	bb	ab	ab	ab	bb	ab	ab	ab	ab	ab	aa	bb	ab
A08	31.386	Block8447	aaxbb	aa	aa	ab	aa	bb	bb	aa	aa	bb	aa	ab	ab	aa	ab	aa	ab	ab	aa	ab	aa	aa	aa	aa	bb	bb	ab	aa	ab	aa	aa	ab	aa	ab	bb	ab	ab	ab	bb	ab	ab	ab	ab	ab	aa	bb	ab
A08	31.386	Block8438	aaxbb	aa	aa	ab	aa	bb	bb	aa	aa	bb	aa	ab	ab	aa	ab	aa	ab	ab	aa	ab	aa	aa	aa	aa	bb	bb	ab	aa	ab	aa	aa	ab	aa	ab	bb	ab	ab	ab	bb	ab	ab	ab	ab	ab	aa	bb	ab
A08	31.886	Block8448	aaxbb	aa	aa	ab	aa	bb	bb	aa	aa	bb	aa	ab	ab	aa	ab	aa	ab	ab	aa	ab	aa	aa	aa	aa	bb	bb	ab	aa	ab	aa	aa	ab	aa	ab	bb	ab	ab	ab	bb	ab	ab	ab	ab	ab	aa	bb	ab
A08	31.886	Block8446	aaxbb	aa	aa	ab	aa	bb	bb	aa	aa	bb	aa	ab	ab	aa	ab	aa	ab	ab	aa	ab	aa	aa	aa	aa	bb	bb	ab	aa	ab	aa	aa	ab	aa	ab	bb	ab	ab	ab	bb	ab	ab	ab	ab	ab	aa	bb	ab
A08	32.386	Block8449	aaxbb	aa	aa	ab	aa	bb	bb	aa	aa	bb	aa	ab	ab	aa	ab	aa	ab	ab	aa	ab	aa	aa	aa	aa	bb	bb	ab	aa	ab	aa	aa	ab	aa	ab	bb	ab	ab	ab	bb	ab	ab	ab	ab	ab	aa	bb	ab
A08	33.136	Block8450	aaxbb	aa	aa	ab	aa	bb	bb	aa	aa	bb	aa	ab	ab	aa	ab	aa	ab	ab	aa	ab	aa	aa	aa	aa	bb	bb	ab	aa	ab	aa	aa	ab	aa	ab	bb	ab	ab	ab	bb	ab	ab	ab	ab	ab	aa	bb	ab
A08	34.136	Block8451	aaxbb	aa	aa	ab	aa	bb	bb	aa	aa	bb	aa	ab	ab	aa	ab	aa	ab	ab	aa	ab	aa	aa	aa	aa	bb	bb	ab	aa	ab	aa	aa	ab	aa	ab	bb	ab	ab	ab	bb	ab	ab	ab	ab	ab	aa	bb	ab
A08	34.386	Block8452	aaxbb	aa	aa	ab	aa	bb	bb	aa	aa	bb	aa	ab	ab	aa	ab	aa	ab	ab	aa	ab	aa	aa	aa	aa	bb	bb	ab	aa	ab	aa	aa	ab	aa	ab	bb	ab	ab	ab	bb	ab	ab	ab	ab	ab	aa	bb	ab
A08	35.386	Block8453	aaxbb	aa	ab	ab	aa	bb	bb	aa	aa	bb	aa	ab	ab	aa	ab	aa	ab	ab	aa	ab	aa	aa	aa	aa	bb	bb	ab	aa	ab	aa	aa	ab	aa	ab	bb	ab	ab	ab	bb	ab	ab	ab	ab	ab	aa	bb	ab
A08	38.54	Block8454	aaxbb	aa	ab	ab	ab	bb	bb	ab	aa	bb	aa	ab	ab	ab	ab	ab	ab	ab	aa	ab	aa	aa	ab	aa	bb	bb	ab	aa	ab	aa	aa	ab	aa	ab	bb	ab	ab	ab	bb	ab	ab	ab	ab	ab	aa	bb	ab
A08	39.29	Block8455	aaxbb	aa	ab	ab	ab	bb	bb	ab	ab	bb	aa	ab	ab	ab	ab	ab	ab	ab	aa	ab	aa	aa	ab	aa	bb	bb	ab	ab	ab	aa	aa	ab	aa	ab	bb	ab	ab	ab	bb	ab	ab	ab	ab	ab	aa	bb	ab
A08	39.791	Block8456	aaxbb	ab	ab	ab	ab	bb	bb	ab	ab	bb	aa	ab	ab	ab	ab	ab	ab	ab	aa	ab	aa	aa	ab	aa	bb	bb	ab	ab	ab	aa	aa	ab	aa	ab	bb	ab	ab	ab	bb	ab	ab	ab	ab	ab	aa	bb	ab
A08	40.041	Block8457	aaxbb	ab	ab	ab	ab	bb	bb	ab	ab	bb	aa	ab	ab	ab	ab	ab	ab	ab	aa	ab	aa	aa	ab	aa	bb	bb	ab	ab	ab	aa	aa	ab	aa	ab	bb	ab	ab	ab	bb	ab	ab	ab	ab	ab	aa	bb	ab
A08	41.591	Block8458	aaxbb	ab	ab	ab	ab	bb	bb	ab	ab	bb	aa	ab	ab	ab	ab	ab	ab	ab	aa	ab	aa	aa	ab	aa	bb	bb	ab	ab	ab	aa	aa	ab	aa	ab	bb	ab	ab	ab	bb	ab	ab	ab	ab	ab	aa	bb	ab
A08	43.692	Block8459	aaxbb	ab	ab	ab	ab	bb	bb	ab	ab	bb	ab	ab	ab	ab	ab	ab	ab	ab	ab	ab	aa	aa	ab	aa	bb	bb	ab	ab	ab	aa	ab	ab	aa	ab	bb	ab	ab	ab	bb	ab	ab	ab	ab	ab	ab	bb	ab
A08	43.942	Block8460	aaxbb	ab	ab	ab	ab	bb	bb	ab	ab	bb	ab	ab	ab	ab	ab	ab	ab	ab	ab	ab	aa	aa	ab	aa	bb	bb	ab	ab	ab	aa	ab	ab	aa	ab	bb	ab	ab	ab	bb	ab	ab	ab	ab	ab	ab	bb	ab
A08	44.742	Block8462	aaxbb	ab	ab	ab	ab	bb	bb	ab	ab	bb	ab	ab	ab	ab	ab	ab	ab	ab	ab	ab	aa	aa	ab	aa	bb	bb	ab	ab	ab	ab	ab	ab	aa	ab	bb	ab	ab	ab	bb	ab	ab	ab	ab	ab	ab	bb	ab
A08	45.242	Block8461	aaxbb	ab	ab	ab	ab	bb	bb	ab	ab	bb	ab	ab	ab	ab	ab	ab	ab	ab	ab	ab	aa	aa	ab	aa	bb	bb	ab	ab	ab	ab	ab	ab	aa	ab	bb	ab	ab	ab	bb	ab	ab	ab	ab	ab	ab	bb	ab
A08	45.492	Block8463	aaxbb	ab	ab	ab	ab	bb	bb	ab	ab	bb	ab	ab	ab	ab	ab	ab	ab	ab	ab	ab	aa	aa	ab	aa	bb	bb	ab	ab	ab	ab	ab	ab	aa	ab	bb	ab	ab	ab	bb	ab	ab	ab	ab	ab	ab	bb	ab
A08	46.542	Block8465	aaxbb	ab	ab	ab	ab	bb	bb	ab	ab	bb	ab	ab	ab	ab	ab	ab	ab	ab	ab	ab	aa	ab	ab	aa	bb	bb	ab	ab	ab	ab	ab	ab	aa	ab	bb	ab	ab	ab	bb	ab	ab	ab	ab	ab	ab	bb	ab
A08	47.093	Block8464	aaxbb	ab	ab	ab	ab	bb	bb	ab	ab	bb	ab	ab	ab	ab	ab	ab	ab	ab	ab	ab	aa	ab	ab	aa	bb	bb	ab	ab	ab	ab	ab	ab	aa	ab	bb	ab	ab	ab	bb	ab	ab	ab	ab	ab	ab	ab	ab
A08	47.643	Block8466	aaxbb	ab	ab	ab	ab	bb	bb	ab	ab	bb	ab	ab	ab	ab	ab	ab	ab	ab	ab	ab	aa	ab	ab	aa	bb	bb	ab	ab	ab	ab	ab	ab	aa	ab	bb	ab	ab	ab	bb	ab	ab	ab	ab	ab	ab	ab	ab
A08	48.443	Block8467	aaxbb	ab	ab	ab	ab	bb	bb	ab	ab	bb	ab	ab	ab	ab	ab	ab	ab	ab	ab	ab	aa	ab	ab	aa	bb	bb	ab	ab	ab	ab	ab	ab	aa	ab	bb	ab	ab	ab	bb	ab	ab	ab	ab	ab	ab	ab	ab
A08	48.693	Block8469	aaxbb	ab	ab	ab	ab	bb	bb	ab	ab	bb	ab	ab	ab	ab	ab	ab	ab	ab	ab	ab	aa	ab	ab	aa	bb	bb	ab	ab	ab	ab	ab	ab	aa	ab	bb	ab	ab	ab	bb	ab	ab	ab	ab	ab	ab	ab	ab
A08	48.943	Block8470	aaxbb	ab	ab	ab	ab	bb	bb	ab	ab	bb	ab	ab	ab	ab	ab	ab	ab	ab	ab	ab	aa	ab	ab	aa	bb	bb	ab	ab	ab	ab	ab	ab	ab	ab	bb	ab	ab	ab	bb	ab	ab	ab	ab	ab	ab	ab	ab
A08	49.193	Block8471	aaxbb	ab	ab	ab	ab	bb	bb	ab	ab	ab	ab	ab	ab	ab	ab	ab	ab	ab	ab	ab	aa	ab	ab	aa	bb	bb	ab	ab	ab	ab	ab	ab	ab	ab	bb	ab	ab	ab	bb	ab	ab	ab	ab	ab	ab	ab	ab
A08	49.993	Block8472	aaxbb	ab	ab	ab	ab	bb	bb	ab	ab	ab	ab	ab	ab	ab	ab	ab	ab	ab	ab	ab	aa	ab	ab	aa	bb	bb	ab	ab	ab	ab	ab	ab	ab	ab	bb	ab	ab	ab	bb	ab	ab	ab	ab	ab	ab	ab	ab
A08	50.243	Block8474	aaxbb	ab	ab	ab	ab	bb	bb	ab	ab	ab	ab	ab	ab	ab	ab	ab	ab	ab	ab	ab	aa	ab	ab	aa	bb	bb	ab	ab	ab	ab	ab	ab	ab	ab	bb	ab	ab	ab	bb	ab	ab	ab	ab	ab	ab	ab	ab
A08	50.793	Block8473	aaxbb	ab	ab	ab	ab	bb	bb	ab	aa	ab	ab	ab	ab	ab	ab	ab	ab	ab	ab	ab	aa	ab	ab	aa	bb	bb	ab	ab	ab	ab	ab	ab	ab	ab	bb	ab	ab	ab	bb	ab	ab	ab	ab	ab	ab	ab	ab
A08	51.043	Block8476	aaxbb	ab	ab	ab	ab	bb	bb	ab	aa	ab	ab	ab	ab	ab	ab	ab	ab	ab	ab	ab	aa	ab	ab	aa	bb	bb	ab	ab	ab	ab	ab	ab	ab	ab	bb	ab	ab	ab	bb	ab	ab	ab	ab	ab	ab	ab	ab
A08	51.293	Block8477	aaxbb	ab	ab	ab	ab	bb	bb	ab	aa	ab	ab	ab	ab	ab	ab	ab	ab	ab	ab	ab	aa	ab	ab	aa	bb	bb	ab	ab	ab	ab	ab	ab	ab	ab	bb	ab	ab	ab	bb	ab	ab	ab	ab	ab	ab	ab	ab
A08	51.843	Block8478	aaxbb	ab	ab	ab	ab	bb	bb	ab	aa	ab	ab	ab	ab	ab	ab	ab	ab	ab	ab	ab	aa	ab	ab	aa	bb	bb	ab	ab	ab	ab	aa	ab	ab	ab	bb	ab	ab	ab	bb	ab	ab	ab	ab	ab	ab	ab	ab
A08	53.193	Block8479	aaxbb	ab	ab	ab	ab	bb	bb	ab	aa	ab	ab	ab	ab	ab	ab	ab	ab	ab	ab	ab	aa	ab	ab	aa	bb	bb	ab	ab	ab	ab	aa	ab	ab	ab	ab	ab	ab	ab	bb	ab	ab	ab	ab	ab	ab	ab	ab
A08	53.993	Block8480	aaxbb	ab	ab	ab	ab	bb	bb	ab	aa	ab	ab	ab	ab	ab	ab	ab	ab	ab	ab	ab	aa	ab	ab	aa	bb	bb	ab	ab	ab	ab	aa	ab	ab	ab	ab	ab	ab	ab	ab	ab	ab	ab	ab	ab	ab	ab	ab
A08	55.093	Block8481	aaxbb	ab	ab	ab	ab	bb	bb	ab	aa	ab	ab	ab	ab	ab	ab	ab	ab	ab	ab	ab	aa	ab	ab	aa	bb	bb	ab	ab	ab	ab	aa	ab	ab	ab	ab	ab	ab	ab	ab	ab	ab	ab	ab	ab	ab	ab	ab
A08	55.093	Block8475	aaxbb	ab	ab	ab	ab	bb	bb	ab	aa	ab	ab	ab	ab	ab	ab	ab	ab	ab	ab	ab	aa	ab	ab	aa	bb	bb	ab	ab	ab	ab	aa	ab	ab	ab	ab	ab	ab	ab	ab	ab	ab	ab	ab	ab	ab	ab	ab
A08	55.343	Block8482	aaxbb	ab	ab	ab	ab	bb	bb	ab	aa	ab	ab	ab	ab	ab	ab	ab	ab	ab	ab	ab	aa	ab	ab	aa	bb	bb	ab	ab	ab	ab	aa	ab	ab	ab	ab	ab	ab	ab	ab	ab	ab	ab	ab	ab	ab	ab	ab
A08	56.143	Block8483	aaxbb	ab	ab	ab	ab	bb	bb	ab	aa	ab	ab	ab	ab	ab	ab	ab	ab	ab	ab	ab	ab	ab	ab	aa	bb	bb	ab	ab	ab	ab	aa	ab	ab	ab	ab	ab	ab	ab	ab	ab	ab	ab	ab	ab	ab	ab	ab
A08	56.693	Block8484	aaxbb	ab	ab	ab	ab	bb	bb	ab	aa	ab	ab	ab	ab	ab	ab	ab	ab	ab	ab	ab	ab	ab	ab	aa	ab	bb	ab	ab	ab	ab	aa	ab	ab	ab	ab	ab	ab	ab	ab	ab	ab	ab	ab	ab	ab	ab	ab
A08	57.243	Block8531	aaxbb	ab	ab	ab	ab	bb	bb	ab	aa	ab	ab	ab	ab	ab	ab	ab	ab	ab	ab	ab	ab	ab	ab	aa	ab	bb	ab	ab	ab	ab	aa	ab	ab	ab	ab	ab	ab	ab	ab	ab	ab	ab	ab	ab	aa	ab	ab
A08	57.493	Block8490	aaxbb	ab	ab	ab	ab	bb	bb	ab	aa	ab	ab	ab	ab	ab	ab	ab	ab	ab	ab	ab	ab	ab	ab	aa	ab	bb	ab	ab	ab	ab	aa	ab	ab	ab	ab	ab	ab	ab	ab	ab	ab	ab	ab	ab	aa	ab	ab
A08	58.293	Block8493	aaxbb	ab	ab	ab	ab	bb	bb	ab	aa	ab	ab	ab	ab	ab	ab	ab	ab	ab	ab	ab	ab	ab	ab	aa	ab	bb	ab	aa	ab	ab	aa	ab	ab	ab	ab	ab	ab	ab	ab	aa	ab	ab	ab	ab	aa	ab	ab
A08	58.543	Block8492	aaxbb	ab	ab	ab	ab	bb	bb	ab	aa	ab	ab	ab	ab	ab	ab	ab	ab	ab	ab	ab	ab	ab	ab	aa	ab	bb	ab	aa	ab	ab	aa	ab	ab	ab	ab	ab	ab	ab	ab	aa	ab	ab	ab	ab	aa	ab	ab
A08	58.793	Block8534	aaxbb	ab	ab	ab	ab	bb	bb	ab	aa	ab	ab	ab	ab	ab	ab	ab	ab	ab	ab	ab	ab	ab	ab	aa	ab	bb	ab	aa	ab	ab	aa	ab	ab	ab	ab	ab	ab	ab	ab	aa	ab	ab	ab	ab	aa	ab	ab
A08	59.043	Block8491	aaxbb	ab	ab	ab	ab	bb	bb	ab	aa	ab	ab	ab	ab	ab	ab	ab	ab	ab	ab	ab	ab	ab	ab	ab	ab	bb	ab	aa	ab	ab	aa	ab	ab	ab	ab	ab	ab	ab	ab	aa	ab	ab	ab	ab	aa	ab	ab
A08	59.594	Block8528	aaxbb	ab	ab	ab	ab	ab	bb	ab	aa	ab	ab	ab	ab	ab	ab	ab	ab	ab	ab	ab	ab	ab	ab	ab	ab	ab	ab	aa	ab	ab	aa	ab	ab	ab	ab	ab	ab	ab	ab	aa	ab	ab	ab	ab	aa	ab	ab
A08	60.144	Block8532	aaxbb	ab	ab	ab	ab	ab	bb	ab	aa	ab	ab	ab	ab	aa	ab	ab	ab	ab	ab	ab	ab	ab	ab	ab	ab	ab	ab	aa	ab	ab	aa	ab	ab	ab	ab	ab	ab	ab	ab	aa	ab	ab	ab	ab	aa	ab	ab
A08	61.244	Block8529	aaxbb	ab	ab	ab	ab	ab	bb	ab	aa	ab	ab	ab	ab	aa	ab	ab	ab	ab	ab	ab	ab	aa	ab	ab	ab	ab	ab	aa	ab	ab	aa	ab	ab	ab	ab	ab	ab	ab	ab	aa	ab	ab	ab	ab	aa	ab	ab
A08	63.996	Block8536	aaxbb	ab	ab	ab	ab	ab	bb	ab	aa	ab	ab	ab	ab	aa	ab	ab	ab	ab	ab	ab	ab	aa	ab	ab	ab	ab	ab	aa	ab	ab	aa	ab	ab	ab	aa	ab	ab	ab	ab	aa	ab	ab	ab	ab	aa	ab	ab
A08	66.448	Block8535	aaxbb	ab	ab	ab	ab	ab	bb	ab	aa	ab	ab	ab	ab	aa	ab	ab	ab	ab	ab	ab	ab	aa	ab	ab	ab	ab	ab	aa	ab	ab	aa	ab	ab	ab	aa	ab	ab	ab	ab	aa	ab	ab	aa	ab	aa	ab	ab
A08	70.507	Block8533	aaxbb	ab	ab	ab	ab	ab	bb	ab	aa	ab	ab	ab	ab	aa	ab	ab	ab	ab	ab	ab	ab	aa	ab	ab	ab	ab	ab	aa	ab	ab	aa	ab	ab	ab	aa	ab	aa	ab	ab	aa	ab	ab	aa	ab	aa	ab	aa
A08	72.609	Block8556	aaxbb	ab	ab	ab	ab	ab	bb	ab	aa	ab	ab	ab	ab	aa	ab	ab	ab	ab	ab	ab	ab	aa	ab	ab	ab	ab	ab	aa	ab	ab	aa	ab	ab	ab	aa	ab	aa	ab	ab	aa	ab	ab	aa	ab	aa	ab	aa
A08	77.423	Block8553	aaxbb	ab	ab	ab	ab	ab	bb	ab	aa	ab	ab	ab	ab	aa	ab	ab	ab	ab	ab	ab	ab	aa	ab	ab	ab	ab	ab	aa	ab	ab	aa	ab	ab	ab	aa	ab	aa	ab	ab	aa	ab	ab	aa	ab	aa	aa	aa
A08	83.808	Block8558	aaxbb	ab	ab	ab	ab	ab	bb	ab	aa	ab	ab	ab	ab	aa	ab	ab	ab	ab	ab	ab	ab	aa	ab	ab	ab	ab	ab	aa	aa	ab	aa	aa	ab	ab	aa	ab	aa	ab	ab	aa	aa	aa	aa	aa	aa	aa	aa
A08	86.862	Block8537	aaxbb	ab	ab	ab	ab	ab	bb	ab	aa	ab	aa	ab	ab	aa	ab	ab	bb	ab	ab	ab	ab	aa	ab	ab	ab	ab	ab	aa	aa	ab	aa	aa	aa	ab	aa	ab	aa	ab	aa	aa	aa	aa	aa	aa	aa	aa	aa
A08	87.362	Block8582	aaxbb	ab	aa	ab	ab	ab	bb	ab	aa	ab	aa	ab	ab	aa	ab	ab	bb	ab	ab	bb	ab	aa	ab	ab	ab	ab	ab	aa	aa	ab	aa	aa	aa	ab	aa	ab	aa	ab	aa	aa	aa	aa	aa	aa	aa	aa	aa
A08	87.612	Block8559	aaxbb	ab	aa	ab	ab	ab	bb	ab	aa	ab	aa	ab	bb	aa	ab	ab	bb	ab	ab	bb	ab	aa	ab	ab	ab	ab	ab	aa	aa	ab	aa	aa	aa	ab	aa	ab	aa	ab	aa	aa	aa	aa	aa	aa	aa	aa	aa
A08	87.612	Block8555	aaxbb	ab	aa	ab	ab	ab	bb	ab	aa	ab	aa	ab	bb	aa	ab	ab	bb	ab	ab	bb	ab	aa	ab	ab	ab	ab	ab	aa	aa	ab	aa	aa	aa	ab	aa	ab	aa	ab	aa	aa	aa	aa	aa	aa	aa	aa	aa
A08	87.612	Block8554	aaxbb	ab	aa	ab	ab	ab	bb	ab	aa	ab	aa	ab	bb	aa	ab	ab	bb	ab	ab	bb	ab	aa	ab	ab	ab	ab	ab	aa	aa	ab	aa	aa	aa	ab	aa	ab	aa	ab	aa	aa	aa	aa	aa	aa	aa	aa	aa
A08	87.612	Block8557	aaxbb	ab	aa	ab	ab	ab	bb	ab	aa	ab	aa	ab	bb	aa	ab	ab	bb	ab	ab	bb	ab	aa	ab	ab	ab	ab	ab	aa	aa	ab	aa	aa	aa	ab	aa	ab	aa	ab	aa	aa	aa	aa	aa	aa	aa	aa	aa
A08	87.612	Block8530	aaxbb	ab	aa	ab	ab	ab	bb	ab	aa	ab	aa	ab	bb	aa	ab	ab	bb	ab	ab	bb	ab	aa	ab	ab	ab	ab	ab	aa	aa	ab	aa	aa	aa	ab	aa	ab	aa	ab	aa	aa	aa	aa	aa	aa	aa	aa	aa
A08	87.612	Block8589	aaxbb	ab	aa	ab	ab	ab	bb	ab	aa	ab	aa	ab	bb	aa	ab	ab	bb	ab	ab	bb	ab	aa	ab	ab	ab	ab	ab	aa	aa	ab	aa	aa	aa	ab	aa	ab	aa	ab	aa	aa	aa	aa	aa	aa	aa	aa	aa
A08	87.862	Block8576	aaxbb	ab	aa	ab	ab	ab	bb	ab	aa	ab	aa	ab	bb	aa	ab	ab	bb	ab	ab	bb	ab	aa	ab	ab	ab	ab	ab	aa	aa	ab	aa	aa	aa	ab	aa	ab	aa	ab	aa	aa	aa	aa	aa	aa	aa	aa	aa
A08	87.862	Block8564	aaxbb	ab	aa	ab	ab	ab	bb	ab	aa	ab	aa	ab	bb	aa	ab	ab	bb	ab	ab	bb	ab	aa	ab	ab	ab	ab	ab	aa	aa	ab	aa	aa	aa	ab	aa	ab	aa	ab	aa	aa	aa	aa	aa	aa	aa	aa	aa
A08	88.112	Block8586	aaxbb	ab	aa	ab	ab	ab	bb	ab	aa	ab	aa	ab	bb	aa	ab	ab	bb	ab	ab	bb	ab	aa	ab	ab	ab	ab	ab	aa	aa	ab	aa	aa	aa	ab	aa	ab	aa	ab	aa	aa	aa	aa	aa	aa	aa	aa	aa
A08	88.362	Block8560	aaxbb	ab	aa	ab	ab	ab	bb	ab	aa	ab	aa	ab	bb	aa	ab	ab	bb	ab	ab	bb	ab	aa	ab	ab	ab	ab	ab	aa	aa	ab	aa	aa	aa	ab	aa	ab	aa	ab	aa	aa	aa	aa	aa	aa	aa	aa	aa
A08	88.362	Block8561	aaxbb	ab	aa	ab	ab	ab	bb	ab	aa	ab	aa	ab	bb	aa	ab	ab	bb	ab	ab	bb	ab	aa	ab	ab	ab	ab	ab	aa	aa	ab	aa	aa	aa	ab	aa	ab	aa	ab	aa	aa	aa	aa	aa	aa	aa	aa	aa
A08	88.612	Block8552	aaxbb	ab	aa	ab	ab	ab	bb	ab	aa	ab	aa	ab	bb	aa	ab	ab	bb	ab	ab	bb	ab	aa	ab	ab	ab	ab	ab	aa	aa	ab	aa	aa	aa	ab	aa	ab	aa	ab	aa	aa	aa	aa	aa	aa	aa	aa	aa
A08	88.612	Block8578	aaxbb	ab	aa	ab	ab	ab	bb	ab	aa	ab	aa	ab	bb	aa	ab	ab	bb	ab	ab	bb	ab	aa	ab	ab	ab	ab	ab	aa	aa	ab	aa	aa	aa	ab	aa	ab	aa	ab	aa	aa	aa	aa	aa	aa	aa	aa	aa
A08	88.612	Block8571	aaxbb	ab	aa	ab	ab	ab	bb	ab	aa	ab	aa	ab	bb	aa	ab	ab	bb	ab	ab	bb	ab	aa	ab	ab	ab	ab	ab	aa	aa	ab	aa	aa	aa	ab	aa	ab	aa	ab	aa	aa	aa	aa	aa	aa	aa	aa	aa
A08	88.612	Block8563	aaxbb	ab	aa	ab	ab	ab	bb	ab	aa	ab	aa	ab	bb	aa	ab	ab	bb	ab	ab	bb	ab	aa	ab	ab	ab	ab	ab	aa	aa	ab	aa	aa	aa	ab	aa	ab	aa	ab	aa	aa	aa	aa	aa	aa	aa	aa	aa
A08	102.23	Block8595	aaxbb	ab	ab	ab	ab	bb	bb	ab	bb	ab	bb	bb	bb	bb	ab	bb	bb	ab	ab	bb	ab	bb	ab	ab	ab	ab	ab	bb	aa	ab	bb	bb	aa	ab	aa	ab	bb	ab	aa	bb	bb	bb	aa	aa	bb	aa	aa
A08	102.98	Block8596	aaxbb	ab	ab	bb	bb	bb	bb	ab	bb	ab	bb	bb	bb	bb	ab	bb	bb	ab	ab	bb	ab	bb	ab	bb	ab	ab	ab	bb	aa	ab	bb	bb	aa	ab	aa	ab	bb	ab	aa	bb	bb	bb	aa	aa	bb	aa	aa
A08	102.98	Block8568	aaxbb	ab	ab	bb	bb	bb	bb	ab	bb	ab	bb	bb	bb	bb	ab	bb	bb	ab	ab	bb	ab	bb	ab	bb	ab	ab	ab	bb	aa	ab	bb	bb	aa	ab	aa	ab	bb	ab	aa	bb	bb	bb	aa	aa	bb	aa	aa
A08	105.231	Block8601	aaxbb	ab	ab	bb	bb	bb	bb	bb	bb	bb	bb	bb	bb	bb	bb	bb	bb	bb	bb	bb	ab	bb	ab	bb	bb	ab	bb	bb	aa	ab	bb	bb	aa	ab	aa	ab	bb	ab	aa	bb	bb	bb	aa	aa	bb	aa	aa
A08	105.982	Block8602	aaxbb	ab	ab	bb	bb	bb	bb	bb	bb	bb	bb	bb	bb	bb	bb	bb	bb	bb	bb	bb	bb	bb	bb	bb	bb	bb	bb	bb	aa	ab	bb	bb	aa	ab	aa	ab	bb	ab	aa	bb	bb	bb	aa	aa	bb	aa	aa
A08	106.732	Block8613	aaxbb	bb	ab	bb	bb	bb	bb	bb	bb	bb	bb	bb	bb	bb	bb	bb	bb	bb	bb	bb	bb	bb	bb	bb	bb	bb	bb	bb	aa	ab	bb	bb	aa	ab	aa	ab	bb	ab	aa	bb	bb	bb	aa	aa	bb	aa	aa
A08	106.732	Block8590	aaxbb	bb	ab	bb	bb	bb	bb	bb	bb	bb	bb	bb	bb	bb	bb	bb	bb	bb	bb	bb	bb	bb	bb	bb	bb	bb	bb	bb	aa	ab	bb	bb	aa	ab	aa	ab	bb	ab	aa	bb	bb	bb	aa	aa	bb	aa	aa
A08	106.982	Block8611	aaxbb	bb	ab	bb	bb	bb	bb	bb	bb	bb	bb	bb	bb	bb	bb	bb	bb	bb	bb	bb	bb	bb	bb	bb	bb	bb	bb	bb	aa	ab	bb	bb	aa	ab	aa	ab	bb	ab	aa	bb	bb	bb	aa	aa	bb	aa	aa
A08	106.982	Block8551	aaxbb	bb	ab	bb	bb	bb	bb	bb	bb	bb	bb	bb	bb	bb	bb	bb	bb	bb	bb	bb	bb	bb	bb	bb	bb	bb	bb	bb	aa	ab	bb	bb	aa	ab	aa	ab	bb	ab	aa	bb	bb	bb	aa	aa	bb	aa	aa
A08	106.982	Block8570	aaxbb	bb	ab	bb	bb	bb	bb	bb	bb	bb	bb	bb	bb	bb	bb	bb	bb	bb	bb	bb	bb	bb	bb	bb	bb	bb	bb	bb	aa	ab	bb	bb	aa	ab	aa	ab	bb	ab	aa	bb	bb	bb	aa	aa	bb	aa	aa
A08	106.982	Block8562	aaxbb	bb	ab	bb	bb	bb	bb	bb	bb	bb	bb	bb	bb	bb	bb	bb	bb	bb	bb	bb	bb	bb	bb	bb	bb	bb	bb	bb	aa	ab	bb	bb	aa	ab	aa	ab	bb	ab	aa	bb	bb	bb	aa	aa	bb	aa	aa
A08	106.982	Block8616	aaxbb	bb	ab	bb	bb	bb	bb	bb	bb	bb	bb	bb	bb	bb	bb	bb	bb	bb	bb	bb	bb	bb	bb	bb	bb	bb	bb	bb	aa	ab	bb	bb	aa	ab	aa	ab	bb	ab	aa	bb	bb	bb	aa	aa	bb	aa	aa
A08	107.232	Block8623	aaxbb	bb	ab	bb	bb	bb	bb	bb	bb	bb	bb	bb	bb	bb	bb	bb	bb	bb	bb	bb	bb	bb	bb	bb	bb	bb	bb	bb	aa	ab	bb	bb	aa	ab	aa	ab	bb	ab	aa	bb	bb	bb	aa	aa	bb	aa	aa
A08	107.232	Block8565	aaxbb	bb	ab	bb	bb	bb	bb	bb	bb	bb	bb	bb	bb	bb	bb	bb	bb	bb	bb	bb	bb	bb	bb	bb	bb	bb	bb	bb	aa	ab	bb	bb	aa	ab	aa	ab	bb	ab	aa	bb	bb	bb	aa	aa	bb	aa	aa
A08	107.232	Block8566	aaxbb	bb	ab	bb	bb	bb	bb	bb	bb	bb	bb	bb	bb	bb	bb	bb	bb	bb	bb	bb	bb	bb	bb	bb	bb	bb	bb	bb	aa	ab	bb	bb	aa	ab	aa	ab	bb	ab	aa	bb	bb	bb	aa	aa	bb	aa	aa
A08	107.232	Block8567	aaxbb	bb	ab	bb	bb	bb	bb	bb	bb	bb	bb	bb	bb	bb	bb	bb	bb	bb	bb	bb	bb	bb	bb	bb	bb	bb	bb	bb	aa	ab	bb	bb	aa	ab	aa	ab	bb	ab	aa	bb	bb	bb	aa	aa	bb	aa	aa
A08	107.232	Block8569	aaxbb	bb	ab	bb	bb	bb	bb	bb	bb	bb	bb	bb	bb	bb	bb	bb	bb	bb	bb	bb	bb	bb	bb	bb	bb	bb	bb	bb	aa	ab	bb	bb	aa	ab	aa	ab	bb	ab	aa	bb	bb	bb	aa	aa	bb	aa	aa
A08	107.232	Block8592	aaxbb	bb	ab	bb	bb	bb	bb	bb	bb	bb	bb	bb	bb	bb	bb	bb	bb	bb	bb	bb	bb	bb	bb	bb	bb	bb	bb	bb	aa	ab	bb	bb	aa	ab	aa	ab	bb	ab	aa	bb	bb	bb	aa	aa	bb	aa	aa
A08	107.482	Block8622	aaxbb	bb	ab	bb	bb	bb	bb	bb	bb	bb	bb	bb	bb	bb	bb	bb	bb	bb	bb	bb	bb	bb	bb	bb	bb	bb	bb	bb	aa	ab	bb	bb	aa	ab	aa	ab	bb	ab	aa	bb	bb	bb	aa	aa	bb	aa	aa
A08	107.482	Block8624	aaxbb	bb	ab	bb	bb	bb	bb	bb	bb	bb	bb	bb	bb	bb	bb	bb	bb	bb	bb	bb	bb	bb	bb	bb	bb	bb	bb	bb	aa	ab	bb	bb	aa	ab	aa	ab	bb	ab	aa	bb	bb	bb	aa	aa	bb	aa	aa
A08	107.732	Block8632	aaxbb	bb	ab	bb	bb	bb	bb	bb	bb	bb	bb	bb	bb	bb	bb	bb	bb	bb	bb	bb	bb	bb	bb	bb	bb	bb	bb	bb	aa	ab	bb	bb	aa	ab	aa	ab	bb	ab	aa	bb	bb	bb	aa	aa	bb	aa	aa
A08	107.732	Block8575	aaxbb	bb	ab	bb	bb	bb	bb	bb	bb	bb	bb	bb	bb	bb	bb	bb	bb	bb	bb	bb	bb	bb	bb	bb	bb	bb	bb	bb	aa	ab	bb	bb	aa	ab	aa	ab	bb	ab	aa	bb	bb	bb	aa	aa	bb	aa	aa
A08	107.732	Block8581	aaxbb	bb	ab	bb	bb	bb	bb	bb	bb	bb	bb	bb	bb	bb	bb	bb	bb	bb	bb	bb	bb	bb	bb	bb	bb	bb	bb	bb	aa	ab	bb	bb	aa	ab	aa	ab	bb	ab	aa	bb	bb	bb	aa	aa	bb	aa	aa
A08	107.732	Block8580	aaxbb	bb	ab	bb	bb	bb	bb	bb	bb	bb	bb	bb	bb	bb	bb	bb	bb	bb	bb	bb	bb	bb	bb	bb	bb	bb	bb	bb	aa	ab	bb	bb	aa	ab	aa	ab	bb	ab	aa	bb	bb	bb	aa	aa	bb	aa	aa
A08	107.732	Block8573	aaxbb	bb	ab	bb	bb	bb	bb	bb	bb	bb	bb	bb	bb	bb	bb	bb	bb	bb	bb	bb	bb	bb	bb	bb	bb	bb	bb	bb	aa	ab	bb	bb	aa	ab	aa	ab	bb	ab	aa	bb	bb	bb	aa	aa	bb	aa	aa
A08	107.732	Block8577	aaxbb	bb	ab	bb	bb	bb	bb	bb	bb	bb	bb	bb	bb	bb	bb	bb	bb	bb	bb	bb	bb	bb	bb	bb	bb	bb	bb	bb	aa	ab	bb	bb	aa	ab	aa	ab	bb	ab	aa	bb	bb	bb	aa	aa	bb	aa	aa
A08	107.732	Block8579	aaxbb	bb	ab	bb	bb	bb	bb	bb	bb	bb	bb	bb	bb	bb	bb	bb	bb	bb	bb	bb	bb	bb	bb	bb	bb	bb	bb	bb	aa	ab	bb	bb	aa	ab	aa	ab	bb	ab	aa	bb	bb	bb	aa	aa	bb	aa	aa
A08	107.732	Block8572	aaxbb	bb	ab	bb	bb	bb	bb	bb	bb	bb	bb	bb	bb	bb	bb	bb	bb	bb	bb	bb	bb	bb	bb	bb	bb	bb	bb	bb	aa	ab	bb	bb	aa	ab	aa	ab	bb	ab	aa	bb	bb	bb	aa	aa	bb	aa	aa
A08	107.732	Block8574	aaxbb	bb	ab	bb	bb	bb	bb	bb	bb	bb	bb	bb	bb	bb	bb	bb	bb	bb	bb	bb	bb	bb	bb	bb	bb	bb	bb	bb	aa	ab	bb	bb	aa	ab	aa	ab	bb	ab	aa	bb	bb	bb	aa	aa	bb	aa	aa
A08	107.732	Block8625	aaxbb	bb	ab	bb	bb	bb	bb	bb	bb	bb	bb	bb	bb	bb	bb	bb	bb	bb	bb	bb	bb	bb	bb	bb	bb	bb	bb	bb	aa	ab	bb	bb	aa	ab	aa	ab	bb	ab	aa	bb	bb	bb	aa	aa	bb	aa	aa
A08	107.982	Block8626	aaxbb	bb	ab	bb	bb	bb	bb	bb	bb	bb	bb	bb	bb	bb	bb	bb	bb	bb	bb	bb	bb	bb	bb	bb	bb	bb	bb	bb	aa	ab	bb	bb	aa	ab	aa	ab	bb	ab	aa	bb	bb	bb	aa	aa	bb	aa	aa
A08	107.982	Block8588	aaxbb	bb	ab	bb	bb	bb	bb	bb	bb	bb	bb	bb	bb	bb	bb	bb	bb	bb	bb	bb	bb	bb	bb	bb	bb	bb	bb	bb	aa	ab	bb	bb	aa	ab	aa	ab	bb	ab	aa	bb	bb	bb	aa	aa	bb	aa	aa
A08	107.982	Block8583	aaxbb	bb	ab	bb	bb	bb	bb	bb	bb	bb	bb	bb	bb	bb	bb	bb	bb	bb	bb	bb	bb	bb	bb	bb	bb	bb	bb	bb	aa	ab	bb	bb	aa	ab	aa	ab	bb	ab	aa	bb	bb	bb	aa	aa	bb	aa	aa
A08	107.982	Block8585	aaxbb	bb	ab	bb	bb	bb	bb	bb	bb	bb	bb	bb	bb	bb	bb	bb	bb	bb	bb	bb	bb	bb	bb	bb	bb	bb	bb	bb	aa	ab	bb	bb	aa	ab	aa	ab	bb	ab	aa	bb	bb	bb	aa	aa	bb	aa	aa
A08	107.982	Block8587	aaxbb	bb	ab	bb	bb	bb	bb	bb	bb	bb	bb	bb	bb	bb	bb	bb	bb	bb	bb	bb	bb	bb	bb	bb	bb	bb	bb	bb	aa	ab	bb	bb	aa	ab	aa	ab	bb	ab	aa	bb	bb	bb	aa	aa	bb	aa	aa
A08	107.982	Block8584	aaxbb	bb	ab	bb	bb	bb	bb	bb	bb	bb	bb	bb	bb	bb	bb	bb	bb	bb	bb	bb	bb	bb	bb	bb	bb	bb	bb	bb	aa	ab	bb	bb	aa	ab	aa	ab	bb	ab	aa	bb	bb	bb	aa	aa	bb	aa	aa
A08	107.982	Block8597	aaxbb	bb	ab	bb	bb	bb	bb	bb	bb	bb	bb	bb	bb	bb	bb	bb	bb	bb	bb	bb	bb	bb	bb	bb	bb	bb	bb	bb	aa	ab	bb	bb	aa	ab	aa	ab	bb	ab	aa	bb	bb	bb	aa	aa	bb	aa	aa
A08	108.232	Block8627	aaxbb	bb	ab	bb	bb	bb	bb	bb	bb	bb	bb	bb	bb	bb	bb	bb	bb	bb	bb	bb	bb	bb	bb	bb	bb	bb	bb	bb	aa	ab	bb	bb	aa	ab	aa	ab	bb	ab	aa	bb	bb	bb	aa	aa	bb	aa	aa
A08	108.232	Block8630	aaxbb	bb	ab	bb	bb	bb	bb	bb	bb	bb	bb	bb	bb	bb	bb	bb	bb	bb	bb	bb	bb	bb	bb	bb	bb	bb	bb	bb	aa	ab	bb	bb	aa	ab	aa	ab	bb	ab	aa	bb	bb	bb	aa	aa	bb	aa	aa
A08	108.482	Block8631	aaxbb	bb	ab	bb	bb	bb	bb	bb	bb	bb	bb	bb	bb	bb	bb	bb	bb	bb	bb	bb	bb	bb	bb	bb	bb	bb	bb	bb	aa	ab	bb	bb	aa	ab	aa	ab	bb	ab	aa	bb	bb	bb	aa	aa	bb	aa	aa
A08	108.732	Block8635	aaxbb	bb	ab	bb	bb	bb	bb	bb	bb	bb	bb	bb	bb	bb	bb	bb	bb	bb	bb	bb	bb	bb	bb	bb	bb	bb	bb	bb	aa	ab	bb	bb	aa	ab	aa	ab	bb	ab	aa	bb	bb	bb	aa	aa	bb	aa	aa
A08	108.732	Block8593	aaxbb	bb	ab	bb	bb	bb	bb	bb	bb	bb	bb	bb	bb	bb	bb	bb	bb	bb	bb	bb	bb	bb	bb	bb	bb	bb	bb	bb	aa	ab	bb	bb	aa	ab	aa	ab	bb	ab	aa	bb	bb	bb	aa	aa	bb	aa	aa
A08	108.732	Block8604	aaxbb	bb	ab	bb	bb	bb	bb	bb	bb	bb	bb	bb	bb	bb	bb	bb	bb	bb	bb	bb	bb	bb	bb	bb	bb	bb	bb	bb	aa	ab	bb	bb	aa	ab	aa	ab	bb	ab	aa	bb	bb	bb	aa	aa	bb	aa	aa
A08	108.982	Block8638	aaxbb	bb	ab	bb	bb	bb	bb	bb	bb	bb	bb	bb	bb	bb	bb	bb	bb	bb	bb	bb	bb	bb	bb	bb	bb	bb	bb	bb	aa	ab	bb	bb	aa	ab	aa	ab	bb	ab	aa	bb	bb	bb	aa	aa	bb	aa	aa
A08	109.232	Block8657	aaxbb	bb	ab	bb	bb	bb	bb	bb	bb	bb	bb	bb	bb	bb	bb	bb	bb	bb	bb	bb	bb	bb	bb	bb	bb	bb	bb	bb	aa	ab	bb	bb	aa	ab	aa	ab	bb	ab	aa	bb	bb	bb	aa	aa	bb	aa	aa
A08	109.482	Block8641	aaxbb	bb	ab	bb	bb	bb	bb	bb	bb	bb	bb	bb	bb	bb	bb	bb	bb	bb	bb	bb	bb	bb	bb	bb	bb	bb	bb	bb	aa	ab	bb	bb	aa	ab	aa	ab	bb	ab	aa	bb	bb	bb	aa	aa	bb	aa	aa
A08	109.482	Block8598	aaxbb	bb	ab	bb	bb	bb	bb	bb	bb	bb	bb	bb	bb	bb	bb	bb	bb	bb	bb	bb	bb	bb	bb	bb	bb	bb	bb	bb	aa	ab	bb	bb	aa	ab	aa	ab	bb	ab	aa	bb	bb	bb	aa	aa	bb	aa	aa
A08	109.482	Block8599	aaxbb	bb	ab	bb	bb	bb	bb	bb	bb	bb	bb	bb	bb	bb	bb	bb	bb	bb	bb	bb	bb	bb	bb	bb	bb	bb	bb	bb	aa	ab	bb	bb	aa	ab	aa	ab	bb	ab	aa	bb	bb	bb	aa	aa	bb	aa	aa
A08	109.482	Block8600	aaxbb	bb	ab	bb	bb	bb	bb	bb	bb	bb	bb	bb	bb	bb	bb	bb	bb	bb	bb	bb	bb	bb	bb	bb	bb	bb	bb	bb	aa	ab	bb	bb	aa	ab	aa	ab	bb	ab	aa	bb	bb	bb	aa	aa	bb	aa	aa
A08	109.482	Block8643	aaxbb	bb	ab	bb	bb	bb	bb	bb	bb	bb	bb	bb	bb	bb	bb	bb	bb	bb	bb	bb	bb	bb	bb	bb	bb	bb	bb	bb	aa	ab	bb	bb	aa	ab	aa	ab	bb	ab	aa	bb	bb	bb	aa	aa	bb	aa	aa
A08	109.732	Block8644	aaxbb	bb	ab	bb	bb	bb	bb	bb	bb	bb	bb	bb	bb	bb	bb	bb	bb	bb	bb	bb	bb	bb	bb	bb	bb	bb	bb	bb	aa	ab	bb	bb	aa	ab	aa	ab	bb	ab	aa	bb	bb	bb	aa	aa	bb	aa	aa
A08	109.982	Block8640	aaxbb	bb	ab	bb	bb	bb	bb	bb	bb	bb	bb	bb	bb	bb	bb	bb	bb	bb	bb	bb	bb	bb	bb	bb	bb	bb	bb	bb	aa	ab	bb	bb	aa	ab	aa	ab	bb	ab	aa	bb	bb	bb	aa	aa	bb	aa	aa
A08	109.982	Block8615	aaxbb	bb	ab	bb	bb	bb	bb	bb	bb	bb	bb	bb	bb	bb	bb	bb	bb	bb	bb	bb	bb	bb	bb	bb	bb	bb	bb	bb	aa	ab	bb	bb	aa	ab	aa	ab	bb	ab	aa	bb	bb	bb	aa	aa	bb	aa	aa
A08	109.982	Block8614	aaxbb	bb	ab	bb	bb	bb	bb	bb	bb	bb	bb	bb	bb	bb	bb	bb	bb	bb	bb	bb	bb	bb	bb	bb	bb	bb	bb	bb	aa	ab	bb	bb	aa	ab	aa	ab	bb	ab	aa	bb	bb	bb	aa	aa	bb	aa	aa
A08	109.982	Block8606	aaxbb	bb	ab	bb	bb	bb	bb	bb	bb	bb	bb	bb	bb	bb	bb	bb	bb	bb	bb	bb	bb	bb	bb	bb	bb	bb	bb	bb	aa	ab	bb	bb	aa	ab	aa	ab	bb	ab	aa	bb	bb	bb	aa	aa	bb	aa	aa
A08	109.982	Block8610	aaxbb	bb	ab	bb	bb	bb	bb	bb	bb	bb	bb	bb	bb	bb	bb	bb	bb	bb	bb	bb	bb	bb	bb	bb	bb	bb	bb	bb	aa	ab	bb	bb	aa	ab	aa	ab	bb	ab	aa	bb	bb	bb	aa	aa	bb	aa	aa
A08	109.982	Block8609	aaxbb	bb	ab	bb	bb	bb	bb	bb	bb	bb	bb	bb	bb	bb	bb	bb	bb	bb	bb	bb	bb	bb	bb	bb	bb	bb	bb	bb	aa	ab	bb	bb	aa	ab	aa	ab	bb	ab	aa	bb	bb	bb	aa	aa	bb	aa	aa
A08	109.982	Block8617	aaxbb	bb	ab	bb	bb	bb	bb	bb	bb	bb	bb	bb	bb	bb	bb	bb	bb	bb	bb	bb	bb	bb	bb	bb	bb	bb	bb	bb	aa	ab	bb	bb	aa	ab	aa	ab	bb	ab	aa	bb	bb	bb	aa	aa	bb	aa	aa
A08	109.982	Block8618	aaxbb	bb	ab	bb	bb	bb	bb	bb	bb	bb	bb	bb	bb	bb	bb	bb	bb	bb	bb	bb	bb	bb	bb	bb	bb	bb	bb	bb	aa	ab	bb	bb	aa	ab	aa	ab	bb	ab	aa	bb	bb	bb	aa	aa	bb	aa	aa
A08	109.982	Block8621	aaxbb	bb	ab	bb	bb	bb	bb	bb	bb	bb	bb	bb	bb	bb	bb	bb	bb	bb	bb	bb	bb	bb	bb	bb	bb	bb	bb	bb	aa	ab	bb	bb	aa	ab	aa	ab	bb	ab	aa	bb	bb	bb	aa	aa	bb	aa	aa
A08	109.982	Block8608	aaxbb	bb	ab	bb	bb	bb	bb	bb	bb	bb	bb	bb	bb	bb	bb	bb	bb	bb	bb	bb	bb	bb	bb	bb	bb	bb	bb	bb	aa	ab	bb	bb	aa	ab	aa	ab	bb	ab	aa	bb	bb	bb	aa	aa	bb	aa	aa
A08	109.982	Block8612	aaxbb	bb	ab	bb	bb	bb	bb	bb	bb	bb	bb	bb	bb	bb	bb	bb	bb	bb	bb	bb	bb	bb	bb	bb	bb	bb	bb	bb	aa	ab	bb	bb	aa	ab	aa	ab	bb	ab	aa	bb	bb	bb	aa	aa	bb	aa	aa
A08	109.982	Block8603	aaxbb	bb	ab	bb	bb	bb	bb	bb	bb	bb	bb	bb	bb	bb	bb	bb	bb	bb	bb	bb	bb	bb	bb	bb	bb	bb	bb	bb	aa	ab	bb	bb	aa	ab	aa	ab	bb	ab	aa	bb	bb	bb	aa	aa	bb	aa	aa
A08	109.982	Block8605	aaxbb	bb	ab	bb	bb	bb	bb	bb	bb	bb	bb	bb	bb	bb	bb	bb	bb	bb	bb	bb	bb	bb	bb	bb	bb	bb	bb	bb	aa	ab	bb	bb	aa	ab	aa	ab	bb	ab	aa	bb	bb	bb	aa	aa	bb	aa	aa
A08	109.982	Block8607	aaxbb	bb	ab	bb	bb	bb	bb	bb	bb	bb	bb	bb	bb	bb	bb	bb	bb	bb	bb	bb	bb	bb	bb	bb	bb	bb	bb	bb	aa	ab	bb	bb	aa	ab	aa	ab	bb	ab	aa	bb	bb	bb	aa	aa	bb	aa	aa
A08	109.982	Block8642	aaxbb	bb	ab	bb	bb	bb	bb	bb	bb	bb	bb	bb	bb	bb	bb	bb	bb	bb	bb	bb	bb	bb	bb	bb	bb	bb	bb	bb	aa	ab	bb	bb	aa	ab	aa	ab	bb	ab	aa	bb	bb	bb	aa	aa	bb	aa	aa
A08	110.232	Block8649	aaxbb	bb	ab	bb	bb	bb	bb	bb	bb	bb	bb	bb	bb	bb	bb	bb	bb	bb	bb	bb	bb	bb	bb	bb	bb	bb	bb	bb	aa	ab	bb	bb	aa	ab	aa	ab	bb	ab	aa	bb	bb	bb	aa	aa	bb	aa	aa
A08	110.232	Block8620	aaxbb	bb	ab	bb	bb	bb	bb	bb	bb	bb	bb	bb	bb	bb	bb	bb	bb	bb	bb	bb	bb	bb	bb	bb	bb	bb	bb	bb	aa	ab	bb	bb	aa	ab	aa	ab	bb	ab	aa	bb	bb	bb	aa	aa	bb	aa	aa
A08	110.232	Block8619	aaxbb	bb	ab	bb	bb	bb	bb	bb	bb	bb	bb	bb	bb	bb	bb	bb	bb	bb	bb	bb	bb	bb	bb	bb	bb	bb	bb	bb	aa	ab	bb	bb	aa	ab	aa	ab	bb	ab	aa	bb	bb	bb	aa	aa	bb	aa	aa
A08	110.232	Block8655	aaxbb	bb	ab	bb	bb	bb	bb	bb	bb	bb	bb	bb	bb	bb	bb	bb	bb	bb	bb	bb	bb	bb	bb	bb	bb	bb	bb	bb	aa	ab	bb	bb	aa	ab	aa	ab	bb	ab	aa	bb	bb	bb	aa	aa	bb	aa	aa
A08	110.482	Block8662	aaxbb	bb	ab	bb	bb	bb	bb	bb	bb	bb	bb	bb	bb	bb	bb	bb	bb	bb	bb	bb	bb	bb	bb	bb	bb	bb	bb	bb	aa	ab	bb	bb	aa	ab	aa	ab	bb	ab	aa	bb	bb	bb	aa	aa	bb	aa	aa
A08	110.482	Block8656	aaxbb	bb	ab	bb	bb	bb	bb	bb	bb	bb	bb	bb	bb	bb	bb	bb	bb	bb	bb	bb	bb	bb	bb	bb	bb	bb	bb	bb	aa	ab	bb	bb	aa	ab	aa	ab	bb	ab	aa	bb	bb	bb	aa	aa	bb	aa	aa
A08	110.732	Block8665	aaxbb	bb	ab	bb	bb	bb	bb	bb	bb	bb	bb	bb	bb	bb	bb	bb	bb	bb	bb	bb	bb	bb	bb	bb	bb	bb	bb	bb	aa	ab	bb	bb	aa	ab	aa	ab	bb	ab	aa	bb	bb	bb	aa	aa	bb	aa	aa
A08	110.982	Block8658	aaxbb	bb	ab	bb	bb	bb	bb	bb	bb	bb	bb	bb	bb	bb	bb	bb	bb	bb	bb	bb	bb	bb	bb	bb	bb	bb	bb	bb	aa	ab	bb	bb	aa	ab	aa	ab	bb	ab	aa	bb	bb	bb	aa	aa	bb	aa	aa
A08	111.232	Block8668	aaxbb	bb	ab	bb	bb	bb	bb	bb	bb	bb	bb	bb	bb	bb	bb	bb	bb	bb	bb	bb	bb	bb	bb	bb	bb	bb	bb	bb	aa	ab	bb	bb	aa	ab	aa	ab	bb	ab	aa	bb	bb	bb	aa	aa	bb	aa	aa
A08	111.232	Block8629	aaxbb	bb	ab	bb	bb	bb	bb	bb	bb	bb	bb	bb	bb	bb	bb	bb	bb	bb	bb	bb	bb	bb	bb	bb	bb	bb	bb	bb	aa	ab	bb	bb	aa	ab	aa	ab	bb	ab	aa	bb	bb	bb	aa	aa	bb	aa	aa
A08	111.232	Block8628	aaxbb	bb	ab	bb	bb	bb	bb	bb	bb	bb	bb	bb	bb	bb	bb	bb	bb	bb	bb	bb	bb	bb	bb	bb	bb	bb	bb	bb	aa	ab	bb	bb	aa	ab	aa	ab	bb	ab	aa	bb	bb	bb	aa	aa	bb	aa	aa
A08	111.232	Block8659	aaxbb	bb	ab	bb	bb	bb	bb	bb	bb	bb	bb	bb	bb	bb	bb	bb	bb	bb	bb	bb	bb	bb	bb	bb	bb	bb	bb	bb	aa	ab	bb	bb	aa	ab	aa	ab	bb	ab	aa	bb	bb	bb	aa	aa	bb	aa	aa
A08	111.482	Block8660	aaxbb	bb	ab	bb	bb	bb	bb	bb	bb	bb	bb	bb	bb	bb	bb	bb	bb	bb	bb	bb	bb	bb	bb	bb	bb	bb	bb	bb	aa	ab	bb	bb	aa	ab	aa	ab	bb	ab	aa	bb	bb	bb	aa	aa	bb	aa	aa
A08	111.482	Block8634	aaxbb	bb	ab	bb	bb	bb	bb	bb	bb	bb	bb	bb	bb	bb	bb	bb	bb	bb	bb	bb	bb	bb	bb	bb	bb	bb	bb	bb	aa	ab	bb	bb	aa	ab	aa	ab	bb	ab	aa	bb	bb	bb	aa	aa	bb	aa	aa
A08	111.482	Block8637	aaxbb	bb	ab	bb	bb	bb	bb	bb	bb	bb	bb	bb	bb	bb	bb	bb	bb	bb	bb	bb	bb	bb	bb	bb	bb	bb	bb	bb	aa	ab	bb	bb	aa	ab	aa	ab	bb	ab	aa	bb	bb	bb	aa	aa	bb	aa	aa
A08	111.482	Block8636	aaxbb	bb	ab	bb	bb	bb	bb	bb	bb	bb	bb	bb	bb	bb	bb	bb	bb	bb	bb	bb	bb	bb	bb	bb	bb	bb	bb	bb	aa	ab	bb	bb	aa	ab	aa	ab	bb	ab	aa	bb	bb	bb	aa	aa	bb	aa	aa
A08	111.482	Block8639	aaxbb	bb	ab	bb	bb	bb	bb	bb	bb	bb	bb	bb	bb	bb	bb	bb	bb	bb	bb	bb	bb	bb	bb	bb	bb	bb	bb	bb	aa	ab	bb	bb	aa	ab	aa	ab	bb	ab	aa	bb	bb	bb	aa	aa	bb	aa	aa
A08	111.482	Block8633	aaxbb	bb	ab	bb	bb	bb	bb	bb	bb	bb	bb	bb	bb	bb	bb	bb	bb	bb	bb	bb	bb	bb	bb	bb	bb	bb	bb	bb	aa	ab	bb	bb	aa	ab	aa	ab	bb	ab	aa	bb	bb	bb	aa	aa	bb	aa	aa
A08	111.482	Block8647	aaxbb	bb	ab	bb	bb	bb	bb	bb	bb	bb	bb	bb	bb	bb	bb	bb	bb	bb	bb	bb	bb	bb	bb	bb	bb	bb	bb	bb	aa	ab	bb	bb	aa	ab	aa	ab	bb	ab	aa	bb	bb	bb	aa	aa	bb	aa	aa
A08	111.732	Block8661	aaxbb	bb	ab	bb	bb	bb	bb	bb	bb	bb	bb	bb	bb	bb	bb	bb	bb	bb	bb	bb	bb	bb	bb	bb	bb	bb	bb	bb	aa	ab	bb	bb	aa	ab	aa	bb	bb	ab	aa	bb	bb	bb	aa	aa	bb	aa	aa
A08	111.982	Block8674	aaxbb	bb	ab	bb	bb	bb	bb	bb	bb	bb	bb	bb	bb	bb	bb	bb	bb	bb	bb	bb	bb	bb	bb	bb	bb	bb	bb	bb	aa	ab	bb	bb	aa	ab	aa	bb	bb	ab	aa	bb	bb	bb	aa	aa	bb	aa	aa
A08	112.232	Block8663	aaxbb	bb	ab	bb	bb	bb	bb	bb	bb	bb	bb	bb	bb	bb	bb	bb	bb	bb	bb	bb	bb	bb	bb	bb	bb	bb	bb	bb	aa	ab	bb	bb	ab	ab	aa	bb	bb	ab	aa	bb	bb	bb	aa	aa	bb	aa	aa
A08	112.482	Block8676	aaxbb	bb	ab	bb	bb	bb	bb	bb	bb	bb	bb	bb	bb	bb	bb	bb	bb	bb	bb	bb	bb	bb	bb	bb	bb	bb	bb	bb	aa	ab	bb	bb	ab	ab	aa	bb	bb	ab	aa	bb	bb	bb	aa	aa	bb	aa	aa
A08	112.482	Block8645	aaxbb	bb	ab	bb	bb	bb	bb	bb	bb	bb	bb	bb	bb	bb	bb	bb	bb	bb	bb	bb	bb	bb	bb	bb	bb	bb	bb	bb	aa	ab	bb	bb	ab	ab	aa	bb	bb	ab	aa	bb	bb	bb	aa	aa	bb	aa	aa
A08	112.482	Block8648	aaxbb	bb	ab	bb	bb	bb	bb	bb	bb	bb	bb	bb	bb	bb	bb	bb	bb	bb	bb	bb	bb	bb	bb	bb	bb	bb	bb	bb	aa	ab	bb	bb	ab	ab	aa	bb	bb	ab	aa	bb	bb	bb	aa	aa	bb	aa	aa
A08	112.482	Block8646	aaxbb	bb	ab	bb	bb	bb	bb	bb	bb	bb	bb	bb	bb	bb	bb	bb	bb	bb	bb	bb	bb	bb	bb	bb	bb	bb	bb	bb	aa	ab	bb	bb	ab	ab	aa	bb	bb	ab	aa	bb	bb	bb	aa	aa	bb	aa	aa
A08	112.482	Block8666	aaxbb	bb	ab	bb	bb	bb	bb	bb	bb	bb	bb	bb	bb	bb	bb	bb	bb	bb	bb	bb	bb	bb	bb	bb	bb	bb	bb	bb	aa	ab	bb	bb	ab	ab	aa	bb	bb	ab	aa	bb	bb	bb	aa	aa	bb	aa	aa
A08	112.732	Block8667	aaxbb	bb	ab	bb	bb	bb	bb	bb	bb	bb	bb	bb	bb	bb	bb	bb	bb	bb	bb	bb	bb	bb	bb	bb	bb	bb	bb	bb	aa	ab	bb	bb	ab	ab	aa	bb	bb	ab	aa	bb	bb	bb	aa	aa	bb	aa	aa
A08	112.982	Block8669	aaxbb	bb	ab	bb	bb	bb	bb	bb	bb	bb	bb	bb	bb	bb	bb	bb	bb	bb	bb	bb	bb	bb	bb	bb	bb	bb	bb	bb	aa	ab	bb	bb	ab	ab	aa	bb	bb	ab	aa	bb	bb	bb	aa	aa	bb	aa	aa
A08	112.982	Block8671	aaxbb	bb	ab	bb	bb	bb	bb	bb	bb	bb	bb	bb	bb	bb	bb	bb	bb	bb	bb	bb	bb	bb	bb	bb	bb	bb	bb	bb	aa	ab	bb	bb	ab	ab	aa	bb	bb	ab	aa	bb	bb	bb	aa	aa	bb	aa	aa
A08	113.232	Block8672	aaxbb	bb	ab	bb	bb	bb	bb	bb	bb	bb	bb	bb	bb	bb	bb	bb	bb	bb	bb	bb	bb	bb	bb	bb	bb	bb	bb	bb	aa	ab	bb	bb	ab	ab	aa	bb	bb	ab	aa	bb	bb	bb	aa	aa	bb	aa	aa
A08	113.232	Block8651	aaxbb	bb	ab	bb	bb	bb	bb	bb	bb	bb	bb	bb	bb	bb	bb	bb	bb	bb	bb	bb	bb	bb	bb	bb	bb	bb	bb	bb	aa	ab	bb	bb	ab	ab	aa	bb	bb	ab	aa	bb	bb	bb	aa	aa	bb	aa	aa
A08	113.232	Block8652	aaxbb	bb	ab	bb	bb	bb	bb	bb	bb	bb	bb	bb	bb	bb	bb	bb	bb	bb	bb	bb	bb	bb	bb	bb	bb	bb	bb	bb	aa	ab	bb	bb	ab	ab	aa	bb	bb	ab	aa	bb	bb	bb	aa	aa	bb	aa	aa
A08	113.232	Block8653	aaxbb	bb	ab	bb	bb	bb	bb	bb	bb	bb	bb	bb	bb	bb	bb	bb	bb	bb	bb	bb	bb	bb	bb	bb	bb	bb	bb	bb	aa	ab	bb	bb	ab	ab	aa	bb	bb	ab	aa	bb	bb	bb	aa	aa	bb	aa	aa
A08	113.232	Block8650	aaxbb	bb	ab	bb	bb	bb	bb	bb	bb	bb	bb	bb	bb	bb	bb	bb	bb	bb	bb	bb	bb	bb	bb	bb	bb	bb	bb	bb	aa	ab	bb	bb	ab	ab	aa	bb	bb	ab	aa	bb	bb	bb	aa	aa	bb	aa	aa
A08	113.232	Block8654	aaxbb	bb	ab	bb	bb	bb	bb	bb	bb	bb	bb	bb	bb	bb	bb	bb	bb	bb	bb	bb	bb	bb	bb	bb	bb	bb	bb	bb	aa	ab	bb	bb	ab	ab	aa	bb	bb	ab	aa	bb	bb	bb	aa	aa	bb	aa	aa
A08	113.232	Block8673	aaxbb	bb	ab	bb	bb	bb	bb	bb	bb	bb	bb	bb	bb	bb	bb	bb	bb	bb	bb	bb	bb	bb	bb	bb	bb	bb	bb	bb	aa	ab	bb	bb	ab	ab	aa	bb	bb	ab	aa	bb	bb	bb	aa	aa	bb	aa	aa
A08	113.482	Block8684	aaxbb	bb	ab	bb	bb	bb	bb	bb	bb	bb	bb	bb	bb	bb	bb	bb	bb	bb	bb	bb	bb	bb	bb	bb	bb	bb	bb	bb	aa	ab	bb	bb	ab	ab	aa	bb	bb	ab	aa	bb	bb	bb	aa	aa	bb	aa	aa
A08	113.732	Block8675	aaxbb	bb	ab	bb	bb	bb	bb	bb	bb	bb	bb	bb	bb	bb	bb	bb	bb	bb	bb	bb	bb	bb	bb	bb	bb	bb	bb	bb	aa	ab	bb	bb	ab	ab	aa	bb	bb	ab	aa	bb	bb	bb	aa	aa	bb	aa	aa
A08	113.982	Block8698	aaxbb	bb	ab	bb	bb	bb	bb	bb	bb	bb	bb	bb	bb	bb	bb	bb	bb	bb	bb	bb	bb	bb	bb	bb	bb	bb	bb	bb	aa	ab	bb	bb	ab	ab	aa	bb	bb	ab	aa	bb	bb	bb	aa	aa	ab	aa	aa
A08	114.232	Block8677	aaxbb	bb	ab	bb	bb	bb	bb	bb	bb	bb	bb	bb	bb	bb	bb	bb	bb	bb	bb	bb	bb	bb	bb	bb	bb	bb	bb	bb	aa	ab	bb	bb	ab	ab	aa	bb	bb	ab	aa	bb	bb	bb	aa	aa	ab	aa	aa
A08	114.732	Block8682	aaxbb	bb	bb	bb	bb	bb	bb	bb	bb	bb	bb	bb	bb	bb	bb	bb	bb	bb	bb	bb	bb	bb	bb	bb	bb	bb	bb	bb	aa	ab	bb	bb	ab	ab	aa	bb	bb	ab	aa	bb	bb	bb	aa	aa	ab	aa	aa
A08	114.982	Block8683	aaxbb	bb	bb	bb	bb	bb	bb	bb	bb	bb	bb	bb	bb	bb	bb	bb	bb	bb	bb	bb	bb	bb	bb	bb	bb	bb	bb	bb	aa	ab	bb	bb	ab	ab	aa	bb	bb	ab	aa	bb	bb	bb	aa	aa	ab	aa	aa
A08	115.233	Block8685	aaxbb	bb	bb	bb	bb	bb	bb	bb	bb	bb	bb	bb	bb	bb	bb	bb	bb	bb	bb	bb	bb	bb	bb	bb	bb	bb	bb	bb	aa	ab	bb	bb	ab	ab	aa	bb	bb	ab	aa	bb	bb	bb	aa	aa	ab	aa	aa
A08	115.733	Block8691	aaxbb	bb	bb	bb	bb	bb	bb	bb	bb	bb	bb	bb	bb	bb	bb	bb	bb	bb	bb	bb	bb	bb	bb	bb	bb	bb	bb	bb	aa	ab	bb	bb	ab	ab	aa	bb	bb	ab	aa	bb	bb	bb	aa	aa	ab	aa	aa
A08	115.733	Block8664	aaxbb	bb	bb	bb	bb	bb	bb	bb	bb	bb	bb	bb	bb	bb	bb	bb	bb	bb	bb	bb	bb	bb	bb	bb	bb	bb	bb	bb	aa	ab	bb	bb	ab	ab	aa	bb	bb	ab	aa	bb	bb	bb	aa	aa	ab	aa	aa
A08	115.733	Block8692	aaxbb	bb	bb	bb	bb	bb	bb	bb	bb	bb	bb	bb	bb	bb	bb	bb	bb	bb	bb	bb	bb	bb	bb	bb	bb	bb	bb	bb	aa	ab	bb	bb	ab	ab	aa	bb	bb	ab	aa	bb	bb	bb	aa	aa	ab	aa	aa
A08	115.983	Block8706	aaxbb	bb	bb	bb	bb	bb	bb	bb	bb	bb	bb	bb	bb	bb	bb	bb	bb	bb	bb	bb	bb	bb	bb	bb	bb	bb	bb	bb	aa	ab	bb	bb	ab	ab	aa	bb	bb	ab	aa	bb	bb	bb	aa	aa	ab	aa	aa
A08	116.233	Block8699	aaxbb	bb	bb	bb	bb	bb	bb	bb	bb	bb	bb	bb	bb	bb	bb	bb	bb	bb	bb	bb	bb	bb	bb	bb	bb	bb	bb	bb	aa	ab	bb	bb	ab	ab	aa	bb	bb	ab	aa	bb	bb	bb	aa	aa	ab	aa	aa
A08	116.233	Block8696	aaxbb	bb	bb	bb	bb	bb	bb	bb	bb	bb	bb	bb	bb	bb	bb	bb	bb	bb	bb	bb	bb	bb	bb	bb	bb	bb	bb	bb	aa	ab	bb	bb	ab	ab	aa	bb	bb	ab	aa	bb	bb	bb	aa	aa	ab	aa	aa
A08	116.483	Block8697	aaxbb	bb	bb	bb	bb	bb	bb	bb	bb	bb	bb	bb	bb	bb	bb	bb	bb	bb	bb	bb	bb	bb	bb	bb	bb	bb	bb	bb	aa	ab	ab	bb	ab	ab	aa	bb	bb	ab	aa	bb	bb	bb	aa	aa	ab	aa	aa
A08	116.483	Block8670	aaxbb	bb	bb	bb	bb	bb	bb	bb	bb	bb	bb	bb	bb	bb	bb	bb	bb	bb	bb	bb	bb	bb	bb	bb	bb	bb	bb	bb	aa	ab	ab	bb	ab	ab	aa	bb	bb	ab	aa	bb	bb	bb	aa	aa	ab	aa	aa
A08	116.483	Block8678	aaxbb	bb	bb	bb	bb	bb	bb	bb	bb	bb	bb	bb	bb	bb	bb	bb	bb	bb	bb	bb	bb	bb	bb	bb	bb	bb	bb	bb	aa	ab	ab	bb	ab	ab	aa	bb	bb	ab	aa	bb	bb	bb	aa	aa	ab	aa	aa
A08	116.733	Block8702	aaxbb	bb	bb	bb	bb	bb	bb	bb	bb	bb	bb	bb	bb	bb	bb	bb	bb	bb	bb	bb	bb	bb	bb	bb	bb	bb	bb	bb	aa	ab	ab	bb	ab	ab	aa	bb	bb	ab	aa	bb	bb	bb	aa	aa	ab	aa	aa
A08	116.733	Block8693	aaxbb	bb	bb	bb	bb	bb	bb	bb	bb	bb	bb	bb	bb	bb	bb	bb	bb	bb	bb	bb	bb	bb	bb	bb	bb	bb	bb	bb	aa	ab	ab	bb	ab	ab	aa	bb	bb	ab	aa	bb	bb	bb	aa	aa	ab	aa	aa
A08	116.983	Block8700	aaxbb	bb	bb	bb	bb	bb	bb	bb	bb	bb	bb	bb	bb	bb	bb	bb	bb	bb	bb	bb	bb	bb	bb	bb	bb	bb	bb	bb	aa	ab	ab	bb	ab	ab	aa	bb	bb	ab	aa	bb	bb	bb	aa	aa	ab	aa	aa
A08	117.233	Block8705	aaxbb	bb	bb	bb	bb	bb	bb	bb	bb	bb	bb	bb	bb	bb	bb	bb	bb	bb	bb	bb	bb	bb	bb	bb	bb	bb	bb	bb	aa	ab	ab	bb	ab	ab	aa	bb	bb	ab	aa	bb	bb	bb	aa	aa	ab	aa	aa
A08	117.483	Block8713	aaxbb	bb	bb	bb	bb	bb	bb	bb	bb	bb	bb	bb	bb	bb	bb	bb	bb	bb	bb	bb	bb	bb	bb	bb	bb	bb	bb	bb	aa	ab	ab	bb	ab	ab	aa	bb	bb	ab	aa	bb	bb	bb	aa	aa	ab	aa	aa
A08	117.733	Block8707	aaxbb	bb	bb	bb	bb	bb	bb	bb	bb	bb	bb	bb	bb	bb	bb	bb	bb	bb	bb	bb	bb	bb	bb	bb	bb	bb	bb	bb	aa	ab	ab	bb	ab	ab	aa	bb	bb	ab	aa	bb	bb	bb	aa	aa	ab	aa	aa
A08	117.983	Block8708	aaxbb	bb	bb	bb	bb	bb	bb	bb	bb	bb	bb	bb	bb	bb	bb	bb	bb	bb	bb	bb	bb	bb	bb	bb	bb	bb	bb	bb	aa	ab	ab	bb	ab	ab	aa	bb	bb	ab	aa	bb	bb	bb	aa	aa	ab	aa	aa
A08	117.983	Block8679	aaxbb	bb	bb	bb	bb	bb	bb	bb	bb	bb	bb	bb	bb	bb	bb	bb	bb	bb	bb	bb	bb	bb	bb	bb	bb	bb	bb	bb	aa	ab	ab	bb	ab	ab	aa	bb	bb	ab	aa	bb	bb	bb	aa	aa	ab	aa	aa
A08	117.983	Block8701	aaxbb	bb	bb	bb	bb	bb	bb	bb	bb	bb	bb	bb	bb	bb	bb	bb	bb	bb	bb	bb	bb	bb	bb	bb	bb	bb	bb	bb	aa	ab	ab	bb	ab	ab	aa	bb	bb	ab	aa	bb	bb	bb	aa	aa	ab	aa	aa
A08	118.233	Block8716	aaxbb	bb	bb	bb	bb	bb	bb	bb	bb	bb	bb	bb	bb	bb	bb	bb	bb	bb	bb	bb	bb	bb	bb	bb	bb	bb	bb	bb	aa	ab	ab	bb	ab	ab	aa	bb	bb	ab	ab	bb	bb	bb	aa	aa	ab	aa	aa
A08	118.233	Block8681	aaxbb	bb	bb	bb	bb	bb	bb	bb	bb	bb	bb	bb	bb	bb	bb	bb	bb	bb	bb	bb	bb	bb	bb	bb	bb	bb	bb	bb	aa	ab	ab	bb	ab	ab	aa	bb	bb	ab	ab	bb	bb	bb	aa	aa	ab	aa	aa
A08	118.233	Block8680	aaxbb	bb	bb	bb	bb	bb	bb	bb	bb	bb	bb	bb	bb	bb	bb	bb	bb	bb	bb	bb	bb	bb	bb	bb	bb	bb	bb	bb	aa	ab	ab	bb	ab	ab	aa	bb	bb	ab	ab	bb	bb	bb	aa	aa	ab	aa	aa
A08	118.233	Block8709	aaxbb	bb	bb	bb	bb	bb	bb	bb	bb	bb	bb	bb	bb	bb	bb	bb	bb	bb	bb	bb	bb	bb	bb	bb	bb	bb	bb	bb	aa	ab	ab	bb	ab	ab	aa	bb	bb	ab	ab	bb	bb	bb	aa	aa	ab	aa	aa
A08	118.483	Block8712	aaxbb	bb	bb	bb	bb	bb	bb	bb	bb	bb	bb	bb	bb	bb	bb	bb	bb	bb	bb	bb	bb	bb	bb	bb	bb	bb	bb	bb	aa	ab	ab	bb	ab	ab	aa	bb	bb	ab	ab	bb	bb	bb	aa	aa	ab	aa	aa
A08	118.483	Block8687	aaxbb	bb	bb	bb	bb	bb	bb	bb	bb	bb	bb	bb	bb	bb	bb	bb	bb	bb	bb	bb	bb	bb	bb	bb	bb	bb	bb	bb	aa	ab	ab	bb	ab	ab	aa	bb	bb	ab	ab	bb	bb	bb	aa	aa	ab	aa	aa
A08	118.483	Block8688	aaxbb	bb	bb	bb	bb	bb	bb	bb	bb	bb	bb	bb	bb	bb	bb	bb	bb	bb	bb	bb	bb	bb	bb	bb	bb	bb	bb	bb	aa	ab	ab	bb	ab	ab	aa	bb	bb	ab	ab	bb	bb	bb	aa	aa	ab	aa	aa
A08	118.483	Block8689	aaxbb	bb	bb	bb	bb	bb	bb	bb	bb	bb	bb	bb	bb	bb	bb	bb	bb	bb	bb	bb	bb	bb	bb	bb	bb	bb	bb	bb	aa	ab	ab	bb	ab	ab	aa	bb	bb	ab	ab	bb	bb	bb	aa	aa	ab	aa	aa
A08	118.483	Block8686	aaxbb	bb	bb	bb	bb	bb	bb	bb	bb	bb	bb	bb	bb	bb	bb	bb	bb	bb	bb	bb	bb	bb	bb	bb	bb	bb	bb	bb	aa	ab	ab	bb	ab	ab	aa	bb	bb	ab	ab	bb	bb	bb	aa	aa	ab	aa	aa
A08	118.483	Block8690	aaxbb	bb	bb	bb	bb	bb	bb	bb	bb	bb	bb	bb	bb	bb	bb	bb	bb	bb	bb	bb	bb	bb	bb	bb	bb	bb	bb	bb	aa	ab	ab	bb	ab	ab	aa	bb	bb	ab	ab	bb	bb	bb	aa	aa	ab	aa	aa
A08	118.483	Block8711	aaxbb	bb	bb	bb	bb	bb	bb	bb	bb	bb	bb	bb	bb	bb	bb	bb	bb	bb	bb	bb	bb	bb	bb	bb	bb	bb	bb	bb	aa	ab	ab	bb	ab	ab	aa	bb	bb	ab	ab	bb	bb	bb	aa	aa	ab	aa	aa
A08	118.733	Block8722	aaxbb	bb	bb	bb	bb	bb	bb	bb	bb	bb	bb	bb	bb	bb	bb	bb	bb	bb	bb	bb	bb	bb	bb	bb	bb	bb	bb	bb	aa	ab	ab	bb	ab	ab	aa	bb	bb	ab	ab	bb	bb	bb	aa	aa	ab	aa	aa
A08	118.733	Block8710	aaxbb	bb	bb	bb	bb	bb	bb	bb	bb	bb	bb	bb	bb	bb	bb	bb	bb	bb	bb	bb	bb	bb	bb	bb	bb	bb	bb	bb	aa	ab	ab	bb	ab	ab	aa	bb	bb	ab	ab	bb	bb	bb	aa	aa	ab	aa	aa
A08	118.983	Block8724	aaxbb	bb	bb	bb	bb	bb	bb	bb	bb	bb	bb	bb	bb	bb	bb	bb	bb	bb	bb	bb	bb	bb	bb	bb	bb	bb	bb	bb	aa	ab	ab	bb	ab	ab	aa	bb	bb	ab	ab	bb	bb	bb	aa	aa	ab	aa	aa
A08	119.233	Block8725	aaxbb	bb	bb	bb	bb	bb	bb	bb	bb	bb	bb	bb	bb	bb	bb	bb	bb	bb	bb	bb	bb	bb	bb	bb	bb	bb	bb	bb	aa	ab	ab	bb	ab	ab	aa	bb	bb	ab	ab	bb	bb	bb	aa	aa	ab	aa	aa
A08	119.233	Block8694	aaxbb	bb	bb	bb	bb	bb	bb	bb	bb	bb	bb	bb	bb	bb	bb	bb	bb	bb	bb	bb	bb	bb	bb	bb	bb	bb	bb	bb	aa	ab	ab	bb	ab	ab	aa	bb	bb	ab	ab	bb	bb	bb	aa	aa	ab	aa	aa
A08	119.233	Block8695	aaxbb	bb	bb	bb	bb	bb	bb	bb	bb	bb	bb	bb	bb	bb	bb	bb	bb	bb	bb	bb	bb	bb	bb	bb	bb	bb	bb	bb	aa	ab	ab	bb	ab	ab	aa	bb	bb	ab	ab	bb	bb	bb	aa	aa	ab	aa	aa
A08	119.233	Block8714	aaxbb	bb	bb	bb	bb	bb	bb	bb	bb	bb	bb	bb	bb	bb	bb	bb	bb	bb	bb	bb	bb	bb	bb	bb	bb	bb	bb	bb	aa	ab	ab	bb	ab	ab	aa	bb	bb	ab	ab	bb	bb	bb	aa	aa	ab	aa	aa
A08	119.483	Block8727	aaxbb	bb	bb	bb	bb	bb	bb	bb	bb	bb	bb	bb	bb	bb	bb	bb	bb	bb	bb	bb	bb	bb	bb	bb	bb	bb	bb	bb	aa	ab	ab	bb	ab	ab	aa	bb	bb	ab	ab	bb	bb	bb	aa	aa	ab	aa	aa
A08	119.483	Block8703	aaxbb	bb	bb	bb	bb	bb	bb	bb	bb	bb	bb	bb	bb	bb	bb	bb	bb	bb	bb	bb	bb	bb	bb	bb	bb	bb	bb	bb	aa	ab	ab	bb	ab	ab	aa	bb	bb	ab	ab	bb	bb	bb	aa	aa	ab	aa	aa
A08	119.483	Block8704	aaxbb	bb	bb	bb	bb	bb	bb	bb	bb	bb	bb	bb	bb	bb	bb	bb	bb	bb	bb	bb	bb	bb	bb	bb	bb	bb	bb	bb	aa	ab	ab	bb	ab	ab	aa	bb	bb	ab	ab	bb	bb	bb	aa	aa	ab	aa	aa
A08	119.483	Block8715	aaxbb	bb	bb	bb	bb	bb	bb	bb	bb	bb	bb	bb	bb	bb	bb	bb	bb	bb	bb	bb	bb	bb	bb	bb	bb	bb	bb	bb	aa	ab	ab	bb	ab	ab	aa	bb	bb	ab	ab	bb	bb	bb	aa	aa	ab	aa	aa
A08	119.733	Block8726	aaxbb	bb	bb	bb	bb	bb	bb	bb	bb	bb	bb	bb	bb	bb	bb	bb	bb	bb	bb	bb	bb	bb	bb	bb	bb	bb	bb	bb	aa	ab	ab	bb	ab	ab	aa	bb	bb	ab	ab	bb	bb	bb	aa	aa	ab	aa	aa
A08	120.483	Block8717	aaxbb	bb	bb	bb	bb	bb	bb	bb	bb	bb	bb	bb	bb	bb	bb	bb	bb	bb	bb	bb	bb	bb	bb	bb	bb	bb	bb	bb	aa	ab	ab	bb	ab	ab	aa	bb	bb	ab	ab	bb	bb	bb	aa	aa	ab	aa	aa
A08	120.983	Block8736	aaxbb	bb	bb	bb	bb	bb	bb	bb	bb	bb	bb	bb	bb	bb	bb	bb	bb	bb	bb	bb	bb	bb	bb	bb	bb	bb	bb	bb	aa	ab	ab	bb	ab	ab	aa	bb	bb	ab	ab	bb	bb	bb	aa	aa	ab	aa	aa
A08	122.233	Block8723	aaxbb	bb	bb	bb	bb	bb	bb	bb	bb	bb	bb	bb	bb	bb	bb	bb	bb	bb	bb	bb	bb	bb	bb	bb	bb	bb	bb	bb	ab	ab	ab	bb	ab	ab	aa	bb	bb	ab	ab	bb	bb	bb	aa	aa	ab	aa	aa
A08	123.734	Block8743	aaxbb	bb	bb	bb	bb	bb	bb	bb	bb	bb	bb	bb	bb	bb	bb	bb	bb	bb	bb	bb	bb	bb	bb	bb	bb	bb	bb	bb	ab	ab	ab	bb	ab	ab	aa	bb	bb	ab	ab	bb	bb	ab	aa	aa	ab	aa	aa
A08	123.984	Block8728	aaxbb	bb	bb	bb	bb	bb	bb	bb	bb	bb	bb	bb	bb	bb	bb	bb	bb	bb	bb	bb	bb	bb	bb	bb	bb	bb	bb	bb	ab	ab	ab	bb	ab	ab	aa	bb	bb	ab	ab	bb	bb	ab	aa	aa	ab	aa	aa
A08	124.234	Block8731	aaxbb	bb	bb	bb	bb	bb	bb	bb	bb	bb	bb	bb	bb	bb	bb	bb	bb	bb	bb	bb	bb	bb	bb	bb	bb	bb	bb	bb	ab	ab	ab	bb	ab	ab	aa	bb	bb	ab	ab	bb	bb	ab	aa	aa	ab	aa	aa
A08	124.984	Block8735	aaxbb	bb	bb	bb	bb	bb	bb	bb	bb	bb	bb	bb	bb	bb	bb	bb	bb	bb	bb	bb	bb	bb	bb	bb	bb	bb	bb	bb	ab	ab	ab	bb	ab	ab	aa	bb	bb	ab	ab	bb	bb	ab	aa	aa	ab	aa	aa
A08	124.984	Block8730	aaxbb	bb	bb	bb	bb	bb	bb	bb	bb	bb	bb	bb	bb	bb	bb	bb	bb	bb	bb	bb	bb	bb	bb	bb	bb	bb	bb	bb	ab	ab	ab	bb	ab	ab	aa	bb	bb	ab	ab	bb	bb	ab	aa	aa	ab	aa	aa
A08	125.489	Block8738	aaxbb	bb	bb	bb	bb	bb	bb	bb	bb	bb	bb	bb	bb	bb	bb	bb	bb	bb	bb	bb	bb	bb	bb	bb	bb	bb	bb	bb	ab	ab	ab	bb	ab	ab	aa	bb	bb	ab	ab	bb	bb	ab	aa	aa	ab	aa	aa
A08	135.13	Block8747	aaxbb	bb	bb	bb	bb	bb	bb	bb	bb	bb	bb	bb	bb	bb	bb	bb	bb	bb	bb	bb	bb	bb	bb	bb	bb	bb	bb	bb	ab	ab	ab	bb	ab	ab	bb	bb	bb	ab	ab	bb	bb	ab	bb	bb	bb	bb	bb
A08	147.901	Block8745	aaxbb	aa	aa	aa	bb	aa	aa	aa	bb	aa	aa	aa	aa	aa	bb	aa	aa	bb	bb	aa	aa	bb	aa	aa	aa	bb	bb	aa	ab	ab	ab	aa	ab	ab	bb	aa	bb	ab	ab	bb	aa	ab	bb	bb	bb	bb	bb
A08	152.862	Block8760	aaxbb	aa	aa	aa	aa	aa	aa	aa	aa	aa	aa	aa	aa	aa	aa	aa	aa	aa	aa	aa	aa	aa	aa	aa	aa	aa	aa	aa	ab	ab	ab	aa	ab	ab	bb	aa	aa	ab	ab	aa	aa	ab	bb	bb	bb	bb	bb
A08	153.862	Block8759	aaxbb	aa	aa	aa	aa	aa	aa	aa	aa	aa	aa	aa	aa	aa	aa	aa	aa	aa	aa	aa	aa	aa	aa	aa	aa	aa	aa	aa	ab	ab	ab	aa	ab	ab	bb	aa	aa	ab	ab	aa	aa	ab	bb	bb	bb	bb	bb
A08	154.613	Block8762	aaxbb	aa	aa	aa	aa	aa	aa	aa	aa	aa	aa	aa	aa	aa	aa	aa	aa	aa	aa	aa	aa	aa	aa	aa	aa	aa	aa	aa	ab	ab	ab	aa	ab	ab	bb	aa	aa	ab	ab	aa	aa	ab	bb	bb	bb	bb	bb
A08	154.863	Block8781	aaxbb	aa	aa	aa	aa	aa	aa	aa	aa	aa	aa	aa	aa	aa	aa	aa	aa	aa	aa	aa	aa	aa	aa	aa	aa	aa	aa	aa	ab	ab	ab	aa	ab	ab	bb	aa	aa	ab	ab	aa	aa	ab	bb	bb	bb	bb	bb
A08	156.363	Block8779	aaxbb	aa	aa	aa	aa	aa	aa	aa	aa	aa	aa	aa	aa	aa	aa	aa	aa	aa	aa	aa	aa	aa	aa	aa	aa	aa	aa	aa	ab	ab	ab	aa	ab	aa	bb	aa	aa	ab	ab	aa	aa	ab	bb	bb	bb	bb	bb
A08	156.363	Block8721	aaxbb	aa	aa	aa	aa	aa	aa	aa	aa	aa	aa	aa	aa	aa	aa	aa	aa	aa	aa	aa	aa	aa	aa	aa	aa	aa	aa	aa	ab	ab	ab	aa	ab	aa	bb	aa	aa	ab	ab	aa	aa	ab	bb	bb	bb	bb	bb
A08	156.363	Block8719	aaxbb	aa	aa	aa	aa	aa	aa	aa	aa	aa	aa	aa	aa	aa	aa	aa	aa	aa	aa	aa	aa	aa	aa	aa	aa	aa	aa	aa	ab	ab	ab	aa	ab	aa	bb	aa	aa	ab	ab	aa	aa	ab	bb	bb	bb	bb	bb
A08	156.363	Block8720	aaxbb	aa	aa	aa	aa	aa	aa	aa	aa	aa	aa	aa	aa	aa	aa	aa	aa	aa	aa	aa	aa	aa	aa	aa	aa	aa	aa	aa	ab	ab	ab	aa	ab	aa	bb	aa	aa	ab	ab	aa	aa	ab	bb	bb	bb	bb	bb
A08	156.363	Block8718	aaxbb	aa	aa	aa	aa	aa	aa	aa	aa	aa	aa	aa	aa	aa	aa	aa	aa	aa	aa	aa	aa	aa	aa	aa	aa	aa	aa	aa	ab	ab	ab	aa	ab	aa	bb	aa	aa	ab	ab	aa	aa	ab	bb	bb	bb	bb	bb
A08	156.363	Block8749	aaxbb	aa	aa	aa	aa	aa	aa	aa	aa	aa	aa	aa	aa	aa	aa	aa	aa	aa	aa	aa	aa	aa	aa	aa	aa	aa	aa	aa	ab	ab	ab	aa	ab	aa	bb	aa	aa	ab	ab	aa	aa	ab	bb	bb	bb	bb	bb
A08	156.613	Block8773	aaxbb	aa	aa	aa	aa	aa	aa	aa	aa	aa	aa	aa	aa	aa	aa	aa	aa	aa	aa	aa	aa	aa	aa	aa	aa	aa	aa	aa	ab	ab	ab	aa	ab	aa	bb	aa	aa	ab	ab	aa	aa	ab	bb	bb	bb	bb	bb
A08	156.863	Block8758	aaxbb	aa	aa	aa	aa	aa	aa	aa	aa	aa	aa	aa	aa	aa	aa	aa	aa	aa	aa	aa	aa	aa	aa	aa	aa	aa	aa	aa	ab	ab	ab	aa	ab	aa	bb	aa	aa	ab	ab	aa	aa	ab	bb	bb	bb	bb	bb
A08	156.863	Block8774	aaxbb	aa	aa	aa	aa	aa	aa	aa	aa	aa	aa	aa	aa	aa	aa	aa	aa	aa	aa	aa	aa	aa	aa	aa	aa	aa	aa	aa	ab	ab	ab	aa	ab	aa	bb	aa	aa	ab	ab	aa	aa	ab	bb	bb	bb	bb	bb
A08	157.113	Block8772	aaxbb	aa	aa	aa	aa	aa	aa	aa	aa	aa	aa	aa	aa	aa	aa	aa	aa	aa	aa	aa	aa	aa	aa	aa	aa	aa	aa	aa	ab	ab	ab	aa	ab	aa	bb	aa	aa	ab	ab	aa	aa	ab	bb	bb	bb	bb	bb
A08	157.113	Block8729	aaxbb	aa	aa	aa	aa	aa	aa	aa	aa	aa	aa	aa	aa	aa	aa	aa	aa	aa	aa	aa	aa	aa	aa	aa	aa	aa	aa	aa	ab	ab	ab	aa	ab	aa	bb	aa	aa	ab	ab	aa	aa	ab	bb	bb	bb	bb	bb
A08	157.113	Block8737	aaxbb	aa	aa	aa	aa	aa	aa	aa	aa	aa	aa	aa	aa	aa	aa	aa	aa	aa	aa	aa	aa	aa	aa	aa	aa	aa	aa	aa	ab	ab	ab	aa	ab	aa	bb	aa	aa	ab	ab	aa	aa	ab	bb	bb	bb	bb	bb
A08	157.113	Block8778	aaxbb	aa	aa	aa	aa	aa	aa	aa	aa	aa	aa	aa	aa	aa	aa	aa	aa	aa	aa	aa	aa	aa	aa	aa	aa	aa	aa	aa	ab	ab	ab	aa	ab	aa	bb	aa	aa	ab	ab	aa	aa	ab	bb	bb	bb	bb	bb
A08	157.363	Block8770	aaxbb	aa	ab	aa	aa	aa	aa	aa	aa	aa	aa	aa	aa	aa	aa	aa	aa	aa	aa	aa	aa	aa	aa	aa	aa	aa	aa	aa	ab	ab	ab	aa	ab	aa	bb	aa	aa	ab	ab	aa	aa	ab	bb	bb	bb	bb	bb
A08	157.363	Block8732	aaxbb	aa	ab	aa	aa	aa	aa	aa	aa	aa	aa	aa	aa	aa	aa	aa	aa	aa	aa	aa	aa	aa	aa	aa	aa	aa	aa	aa	ab	ab	ab	aa	ab	aa	bb	aa	aa	ab	ab	aa	aa	ab	bb	bb	bb	bb	bb
A08	157.363	Block8733	aaxbb	aa	ab	aa	aa	aa	aa	aa	aa	aa	aa	aa	aa	aa	aa	aa	aa	aa	aa	aa	aa	aa	aa	aa	aa	aa	aa	aa	ab	ab	ab	aa	ab	aa	bb	aa	aa	ab	ab	aa	aa	ab	bb	bb	bb	bb	bb
A08	157.363	Block8734	aaxbb	aa	ab	aa	aa	aa	aa	aa	aa	aa	aa	aa	aa	aa	aa	aa	aa	aa	aa	aa	aa	aa	aa	aa	aa	aa	aa	aa	ab	ab	ab	aa	ab	aa	bb	aa	aa	ab	ab	aa	aa	ab	bb	bb	bb	bb	bb
A08	157.363	Block8775	aaxbb	aa	ab	aa	aa	aa	aa	aa	aa	aa	aa	aa	aa	aa	aa	aa	aa	aa	aa	aa	aa	aa	aa	aa	aa	aa	aa	aa	ab	ab	ab	aa	ab	aa	bb	aa	aa	ab	ab	aa	aa	ab	bb	bb	bb	bb	bb
A08	157.613	Block8761	aaxbb	aa	ab	aa	aa	aa	aa	aa	aa	aa	aa	aa	aa	aa	aa	aa	aa	aa	aa	aa	aa	aa	aa	aa	aa	aa	aa	aa	ab	ab	ab	aa	ab	aa	bb	aa	aa	ab	ab	aa	aa	ab	bb	bb	bb	bb	bb
A08	157.863	Block8767	aaxbb	aa	ab	aa	aa	aa	aa	aa	aa	aa	aa	aa	aa	aa	aa	aa	aa	aa	aa	aa	aa	aa	aa	aa	aa	aa	aa	aa	bb	ab	ab	aa	ab	aa	bb	aa	aa	ab	ab	aa	aa	ab	bb	bb	bb	bb	bb
A08	157.863	Block8757	aaxbb	aa	ab	aa	aa	aa	aa	aa	aa	aa	aa	aa	aa	aa	aa	aa	aa	aa	aa	aa	aa	aa	aa	aa	aa	aa	aa	aa	bb	ab	ab	aa	ab	aa	bb	aa	aa	ab	ab	aa	aa	ab	bb	bb	bb	bb	bb
A08	157.863	Block8742	aaxbb	aa	ab	aa	aa	aa	aa	aa	aa	aa	aa	aa	aa	aa	aa	aa	aa	aa	aa	aa	aa	aa	aa	aa	aa	aa	aa	aa	bb	ab	ab	aa	ab	aa	bb	aa	aa	ab	ab	aa	aa	ab	bb	bb	bb	bb	bb
A08	157.863	Block8741	aaxbb	aa	ab	aa	aa	aa	aa	aa	aa	aa	aa	aa	aa	aa	aa	aa	aa	aa	aa	aa	aa	aa	aa	aa	aa	aa	aa	aa	bb	ab	ab	aa	ab	aa	bb	aa	aa	ab	ab	aa	aa	ab	bb	bb	bb	bb	bb
A08	157.863	Block8740	aaxbb	aa	ab	aa	aa	aa	aa	aa	aa	aa	aa	aa	aa	aa	aa	aa	aa	aa	aa	aa	aa	aa	aa	aa	aa	aa	aa	aa	bb	ab	ab	aa	ab	aa	bb	aa	aa	ab	ab	aa	aa	ab	bb	bb	bb	bb	bb
A08	157.863	Block8748	aaxbb	aa	ab	aa	aa	aa	aa	aa	aa	aa	aa	aa	aa	aa	aa	aa	aa	aa	aa	aa	aa	aa	aa	aa	aa	aa	aa	aa	bb	ab	ab	aa	ab	aa	bb	aa	aa	ab	ab	aa	aa	ab	bb	bb	bb	bb	bb
A08	157.863	Block8750	aaxbb	aa	ab	aa	aa	aa	aa	aa	aa	aa	aa	aa	aa	aa	aa	aa	aa	aa	aa	aa	aa	aa	aa	aa	aa	aa	aa	aa	bb	ab	ab	aa	ab	aa	bb	aa	aa	ab	ab	aa	aa	ab	bb	bb	bb	bb	bb
A08	157.863	Block8751	aaxbb	aa	ab	aa	aa	aa	aa	aa	aa	aa	aa	aa	aa	aa	aa	aa	aa	aa	aa	aa	aa	aa	aa	aa	aa	aa	aa	aa	bb	ab	ab	aa	ab	aa	bb	aa	aa	ab	ab	aa	aa	ab	bb	bb	bb	bb	bb
A08	157.863	Block8752	aaxbb	aa	ab	aa	aa	aa	aa	aa	aa	aa	aa	aa	aa	aa	aa	aa	aa	aa	aa	aa	aa	aa	aa	aa	aa	aa	aa	aa	bb	ab	ab	aa	ab	aa	bb	aa	aa	ab	ab	aa	aa	ab	bb	bb	bb	bb	bb
A08	157.863	Block8753	aaxbb	aa	ab	aa	aa	aa	aa	aa	aa	aa	aa	aa	aa	aa	aa	aa	aa	aa	aa	aa	aa	aa	aa	aa	aa	aa	aa	aa	bb	ab	ab	aa	ab	aa	bb	aa	aa	ab	ab	aa	aa	ab	bb	bb	bb	bb	bb
A08	157.863	Block8744	aaxbb	aa	ab	aa	aa	aa	aa	aa	aa	aa	aa	aa	aa	aa	aa	aa	aa	aa	aa	aa	aa	aa	aa	aa	aa	aa	aa	aa	bb	ab	ab	aa	ab	aa	bb	aa	aa	ab	ab	aa	aa	ab	bb	bb	bb	bb	bb
A08	157.863	Block8746	aaxbb	aa	ab	aa	aa	aa	aa	aa	aa	aa	aa	aa	aa	aa	aa	aa	aa	aa	aa	aa	aa	aa	aa	aa	aa	aa	aa	aa	bb	ab	ab	aa	ab	aa	bb	aa	aa	ab	ab	aa	aa	ab	bb	bb	bb	bb	bb
A08	157.863	Block8739	aaxbb	aa	ab	aa	aa	aa	aa	aa	aa	aa	aa	aa	aa	aa	aa	aa	aa	aa	aa	aa	aa	aa	aa	aa	aa	aa	aa	aa	bb	ab	ab	aa	ab	aa	bb	aa	aa	ab	ab	aa	aa	ab	bb	bb	bb	bb	bb
A08	157.863	Block8776	aaxbb	aa	ab	aa	aa	aa	aa	aa	aa	aa	aa	aa	aa	aa	aa	aa	aa	aa	aa	aa	aa	aa	aa	aa	aa	aa	aa	aa	bb	ab	ab	aa	ab	aa	bb	aa	aa	ab	ab	aa	aa	ab	bb	bb	bb	bb	bb
A08	158.113	Block8766	aaxbb	aa	ab	aa	aa	aa	aa	aa	aa	aa	aa	aa	aa	aa	aa	aa	aa	aa	aa	aa	aa	aa	aa	aa	aa	aa	aa	aa	bb	ab	ab	aa	ab	aa	bb	aa	aa	ab	ab	aa	aa	ab	bb	bb	bb	bb	bb
A08	158.113	Block8765	aaxbb	aa	ab	aa	aa	aa	aa	aa	aa	aa	aa	aa	aa	aa	aa	aa	aa	aa	aa	aa	aa	aa	aa	aa	aa	aa	aa	aa	bb	ab	ab	aa	ab	aa	bb	aa	aa	ab	ab	aa	aa	ab	bb	bb	bb	bb	bb
A08	158.113	Block8764	aaxbb	aa	ab	aa	aa	aa	aa	aa	aa	aa	aa	aa	aa	aa	aa	aa	aa	aa	aa	aa	aa	aa	aa	aa	aa	aa	aa	aa	bb	ab	ab	aa	ab	aa	bb	aa	aa	ab	ab	aa	aa	ab	bb	bb	bb	bb	bb
A08	158.113	Block8777	aaxbb	aa	ab	aa	aa	aa	aa	aa	aa	aa	aa	aa	aa	aa	aa	aa	aa	aa	aa	aa	aa	aa	aa	aa	aa	aa	aa	aa	bb	ab	ab	aa	ab	aa	bb	aa	aa	ab	ab	aa	aa	ab	bb	bb	bb	bb	bb
A08	158.113	Block8763	aaxbb	aa	ab	aa	aa	aa	aa	aa	aa	aa	aa	aa	aa	aa	aa	aa	aa	aa	aa	aa	aa	aa	aa	aa	aa	aa	aa	aa	bb	ab	ab	aa	ab	aa	bb	aa	aa	ab	ab	aa	aa	ab	bb	bb	bb	bb	bb
A08	158.113	Block8755	aaxbb	aa	ab	aa	aa	aa	aa	aa	aa	aa	aa	aa	aa	aa	aa	aa	aa	aa	aa	aa	aa	aa	aa	aa	aa	aa	aa	aa	bb	ab	ab	aa	ab	aa	bb	aa	aa	ab	ab	aa	aa	ab	bb	bb	bb	bb	bb
A08	158.113	Block8756	aaxbb	aa	ab	aa	aa	aa	aa	aa	aa	aa	aa	aa	aa	aa	aa	aa	aa	aa	aa	aa	aa	aa	aa	aa	aa	aa	aa	aa	bb	ab	ab	aa	ab	aa	bb	aa	aa	ab	ab	aa	aa	ab	bb	bb	bb	bb	bb
A08	158.113	Block8754	aaxbb	aa	ab	aa	aa	aa	aa	aa	aa	aa	aa	aa	aa	aa	aa	aa	aa	aa	aa	aa	aa	aa	aa	aa	aa	aa	aa	aa	bb	ab	ab	aa	ab	aa	bb	aa	aa	ab	ab	aa	aa	ab	bb	bb	bb	bb	bb
A08	158.113	Block8780	aaxbb	aa	ab	aa	aa	aa	aa	aa	aa	aa	aa	aa	aa	aa	aa	aa	aa	aa	aa	aa	aa	aa	aa	aa	aa	aa	aa	aa	bb	ab	ab	aa	ab	aa	bb	aa	aa	ab	ab	aa	aa	ab	bb	bb	bb	bb	bb
A08	158.113	Block8769	aaxbb	aa	ab	aa	aa	aa	aa	aa	aa	aa	aa	aa	aa	aa	aa	aa	aa	aa	aa	aa	aa	aa	aa	aa	aa	aa	aa	aa	bb	ab	ab	aa	ab	aa	bb	aa	aa	ab	ab	aa	aa	ab	bb	bb	bb	bb	bb
A08	158.113	Block8768	aaxbb	aa	ab	aa	aa	aa	aa	aa	aa	aa	aa	aa	aa	aa	aa	aa	aa	aa	aa	aa	aa	aa	aa	aa	aa	aa	aa	aa	bb	ab	ab	aa	ab	aa	bb	aa	aa	ab	ab	aa	aa	ab	bb	bb	bb	bb	bb
A09	0	Block8919	aaxbb	aa	ab	aa	bb	bb	bb	bb	aa	aa	ab	aa	ab	ab	ab	ab	aa	aa	bb	ab	ab	bb	bb	ab	aa	bb	aa	bb	ab	bb	ab	ab	ab	bb	aa	ab	bb	ab	bb	ab	ab	ab	bb	ab	ab	ab	ab
A09	0	Block8917	aaxbb	aa	ab	aa	bb	bb	bb	bb	aa	aa	ab	aa	ab	ab	ab	ab	aa	aa	bb	ab	ab	bb	bb	ab	aa	bb	aa	bb	ab	bb	ab	ab	ab	bb	aa	ab	bb	ab	bb	ab	ab	ab	bb	ab	ab	ab	ab
A09	0.25	Block8929	aaxbb	aa	ab	aa	bb	bb	bb	bb	aa	aa	ab	aa	ab	ab	ab	ab	aa	aa	bb	ab	ab	bb	ab	ab	aa	bb	aa	bb	ab	bb	ab	ab	ab	bb	aa	ab	bb	ab	bb	ab	ab	ab	bb	ab	ab	ab	ab
A09	1.5	Block9170	aaxbb	aa	ab	aa	bb	bb	bb	bb	aa	aa	ab	aa	ab	ab	aa	ab	aa	aa	bb	ab	ab	bb	ab	ab	aa	bb	aa	bb	ab	bb	ab	ab	ab	bb	aa	ab	bb	ab	bb	ab	ab	ab	bb	ab	ab	ab	ab
A09	1.5	Block9168	aaxbb	aa	ab	aa	bb	bb	bb	bb	aa	aa	ab	aa	ab	ab	aa	ab	aa	aa	bb	ab	ab	bb	ab	ab	aa	bb	aa	bb	ab	bb	ab	ab	ab	bb	aa	ab	bb	ab	bb	ab	ab	ab	bb	ab	ab	ab	ab
A09	1.75	Block9169	aaxbb	aa	ab	aa	bb	bb	bb	bb	aa	aa	ab	aa	ab	ab	aa	ab	aa	aa	bb	ab	ab	bb	ab	ab	aa	bb	aa	bb	ab	bb	ab	ab	ab	bb	aa	ab	bb	ab	bb	ab	ab	ab	bb	ab	ab	ab	ab
A09	1.75	Block9167	aaxbb	aa	ab	aa	bb	bb	bb	bb	aa	aa	ab	aa	ab	ab	aa	ab	aa	aa	bb	ab	ab	bb	ab	ab	aa	bb	aa	bb	ab	bb	ab	ab	ab	bb	aa	ab	bb	ab	bb	ab	ab	ab	bb	ab	ab	ab	ab
A09	2	Block9191	aaxbb	aa	ab	aa	bb	bb	bb	bb	aa	aa	ab	aa	ab	ab	aa	ab	aa	aa	bb	ab	ab	bb	ab	ab	aa	bb	aa	bb	ab	bb	ab	ab	ab	bb	aa	ab	bb	ab	bb	ab	ab	ab	bb	ab	ab	ab	ab
A09	2	Block9179	aaxbb	aa	ab	aa	bb	bb	bb	bb	aa	aa	ab	aa	ab	ab	aa	ab	aa	aa	bb	ab	ab	bb	ab	ab	aa	bb	aa	bb	ab	bb	ab	ab	ab	bb	aa	ab	bb	ab	bb	ab	ab	ab	bb	ab	ab	ab	ab
A09	2	Block9178	aaxbb	aa	ab	aa	bb	bb	bb	bb	aa	aa	ab	aa	ab	ab	aa	ab	aa	aa	bb	ab	ab	bb	ab	ab	aa	bb	aa	bb	ab	bb	ab	ab	ab	bb	aa	ab	bb	ab	bb	ab	ab	ab	bb	ab	ab	ab	ab
A09	2.25	Block9204	aaxbb	aa	ab	aa	bb	bb	bb	bb	aa	aa	ab	aa	ab	ab	aa	ab	aa	aa	bb	ab	ab	bb	ab	ab	aa	bb	aa	bb	ab	bb	ab	ab	ab	bb	aa	ab	bb	ab	bb	ab	ab	ab	bb	ab	ab	ab	ab
A09	2.25	Block9200	aaxbb	aa	ab	aa	bb	bb	bb	bb	aa	aa	ab	aa	ab	ab	aa	ab	aa	aa	bb	ab	ab	bb	ab	ab	aa	bb	aa	bb	ab	bb	ab	ab	ab	bb	aa	ab	bb	ab	bb	ab	ab	ab	bb	ab	ab	ab	ab
A09	2.25	Block9198	aaxbb	aa	ab	aa	bb	bb	bb	bb	aa	aa	ab	aa	ab	ab	aa	ab	aa	aa	bb	ab	ab	bb	ab	ab	aa	bb	aa	bb	ab	bb	ab	ab	ab	bb	aa	ab	bb	ab	bb	ab	ab	ab	bb	ab	ab	ab	ab
A09	2.25	Block9196	aaxbb	aa	ab	aa	bb	bb	bb	bb	aa	aa	ab	aa	ab	ab	aa	ab	aa	aa	bb	ab	ab	bb	ab	ab	aa	bb	aa	bb	ab	bb	ab	ab	ab	bb	aa	ab	bb	ab	bb	ab	ab	ab	bb	ab	ab	ab	ab
A09	2.25	Block9192	aaxbb	aa	ab	aa	bb	bb	bb	bb	aa	aa	ab	aa	ab	ab	aa	ab	aa	aa	bb	ab	ab	bb	ab	ab	aa	bb	aa	bb	ab	bb	ab	ab	ab	bb	aa	ab	bb	ab	bb	ab	ab	ab	bb	ab	ab	ab	ab
A09	2.25	Block9190	aaxbb	aa	ab	aa	bb	bb	bb	bb	aa	aa	ab	aa	ab	ab	aa	ab	aa	aa	bb	ab	ab	bb	ab	ab	aa	bb	aa	bb	ab	bb	ab	ab	ab	bb	aa	ab	bb	ab	bb	ab	ab	ab	bb	ab	ab	ab	ab
A09	2.25	Block9181	aaxbb	aa	ab	aa	bb	bb	bb	bb	aa	aa	ab	aa	ab	ab	aa	ab	aa	aa	bb	ab	ab	bb	ab	ab	aa	bb	aa	bb	ab	bb	ab	ab	ab	bb	aa	ab	bb	ab	bb	ab	ab	ab	bb	ab	ab	ab	ab
A09	2.25	Block9177	aaxbb	aa	ab	aa	bb	bb	bb	bb	aa	aa	ab	aa	ab	ab	aa	ab	aa	aa	bb	ab	ab	bb	ab	ab	aa	bb	aa	bb	ab	bb	ab	ab	ab	bb	aa	ab	bb	ab	bb	ab	ab	ab	bb	ab	ab	ab	ab
A09	2.25	Block9175	aaxbb	aa	ab	aa	bb	bb	bb	bb	aa	aa	ab	aa	ab	ab	aa	ab	aa	aa	bb	ab	ab	bb	ab	ab	aa	bb	aa	bb	ab	bb	ab	ab	ab	bb	aa	ab	bb	ab	bb	ab	ab	ab	bb	ab	ab	ab	ab
A09	2.5	Block9214	aaxbb	aa	ab	aa	bb	bb	bb	bb	aa	aa	ab	aa	ab	ab	aa	ab	aa	aa	bb	ab	ab	bb	ab	ab	aa	bb	aa	bb	ab	bb	ab	ab	ab	bb	aa	ab	bb	ab	bb	ab	ab	ab	bb	ab	ab	ab	ab
A09	2.5	Block9203	aaxbb	aa	ab	aa	bb	bb	bb	bb	aa	aa	ab	aa	ab	ab	aa	ab	aa	aa	bb	ab	ab	bb	ab	ab	aa	bb	aa	bb	ab	bb	ab	ab	ab	bb	aa	ab	bb	ab	bb	ab	ab	ab	bb	ab	ab	ab	ab
A09	2.5	Block9201	aaxbb	aa	ab	aa	bb	bb	bb	bb	aa	aa	ab	aa	ab	ab	aa	ab	aa	aa	bb	ab	ab	bb	ab	ab	aa	bb	aa	bb	ab	bb	ab	ab	ab	bb	aa	ab	bb	ab	bb	ab	ab	ab	bb	ab	ab	ab	ab
A09	3.25	Block9243	aaxbb	aa	ab	aa	bb	bb	bb	bb	aa	aa	ab	aa	ab	ab	aa	ab	aa	aa	bb	ab	ab	bb	ab	ab	aa	bb	aa	bb	ab	bb	ab	ab	ab	bb	aa	ab	bb	ab	bb	ab	ab	ab	bb	ab	ab	ab	ab
A09	3.25	Block9241	aaxbb	aa	ab	aa	bb	bb	bb	bb	aa	aa	ab	aa	ab	ab	aa	ab	aa	aa	bb	ab	ab	bb	ab	ab	aa	bb	aa	bb	ab	bb	ab	ab	ab	bb	aa	ab	bb	ab	bb	ab	ab	ab	bb	ab	ab	ab	ab
A09	3.25	Block9239	aaxbb	aa	ab	aa	bb	bb	bb	bb	aa	aa	ab	aa	ab	ab	aa	ab	aa	aa	bb	ab	ab	bb	ab	ab	aa	bb	aa	bb	ab	bb	ab	ab	ab	bb	aa	ab	bb	ab	bb	ab	ab	ab	bb	ab	ab	ab	ab
A09	3.25	Block9237	aaxbb	aa	ab	aa	bb	bb	bb	bb	aa	aa	ab	aa	ab	ab	aa	ab	aa	aa	bb	ab	ab	bb	ab	ab	aa	bb	aa	bb	ab	bb	ab	ab	ab	bb	aa	ab	bb	ab	bb	ab	ab	ab	bb	ab	ab	ab	ab
A09	3.25	Block9236	aaxbb	aa	ab	aa	bb	bb	bb	bb	aa	aa	ab	aa	ab	ab	aa	ab	aa	aa	bb	ab	ab	bb	ab	ab	aa	bb	aa	bb	ab	bb	ab	ab	ab	bb	aa	ab	bb	ab	bb	ab	ab	ab	bb	ab	ab	ab	ab
A09	3.25	Block9235	aaxbb	aa	ab	aa	bb	bb	bb	bb	aa	aa	ab	aa	ab	ab	aa	ab	aa	aa	bb	ab	ab	bb	ab	ab	aa	bb	aa	bb	ab	bb	ab	ab	ab	bb	aa	ab	bb	ab	bb	ab	ab	ab	bb	ab	ab	ab	ab
A09	3.25	Block9233	aaxbb	aa	ab	aa	bb	bb	bb	bb	aa	aa	ab	aa	ab	ab	aa	ab	aa	aa	bb	ab	ab	bb	ab	ab	aa	bb	aa	bb	ab	bb	ab	ab	ab	bb	aa	ab	bb	ab	bb	ab	ab	ab	bb	ab	ab	ab	ab
A09	3.25	Block9232	aaxbb	aa	ab	aa	bb	bb	bb	bb	aa	aa	ab	aa	ab	ab	aa	ab	aa	aa	bb	ab	ab	bb	ab	ab	aa	bb	aa	bb	ab	bb	ab	ab	ab	bb	aa	ab	bb	ab	bb	ab	ab	ab	bb	ab	ab	ab	ab
A09	3.25	Block9231	aaxbb	aa	ab	aa	bb	bb	bb	bb	aa	aa	ab	aa	ab	ab	aa	ab	aa	aa	bb	ab	ab	bb	ab	ab	aa	bb	aa	bb	ab	bb	ab	ab	ab	bb	aa	ab	bb	ab	bb	ab	ab	ab	bb	ab	ab	ab	ab
A09	3.25	Block9229	aaxbb	aa	ab	aa	bb	bb	bb	bb	aa	aa	ab	aa	ab	ab	aa	ab	aa	aa	bb	ab	ab	bb	ab	ab	aa	bb	aa	bb	ab	bb	ab	ab	ab	bb	aa	ab	bb	ab	bb	ab	ab	ab	bb	ab	ab	ab	ab
A09	3.25	Block9226	aaxbb	aa	ab	aa	bb	bb	bb	bb	aa	aa	ab	aa	ab	ab	aa	ab	aa	aa	bb	ab	ab	bb	ab	ab	aa	bb	aa	bb	ab	bb	ab	ab	ab	bb	aa	ab	bb	ab	bb	ab	ab	ab	bb	ab	ab	ab	ab
A09	3.25	Block9224	aaxbb	aa	ab	aa	bb	bb	bb	bb	aa	aa	ab	aa	ab	ab	aa	ab	aa	aa	bb	ab	ab	bb	ab	ab	aa	bb	aa	bb	ab	bb	ab	ab	ab	bb	aa	ab	bb	ab	bb	ab	ab	ab	bb	ab	ab	ab	ab
A09	3.25	Block9221	aaxbb	aa	ab	aa	bb	bb	bb	bb	aa	aa	ab	aa	ab	ab	aa	ab	aa	aa	bb	ab	ab	bb	ab	ab	aa	bb	aa	bb	ab	bb	ab	ab	ab	bb	aa	ab	bb	ab	bb	ab	ab	ab	bb	ab	ab	ab	ab
A09	3.25	Block9220	aaxbb	aa	ab	aa	bb	bb	bb	bb	aa	aa	ab	aa	ab	ab	aa	ab	aa	aa	bb	ab	ab	bb	ab	ab	aa	bb	aa	bb	ab	bb	ab	ab	ab	bb	aa	ab	bb	ab	bb	ab	ab	ab	bb	ab	ab	ab	ab
A09	3.25	Block9216	aaxbb	aa	ab	aa	bb	bb	bb	bb	aa	aa	ab	aa	ab	ab	aa	ab	aa	aa	bb	ab	ab	bb	ab	ab	aa	bb	aa	bb	ab	bb	ab	ab	ab	bb	aa	ab	bb	ab	bb	ab	ab	ab	bb	ab	ab	ab	ab
A09	3.5	Block9225	aaxbb	aa	ab	aa	bb	bb	bb	bb	aa	aa	ab	aa	ab	ab	aa	ab	aa	aa	bb	ab	ab	bb	ab	ab	aa	bb	aa	bb	ab	bb	ab	ab	ab	bb	aa	ab	bb	ab	bb	ab	ab	ab	bb	ab	ab	ab	ab
A09	3.5	Block9219	aaxbb	aa	ab	aa	bb	bb	bb	bb	aa	aa	ab	aa	ab	ab	aa	ab	aa	aa	bb	ab	ab	bb	ab	ab	aa	bb	aa	bb	ab	bb	ab	ab	ab	bb	aa	ab	bb	ab	bb	ab	ab	ab	bb	ab	ab	ab	ab
A09	4	Block9242	aaxbb	aa	ab	aa	bb	bb	bb	bb	aa	aa	ab	aa	ab	ab	aa	ab	aa	aa	bb	ab	ab	bb	ab	ab	aa	bb	aa	bb	ab	bb	ab	ab	ab	bb	aa	ab	bb	ab	bb	ab	ab	ab	bb	ab	ab	ab	ab
A09	4.25	Block9246	aaxbb	aa	ab	aa	bb	bb	bb	bb	aa	aa	ab	aa	ab	ab	aa	ab	aa	aa	bb	ab	ab	bb	ab	ab	aa	bb	aa	bb	ab	bb	ab	ab	ab	bb	aa	ab	bb	ab	bb	ab	ab	ab	bb	ab	ab	ab	ab
A09	4.5	Block9254	aaxbb	aa	ab	aa	bb	bb	bb	bb	aa	aa	ab	aa	ab	ab	aa	ab	aa	aa	bb	ab	ab	bb	ab	ab	aa	bb	aa	bb	ab	bb	ab	ab	ab	bb	aa	ab	bb	ab	bb	ab	ab	ab	bb	ab	ab	ab	ab
A09	4.5	Block9248	aaxbb	aa	ab	aa	bb	bb	bb	bb	aa	aa	ab	aa	ab	ab	aa	ab	aa	aa	bb	ab	ab	bb	ab	ab	aa	bb	aa	bb	ab	bb	ab	ab	ab	bb	aa	ab	bb	ab	bb	ab	ab	ab	bb	ab	ab	ab	ab
A09	4.5	Block9244	aaxbb	aa	ab	aa	bb	bb	bb	bb	aa	aa	ab	aa	ab	ab	aa	ab	aa	aa	bb	ab	ab	bb	ab	ab	aa	bb	aa	bb	ab	bb	ab	ab	ab	bb	aa	ab	bb	ab	bb	ab	ab	ab	bb	ab	ab	ab	ab
A09	4.75	Block9253	aaxbb	aa	ab	aa	bb	bb	bb	bb	aa	aa	ab	aa	ab	ab	aa	ab	aa	aa	bb	ab	ab	bb	ab	ab	aa	bb	aa	bb	ab	bb	ab	ab	ab	bb	aa	ab	bb	ab	bb	ab	ab	ab	bb	ab	ab	ab	ab
A09	4.75	Block9249	aaxbb	aa	ab	aa	bb	bb	bb	bb	aa	aa	ab	aa	ab	ab	aa	ab	aa	aa	bb	ab	ab	bb	ab	ab	aa	bb	aa	bb	ab	bb	ab	ab	ab	bb	aa	ab	bb	ab	bb	ab	ab	ab	bb	ab	ab	ab	ab
A09	5.25	Block9255	aaxbb	aa	ab	aa	bb	bb	bb	bb	aa	aa	ab	aa	ab	ab	aa	ab	aa	aa	bb	ab	ab	bb	ab	ab	aa	bb	aa	bb	ab	bb	ab	ab	ab	bb	aa	ab	bb	ab	ab	ab	ab	ab	bb	ab	ab	ab	ab
A09	5.5	Block9256	aaxbb	aa	ab	aa	bb	bb	bb	bb	aa	aa	ab	aa	ab	ab	aa	ab	aa	aa	bb	ab	ab	bb	ab	ab	aa	bb	aa	bb	ab	bb	ab	ab	ab	bb	aa	ab	bb	ab	ab	ab	ab	ab	bb	ab	ab	ab	ab
A09	5.75	Block9419	aaxbb	aa	ab	aa	bb	bb	bb	bb	aa	aa	ab	aa	ab	ab	aa	ab	aa	aa	bb	ab	ab	bb	ab	ab	aa	bb	ab	bb	ab	bb	ab	ab	ab	bb	aa	ab	bb	ab	ab	ab	ab	ab	bb	ab	ab	ab	ab
A09	5.75	Block9417	aaxbb	aa	ab	aa	bb	bb	bb	bb	aa	aa	ab	aa	ab	ab	aa	ab	aa	aa	bb	ab	ab	bb	ab	ab	aa	bb	ab	bb	ab	bb	ab	ab	ab	bb	aa	ab	bb	ab	ab	ab	ab	ab	bb	ab	ab	ab	ab
A09	5.75	Block9413	aaxbb	aa	ab	aa	bb	bb	bb	bb	aa	aa	ab	aa	ab	ab	aa	ab	aa	aa	bb	ab	ab	bb	ab	ab	aa	bb	ab	bb	ab	bb	ab	ab	ab	bb	aa	ab	bb	ab	ab	ab	ab	ab	bb	ab	ab	ab	ab
A09	5.75	Block9409	aaxbb	aa	ab	aa	bb	bb	bb	bb	aa	aa	ab	aa	ab	ab	aa	ab	aa	aa	bb	ab	ab	bb	ab	ab	aa	bb	ab	bb	ab	bb	ab	ab	ab	bb	aa	ab	bb	ab	ab	ab	ab	ab	bb	ab	ab	ab	ab
A09	5.75	Block9401	aaxbb	aa	ab	aa	bb	bb	bb	bb	aa	aa	ab	aa	ab	ab	aa	ab	aa	aa	bb	ab	ab	bb	ab	ab	aa	bb	ab	bb	ab	bb	ab	ab	ab	bb	aa	ab	bb	ab	ab	ab	ab	ab	bb	ab	ab	ab	ab
A09	5.75	Block9382	aaxbb	aa	ab	aa	bb	bb	bb	bb	aa	aa	ab	aa	ab	ab	aa	ab	aa	aa	bb	ab	ab	bb	ab	ab	aa	bb	ab	bb	ab	bb	ab	ab	ab	bb	aa	ab	bb	ab	ab	ab	ab	ab	bb	ab	ab	ab	ab
A09	5.75	Block9353	aaxbb	aa	ab	aa	bb	bb	bb	bb	aa	aa	ab	aa	ab	ab	aa	ab	aa	aa	bb	ab	ab	bb	ab	ab	aa	bb	ab	bb	ab	bb	ab	ab	ab	bb	aa	ab	bb	ab	ab	ab	ab	ab	bb	ab	ab	ab	ab
A09	5.75	Block9351	aaxbb	aa	ab	aa	bb	bb	bb	bb	aa	aa	ab	aa	ab	ab	aa	ab	aa	aa	bb	ab	ab	bb	ab	ab	aa	bb	ab	bb	ab	bb	ab	ab	ab	bb	aa	ab	bb	ab	ab	ab	ab	ab	bb	ab	ab	ab	ab
A09	5.75	Block9347	aaxbb	aa	ab	aa	bb	bb	bb	bb	aa	aa	ab	aa	ab	ab	aa	ab	aa	aa	bb	ab	ab	bb	ab	ab	aa	bb	ab	bb	ab	bb	ab	ab	ab	bb	aa	ab	bb	ab	ab	ab	ab	ab	bb	ab	ab	ab	ab
A09	5.75	Block9317	aaxbb	aa	ab	aa	bb	bb	bb	bb	aa	aa	ab	aa	ab	ab	aa	ab	aa	aa	bb	ab	ab	bb	ab	ab	aa	bb	ab	bb	ab	bb	ab	ab	ab	bb	aa	ab	bb	ab	ab	ab	ab	ab	bb	ab	ab	ab	ab
A09	5.75	Block9313	aaxbb	aa	ab	aa	bb	bb	bb	bb	aa	aa	ab	aa	ab	ab	aa	ab	aa	aa	bb	ab	ab	bb	ab	ab	aa	bb	ab	bb	ab	bb	ab	ab	ab	bb	aa	ab	bb	ab	ab	ab	ab	ab	bb	ab	ab	ab	ab
A09	5.75	Block9294	aaxbb	aa	ab	aa	bb	bb	bb	bb	aa	aa	ab	aa	ab	ab	aa	ab	aa	aa	bb	ab	ab	bb	ab	ab	aa	bb	ab	bb	ab	bb	ab	ab	ab	bb	aa	ab	bb	ab	ab	ab	ab	ab	bb	ab	ab	ab	ab
A09	5.75	Block9279	aaxbb	aa	ab	aa	bb	bb	bb	bb	aa	aa	ab	aa	ab	ab	aa	ab	aa	aa	bb	ab	ab	bb	ab	ab	aa	bb	ab	bb	ab	bb	ab	ab	ab	bb	aa	ab	bb	ab	ab	ab	ab	ab	bb	ab	ab	ab	ab
A09	5.75	Block9273	aaxbb	aa	ab	aa	bb	bb	bb	bb	aa	aa	ab	aa	ab	ab	aa	ab	aa	aa	bb	ab	ab	bb	ab	ab	aa	bb	ab	bb	ab	bb	ab	ab	ab	bb	aa	ab	bb	ab	ab	ab	ab	ab	bb	ab	ab	ab	ab
A09	5.75	Block9269	aaxbb	aa	ab	aa	bb	bb	bb	bb	aa	aa	ab	aa	ab	ab	aa	ab	aa	aa	bb	ab	ab	bb	ab	ab	aa	bb	ab	bb	ab	bb	ab	ab	ab	bb	aa	ab	bb	ab	ab	ab	ab	ab	bb	ab	ab	ab	ab
A09	5.75	Block9263	aaxbb	aa	ab	aa	bb	bb	bb	bb	aa	aa	ab	aa	ab	ab	aa	ab	aa	aa	bb	ab	ab	bb	ab	ab	aa	bb	ab	bb	ab	bb	ab	ab	ab	bb	aa	ab	bb	ab	ab	ab	ab	ab	bb	ab	ab	ab	ab
A09	5.75	Block9261	aaxbb	aa	ab	aa	bb	bb	bb	bb	aa	aa	ab	aa	ab	ab	aa	ab	aa	aa	bb	ab	ab	bb	ab	ab	aa	bb	ab	bb	ab	bb	ab	ab	ab	bb	aa	ab	bb	ab	ab	ab	ab	ab	bb	ab	ab	ab	ab
A09	5.75	Block9257	aaxbb	aa	ab	aa	bb	bb	bb	bb	aa	aa	ab	aa	ab	ab	aa	ab	aa	aa	bb	ab	ab	bb	ab	ab	aa	bb	ab	bb	ab	bb	ab	ab	ab	bb	aa	ab	bb	ab	ab	ab	ab	ab	bb	ab	ab	ab	ab
A09	6	Block9414	aaxbb	aa	ab	aa	bb	bb	bb	bb	aa	aa	ab	aa	ab	ab	aa	ab	aa	aa	bb	ab	ab	bb	ab	ab	aa	bb	ab	bb	ab	bb	ab	ab	ab	bb	aa	ab	bb	ab	ab	ab	ab	ab	bb	ab	ab	ab	ab
A09	6	Block9318	aaxbb	aa	ab	aa	bb	bb	bb	bb	aa	aa	ab	aa	ab	ab	aa	ab	aa	aa	bb	ab	ab	bb	ab	ab	aa	bb	ab	bb	ab	bb	ab	ab	ab	bb	aa	ab	bb	ab	ab	ab	ab	ab	bb	ab	ab	ab	ab
A09	6	Block9316	aaxbb	aa	ab	aa	bb	bb	bb	bb	aa	aa	ab	aa	ab	ab	aa	ab	aa	aa	bb	ab	ab	bb	ab	ab	aa	bb	ab	bb	ab	bb	ab	ab	ab	bb	aa	ab	bb	ab	ab	ab	ab	ab	bb	ab	ab	ab	ab
A09	6	Block9304	aaxbb	aa	ab	aa	bb	bb	bb	bb	aa	aa	ab	aa	ab	ab	aa	ab	aa	aa	bb	ab	ab	bb	ab	ab	aa	bb	ab	bb	ab	bb	ab	ab	ab	bb	aa	ab	bb	ab	ab	ab	ab	ab	bb	ab	ab	ab	ab
A09	6	Block9274	aaxbb	aa	ab	aa	bb	bb	bb	bb	aa	aa	ab	aa	ab	ab	aa	ab	aa	aa	bb	ab	ab	bb	ab	ab	aa	bb	ab	bb	ab	bb	ab	ab	ab	bb	aa	ab	bb	ab	ab	ab	ab	ab	bb	ab	ab	ab	ab
A09	6	Block9272	aaxbb	aa	ab	aa	bb	bb	bb	bb	aa	aa	ab	aa	ab	ab	aa	ab	aa	aa	bb	ab	ab	bb	ab	ab	aa	bb	ab	bb	ab	bb	ab	ab	ab	bb	aa	ab	bb	ab	ab	ab	ab	ab	bb	ab	ab	ab	ab
A09	6	Block9270	aaxbb	aa	ab	aa	bb	bb	bb	bb	aa	aa	ab	aa	ab	ab	aa	ab	aa	aa	bb	ab	ab	bb	ab	ab	aa	bb	ab	bb	ab	bb	ab	ab	ab	bb	aa	ab	bb	ab	ab	ab	ab	ab	bb	ab	ab	ab	ab
A09	6	Block9262	aaxbb	aa	ab	aa	bb	bb	bb	bb	aa	aa	ab	aa	ab	ab	aa	ab	aa	aa	bb	ab	ab	bb	ab	ab	aa	bb	ab	bb	ab	bb	ab	ab	ab	bb	aa	ab	bb	ab	ab	ab	ab	ab	bb	ab	ab	ab	ab
A09	6	Block9260	aaxbb	aa	ab	aa	bb	bb	bb	bb	aa	aa	ab	aa	ab	ab	aa	ab	aa	aa	bb	ab	ab	bb	ab	ab	aa	bb	ab	bb	ab	bb	ab	ab	ab	bb	aa	ab	bb	ab	ab	ab	ab	ab	bb	ab	ab	ab	ab
A09	6.5	Block9418	aaxbb	aa	ab	aa	bb	bb	bb	bb	aa	aa	ab	aa	ab	ab	aa	ab	aa	aa	bb	ab	ab	bb	ab	ab	aa	bb	ab	bb	ab	bb	ab	ab	ab	bb	aa	ab	bb	ab	ab	ab	ab	ab	bb	ab	ab	ab	ab
A09	6.5	Block9416	aaxbb	aa	ab	aa	bb	bb	bb	bb	aa	aa	ab	aa	ab	ab	aa	ab	aa	aa	bb	ab	ab	bb	ab	ab	aa	bb	ab	bb	ab	bb	ab	ab	ab	bb	aa	ab	bb	ab	ab	ab	ab	ab	bb	ab	ab	ab	ab
A09	6.5	Block9398	aaxbb	aa	ab	aa	bb	bb	bb	bb	aa	aa	ab	aa	ab	ab	aa	ab	aa	aa	bb	ab	ab	bb	ab	ab	aa	bb	ab	bb	ab	bb	ab	ab	ab	bb	aa	ab	bb	ab	ab	ab	ab	ab	bb	ab	ab	ab	ab
A09	6.5	Block9392	aaxbb	aa	ab	aa	bb	bb	bb	bb	aa	aa	ab	aa	ab	ab	aa	ab	aa	aa	bb	ab	ab	bb	ab	ab	aa	bb	ab	bb	ab	bb	ab	ab	ab	bb	aa	ab	bb	ab	ab	ab	ab	ab	bb	ab	ab	ab	ab
A09	6.5	Block9387	aaxbb	aa	ab	aa	bb	bb	bb	bb	aa	aa	ab	aa	ab	ab	aa	ab	aa	aa	bb	ab	ab	bb	ab	ab	aa	bb	ab	bb	ab	bb	ab	ab	ab	bb	aa	ab	bb	ab	ab	ab	ab	ab	bb	ab	ab	ab	ab
A09	6.5	Block9384	aaxbb	aa	ab	aa	bb	bb	bb	bb	aa	aa	ab	aa	ab	ab	aa	ab	aa	aa	bb	ab	ab	bb	ab	ab	aa	bb	ab	bb	ab	bb	ab	ab	ab	bb	aa	ab	bb	ab	ab	ab	ab	ab	bb	ab	ab	ab	ab
A09	6.5	Block9352	aaxbb	aa	ab	aa	bb	bb	bb	bb	aa	aa	ab	aa	ab	ab	aa	ab	aa	aa	bb	ab	ab	bb	ab	ab	aa	bb	ab	bb	ab	bb	ab	ab	ab	bb	aa	ab	bb	ab	ab	ab	ab	ab	bb	ab	ab	ab	ab
A09	6.75	Block9405	aaxbb	aa	ab	aa	bb	bb	bb	bb	aa	aa	ab	aa	ab	ab	aa	ab	aa	aa	bb	ab	ab	bb	ab	ab	aa	bb	ab	bb	ab	bb	ab	ab	ab	ab	aa	ab	bb	ab	ab	ab	ab	ab	bb	ab	ab	ab	ab
A09	6.75	Block9399	aaxbb	aa	ab	aa	bb	bb	bb	bb	aa	aa	ab	aa	ab	ab	aa	ab	aa	aa	bb	ab	ab	bb	ab	ab	aa	bb	ab	bb	ab	bb	ab	ab	ab	ab	aa	ab	bb	ab	ab	ab	ab	ab	bb	ab	ab	ab	ab
A09	7	Block9400	aaxbb	aa	ab	aa	bb	bb	bb	bb	aa	aa	ab	aa	ab	ab	aa	ab	aa	aa	bb	ab	ab	bb	ab	ab	aa	bb	ab	bb	ab	bb	ab	ab	ab	ab	aa	ab	bb	ab	ab	ab	ab	ab	bb	ab	ab	ab	ab
A09	7.5	Block9420	aaxbb	aa	ab	aa	bb	bb	bb	bb	aa	aa	ab	aa	ab	ab	aa	ab	aa	aa	bb	ab	ab	bb	ab	ab	aa	bb	ab	bb	ab	bb	ab	ab	ab	bb	aa	ab	bb	ab	ab	ab	ab	ab	bb	ab	ab	ab	ab
A09	7.75	Block9435	aaxbb	aa	ab	aa	bb	bb	bb	bb	aa	aa	ab	aa	ab	ab	aa	ab	aa	aa	bb	ab	ab	bb	ab	ab	aa	bb	ab	bb	ab	bb	ab	ab	ab	bb	aa	ab	bb	ab	ab	ab	ab	ab	bb	ab	ab	ab	ab
A09	7.75	Block9432	aaxbb	aa	ab	aa	bb	bb	bb	bb	aa	aa	ab	aa	ab	ab	aa	ab	aa	aa	bb	ab	ab	bb	ab	ab	aa	bb	ab	bb	ab	bb	ab	ab	ab	bb	aa	ab	bb	ab	ab	ab	ab	ab	bb	ab	ab	ab	ab
A09	7.75	Block9426	aaxbb	aa	ab	aa	bb	bb	bb	bb	aa	aa	ab	aa	ab	ab	aa	ab	aa	aa	bb	ab	ab	bb	ab	ab	aa	bb	ab	bb	ab	bb	ab	ab	ab	bb	aa	ab	bb	ab	ab	ab	ab	ab	bb	ab	ab	ab	ab
A09	7.75	Block9425	aaxbb	aa	ab	aa	bb	bb	bb	bb	aa	aa	ab	aa	ab	ab	aa	ab	aa	aa	bb	ab	ab	bb	ab	ab	aa	bb	ab	bb	ab	bb	ab	ab	ab	bb	aa	ab	bb	ab	ab	ab	ab	ab	bb	ab	ab	ab	ab
A09	7.75	Block9421	aaxbb	aa	ab	aa	bb	bb	bb	bb	aa	aa	ab	aa	ab	ab	aa	ab	aa	aa	bb	ab	ab	bb	ab	ab	aa	bb	ab	bb	ab	bb	ab	ab	ab	bb	aa	ab	bb	ab	ab	ab	ab	ab	bb	ab	ab	ab	ab
A09	8	Block9424	aaxbb	aa	ab	aa	bb	bb	bb	bb	aa	aa	ab	aa	ab	ab	aa	ab	aa	aa	bb	ab	ab	bb	ab	ab	aa	bb	ab	bb	ab	bb	ab	ab	ab	bb	aa	ab	bb	ab	ab	ab	ab	ab	bb	ab	ab	ab	ab
A09	8	Block9422	aaxbb	aa	ab	aa	bb	bb	bb	bb	aa	aa	ab	aa	ab	ab	aa	ab	aa	aa	bb	ab	ab	bb	ab	ab	aa	bb	ab	bb	ab	bb	ab	ab	ab	bb	aa	ab	bb	ab	ab	ab	ab	ab	bb	ab	ab	ab	ab
A09	8.25	Block9439	aaxbb	aa	ab	aa	bb	bb	bb	bb	aa	aa	ab	aa	ab	ab	aa	ab	aa	aa	bb	ab	ab	bb	ab	ab	aa	bb	ab	bb	ab	bb	ab	ab	ab	bb	aa	ab	bb	ab	ab	ab	ab	ab	bb	ab	ab	ab	ab
A09	8.5	Block9448	aaxbb	aa	ab	aa	bb	bb	bb	bb	aa	aa	ab	aa	ab	ab	aa	ab	aa	aa	bb	ab	ab	bb	ab	ab	aa	bb	ab	bb	ab	bb	ab	ab	ab	bb	aa	ab	bb	ab	ab	ab	ab	ab	bb	ab	ab	ab	ab
A09	8.5	Block9442	aaxbb	aa	ab	aa	bb	bb	bb	bb	aa	aa	ab	aa	ab	ab	aa	ab	aa	aa	bb	ab	ab	bb	ab	ab	aa	bb	ab	bb	ab	bb	ab	ab	ab	bb	aa	ab	bb	ab	ab	ab	ab	ab	bb	ab	ab	ab	ab
A09	8.5	Block9438	aaxbb	aa	ab	aa	bb	bb	bb	bb	aa	aa	ab	aa	ab	ab	aa	ab	aa	aa	bb	ab	ab	bb	ab	ab	aa	bb	ab	bb	ab	bb	ab	ab	ab	bb	aa	ab	bb	ab	ab	ab	ab	ab	bb	ab	ab	ab	ab
A09	8.5	Block9437	aaxbb	aa	ab	aa	bb	bb	bb	bb	aa	aa	ab	aa	ab	ab	aa	ab	aa	aa	bb	ab	ab	bb	ab	ab	aa	bb	ab	bb	ab	bb	ab	ab	ab	bb	aa	ab	bb	ab	ab	ab	ab	ab	bb	ab	ab	ab	ab
A09	8.75	Block9449	aaxbb	aa	ab	aa	bb	bb	bb	bb	aa	aa	ab	aa	ab	ab	aa	ab	aa	aa	bb	ab	ab	bb	ab	ab	aa	bb	ab	bb	ab	bb	ab	ab	ab	bb	aa	ab	bb	ab	ab	ab	ab	ab	bb	ab	ab	ab	ab
A09	8.75	Block9444	aaxbb	aa	ab	aa	bb	bb	bb	bb	aa	aa	ab	aa	ab	ab	aa	ab	aa	aa	bb	ab	ab	bb	ab	ab	aa	bb	ab	bb	ab	bb	ab	ab	ab	bb	aa	ab	bb	ab	ab	ab	ab	ab	bb	ab	ab	ab	ab
A09	9.5	Block9451	aaxbb	aa	ab	aa	bb	bb	bb	bb	aa	aa	ab	aa	ab	ab	aa	ab	aa	aa	bb	ab	ab	bb	ab	ab	aa	bb	ab	bb	ab	bb	ab	ab	ab	bb	aa	ab	bb	ab	ab	ab	ab	ab	bb	ab	ab	ab	ab
A09	10.25	Block9453	aaxbb	aa	ab	aa	bb	bb	bb	bb	aa	aa	ab	aa	ab	ab	aa	ab	aa	aa	bb	ab	ab	bb	ab	ab	aa	bb	ab	bb	ab	bb	ab	ab	ab	bb	aa	ab	bb	ab	ab	ab	ab	ab	bb	ab	ab	ab	ab
A09	11.25	Block9457	aaxbb	aa	ab	aa	bb	bb	ab	bb	aa	aa	ab	aa	ab	ab	aa	ab	aa	aa	bb	ab	ab	bb	ab	ab	aa	bb	ab	bb	ab	bb	ab	ab	ab	bb	aa	ab	bb	ab	ab	ab	ab	ab	bb	ab	ab	ab	ab
A09	11.5	Block9458	aaxbb	aa	ab	aa	bb	bb	ab	bb	aa	aa	ab	aa	ab	ab	aa	ab	aa	aa	bb	ab	ab	bb	ab	ab	aa	bb	ab	bb	ab	bb	ab	ab	ab	bb	aa	ab	bb	ab	ab	ab	ab	ab	bb	ab	ab	ab	ab
A09	12.25	Block9461	aaxbb	aa	ab	aa	ab	bb	ab	bb	aa	aa	ab	aa	ab	ab	aa	ab	aa	aa	bb	ab	ab	bb	ab	ab	aa	bb	ab	bb	ab	bb	ab	ab	ab	bb	aa	ab	bb	ab	ab	ab	ab	ab	bb	ab	ab	ab	ab
A09	12.5	Block9462	aaxbb	aa	ab	aa	ab	bb	ab	bb	aa	aa	ab	aa	ab	ab	aa	ab	aa	aa	bb	ab	ab	bb	ab	ab	aa	bb	ab	bb	ab	bb	ab	ab	ab	bb	aa	ab	bb	ab	ab	ab	ab	ab	bb	ab	ab	ab	ab
A09	13.25	Block9463	aaxbb	aa	ab	aa	ab	bb	ab	bb	aa	aa	ab	aa	ab	ab	aa	ab	aa	aa	bb	ab	ab	bb	ab	ab	aa	bb	ab	bb	ab	bb	ab	ab	ab	bb	aa	ab	bb	ab	ab	ab	ab	aa	bb	ab	ab	ab	ab
A09	14	Block9464	aaxbb	aa	ab	aa	ab	bb	ab	bb	aa	aa	ab	aa	ab	ab	aa	ab	aa	aa	bb	ab	ab	bb	ab	ab	aa	bb	ab	bb	ab	bb	ab	ab	ab	bb	aa	ab	bb	ab	ab	ab	ab	aa	bb	ab	ab	ab	ab
A09	14.25	Block9465	aaxbb	aa	ab	aa	ab	bb	ab	bb	aa	aa	ab	aa	ab	ab	aa	ab	aa	aa	bb	ab	ab	bb	ab	ab	aa	bb	ab	bb	ab	bb	ab	ab	ab	bb	aa	ab	bb	ab	ab	ab	ab	aa	bb	ab	ab	ab	ab
A09	14.75	Block9466	aaxbb	aa	ab	aa	ab	bb	ab	bb	aa	aa	ab	aa	ab	ab	aa	ab	aa	aa	bb	ab	ab	bb	ab	ab	aa	bb	ab	bb	ab	bb	ab	ab	ab	bb	aa	ab	bb	ab	ab	ab	ab	aa	bb	ab	ab	ab	ab
A09	15	Block9467	aaxbb	aa	ab	aa	ab	bb	ab	bb	aa	aa	ab	aa	ab	ab	aa	ab	aa	aa	bb	ab	ab	bb	ab	ab	aa	bb	bb	bb	ab	bb	ab	ab	ab	bb	aa	ab	bb	ab	ab	ab	ab	aa	bb	ab	ab	ab	ab
A09	15.5	Block9468	aaxbb	aa	ab	aa	ab	bb	ab	bb	aa	aa	ab	aa	ab	ab	aa	ab	aa	aa	bb	ab	ab	bb	ab	ab	aa	bb	bb	bb	ab	bb	ab	ab	ab	bb	aa	ab	bb	ab	ab	ab	ab	aa	bb	ab	ab	ab	ab
A09	15.75	Block9473	aaxbb	aa	ab	aa	ab	bb	ab	bb	aa	aa	ab	aa	ab	ab	aa	ab	aa	aa	bb	ab	ab	bb	ab	ab	aa	bb	bb	bb	ab	bb	ab	ab	ab	bb	aa	ab	bb	ab	ab	ab	ab	aa	bb	ab	ab	ab	ab
A09	15.75	Block9469	aaxbb	aa	ab	aa	ab	bb	ab	bb	aa	aa	ab	aa	ab	ab	aa	ab	aa	aa	bb	ab	ab	bb	ab	ab	aa	bb	bb	bb	ab	bb	ab	ab	ab	bb	aa	ab	bb	ab	ab	ab	ab	aa	bb	ab	ab	ab	ab
A09	16.25	Block9475	aaxbb	aa	ab	aa	ab	bb	ab	bb	aa	aa	ab	aa	ab	ab	aa	ab	aa	aa	bb	ab	ab	bb	ab	ab	aa	bb	bb	bb	ab	bb	ab	ab	ab	bb	aa	ab	bb	ab	ab	ab	ab	aa	bb	ab	ab	ab	ab
A09	16.5	Block9478	aaxbb	aa	ab	aa	ab	bb	ab	bb	aa	aa	ab	aa	ab	ab	aa	ab	aa	aa	bb	ab	ab	bb	ab	ab	aa	bb	bb	bb	ab	bb	ab	ab	ab	bb	aa	ab	bb	ab	ab	ab	ab	aa	bb	ab	ab	ab	ab
A09	16.5	Block9476	aaxbb	aa	ab	aa	ab	bb	ab	bb	aa	aa	ab	aa	ab	ab	aa	ab	aa	aa	bb	ab	ab	bb	ab	ab	aa	bb	bb	bb	ab	bb	ab	ab	ab	bb	aa	ab	bb	ab	ab	ab	ab	aa	bb	ab	ab	ab	ab
A09	17	Block9506	aaxbb	aa	ab	aa	ab	bb	ab	bb	aa	ab	ab	aa	ab	ab	ab	ab	aa	aa	bb	ab	ab	bb	ab	ab	aa	bb	bb	bb	ab	bb	ab	ab	ab	bb	aa	ab	bb	ab	ab	ab	ab	aa	bb	ab	ab	ab	ab
A09	17	Block9505	aaxbb	aa	ab	aa	ab	bb	ab	bb	aa	ab	ab	aa	ab	ab	ab	ab	aa	aa	bb	ab	ab	bb	ab	ab	aa	bb	bb	bb	ab	bb	ab	ab	ab	bb	aa	ab	bb	ab	ab	ab	ab	aa	bb	ab	ab	ab	ab
A09	17	Block9504	aaxbb	aa	ab	aa	ab	bb	ab	bb	aa	ab	ab	aa	ab	ab	ab	ab	aa	aa	bb	ab	ab	bb	ab	ab	aa	bb	bb	bb	ab	bb	ab	ab	ab	bb	aa	ab	bb	ab	ab	ab	ab	aa	bb	ab	ab	ab	ab
A09	17.5	Block9493	aaxbb	aa	ab	aa	ab	bb	ab	bb	aa	ab	ab	aa	ab	ab	ab	ab	aa	aa	bb	ab	ab	bb	ab	ab	aa	bb	bb	bb	ab	bb	ab	ab	ab	bb	aa	ab	bb	ab	ab	ab	ab	aa	bb	ab	ab	ab	ab
[truncated: 2,325 more rows]
[truncated: 154 more columns]

## Sheet: Table S10
Table S10. The genetic position of all the mapped Bin markers in each linkage group
Bin marker ID	Genetic position	Linkage group
Block146	0	A01
Block241	0.5	A01
Block128	1	A01
Block82	2.012	A01
Block129	2.262	A01
Block110	2.512	A01
Block135	2.512	A01
Block79	2.762	A01
Block71	3.267	A01
Block74	3.517	A01
Block70	3.517	A01
Block69	3.517	A01
Block84	3.517	A01
Block28	4.618	A01
Block72	5.22	A01
Block140	5.925	A01
Block285	7.225	A01
Block332	8.627	A01
Block280	9.377	A01
Block334	9.627	A01
Block344	20.516	A01
Block337	23.419	A01
Block395	25.771	A01
Block391	25.771	A01
Block364	25.771	A01
Block378	25.771	A01
Block373	25.771	A01
Block346	25.771	A01
Block367	25.771	A01
Block368	25.771	A01
Block348	25.771	A01
Block342	25.771	A01
Block379	25.771	A01
Block375	25.771	A01
Block339	25.771	A01
Block338	25.771	A01
Block397	26.021	A01
Block398	26.021	A01
Block415	26.271	A01
Block400	26.271	A01
Block416	26.521	A01
Block457	27.021	A01
Block458	27.021	A01
Block456	27.021	A01
Block420	27.271	A01
Block430	27.271	A01
Block431	27.271	A01
Block417	27.271	A01
Block511	27.771	A01
Block406	27.771	A01
Block426	27.771	A01
Block421	27.771	A01
Block514	28.021	A01
Block513	28.771	A01
Block512	28.771	A01
Block515	29.021	A01
Block519	29.021	A01
Block521	29.521	A01
Block726	29.771	A01
Block724	29.771	A01
Block564	30.021	A01
Block496	30.623	A01
Block468	34.329	A01
Block477	36.431	A01
Block486	38.884	A01
Block702	42.46	A01
Block787	44.216	A01
Block866	44.216	A01
Block893	47.522	A01
Block897	48.322	A01
Block766	50.474	A01
Block829	51.024	A01
Block648	52.624	A01
Block638	54.775	A01
Block575	57.028	A01
Block600	60.937	A01
Block607	61.289	A01
Block672	62.589	A01
Block1175	0	A02
Block1176	1.562	A02
Block1177	8.915	A02
Block1179	9.266	A02
Block1210	10.167	A02
Block1222	10.167	A02
Block1251	10.167	A02
Block1249	10.167	A02
Block1261	10.418	A02
Block1259	10.77	A02
Block1263	11.371	A02
Block1340	11.921	A02
Block1345	13.923	A02
Block1337	14.723	A02
Block1342	18.631	A02
Block1287	19.431	A02
Block1346	19.681	A02
Block1347	20.782	A02
Block1283	20.782	A02
Block1280	20.782	A02
Block1277	21.882	A02
Block1276	22.132	A02
Block1272	22.132	A02
Block1292	22.382	A02
Block1296	22.382	A02
Block1297	23.732	A02
Block1306	24.633	A02
Block1302	25.183	A02
Block1310	26.534	A02
Block1323	26.784	A02
Block1318	30.641	A02
Block1353	37.994	A02
Block1427	42.557	A02
Block1424	47.018	A02
Block1374	47.268	A02
Block1382	47.268	A02
Block1386	47.518	A02
Block1401	47.518	A02
Block1454	47.518	A02
Block1426	47.768	A02
Block1359	47.768	A02
Block1356	47.768	A02
Block1376	47.768	A02
Block1388	47.768	A02
Block1385	47.768	A02
Block1387	47.768	A02
Block1393	47.768	A02
Block1409	47.768	A02
Block1394	47.768	A02
Block1460	47.768	A02
Block1463	47.768	A02
Block1408	47.768	A02
Block1433	47.768	A02
Block1411	47.768	A02
Block1396	47.768	A02
Block1400	47.768	A02
Block1423	47.768	A02
Block1447	47.768	A02
Block1413	47.768	A02
Block1466	47.768	A02
Block1383	48.018	A02
Block1434	48.018	A02
Block1451	48.018	A02
Block1467	48.018	A02
Block1465	48.268	A02
Block1450	48.268	A02
Block1471	48.268	A02
Block1487	48.518	A02
Block1500	48.768	A02
Block1484	49.018	A02
Block1497	49.268	A02
Block1496	49.268	A02
Block1498	49.268	A02
Block1486	49.268	A02
Block1478	49.268	A02
Block1472	49.268	A02
Block1477	49.518	A02
Block1475	49.518	A02
Block1483	49.518	A02
Block1510	49.518	A02
Block1469	49.768	A02
Block1470	49.768	A02
Block1532	49.768	A02
Block1502	50.018	A02
Block1504	50.018	A02
Block1525	50.018	A02
Block1530	50.268	A02
Block1528	50.268	A02
Block1522	50.268	A02
Block1527	50.518	A02
Block1558	50.518	A02
Block1506	50.768	A02
Block1512	50.768	A02
Block1545	50.768	A02
Block1556	51.018	A02
Block1544	51.018	A02
Block1570	51.268	A02
Block1569	51.268	A02
Block1571	51.268	A02
Block1573	51.268	A02
Block1572	51.268	A02
Block1567	51.268	A02
Block1575	51.268	A02
Block1576	51.268	A02
Block1534	51.268	A02
Block1539	51.268	A02
Block1555	51.268	A02
Block1533	51.268	A02
Block1543	51.268	A02
Block1563	51.268	A02
Block1583	51.268	A02
Block1562	51.768	A02
Block1537	51.768	A02
Block1585	51.768	A02
Block1581	52.018	A02
Block1595	52.018	A02
Block1592	52.268	A02
Block1596	52.768	A02
Block1597	52.768	A02
Block1614	52.768	A02
Block1602	52.768	A02
Block1608	52.768	A02
Block1609	52.768	A02
Block1604	52.768	A02
Block1625	52.768	A02
Block1610	53.018	A02
Block1627	53.018	A02
Block1631	53.268	A02
Block1646	53.518	A02
Block1647	54.269	A02
Block1635	54.769	A02
Block1629	54.769	A02
Block1628	54.769	A02
Block1640	54.769	A02
Block1674	54.769	A02
Block1659	55.019	A02
Block1650	55.269	A02
Block1645	55.269	A02
Block1653	55.269	A02
Block1665	55.269	A02
Block1706	55.519	A02
Block1655	55.769	A02
Block1657	55.769	A02
Block1673	55.769	A02
Block1671	55.769	A02
Block1712	55.769	A02
Block1663	56.019	A02
Block1662	56.019	A02
Block1669	56.019	A02
Block1668	56.019	A02
Block1667	56.019	A02
Block1680	56.019	A02
Block1716	56.019	A02
Block1679	56.269	A02
Block1681	56.269	A02
Block1713	56.269	A02
Block1717	56.269	A02
Block1714	56.769	A02
Block1715	56.769	A02
Block1721	56.769	A02
Block1723	57.019	A02
Block1727	57.269	A02
Block1730	57.519	A02
Block1726	58.519	A02
Block1734	58.519	A02
Block1729	58.769	A02
Block1728	58.769	A02
Block1738	58.769	A02
Block1731	59.019	A02
Block1793	59.019	A02
Block1798	59.519	A02
Block1740	60.519	A02
Block1772	60.519	A02
Block1771	60.519	A02
Block1739	60.519	A02
Block1747	60.519	A02
Block1762	60.519	A02
Block1746	60.519	A02
Block1736	60.519	A02
Block1744	60.519	A02
Block1737	60.519	A02
Block1760	60.519	A02
Block1765	60.519	A02
Block1757	60.519	A02
Block1810	60.519	A02
Block1782	60.769	A02
Block1785	60.769	A02
Block1795	60.769	A02
Block1796	60.769	A02
Block1907	60.769	A02
Block1797	61.019	A02
Block1809	61.019	A02
Block2017	61.019	A02
Block1811	61.519	A02
Block1905	61.519	A02
Block2088	61.519	A02
Block1946	63.57	A02
Block1955	63.57	A02
Block1992	63.57	A02
Block1996	63.57	A02
Block2012	63.57	A02
Block2042	63.57	A02
Block2044	63.57	A02
Block2092	63.57	A02
Block1982	63.57	A02
Block1967	63.57	A02
Block1945	63.57	A02
Block2040	63.57	A02
Block2001	63.57	A02
Block2109	63.57	A02
Block2048	63.57	A02
Block2083	63.57	A02
Block1906	63.57	A02
Block1991	63.57	A02
Block2099	63.57	A02
Block2019	63.82	A02
Block2023	63.82	A02
Block2091	63.82	A02
Block2090	63.82	A02
Block2096	63.82	A02
Block2094	63.82	A02
Block1993	63.82	A02
Block2011	63.82	A02
Block2043	63.82	A02
Block2087	63.82	A02
Block2089	63.82	A02
Block2093	63.82	A02
Block2095	63.82	A02
Block2100	63.82	A02
Block2097	64.07	A02
Block2098	64.07	A02
Block2102	64.07	A02
Block1874	64.82	A02
Block1862	65.07	A02
Block1854	66.352	A02
Block2103	66.852	A02
Block2101	66.852	A02
Block1843	69.455	A02
Block1863	69.705	A02
Block1864	70.205	A02
Block2130	70.455	A02
Block2139	70.705	A02
Block2183	71.205	A02
Block2152	71.205	A02
Block2229	72.205	A02
Block2224	72.205	A02
Block2228	72.955	A02
Block2138	72.955	A02
Block2140	72.955	A02
Block2231	72.955	A02
Block2230	72.955	A02
Block2141	72.955	A02
Block2142	72.955	A02
Block2398	0	A03
Block2400	0	A03
Block2403	0.5	A03
Block2405	0.5	A03
Block2404	0.75	A03
Block2414	1.25	A03
Block2406	1.75	A03
Block2410	1.75	A03
Block2412	1.75	A03
Block2416	2.25	A03
Block2417	2.5	A03
Block2418	2.75	A03
Block2419	3	A03
Block2420	3.25	A03
Block2429	5.051	A03
Block2431	5.051	A03
Block2428	5.301	A03
Block2430	5.301	A03
Block2433	6.051	A03
Block2439	7.051	A03
Block2440	7.301	A03
Block2442	7.551	A03
Block2447	8.051	A03
Block2450	8.301	A03
Block2452	8.801	A03
Block2451	9.051	A03
Block2461	11.353	A03
Block2464	12.353	A03
Block2465	12.603	A03
Block2466	12.853	A03
Block2467	13.103	A03
Block2468	13.353	A03
Block2469	13.603	A03
Block2471	13.603	A03
Block2481	14.103	A03
Block2494	15.904	A03
Block2495	15.904	A03
Block2497	16.154	A03
Block2505	16.654	A03
Block2500	16.904	A03
Block2502	16.904	A03
Block2507	17.154	A03
Block2506	17.404	A03
Block2513	19.455	A03
Block2518	20.705	A03
Block2519	20.705	A03
Block2522	21.455	A03
Block2523	21.705	A03
Block2524	21.955	A03
Block2525	22.205	A03
Block2526	22.205	A03
Block2527	22.205	A03
Block2528	22.455	A03
Block2529	22.705	A03
Block2530	22.955	A03
Block2532	23.205	A03
Block2534	23.455	A03
Block2536	23.955	A03
Block2538	23.955	A03
Block2540	24.455	A03
Block2542	24.955	A03
Block2544	24.955	A03
Block2545	25.205	A03
Block2549	25.205	A03
Block2543	25.705	A03
Block2547	25.705	A03
Block2552	26.455	A03
Block2554	26.955	A03
Block2555	27.205	A03
Block2558	27.955	A03
Block2569	28.455	A03
Block2570	28.455	A03
Block2571	28.705	A03
Block2573	29.205	A03
Block2574	29.455	A03
Block2578	29.955	A03
Block2579	30.205	A03
Block2581	30.705	A03
Block2583	31.455	A03
Block2585	31.956	A03
Block2587	32.456	A03
Block2590	33.706	A03
Block2591	33.956	A03
Block2592	34.206	A03
Block2593	34.456	A03
Block2595	34.956	A03
Block2597	34.956	A03
Block2598	34.956	A03
Block2599	34.956	A03
Block2600	35.206	A03
Block2606	35.706	A03
Block2605	35.956	A03
Block2604	36.206	A03
Block2609	36.456	A03
Block2610	36.706	A03
Block2611	36.956	A03
Block2614	37.706	A03
Block2618	38.206	A03
Block2619	38.456	A03
Block2620	38.706	A03
Block2621	38.706	A03
Block2623	38.956	A03
Block2637	39.206	A03
Block2638	39.456	A03
Block2641	39.706	A03
Block2642	39.956	A03
Block2643	39.956	A03
Block2644	39.956	A03
Block2646	40.456	A03
Block2647	40.706	A03
Block2653	41.206	A03
Block2657	41.206	A03
Block2659	41.206	A03
Block2652	41.456	A03
Block2662	41.956	A03
Block2663	42.206	A03
Block2664	42.456	A03
Block2666	42.456	A03
Block2667	42.706	A03
Block2668	42.956	A03
Block2669	43.206	A03
Block2678	47.12	A03
Block2679	47.37	A03
Block2682	48.12	A03
Block2684	48.12	A03
Block2688	48.12	A03
Block2696	49.12	A03
Block2699	49.37	A03
Block2700	49.62	A03
Block2701	49.87	A03
Block2704	49.87	A03
Block2708	50.12	A03
Block2710	50.62	A03
Block2715	50.87	A03
Block2719	50.87	A03
Block2725	50.87	A03
Block2714	51.12	A03
Block2727	51.37	A03
Block2728	51.62	A03
Block2713	51.87	A03
Block2717	51.87	A03
Block2721	51.87	A03
Block2723	51.87	A03
Block2722	52.12	A03
Block2726	52.62	A03
Block2732	53.12	A03
Block2735	53.37	A03
Block2731	53.87	A03
Block2733	53.87	A03
Block2738	54.62	A03
Block2753	55.871	A03
Block2762	56.121	A03
Block2761	56.371	A03
Block2756	56.621	A03
Block2755	56.871	A03
Block2766	57.121	A03
Block2790	58.621	A03
Block2793	59.371	A03
Block2798	59.621	A03
Block2802	60.121	A03
Block2801	60.371	A03
Block2803	60.871	A03
Block2806	61.621	A03
Block2805	61.871	A03
Block2807	61.871	A03
Block2810	62.621	A03
Block2811	62.871	A03
Block2813	63.371	A03
Block2817	65.122	A03
Block2819	65.872	A03
Block2823	67.372	A03
Block2825	67.873	A03
Block2826	68.123	A03
Block2827	68.373	A03
Block2829	68.373	A03
Block2830	68.373	A03
Block2828	68.623	A03
Block2831	68.623	A03
Block2832	68.873	A03
Block2839	73.079	A03
Block2841	73.329	A03
Block2843	73.829	A03
Block2844	74.079	A03
Block2846	74.079	A03
Block2848	74.079	A03
Block2845	74.329	A03
Block2851	75.079	A03
Block2854	75.329	A03
Block2855	75.579	A03
Block2856	75.829	A03
Block2861	76.079	A03
Block2863	76.079	A03
Block2865	76.079	A03
Block2867	76.079	A03
Block2859	76.329	A03
Block2860	76.329	A03
Block2866	76.329	A03
Block2868	76.829	A03
Block2870	77.579	A03
Block2871	77.829	A03
Block2872	77.829	A03
Block2874	78.079	A03
Block2876	78.079	A03
Block2875	78.329	A03
Block2877	78.329	A03
Block2878	78.579	A03
Block2882	79.579	A03
Block2883	79.829	A03
Block2885	80.329	A03
Block2890	81.079	A03
Block2900	81.079	A03
Block2898	81.579	A03
Block2902	82.079	A03
Block2904	82.579	A03
Block2909	83.329	A03
Block2908	83.579	A03
Block2917	84.329	A03
Block2916	84.579	A03
Block2920	84.579	A03
Block2924	84.579	A03
Block2921	84.829	A03
Block2915	85.329	A03
Block2919	85.329	A03
Block2929	85.829	A03
Block2932	86.079	A03
Block2930	86.579	A03
Block2937	86.829	A03
Block2934	87.079	A03
Block2936	87.079	A03
Block2938	87.079	A03
Block2940	87.579	A03
Block2941	87.829	A03
Block2943	87.829	A03
Block2945	87.829	A03
Block2951	87.829	A03
Block2942	88.079	A03
Block2944	88.079	A03
Block2947	88.329	A03
Block2961	88.329	A03
Block2957	89.33	A03
Block2959	89.33	A03
Block2948	90.08	A03
Block2960	90.08	A03
Block2966	90.58	A03
Block2969	91.33	A03
Block2971	91.33	A03
Block2970	91.58	A03
Block2972	91.58	A03
Block2974	92.08	A03
Block2975	92.33	A03
Block2977	92.33	A03
Block2976	92.58	A03
Block2978	93.08	A03
Block2980	93.58	A03
Block2982	94.08	A03
Block2987	94.33	A03
Block2986	94.58	A03
Block2988	94.58	A03
Block2992	94.58	A03
Block2994	94.58	A03
Block2993	94.83	A03
Block2989	95.33	A03
Block2997	95.83	A03
Block2998	96.08	A03
Block3000	96.58	A03
Block3001	96.83	A03
Block3003	97.33	A03
Block3004	97.83	A03
Block3006	98.33	A03
Block3009	99.08	A03
Block3015	99.58	A03
Block3014	99.83	A03
Block3017	100.08	A03
Block3018	100.33	A03
Block3020	100.83	A03
Block3022	101.33	A03
Block3027	102.08	A03
Block3025	102.58	A03
Block3030	102.83	A03
Block3035	103.08	A03
Block3067	103.08	A03
Block3076	103.08	A03
Block3031	103.58	A03
Block3080	103.83	A03
Block3081	104.08	A03
Block3092	104.33	A03
Block3085	104.58	A03
Block3090	104.58	A03
Block3091	104.58	A03
Block3087	105.08	A03
Block3093	105.58	A03
Block3095	106.08	A03
Block3103	106.58	A03
Block3102	106.83	A03
Block3106	107.33	A03
Block3105	107.58	A03
Block3107	108.08	A03
Block3108	108.33	A03
Block3109	108.33	A03
Block3110	108.33	A03
Block3112	108.33	A03
Block3111	108.58	A03
Block3113	109.08	A03
Block3114	109.33	A03
Block3120	109.83	A03
Block3118	110.08	A03
Block3123	110.08	A03
Block3121	110.58	A03
Block3125	110.58	A03
Block3127	111.08	A03
Block3129	111.08	A03
Block3131	111.58	A03
Block3132	111.83	A03
Block3133	112.08	A03
Block3134	112.33	A03
Block3142	112.83	A03
Block3136	113.33	A03
Block3137	113.58	A03
Block3156	114.33	A03
Block3159	115.08	A03
Block3163	116.081	A03
Block3165	116.581	A03
Block3164	116.831	A03
Block3166	116.831	A03
Block3169	117.581	A03
Block3171	118.331	A03
Block3172	118.831	A03
Block3177	119.081	A03
Block3174	119.831	A03
Block3175	120.081	A03
Block3181	120.581	A03
Block3183	121.081	A03
Block3185	121.081	A03
Block3188	121.831	A03
Block3198	122.831	A03
Block3192	123.331	A03
Block3194	123.331	A03
Block3203	124.081	A03
Block3207	126.383	A03
Block3210	127.383	A03
Block3214	128.383	A03
Block3213	128.633	A03
Block3215	128.633	A03
Block3218	128.633	A03
Block3221	129.633	A03
Block3606	0	A04
Block3607	0	A04
Block3605	0.25	A04
Block3602	1.001	A04
Block3576	3.803	A04
Block3577	3.803	A04
Block3582	7.644	A04
Block3585	7.894	A04
Block3557	9.145	A04
Block3552	10.645	A04
Block3551	10.895	A04
Block3548	10.895	A04
Block3550	10.895	A04
Block3586	13.698	A04
Block3588	14.198	A04
Block3590	14.698	A04
Block3593	15.448	A04
Block3594	15.698	A04
Block3595	15.948	A04
Block3596	16.698	A04
Block3598	17.719	A04
Block3613	21.627	A04
Block3614	21.877	A04
Block3615	22.382	A04
Block3618	23.143	A04
Block3619	23.393	A04
Block3620	23.643	A04
Block3621	23.893	A04
Block3622	24.143	A04
Block3624	24.143	A04
Block3626	24.143	A04
Block3633	24.643	A04
Block3634	25.143	A04
Block3637	25.393	A04
Block3645	25.393	A04
Block3647	25.393	A04
Block3648	25.643	A04
Block3649	25.643	A04
Block3651	25.643	A04
Block3652	25.893	A04
Block3657	26.143	A04
Block3663	26.143	A04
Block3666	26.143	A04
Block3669	26.143	A04
Block3670	26.143	A04
Block3676	26.393	A04
Block3677	26.643	A04
Block3678	26.893	A04
Block3679	27.143	A04
Block3680	27.393	A04
Block3681	27.643	A04
Block3682	27.893	A04
Block3697	28.143	A04
Block3691	28.143	A04
Block3692	28.143	A04
Block3693	28.143	A04
Block3700	28.143	A04
Block3688	28.393	A04
Block3709	28.893	A04
Block3701	28.893	A04
Block3703	28.893	A04
Block3706	28.893	A04
Block3721	29.143	A04
Block3715	29.143	A04
Block3723	29.393	A04
Block3729	29.393	A04
Block3726	29.393	A04
Block3728	29.393	A04
Block3731	29.893	A04
Block3732	30.143	A04
Block3733	30.393	A04
Block3734	30.643	A04
Block3736	31.643	A04
Block3738	31.643	A04
Block3739	31.893	A04
Block3740	32.143	A04
Block3741	32.393	A04
Block3742	32.643	A04
Block3743	32.893	A04
Block3751	33.894	A04
Block3767	35.144	A04
Block3768	35.394	A04
Block3770	35.894	A04
Block3771	35.894	A04
Block3772	35.894	A04
Block3775	36.644	A04
Block3776	36.894	A04
Block3780	37.394	A04
Block3784	38.144	A04
Block3786	38.644	A04
Block3787	38.894	A04
Block3794	40.394	A04
Block3795	40.644	A04
Block3796	40.894	A04
Block3797	41.144	A04
Block3798	41.394	A04
Block3801	42.145	A04
Block3802	42.395	A04
Block3803	42.645	A04
Block3806	43.395	A04
Block3808	43.395	A04
Block3809	43.645	A04
Block3812	44.145	A04
Block3813	44.145	A04
Block3814	44.395	A04
Block3815	44.645	A04
Block3816	44.895	A04
Block3819	45.645	A04
Block3945	47.445	A04
Block3974	47.695	A04
Block4111	48.696	A04
Block4119	51.111	A04
Block4084	54.717	A04
Block3993	57.821	A04
Block3988	58.071	A04
Block3992	58.071	A04
Block3925	58.821	A04
Block3943	60.872	A04
Block3922	61.622	A04
Block3935	63.924	A04
Block3936	63.924	A04
Block3823	64.174	A04
Block4082	65.925	A04
Block4225	70.841	A04
Block4226	71.091	A04
Block4227	71.341	A04
Block4230	71.591	A04
Block4229	71.841	A04
Block4231	72.341	A04
Block4232	72.591	A04
Block4233	72.841	A04
Block4259	73.091	A04
Block4265	73.091	A04
Block4344	73.841	A04
Block4543	75.591	A04
Block4549	75.591	A04
Block4554	76.091	A04
Block4546	76.591	A04
Block4328	79.093	A04
Block4323	80.094	A04
Block4298	81.094	A04
Block4300	83.095	A04
Block4282	85.146	A04
Block4287	86.146	A04
Block4290	87.146	A04
Block4304	88.146	A04
Block4352	89.397	A04
Block4355	90.397	A04
Block4369	91.397	A04
Block4309	91.897	A04
Block4273	93.698	A04
Block4597	100.693	A04
Block4599	101.975	A04
Block4604	103.487	A04
Block4608	104.237	A04
Block4607	104.237	A04
Block4609	104.237	A04
Block4613	104.237	A04
Block4614	104.487	A04
Block4611	104.487	A04
Block4615	104.987	A04
Block4621	107.539	A04
Block4623	108.039	A04
Block4625	108.289	A04
Block4627	108.539	A04
Block4628	108.789	A04
Block4630	109.289	A04
Block4640	109.789	A04
Block4645	111.04	A04
Block4646	111.04	A04
Block4647	111.29	A04
Block4648	111.54	A04
Block4651	112.54	A04
Block4652	112.79	A04
Block4654	112.79	A04
Block4665	113.04	A04
Block4672	113.29	A04
Block4676	113.29	A04
Block4670	113.54	A04
Block4671	113.54	A04
Block4675	113.54	A04
Block4668	113.54	A04
Block4679	114.04	A04
Block4683	114.54	A04
Block4682	114.79	A04
Block4688	115.29	A04
Block4689	115.54	A04
Block4691	116.04	A04
Block4694	116.29	A04
Block4695	116.54	A04
Block4696	116.79	A04
Block4697	116.79	A04
Block4702	117.29	A04
Block4883	0	A05
Block4886	0	A05
Block4872	0	A05
Block4875	0	A05
Block4870	0	A05
Block4869	0	A05
Block4868	0	A05
Block4865	0	A05
Block4864	0	A05
Block4863	0	A05
Block4843	0	A05
Block4842	0	A05
Block4841	0	A05
Block4846	0	A05
Block4844	0	A05
Block4845	0	A05
Block4847	0	A05
Block4848	0	A05
Block4849	0	A05
Block4850	0	A05
Block4857	0	A05
Block4859	0	A05
Block4854	0	A05
Block4852	0	A05
Block4855	0	A05
Block4856	0	A05
Block4851	0	A05
Block4853	0	A05
Block4860	0	A05
Block4858	0	A05
Block4861	0	A05
Block4862	0	A05
Block4867	0	A05
Block4866	0	A05
Block4871	0	A05
Block4874	0	A05
Block4876	0	A05
Block4873	0	A05
Block4878	0	A05
Block4885	0	A05
Block4879	0.351	A05
Block4877	1.952	A05
Block4884	3.002	A05
Block4881	3.252	A05
Block4880	4.352	A05
Block5002	4.602	A05
Block4890	5.107	A05
Block4882	5.759	A05
Block4895	9.365	A05
Block4892	9.615	A05
Block4918	9.615	A05
Block4887	9.865	A05
Block4953	14.882	A05
Block4893	15.432	A05
Block4959	16.033	A05
Block4960	18.736	A05
Block4952	20.137	A05
Block4891	24.015	A05
Block4944	25.036	A05
Block4945	26.336	A05
Block4948	26.336	A05
Block4951	26.336	A05
Block4939	26.336	A05
Block4964	26.588	A05
Block4942	27.87	A05
Block4966	28.121	A05
Block4950	29.403	A05
Block4967	32.558	A05
Block4975	37.322	A05
Block4978	42.895	A05
Block4973	46.501	A05
Block4968	47.501	A05
Block4937	47.501	A05
Block4974	47.501	A05
Block4946	47.501	A05
Block4972	47.501	A05
Block4969	47.501	A05
Block4949	47.501	A05
Block4979	47.751	A05
Block4965	47.751	A05
Block4943	47.751	A05
Block4971	47.751	A05
Block4987	48.001	A05
Block4988	48.251	A05
Block4989	48.751	A05
Block4990	49.501	A05
Block4991	50.502	A05
Block4977	50.502	A05
Block4993	51.252	A05
Block4976	52.252	A05
Block4994	53.252	A05
Block5003	54.252	A05
Block4961	55.252	A05
Block4995	62.4	A05
Block5004	62.4	A05
Block5001	62.4	A05
Block4992	62.4	A05
Block5054	62.65	A05
Block5005	62.65	A05
Block5057	63.4	A05
Block5055	64.151	A05
Block5061	64.651	A05
Block5063	64.901	A05
Block5069	65.151	A05
Block5074	65.651	A05
Block5075	66.151	A05
Block5076	66.651	A05
Block5077	66.901	A05
Block5078	67.401	A05
Block5079	69.101	A05
Block5081	70.552	A05
Block5080	72.503	A05
Block5083	74.203	A05
Block5082	74.703	A05
Block5086	74.953	A05
Block5085	74.953	A05
Block5087	75.203	A05
Block5089	75.703	A05
Block5084	75.703	A05
Block5091	75.953	A05
Block5090	76.205	A05
Block5094	76.71	A05
Block5093	77.21	A05
Block5096	78.66	A05
Block5099	79.962	A05
Block5095	80.662	A05
Block5101	82.112	A05
Block5098	85.066	A05
Block5103	88.622	A05
Block5104	95.566	A05
Block5105	98.67	A05
Block5106	98.92	A05
Block5107	99.17	A05
Block5097	99.67	A05
Block5108	99.92	A05
Block5109	100.17	A05
Block5111	100.42	A05
Block5102	101.97	A05
Block5113	103.021	A05
Block5114	103.521	A05
Block5100	103.521	A05
Block5115	103.771	A05
Block5116	104.271	A05
Block5110	104.271	A05
Block5117	105.021	A05
Block5118	105.521	A05
Block5112	105.521	A05
Block5119	105.771	A05
Block5120	106.821	A05
Block5121	108.121	A05
Block5123	109.421	A05
Block5124	109.671	A05
Block5125	110.972	A05
Block5122	112.022	A05
Block5131	113.072	A05
Block5129	113.872	A05
Block5128	116.525	A05
Block5130	117.825	A05
Block5126	118.625	A05
Block5190	118.625	A05
Block5136	119.125	A05
Block5140	119.125	A05
Block5134	119.125	A05
Block5137	119.125	A05
Block5132	120.725	A05
Block5138	120.975	A05
Block5139	120.975	A05
Block5150	121.475	A05
Block5146	121.475	A05
Block5147	121.725	A05
Block5153	121.975	A05
Block5143	122.525	A05
Block5144	122.525	A05
Block5135	125.33	A05
Block5159	126.481	A05
Block5158	129.139	A05
Block5157	131.04	A05
Block5142	131.745	A05
Block5154	131.745	A05
Block5196	132.845	A05
Block5155	132.845	A05
Block5151	133.095	A05
Block5152	133.095	A05
Block5208	133.645	A05
Block5195	133.895	A05
Block5205	134.145	A05
Block5156	134.395	A05
Block5199	134.395	A05
Block5218	135.195	A05
Block5224	135.445	A05
Block5149	135.445	A05
Block5145	135.445	A05
Block5141	135.445	A05
Block5148	135.445	A05
Block5204	135.445	A05
Block5240	136.897	A05
Block5247	138.247	A05
Block5269	139.597	A05
Block5197	139.847	A05
Block5198	142.972	A05
Block5267	147.031	A05
Block5220	148.081	A05
Block5228	148.881	A05
Block5223	149.381	A05
Block5237	149.881	A05
Block5262	149.881	A05
Block5243	150.131	A05
Block5266	150.131	A05
Block5259	150.881	A05
Block5231	150.881	A05
Block5226	150.881	A05
Block5225	150.881	A05
Block5241	150.881	A05
Block5233	150.881	A05
Block5250	151.131	A05
Block5249	151.131	A05
Block5246	151.131	A05
Block5263	151.131	A05
Block5133	151.131	A05
Block5232	151.131	A05
Block5268	151.131	A05
Block5251	151.131	A05
Block5236	151.131	A05
Block5260	151.131	A05
Block5235	151.131	A05
Block5234	151.131	A05
Block5242	151.131	A05
Block5238	151.131	A05
Block5258	151.631	A05
Block5257	151.631	A05
Block5256	151.631	A05
Block5255	151.631	A05
Block5254	151.631	A05
Block5253	151.631	A05
Block5252	151.631	A05
Block5283	0	A06
Block5289	0	A06
Block5286	0	A06
Block5279	0.25	A06
Block5333	0.75	A06
Block5335	1.25	A06
Block5337	1.75	A06
Block5340	2.25	A06
Block5341	2.75	A06
Block5342	3	A06
Block5345	3.5	A06
Block5350	4.25	A06
Block5348	4.25	A06
Block5349	4.25	A06
Block5451	7.856	A06
Block5452	7.856	A06
Block5453	8.106	A06
Block5456	8.856	A06
Block5457	9.106	A06
Block5455	9.106	A06
Block5461	10.106	A06
Block5465	10.606	A06
Block5466	10.606	A06
Block5511	11.356	A06
Block5731	16.779	A06
Block5736	17.529	A06
Block5738	18.029	A06
Block5742	18.529	A06
Block5744	19.029	A06
Block5751	19.529	A06
Block5752	19.779	A06
Block5757	20.529	A06
Block5761	21.029	A06
Block5767	21.529	A06
Block5772	21.779	A06
Block5774	22.279	A06
Block5778	22.779	A06
Block5779	22.779	A06
Block5790	22.779	A06
Block5788	22.779	A06
Block5794	23.029	A06
Block5793	23.029	A06
Block5795	23.279	A06
Block5806	23.529	A06
Block5796	23.529	A06
Block5807	23.779	A06
Block5809	24.029	A06
Block5801	24.279	A06
Block5812	24.779	A06
Block5815	25.279	A06
Block5820	25.279	A06
Block5822	25.779	A06
Block5824	26.029	A06
Block5827	26.529	A06
Block5829	27.029	A06
Block5832	27.279	A06
Block5946	28.78	A06
Block5948	29.03	A06
Block5949	29.03	A06
Block5984	30.53	A06
Block5990	31.28	A06
Block5988	31.28	A06
Block5993	32.03	A06
Block5995	32.28	A06
Block6003	33.03	A06
Block6124	34.581	A06
Block6138	35.331	A06
Block6144	35.581	A06
Block6143	35.581	A06
Block6147	35.831	A06
Block6145	36.331	A06
Block6198	37.331	A06
Block6194	37.331	A06
Block6199	37.581	A06
Block6204	37.831	A06
Block6203	37.831	A06
Block6200	37.831	A06
Block6206	37.831	A06
Block6207	38.081	A06
Block6202	38.081	A06
Block6201	38.081	A06
Block6212	38.581	A06
Block6210	38.831	A06
Block6216	39.081	A06
Block6215	39.081	A06
Block6214	39.081	A06
Block6213	39.331	A06
Block6219	39.581	A06
Block6218	39.581	A06
Block6223	39.831	A06
Block6221	39.831	A06
Block6222	39.831	A06
Block6227	40.081	A06
Block6230	40.331	A06
Block6229	40.331	A06
Block6225	40.331	A06
Block6234	40.581	A06
Block6232	40.581	A06
Block6233	40.831	A06
Block6240	41.081	A06
Block6238	41.331	A06
Block6237	41.331	A06
Block6243	41.831	A06
Block6242	41.831	A06
Block6241	41.831	A06
Block6266	42.081	A06
Block6249	42.081	A06
Block6245	42.081	A06
Block6250	42.081	A06
Block6248	42.081	A06
Block6244	42.081	A06
Block6267	42.331	A06
Block6269	42.581	A06
Block6268	42.581	A06
Block6283	42.831	A06
Block6282	42.831	A06
Block6286	43.081	A06
Block6287	43.331	A06
Block6285	43.331	A06
Block6272	43.331	A06
Block6288	43.581	A06
Block6289	43.831	A06
Block6296	44.081	A06
Block6290	44.081	A06
Block6293	44.331	A06
Block6294	44.581	A06
Block6291	44.831	A06
Block6302	45.081	A06
Block6298	45.081	A06
Block6297	45.331	A06
Block6300	45.581	A06
Block6301	45.831	A06
Block6304	46.331	A06
Block6303	46.331	A06
Block6305	46.581	A06
Block6306	46.831	A06
Block6313	46.831	A06
Block6311	46.831	A06
Block6307	46.831	A06
Block6314	47.081	A06
Block6310	47.081	A06
Block6308	47.081	A06
Block6315	47.331	A06
Block6316	47.331	A06
Block6319	47.831	A06
Block6320	48.081	A06
Block6321	48.081	A06
Block6322	48.331	A06
Block6325	48.581	A06
Block6324	48.581	A06
Block6329	48.831	A06
Block6328	48.831	A06
Block6327	48.831	A06
Block6330	49.081	A06
Block6333	49.081	A06
Block6336	49.331	A06
Block6335	49.331	A06
Block6337	49.331	A06
Block6340	49.331	A06
Block6351	49.581	A06
Block6349	49.581	A06
Block6341	49.581	A06
Block6343	49.581	A06
Block6350	49.581	A06
Block6348	49.581	A06
Block6342	49.581	A06
Block6372	50.081	A06
Block6370	50.081	A06
Block6358	50.081	A06
Block6354	50.081	A06
Block6366	50.081	A06
Block6362	50.081	A06
Block6361	50.081	A06
Block6369	50.081	A06
Block6359	50.081	A06
Block6357	50.081	A06
Block6373	50.331	A06
Block6378	50.831	A06
Block6379	50.831	A06
Block6377	50.831	A06
Block6381	51.331	A06
Block6384	51.331	A06
Block6397	51.581	A06
Block6407	51.581	A06
Block6403	51.581	A06
Block6399	51.581	A06
Block6386	51.581	A06
Block6404	51.581	A06
Block6418	51.581	A06
Block6410	51.831	A06
Block6406	51.831	A06
Block6423	52.331	A06
Block6421	52.331	A06
Block6424	52.581	A06
Block6425	52.581	A06
Block6426	52.831	A06
Block6429	53.331	A06
Block6431	53.831	A06
Block6433	54.331	A06
Block6436	54.581	A06
Block6435	54.581	A06
Block6437	54.831	A06
Block6440	55.081	A06
Block6443	55.331	A06
Block6441	55.331	A06
Block6442	55.331	A06
Block6444	55.581	A06
Block6445	55.831	A06
Block6450	56.081	A06
Block6446	56.081	A06
Block6449	56.081	A06
Block6448	56.081	A06
Block6452	56.331	A06
Block6456	56.581	A06
Block6457	56.831	A06
Block6460	57.331	A06
Block6463	57.831	A06
Block6485	58.081	A06
Block6462	58.081	A06
Block6564	59.081	A06
Block6535	59.331	A06
Block6536	59.331	A06
Block6548	62.134	A06
Block6478	63.385	A06
Block6583	65.135	A06
Block6615	68.239	A06
Block6619	69.239	A06
Block6620	69.489	A06
Block6654	69.989	A06
Block6655	70.239	A06
Block6691	70.739	A06
Block6647	71.489	A06
Block6651	72.74	A06
Block6638	73.49	A06
Block6663	73.74	A06
Block6665	73.99	A06
Block6674	74.24	A06
Block6686	74.74	A06
Block6679	74.99	A06
Block6683	74.99	A06
Block6680	74.99	A06
Block6681	75.49	A06
Block6743	77.291	A06
Block6748	78.291	A06
Block6751	78.892	A06
Block6756	79.743	A06
Block6755	80.243	A06
Block6779	81.095	A06
Block6840	83.647	A06
Block6894	85.698	A06
Block6904	86.198	A06
Block6920	88.249	A06
Block6923	88.999	A06
Block6949	91.602	A06
Block6974	92.453	A06
Block6981	93.203	A06
Block7011	93.953	A06
Block7012	94.203	A06
Block7013	94.203	A06
Block7113	94.703	A06
Block7020	95.703	A06
Block6988	95.703	A06
Block7090	97.254	A06
Block7099	97.754	A06
Block7046	98.254	A06
Block7082	98.754	A06
Block6962	100.555	A06
Block6961	100.805	A06
Block6955	103.658	A06
Block6952	105.158	A06
Block7034	105.658	A06
Block7032	105.658	A06
Block7035	105.908	A06
Block7036	106.158	A06
Block7037	106.408	A06
Block7050	106.658	A06
Block7059	106.908	A06
Block7072	107.158	A06
Block7061	107.158	A06
Block7127	108.408	A06
Block7161	111.512	A06
Block7146	111.762	A06
Block7145	111.762	A06
Block7189	113.313	A06
Block7188	113.313	A06
Block7186	113.313	A06
Block7185	113.313	A06
Block7177	113.313	A06
Block7190	116.166	A06
Block7639	0	A07
Block7637	0	A07
Block7640	0.25	A07
Block7638	0.25	A07
Block7641	0.5	A07
Block7648	0.75	A07
Block7644	0.75	A07
Block7642	0.75	A07
Block7650	1	A07
Block7653	1.5	A07
Block7654	1.75	A07
Block7655	2	A07
Block7657	2.5	A07
Block7662	2.75	A07
Block7660	2.75	A07
Block7658	2.75	A07
Block7663	3	A07
Block7661	3	A07
Block7665	3.25	A07
Block7664	3.25	A07
Block7669	4	A07
Block7674	4.25	A07
Block7672	4.25	A07
Block7673	4.5	A07
Block7671	4.5	A07
Block7675	5	A07
Block7676	5.25	A07
Block7677	5.5	A07
Block7693	6.25	A07
Block7691	7	A07
Block7687	7.5	A07
Block7685	8	A07
Block7682	8.75	A07
Block7696	9.5	A07
Block7702	10	A07
Block7704	10.5	A07
Block7707	11.25	A07
Block7708	11.5	A07
Block7722	12	A07
Block7714	12	A07
Block7721	12.25	A07
Block7715	12.25	A07
Block7719	12.75	A07
Block7711	12.75	A07
Block7724	13	A07
Block7730	13.751	A07
Block7732	14.001	A07
Block7744	14.501	A07
Block7740	14.501	A07
Block7738	14.501	A07
Block7741	14.751	A07
Block7739	14.751	A07
Block7743	15.251	A07
Block7737	15.251	A07
Block7746	15.501	A07
Block7747	15.751	A07
Block7748	16.001	A07
Block7750	16.501	A07
Block7751	16.751	A07
Block7754	17.501	A07
Block7755	18.251	A07
Block7756	18.602	A07
Block7757	19.102	A07
Block7758	19.352	A07
Block7761	20.102	A07
Block7787	31.08	A07
Block7788	31.33	A07
Block7791	31.58	A07
Block7789	31.58	A07
Block7790	31.83	A07
Block7792	32.33	A07
Block7793	32.58	A07
Block7798	32.83	A07
Block7794	32.83	A07
Block7796	33.08	A07
Block7800	33.33	A07
Block7801	33.58	A07
Block7806	33.83	A07
Block7807	34.08	A07
Block7810	34.33	A07
Block7808	34.33	A07
Block7812	34.83	A07
Block7813	35.08	A07
Block7814	35.33	A07
Block7820	35.58	A07
Block7819	35.83	A07
Block7815	35.83	A07
Block7823	36.33	A07
Block7824	36.58	A07
Block7830	37.08	A07
Block7829	37.08	A07
Block7826	37.08	A07
Block7827	37.33	A07
Block7835	37.83	A07
Block7832	37.83	A07
Block7831	37.83	A07
Block7836	38.08	A07
Block7837	38.33	A07
Block7838	38.58	A07
Block7842	39.08	A07
Block7841	39.33	A07
Block7843	39.83	A07
Block7846	40.08	A07
Block7844	40.08	A07
Block7847	40.58	A07
Block7850	41.881	A07
Block7854	43.482	A07
Block7861	49.177	A07
Block7864	50.178	A07
Block7868	50.678	A07
Block7867	50.678	A07
Block7872	53.23	A07
Block7874	54.23	A07
Block7875	55.23	A07
Block7896	62.033	A07
Block7899	63.033	A07
Block7902	65.084	A07
Block7905	66.085	A07
Block7909	67.635	A07
Block7913	68.635	A07
Block7915	69.135	A07
Block7916	69.385	A07
Block7925	70.135	A07
Block7926	70.385	A07
Block7931	72.186	A07
Block7932	72.436	A07
Block7936	73.436	A07
Block7997	75.738	A07
Block8125	77.539	A07
Block8210	78.289	A07
Block8216	78.539	A07
Block8217	78.789	A07
Block8231	79.64	A07
Block8240	80.14	A07
Block8241	80.39	A07
Block8242	80.64	A07
Block8243	80.89	A07
Block8245	81.39	A07
Block8248	81.64	A07
Block8244	81.64	A07
Block8250	82.14	A07
Block8251	82.39	A07
Block8252	82.64	A07
Block8254	82.89	A07
Block8267	83.14	A07
Block8264	83.14	A07
Block8261	83.14	A07
Block8259	83.39	A07
Block8258	83.39	A07
Block8393	0	A08
Block8386	0	A08
Block8384	0	A08
Block8389	0.8	A08
Block8385	0.8	A08
Block8390	0.8	A08
Block8379	1.6	A08
Block8383	1.6	A08
Block8409	2.4	A08
Block8395	2.4	A08
Block8406	2.4	A08
Block8398	2.4	A08
Block8401	2.4	A08
Block8402	2.4	A08
Block8400	2.4	A08
Block8403	2.4	A08
Block8399	2.4	A08
Block8404	2.4	A08
Block8392	2.4	A08
Block8407	2.4	A08
Block8391	2.4	A08
Block8408	3.7	A08
Block8413	7.156	A08
Block8410	10.31	A08
Block8415	12.111	A08
Block8414	12.361	A08
Block8412	13.111	A08
Block8418	13.361	A08
Block8419	14.361	A08
Block8420	15.361	A08
Block8421	15.611	A08
Block8422	16.212	A08
Block8411	16.212	A08
Block8416	16.212	A08
Block8423	16.462	A08
Block8417	16.462	A08
Block8424	16.712	A08
Block8425	17.462	A08
Block8426	18.712	A08
Block8428	19.564	A08
Block8431	20.665	A08
Block8432	21.62	A08
Block8433	22.382	A08
Block8435	22.733	A08
Block8437	23.835	A08
Block8434	24.085	A08
Block8436	25.335	A08
Block8439	26.335	A08
Block8440	27.585	A08
Block8443	28.335	A08
Block8444	29.886	A08
Block8441	30.136	A08
Block8442	30.636	A08
Block8445	30.636	A08
Block8447	31.386	A08
Block8438	31.386	A08
Block8448	31.886	A08
Block8446	31.886	A08
Block8449	32.386	A08
Block8450	33.136	A08
Block8451	34.136	A08
Block8452	34.386	A08
Block8453	35.386	A08
Block8454	38.54	A08
Block8455	39.29	A08
Block8456	39.791	A08
Block8457	40.041	A08
Block8458	41.591	A08
Block8459	43.692	A08
Block8460	43.942	A08
Block8462	44.742	A08
Block8461	45.242	A08
Block8463	45.492	A08
Block8465	46.542	A08
Block8464	47.093	A08
Block8466	47.643	A08
Block8467	48.443	A08
Block8469	48.693	A08
Block8470	48.943	A08
Block8471	49.193	A08
Block8472	49.993	A08
Block8474	50.243	A08
Block8473	50.793	A08
Block8476	51.043	A08
Block8477	51.293	A08
Block8478	51.843	A08
Block8479	53.193	A08
Block8480	53.993	A08
Block8481	55.093	A08
Block8475	55.093	A08
Block8482	55.343	A08
Block8483	56.143	A08
Block8484	56.693	A08
Block8531	57.243	A08
Block8490	57.493	A08
Block8493	58.293	A08
Block8492	58.543	A08
Block8534	58.793	A08
Block8491	59.043	A08
Block8528	59.594	A08
Block8532	60.144	A08
Block8529	61.244	A08
Block8536	63.996	A08
Block8535	66.448	A08
Block8533	70.507	A08
Block8556	72.609	A08
Block8553	77.423	A08
Block8558	83.808	A08
Block8537	86.862	A08
Block8582	87.362	A08
Block8559	87.612	A08
Block8555	87.612	A08
Block8554	87.612	A08
Block8557	87.612	A08
Block8530	87.612	A08
Block8589	87.612	A08
Block8576	87.862	A08
Block8564	87.862	A08
Block8586	88.112	A08
Block8560	88.362	A08
Block8561	88.362	A08
Block8552	88.612	A08
Block8578	88.612	A08
Block8571	88.612	A08
Block8563	88.612	A08
Block8595	102.23	A08
Block8596	102.98	A08
Block8568	102.98	A08
Block8601	105.231	A08
Block8602	105.982	A08
Block8613	106.732	A08
Block8590	106.732	A08
Block8611	106.982	A08
Block8551	106.982	A08
Block8570	106.982	A08
Block8562	106.982	A08
Block8616	106.982	A08
Block8623	107.232	A08
Block8565	107.232	A08
Block8566	107.232	A08
Block8567	107.232	A08
Block8569	107.232	A08
Block8592	107.232	A08
Block8622	107.482	A08
Block8624	107.482	A08
Block8632	107.732	A08
Block8575	107.732	A08
Block8581	107.732	A08
Block8580	107.732	A08
Block8573	107.732	A08
Block8577	107.732	A08
Block8579	107.732	A08
Block8572	107.732	A08
Block8574	107.732	A08
Block8625	107.732	A08
Block8626	107.982	A08
Block8588	107.982	A08
Block8583	107.982	A08
Block8585	107.982	A08
Block8587	107.982	A08
Block8584	107.982	A08
Block8597	107.982	A08
Block8627	108.232	A08
Block8630	108.232	A08
Block8631	108.482	A08
Block8635	108.732	A08
Block8593	108.732	A08
Block8604	108.732	A08
Block8638	108.982	A08
Block8657	109.232	A08
Block8641	109.482	A08
Block8598	109.482	A08
Block8599	109.482	A08
Block8600	109.482	A08
Block8643	109.482	A08
Block8644	109.732	A08
Block8640	109.982	A08
Block8615	109.982	A08
Block8614	109.982	A08
Block8606	109.982	A08
Block8610	109.982	A08
Block8609	109.982	A08
Block8617	109.982	A08
Block8618	109.982	A08
Block8621	109.982	A08
Block8608	109.982	A08
Block8612	109.982	A08
Block8603	109.982	A08
Block8605	109.982	A08
Block8607	109.982	A08
Block8642	109.982	A08
Block8649	110.232	A08
Block8620	110.232	A08
Block8619	110.232	A08
Block8655	110.232	A08
Block8662	110.482	A08
Block8656	110.482	A08
Block8665	110.732	A08
Block8658	110.982	A08
Block8668	111.232	A08
Block8629	111.232	A08
Block8628	111.232	A08
Block8659	111.232	A08
Block8660	111.482	A08
Block8634	111.482	A08
Block8637	111.482	A08
Block8636	111.482	A08
Block8639	111.482	A08
Block8633	111.482	A08
Block8647	111.482	A08
Block8661	111.732	A08
Block8674	111.982	A08
Block8663	112.232	A08
Block8676	112.482	A08
Block8645	112.482	A08
Block8648	112.482	A08
Block8646	112.482	A08
Block8666	112.482	A08
Block8667	112.732	A08
Block8669	112.982	A08
Block8671	112.982	A08
Block8672	113.232	A08
Block8651	113.232	A08
Block8652	113.232	A08
Block8653	113.232	A08
Block8650	113.232	A08
Block8654	113.232	A08
Block8673	113.232	A08
Block8684	113.482	A08
Block8675	113.732	A08
Block8698	113.982	A08
Block8677	114.232	A08
Block8682	114.732	A08
Block8683	114.982	A08
Block8685	115.233	A08
Block8691	115.733	A08
Block8664	115.733	A08
Block8692	115.733	A08
Block8706	115.983	A08
Block8699	116.233	A08
Block8696	116.233	A08
Block8697	116.483	A08
Block8670	116.483	A08
Block8678	116.483	A08
Block8702	116.733	A08
Block8693	116.733	A08
Block8700	116.983	A08
Block8705	117.233	A08
Block8713	117.483	A08
Block8707	117.733	A08
Block8708	117.983	A08
Block8679	117.983	A08
Block8701	117.983	A08
Block8716	118.233	A08
Block8681	118.233	A08
Block8680	118.233	A08
Block8709	118.233	A08
Block8712	118.483	A08
Block8687	118.483	A08
Block8688	118.483	A08
Block8689	118.483	A08
Block8686	118.483	A08
Block8690	118.483	A08
Block8711	118.483	A08
Block8722	118.733	A08
Block8710	118.733	A08
Block8724	118.983	A08
Block8725	119.233	A08
Block8694	119.233	A08
Block8695	119.233	A08
Block8714	119.233	A08
Block8727	119.483	A08
Block8703	119.483	A08
Block8704	119.483	A08
Block8715	119.483	A08
Block8726	119.733	A08
Block8717	120.483	A08
Block8736	120.983	A08
Block8723	122.233	A08
Block8743	123.734	A08
Block8728	123.984	A08
Block8731	124.234	A08
Block8735	124.984	A08
Block8730	124.984	A08
Block8738	125.489	A08
Block8747	135.13	A08
Block8745	147.901	A08
Block8760	152.862	A08
Block8759	153.862	A08
Block8762	154.613	A08
Block8781	154.863	A08
Block8779	156.363	A08
Block8721	156.363	A08
Block8719	156.363	A08
Block8720	156.363	A08
Block8718	156.363	A08
Block8749	156.363	A08
Block8773	156.613	A08
Block8758	156.863	A08
Block8774	156.863	A08
Block8772	157.113	A08
Block8729	157.113	A08
Block8737	157.113	A08
Block8778	157.113	A08
Block8770	157.363	A08
Block8732	157.363	A08
Block8733	157.363	A08
Block8734	157.363	A08
Block8775	157.363	A08
Block8761	157.613	A08
Block8767	157.863	A08
Block8757	157.863	A08
Block8742	157.863	A08
Block8741	157.863	A08
Block8740	157.863	A08
Block8748	157.863	A08
Block8750	157.863	A08
Block8751	157.863	A08
Block8752	157.863	A08
Block8753	157.863	A08
Block8744	157.863	A08
Block8746	157.863	A08
Block8739	157.863	A08
Block8776	157.863	A08
Block8766	158.113	A08
Block8765	158.113	A08
Block8764	158.113	A08
Block8777	158.113	A08
Block8763	158.113	A08
Block8755	158.113	A08
Block8756	158.113	A08
Block8754	158.113	A08
Block8780	158.113	A08
Block8769	158.113	A08
Block8768	158.113	A08
Block8919	0	A09
Block8917	0	A09
Block8929	0.25	A09
Block9170	1.5	A09
Block9168	1.5	A09
Block9169	1.75	A09
Block9167	1.75	A09
Block9191	2	A09
Block9179	2	A09
Block9178	2	A09
Block9204	2.25	A09
Block9200	2.25	A09
Block9198	2.25	A09
Block9196	2.25	A09
Block9192	2.25	A09
Block9190	2.25	A09
Block9181	2.25	A09
Block9177	2.25	A09
Block9175	2.25	A09
Block9214	2.5	A09
Block9203	2.5	A09
Block9201	2.5	A09
Block9243	3.25	A09
Block9241	3.25	A09
Block9239	3.25	A09
Block9237	3.25	A09
Block9236	3.25	A09
Block9235	3.25	A09
Block9233	3.25	A09
Block9232	3.25	A09
Block9231	3.25	A09
Block9229	3.25	A09
Block9226	3.25	A09
Block9224	3.25	A09
Block9221	3.25	A09
Block9220	3.25	A09
Block9216	3.25	A09
Block9225	3.5	A09
Block9219	3.5	A09
Block9242	4	A09
Block9246	4.25	A09
Block9254	4.5	A09
Block9248	4.5	A09
Block9244	4.5	A09
Block9253	4.75	A09
Block9249	4.75	A09
Block9255	5.25	A09
Block9256	5.5	A09
Block9419	5.75	A09
Block9417	5.75	A09
Block9413	5.75	A09
Block9409	5.75	A09
Block9401	5.75	A09
Block9382	5.75	A09
Block9353	5.75	A09
Block9351	5.75	A09
Block9347	5.75	A09
Block9317	5.75	A09
Block9313	5.75	A09
Block9294	5.75	A09
Block9279	5.75	A09
Block9273	5.75	A09
Block9269	5.75	A09
Block9263	5.75	A09
Block9261	5.75	A09
Block9257	5.75	A09
Block9414	6	A09
Block9318	6	A09
Block9316	6	A09
Block9304	6	A09
Block9274	6	A09
Block9272	6	A09
Block9270	6	A09
Block9262	6	A09
Block9260	6	A09
Block9418	6.5	A09
Block9416	6.5	A09
Block9398	6.5	A09
Block9392	6.5	A09
Block9387	6.5	A09
Block9384	6.5	A09
Block9352	6.5	A09
Block9405	6.75	A09
Block9399	6.75	A09
Block9400	7	A09
Block9420	7.5	A09
Block9435	7.75	A09
Block9432	7.75	A09
Block9426	7.75	A09
Block9425	7.75	A09
Block9421	7.75	A09
Block9424	8	A09
Block9422	8	A09
Block9439	8.25	A09
Block9448	8.5	A09
Block9442	8.5	A09
Block9438	8.5	A09
Block9437	8.5	A09
Block9449	8.75	A09
Block9444	8.75	A09
Block9451	9.5	A09
Block9453	10.25	A09
Block9457	11.25	A09
Block9458	11.5	A09
Block9461	12.25	A09
Block9462	12.5	A09
Block9463	13.25	A09
Block9464	14	A09
Block9465	14.25	A09
Block9466	14.75	A09
Block9467	15	A09
Block9468	15.5	A09
Block9473	15.75	A09
Block9469	15.75	A09
Block9475	16.25	A09
Block9478	16.5	A09
Block9476	16.5	A09
Block9506	17	A09
Block9505	17	A09
Block9504	17	A09
Block9493	17.5	A09
[truncated: 2,325 more rows]

[truncated: 6 more sheets: Table S11, Table S12, Table S13, Table S14, Table S15, Table S16]
